# Supplementary material for: Cascade dearomative [4 + 2] cycloaddition of indoles with in situ generated ortho-quinone methides: practical access to divergent indoline-fused polycycles
Source: Royal Society of Chemistry journal article supplement (doi:10.1039/d2gc00387b), 2022-01-01
Supplement: d2gc00387b1.pdf [file d2gc00387b1.pdf]

# Supporting Information

## Cascade dearomatizative [4+2] cycloaddition of indoles with *in situ* generated *ortho*-quinone methide: practical access to divergent indoline-fused polycycles

Pei-Zhen Dong<sup>‡, a</sup>, Bin Qiu<sup>‡, a</sup>, Xiao-De An<sup>a</sup> and Jian Xiao<sup>\*a, b</sup>

<sup>a</sup> College of Chemistry and Pharmaceutical Sciences, Qingdao Agricultural University, Qingdao 266109, China.  
Email: chemjianxiao@163.com.

<sup>b</sup> College of Marine Science and Engineering, Qingdao Agricultural University, Qingdao 266109, China.

<sup>‡</sup>These authors contributed equally

### Table of Contents

|                                                        |      |
|--------------------------------------------------------|------|
| 1. General Information.....                            | S2   |
| 2. General Procedure.....                              | S3   |
| 3. Mechanistic Study.....                              | S7   |
| 4. The Effect of Loading of Pyrrolidine.....           | S8   |
| 5. Characterization of Products.....                   | S9   |
| 6. <sup>1</sup> H and <sup>13</sup> C NMR Spectra..... | S43  |
| 7. X-ray Crystallography Data.....                     | S126 |

## 1. General Information

Unless otherwise noted, all reagents and solvents were purchased from the commercial sources and used as received. Thin layer chromatography (TLC) was used to monitor the reaction on Merck 60 F254 precoated silica gel plate (0.2 mm thickness). TLC spots were visualized by UV-light irradiation on Spectroline Model ENF-24061/F 254 nm. The products were isolated by direct filtration or purified by flash column chromatography (200-300 mesh silica gel) eluted with the gradient of petroleum ether and ethyl acetate.  $^1\text{H}$ ,  $^{13}\text{C}$  and  $^{19}\text{F}$  NMR spectra were recorded on a Bruker AMX 500 (500 MHz for  $^1\text{H}$ , 126 MHz for  $^{13}\text{C}$  and 470 MHz for  $^{19}\text{F}$  NMR) spectrometer at room temperature. The chemical shifts were reported in parts per million (ppm), downfield from  $\text{SiMe}_4$  ( $\delta$  0.0) and relative to the signal of chloroform-d ( $\delta$  7.26, singlet) or dimethyl sulfoxide- $\text{d}_6$  ( $\delta$  2.54, singlet). Multiplicities were afforded as: s (singlet); d (doublet); t (triplet); q (quartet); dd (doublets of doublet) or m (multiplets). The number of protons for a given resonance is indicated by nH. Coupling constants were reported as a  $J$  value in Hz. Carbon nuclear magnetic resonance spectra ( $^{13}\text{C}$  NMR) was referenced to the appropriate residual solvent peak. High resolution mass spectral analysis (HRMS) was performed on Waters XEVO G2 Q-TOF. Melting points were determined on a microscopic melting point apparatus and are uncorrected. The X-ray diffraction analysis were performed on Gemini E/EOS.

## 2. General Procedure

### 2.1 General procedure for the synthesis of 3aa-3ma.

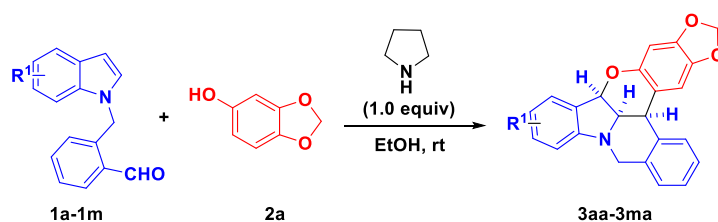

A sealed tube was charged with 2-((1H-indol-1-yl)methyl)benzaldehyde **1a-1m** (0.12 mmol), 3,4-(methylenedioxy)-phenol (0.1 mmol), pyrrolidine (0.1 mmol, 7.1 mg) and EtOH (1.0 mL). The mixture was stirred at room temperature under an air atmosphere. After completion of the reaction as indicated by TLC analysis, the solid product was collected by filtering and washed with EtOH to get **3aa-3ha** and **3ja**, and the mixture was concentrated in vacuum and the residue was directly purified by flash column chromatography on silica gel (eluent: ethyl acetate/petroleum ether = 1:10) to afford the desired product **3ia**, **3ka**, **3la**, **3ma**.

### 2.2 General procedure for the synthesis of 5aa-5na.

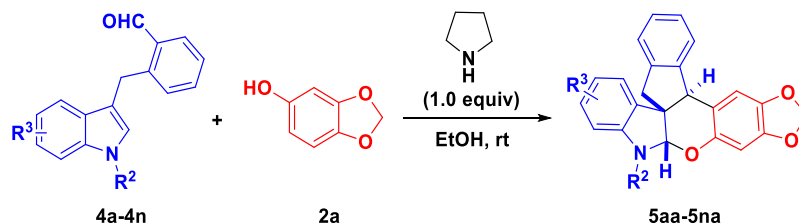

A sealed tube was charged with 2-((1H-indol-3-yl)methyl)benzaldehyde **4a-4n** (0.12 mmol), 3,4-(methylenedioxy)-phenol (0.1 mmol), pyrrolidine (0.1 mmol, 7.1 mg) and EtOH (1.0 mL). The mixture was stirred at room temperature under an air atmosphere. After completion of the reaction as indicated by TLC analysis, the solid product was collected by filtering and washed with EtOH to get **5aa**, **5ba**, **5da**, **5ea**, **5fa**, **5ga**, **5ja**, **5ka**, **5la**, **5ma**, **5na**, and the mixture was concentrated in vacuum and the residue was directly purified by flash column chromatography on silica gel (eluent: ethyl acetate/petroleum ether = 1:10) to afford the desired product **5ca**, **5ha**, **5ia**.

### 2.3 General procedure for the synthesis of 6ab-6mb.

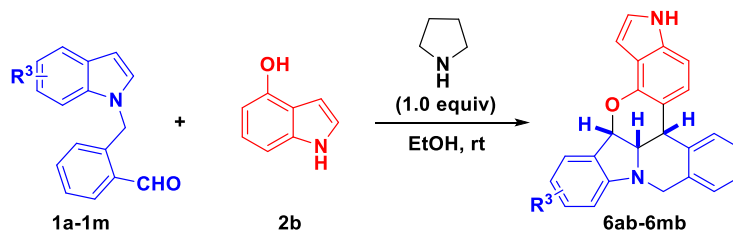

A sealed tube was charged with 2-((1H-indol-1-yl)methyl)benzaldehyde **1a-1m** (0.12 mmol), 4-hydroxyindole (0.1 mmol), pyrrolidine (0.1 mmol, 7.1 mg) and EtOH (1.0 mL). The mixture was stirred at room temperature under an air atmosphere. After completion of the reaction as indicated by TLC analysis, the solid product was collected by filtering and washed with EtOH to get **6ab**, **6bb**, **6cb**, **6db**, **6eb**, **6fb**, **6ib**, **6jb**, **6lb**, and the filtrate mixture was concentrated in vacuum and the residue was directly purified by flash column chromatography on silica gel (eluent: ethyl acetate/petroleum ether = 1:5) to afford the desired product **6gb**, **6hb**, **6kb**, **6mb**.

### 2.4 General procedure for the the synthesis of 2-((1H-indol-1-yl)methyl) benzaldehyde 1a-1m.

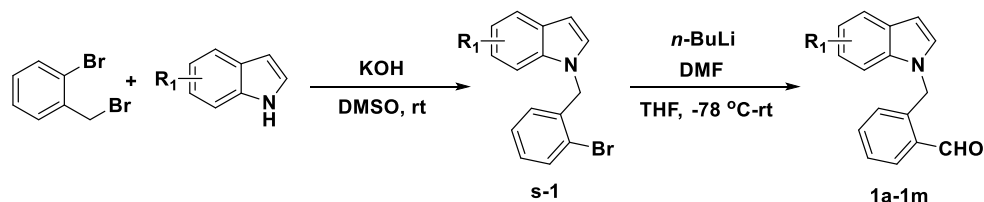

-1<sup>st</sup> step: To synthesize 1-(2-bromobenzyl)-1H-indole (**s-1**) according to the literature procedure.<sup>[1]</sup>

-2<sup>nd</sup> step: To synthesize 2-((1H-indol-1-yl)methyl) benzaldehyde (**1a-1m**) according to the literature.<sup>[2]</sup>

## 2.5 General procedure for the the synthesis of 2-((1H-indol-3-yl)methyl) benzaldehyde 4a-4n.

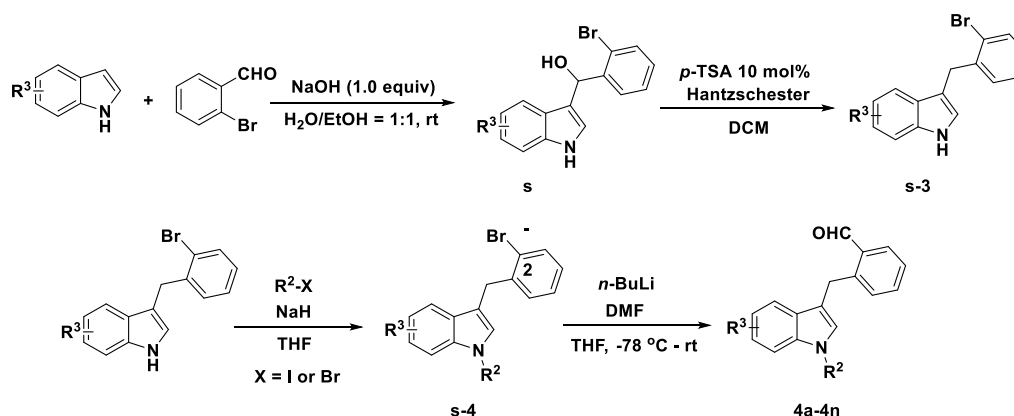

-1<sup>st</sup> step: To synthesize (2-bromophenyl)(1H-indol-3-yl)methanol (s-2) according to the literature procedure.<sup>[3]</sup>

-2<sup>nd</sup> step procedure:

To a stirred solution of (2-bromophenyl)(1H-indol-3-yl)methanol (3.63g, 12.0 mmol) in DCM (40 mL), Hantzsch esters (3.80g, 15.0 mmol) was added. Then *p*-toluenesulfonic acid monohydrate (114.0 mg, 0.6 mmol) was added to the mixture and the resultant was stirred for 4 hours. After the reaction was completed by TLC, the solvent was removed in vacuum. The residue was purified by flash column chromatography (petroleum ether/EtOAc = 5:1) on silica gel to afford 3-(2-bromobenzyl)-1H-indole (S-3) as a white solid (2461.1 mg, 86%).

-3<sup>rd</sup> step: The amine protection step was performed according to the literature procedure.<sup>[4]</sup>

-4<sup>th</sup> step: To synthesize 2-((1H-indol-3-yl)methyl) benzaldehyde according to the literature.<sup>[2]</sup>

## 2.6 General procedure for the the synthesis of 2-(indolin-1-ylmethyl)benzaldehyde 1a'.<sup>[2][5]</sup>

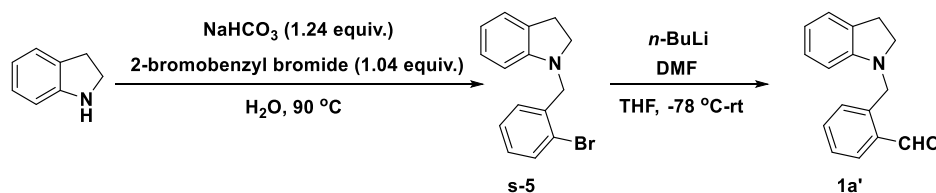

To synthesize 2-(indolin-1-ylmethyl)benzaldehyde 1a' according to the literature.<sup>[2][5]</sup>

## 2.7 Reference

- [1] N. Barbero, R. SanMartin and E. Domínguez, *Tetrahedron Lett.*, 2009, **50**, 2129.
- [2] P. D. Jadhav, X. Lu and R.-S. Liu, *ACS Catal.*, 2018, **8**, 9697.
- [3] M. L. Deb, B. Deka, P. J. Saikia and P. K. Baruah, *Tetrahedron Lett.*, 2017, **58**, 1999.
- [4] S. K. Banjare, T. Nanda and P. C. Ravikumar, *Org. Lett.*, 2019, **21**: 8138.
- [5] W.-L. Jia, N. Westerveld, K. M. Wong, T. Morsch, M. Hakkennes, K. Naksomboon and M. Á. Fernández-Ibáñez, *Org. Lett.*, 2019, **21**, 9339.

### 3. Mechanistic Study

#### 3.1 Proposed Mechanism

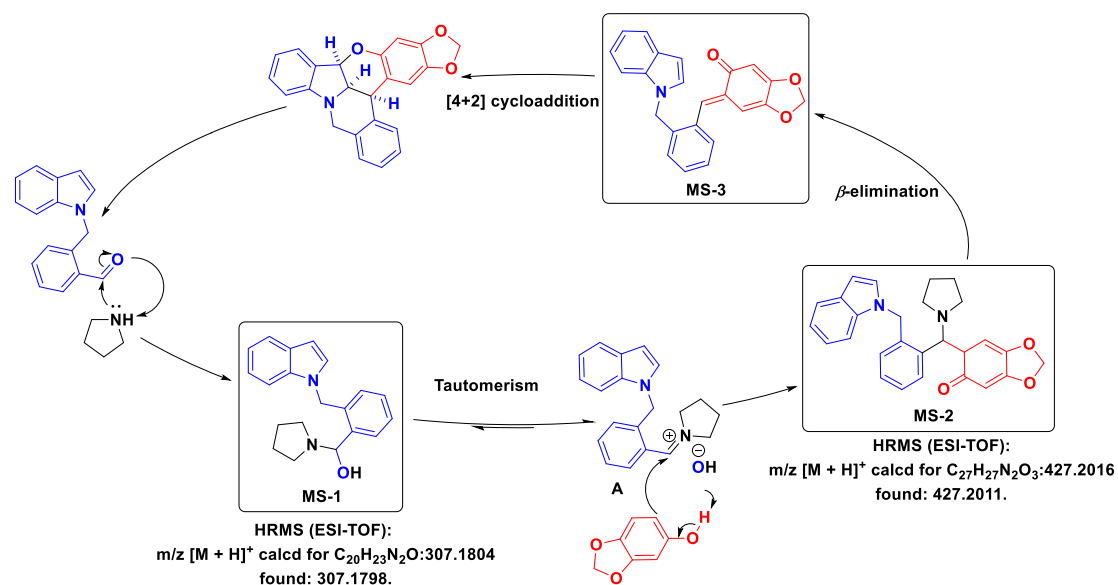

To verify the reaction mechanism, we stopped the reaction of **1a** and **2a** after 12 h under standard reaction conditions, and the reaction system was then sent to high-resolution mass spectrometry to detect the intermediates mentioned above.

#### 3.2 HRMS (ESI-TOF) Spectra data of MS-1.

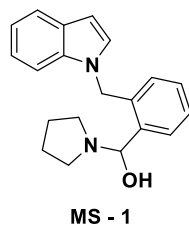

HRMS (ESI-TOF):  $m/z$   $[M + H]^+$  calcd for  $C_{20}H_{23}N_2O$ : 307.1804, found: 307.1798.

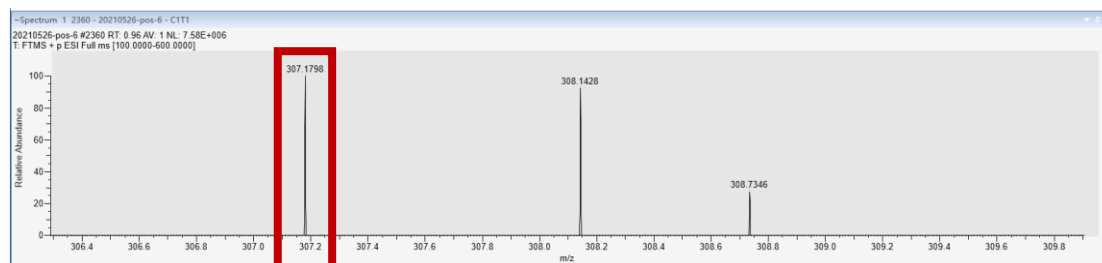

### 3.3 HRMS (ESI-TOF) Spectra data of MS-2.

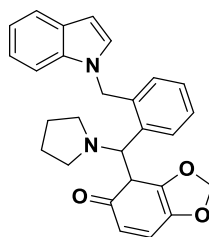

MS - 2

HRMS (ESI-TOF):  $m/z$   $[M + H]^+$  calcd for  $C_{27}H_{27}N_2O_3$ :427.2016, found: 427.2011.

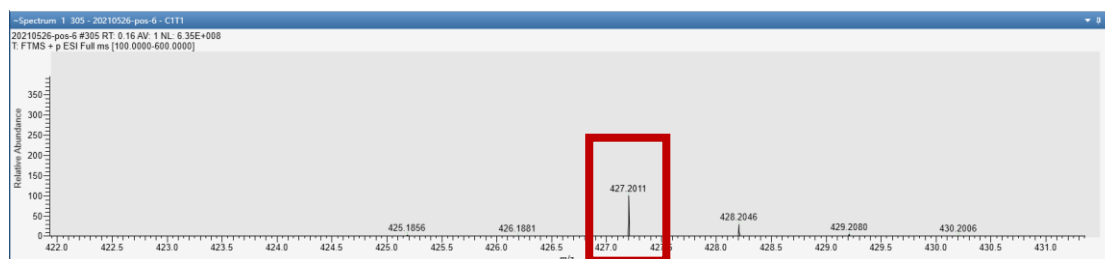

### 4. The Effect of Pyrrolidine Loading

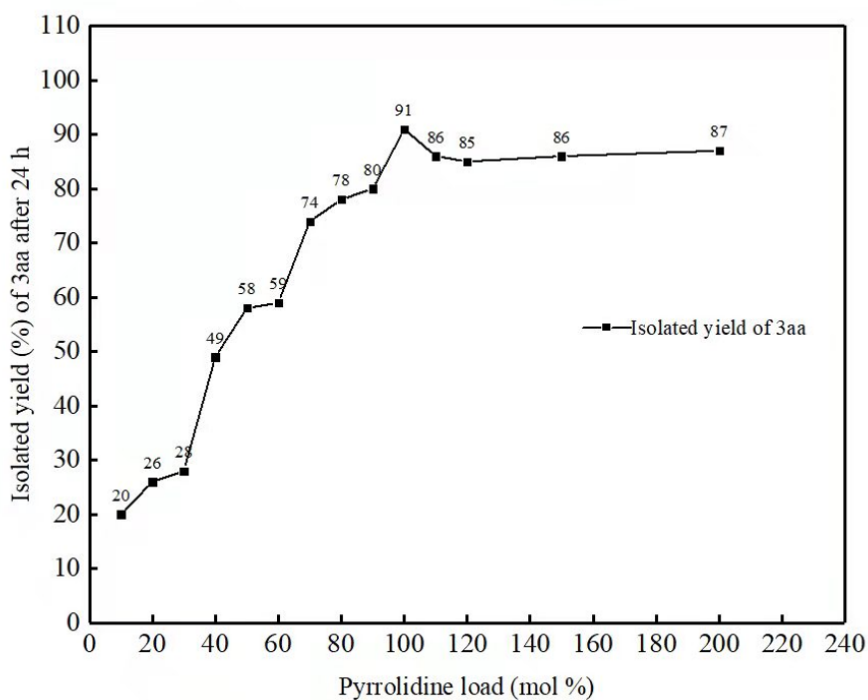

Figure 1 The effect of pyrrolidine loading on the isolated yield of 3aa



## 5. Characterization of Products

### 2-((1H-indol-1-yl) methyl) benzaldehyde (1a)

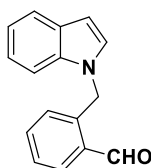

White solid; 70% yield, mp 78-80 °C; column chromatography eluent, petroleum ether/EtOAc = 30:1.  $^1\text{H NMR}$  (500 MHz,  $\text{CDCl}_3$ )  $\delta$  10.15 (s, 1H), 7.81 (d,  $J = 7.5$  Hz, 1H), 7.67 – 7.65 (m, 1H), 7.39 (t,  $J = 7.5$  Hz, 1H), 7.30 (t,  $J = 7.5$  Hz, 1H), 7.14 – 7.08 (m, 4H), 6.58 (d,  $J = 3.0$  Hz, 1H), 6.48 (d,  $J = 8.0$  Hz, 1H), 5.78 (s, 2H).  $^{13}\text{C NMR}$  (126 MHz,  $\text{CDCl}_3$ )  $\delta$  193.79, 140.21, 136.43, 135.42, 134.37, 132.92, 128.75, 128.69, 127.78, 127.18, 121.96, 121.14, 119.79, 109.75, 102.14, 47.99. HRMS (ESI-TOF):  $m/z$   $[\text{M} + \text{H}]^+$  calcd for  $\text{C}_{16}\text{H}_{14}\text{NO}$ : 236.1069, found: 236.1070.

### 2-((4-methyl-1H-indol-1-yl) methyl) benzaldehyde (1b)

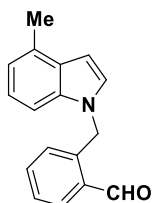

Yellow oil; 68% yield; column chromatography eluent, petroleum ether/EtOAc = 30:1.  $^1\text{H NMR}$  (500 MHz,  $\text{CDCl}_3$ )  $\delta$  10.23 (s, 1H), 7.89 (d,  $J = 7.5$  Hz, 1H), 7.47 (t,  $J = 7.5$  Hz, 1H), 7.39 (t,  $J = 7.5$  Hz, 1H), 7.15 (d,  $J = 3.0$  Hz, 1H), 7.12 – 7.08 (m, 1H), 7.04 (d,  $J = 8.0$  Hz, 1H), 6.97 (d,  $J = 7.0$  Hz, 1H), 6.65 (d,  $J = 3.0$  Hz, 1H), 6.55 (d,  $J = 8.0$  Hz, 1H), 5.84 (s, 2H), 2.63 (s, 3H).  $^{13}\text{C NMR}$  (126 MHz,  $\text{CDCl}_3$ )  $\delta$  193.70, 140.56, 136.65, 135.21, 134.28, 132.84, 128.88, 127.59, 127.22, 126.09, 121.78, 119.09, 118.93, 111.22, 109.42, 47.59, 9.67. HRMS (ESI-TOF):  $m/z$   $[\text{M} + \text{H}]^+$  calcd for  $\text{C}_{17}\text{H}_{16}\text{NO}$ : 250.1226, found: 250.1227.

### 2-((4-fluoro-1H-indol-1-yl) methyl) benzaldehyde (1c)

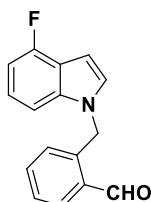

Light yellow solid; 30% yield, mp 65-66 °C; column chromatography eluent, petroleum ether/EtOAc = 30:1. **<sup>1</sup>H NMR (500 MHz, CDCl<sub>3</sub>)** δ 10.20 (s, 1H), 7.89 (dd, *J* = 7.5, 1.5 Hz, 1H), 7.49 (t, *J* = 7.5 Hz, 1H), 7.40 (td, *J* = 7.5, 1.5 Hz, 1H), 7.11 (d, *J* = 3.5 Hz, 1H), 7.07 (td, *J* = 8.0, 5.5 Hz, 1H), 6.95 (d, *J* = 8.5 Hz, 1H), 6.80 (dd, *J* = 10.5, 8.0 Hz, 1H), 6.70 (d, *J* = 3.5 Hz, 1H), 6.52 (d, *J* = 7.5 Hz, 1H), 5.83 (s, 2H). **<sup>13</sup>C NMR (126 MHz, CDCl<sub>3</sub>)** δ 193.79, 156.57 (d, *J* = 247.5 Hz, 1C), 139.63, 139.07 (d, *J* = 11.5 Hz, 1C), 135.61, 134.36, 132.88, 128.59, 127.91, 127.03, 122.43 (d, *J* = 7.9 Hz, 1C), 117.71 (d, *J* = 22.6 Hz, 1C), 105.84 (d, *J* = 3.5 Hz, 1C), 104.53 (d, *J* = 19.0 Hz, 1C), 98.18, 48.30. **<sup>19</sup>F NMR (470 MHz, CDCl<sub>3</sub>)** δ -121.80. HRMS (ESI-TOF): *m/z* [M + H]<sup>+</sup> calcd for C<sub>16</sub>H<sub>13</sub>FNO: 254.0976, found: 254.0978.

**2-((4-chloro-1H-indol-1-yl) methyl) benzaldehyde (1d)**

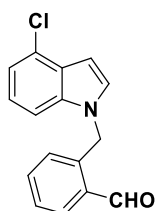

White solid; 30% yield, mp 52-54 °C; column chromatography eluent, petroleum ether/EtOAc = 30:1. **<sup>1</sup>H NMR (500 MHz, CDCl<sub>3</sub>)** δ 10.19 (s, 1H), 7.87 (dd, *J* = 7.5, 1.5 Hz, 1H), 7.47 (t, *J* = 7.5 Hz, 1H), 7.39 (td, *J* = 7.5, 1.5 Hz, 1H), 7.16 (d, *J* = 3.5 Hz, 1H), 7.13 – 7.11 (m, 1H), 7.08 – 7.04 (m, 2H), 6.71 (d, *J* = 3.0 Hz, 1H), 6.49 (d, *J* = 8.0 Hz, 1H), 5.82 (s, 2H). **<sup>13</sup>C NMR (126 MHz, CDCl<sub>3</sub>)** δ 193.78, 139.53, 137.09, 135.61, 134.34, 132.80, 129.18, 127.89, 127.38, 126.97, 126.29, 122.47, 119.50, 108.36, 100.72, 48.29. HRMS (ESI-TOF): *m/z* [M + H]<sup>+</sup> calcd for C<sub>16</sub>H<sub>13</sub>ClNO: 270.0680, found: 270.0682.

**2-((5-methyl-1H-indol-1-yl) methyl) benzaldehyde (1e)**

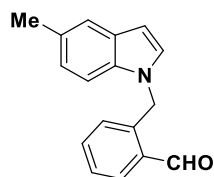

Light yellow solid; 80% yield, mp 86-87 °C; column chromatography eluent, petroleum ether/EtOAc = 30:1. **<sup>1</sup>H NMR (500 MHz, CDCl<sub>3</sub>)** δ 10.18 (s, 1H), 7.84 (d, *J* = 7.5 Hz,

1H), 7.43 (t,  $J = 7.5$  Hz, 1H), 7.35 (t,  $J = 8.0$  Hz, 1H), 7.10 (d,  $J = 3.0$  Hz, 1H), 7.06 (t,  $J = 7.5$  Hz, 1H), 6.99 (d,  $J = 8.5$  Hz, 1H), 6.92 (d,  $J = 7.0$  Hz, 1H), 6.61 (d,  $J = 3.0$  Hz, 1H), 6.51 (d,  $J = 7.5$  Hz, 1H), 5.80 (s, 2H), 2.59 (s, 3H).  $^{13}\text{C}$  NMR (126 MHz,  $\text{CDCl}_3$ )  $\delta$  193.71, 140.22, 136.05, 135.28, 134.27, 132.79, 130.47, 128.51, 127.92, 127.63, 127.09, 121.99, 119.89, 107.26, 100.49, 48.02, 18.73. HRMS (ESI-TOF):  $m/z$   $[\text{M} + \text{H}]^+$  calcd for  $\text{C}_{17}\text{H}_{16}\text{NO}$ : 250.1226, found: 250.1227.

**2-((5-methoxy-1H-indol-1-yl) methyl) benzaldehyde (1f)**

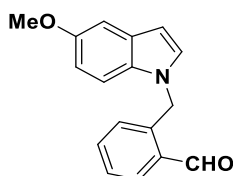

White solid; 84% yield, mp 82-84 °C; column chromatography eluent, petroleum ether/EtOAc = 30:1.  $^1\text{H}$  NMR (500 MHz,  $\text{CDCl}_3$ )  $\delta$  10.20 (s, 1H), 7.87 (dd,  $J = 7.5$ , 1.0 Hz, 1H), 7.45 (t,  $J = 7.5$  Hz, 1H), 7.38 (td,  $J = 7.5$ , 1.5 Hz, 1H), 7.14 (d,  $J = 2.5$  Hz, 1H), 7.10 (d,  $J = 3.0$  Hz, 1H), 7.04 (d,  $J = 8.5$  Hz, 1H), 6.81 (dd,  $J = 8.5$ , 2.0 Hz, 1H), 6.52 – 6.50 (m, 2H), 5.78 (s, 2H), 3.85 (s, 3H).  $^{13}\text{C}$  NMR (126 MHz,  $\text{CDCl}_3$ )  $\delta$  193.73 (d,  $J = 3.2$  Hz, 1C), 154.21, 140.32, 135.34, 134.31, 132.81, 131.63, 129.13, 129.02, 127.69, 127.08, 112.19, 110.42, 102.61, 101.56, 55.81, 48.12. HRMS (ESI-TOF):  $m/z$   $[\text{M} + \text{H}]^+$  calcd for  $\text{C}_{17}\text{H}_{16}\text{NO}_2$ : 266.1176, found: 266.1177.

**2-((5-fluoro-1H-indol-1-yl) methyl) benzaldehyde (1g)**

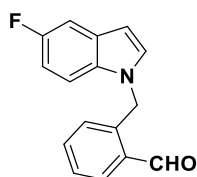

Yellow oil; 45% yield; column chromatography eluent, petroleum ether/EtOAc = 30:1.  $^1\text{H}$  NMR (500 MHz,  $\text{CDCl}_3$ )  $\delta$  10.19 (s, 1H), 7.87 (dd,  $J = 7.5$ , 1.5 Hz, 1H), 7.47 (t,  $J = 7.5$  Hz, 1H), 7.39 (td,  $J = 7.5$ , 1.5 Hz, 1H), 7.30 (dd,  $J = 12.5$ , 2.5 Hz, 1H), 7.16 (d,  $J = 3.5$  Hz, 1H), 7.05 (dd,  $J = 9.0$ , 4.0 Hz, 1H), 6.88 (td,  $J = 9.0$ , 2.5 Hz, 1H), 6.55 (d,  $J = 3.0$  Hz, 1H), 6.49 (d,  $J = 8.0$  Hz, 1H), 5.80 (s, 2H).  $^{13}\text{C}$  NMR (126 MHz,  $\text{CDCl}_3$ )  $\delta$  193.76 (d,  $J = 1.8$  Hz, 1C), 158.92, 157.06, 139.82, 135.54, 134.32, 132.89 (d,  $J = 15.1$  Hz, 1C), 130.20, 128.87 (d,  $J = 10.1$  Hz, 1C), 127.84, 126.99, 110.35 (d,  $J = 6.2$  Hz,

1C), 110.21 (d,  $J = 10.3$  Hz, 1C), 105.75 (d,  $J = 23.7$  Hz, 1C), 101.96 (d,  $J = 4.5$  Hz, 1C), 48.21.  $^{19}\text{F}$  NMR (470 MHz,  $\text{CDCl}_3$ )  $\delta$  -124.99. HRMS (ESI-TOF):  $m/z$   $[\text{M} + \text{H}]^+$  calcd for  $\text{C}_{16}\text{H}_{13}\text{FNO}$ : 254.0976, found: 254.0979.

**2-((5-chloro-1H-indol-1-yl) methyl) benzaldehyde (1h)**

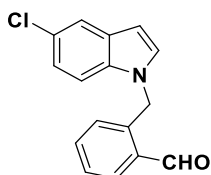

White solid; 35% yield, mp 80-83 °C; column chromatography eluent, petroleum ether/EtOAc = 30:1.  $^1\text{H}$  NMR (500 MHz,  $\text{CDCl}_3$ )  $\delta$  10.01 (s, 1H), 7.69 (dd,  $J = 7.5$ , 1.5 Hz, 1H), 7.48 – 7.47 (m, 1H), 7.30 (td,  $J = 7.5$ , 1.0 Hz, 1H), 7.20 (td,  $J = 7.5$ , 1.5 Hz, 1H), 6.98 (d,  $J = 3.5$  Hz, 1H), 6.94 – 6.90 (m, 2H), 6.38 (dd,  $J = 3.5$ , 1.0 Hz, 1H), 6.34 (d,  $J = 8.0$  Hz, 1H), 5.63 (s, 2H).  $^{13}\text{C}$  NMR (126 MHz,  $\text{CDCl}_3$ )  $\delta$  193.87, 139.71, 135.71, 134.97, 134.47, 133.05, 130.19, 129.86, 128.10, 127.19, 125.64, 122.34, 120.61, 110.93, 101.91, 48.27. HRMS (ESI-TOF):  $m/z$   $[\text{M} + \text{H}]^+$  calcd for  $\text{C}_{16}\text{H}_{13}\text{ClNO}$ : 270.0680, found: 270.0683.

**2-((6-fluoro-1H-indol-1-yl) methyl) benzaldehyde (1i)**

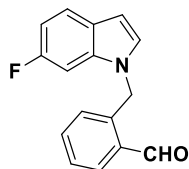

Light yellow solid; 43% yield, mp 55-56 °C; column chromatography eluent, petroleum ether/EtOAc = 30:1.  $^1\text{H}$  NMR (500 MHz,  $\text{CDCl}_3$ )  $\delta$  10.19 (s, 1H), 7.87 (dd,  $J = 7.5$ , 1.5 Hz, 1H), 7.47 (t,  $J = 7.5$  Hz, 1H), 7.39 (td,  $J = 7.5$ , 1.5 Hz, 1H), 7.30 (dd,  $J = 10.0$ , 2.5 Hz, 1H), 7.16 (d,  $J = 3.5$  Hz, 1H), 7.05 (dd,  $J = 9.0$ , 4.0 Hz, 1H), 6.88 (td,  $J = 9.0$ , 2.5 Hz, 1H), 6.55 (d,  $J = 3.0$  Hz, 1H), 6.49 (d,  $J = 8.0$  Hz, 1H), 5.80 (s, 2H).  $^{13}\text{C}$  NMR (126 MHz,  $\text{CDCl}_3$ )  $\delta$  193.76 (d,  $J = 1.76$  Hz, 1C), 158.92, 157.06, 139.82, 135.54, 134.32, 132.89 (d,  $J = 15.1$  Hz, 1C), 130.20, 128.87 (d,  $J = 10.1$  Hz, 1C), 127.84, 126.99, 110.35 (d,  $J = 6.2$  Hz, 1C), 110.21 (d,  $J = 10.3$  Hz, 1C), 105.75 (d,  $J = 23.7$  Hz, 1C), 101.96 (d,  $J = 4.5$  Hz, 1C), 48.21.  $^{19}\text{F}$  NMR (470 MHz,  $\text{CDCl}_3$ )  $\delta$  -120.54. HRMS (ESI-TOF):  $m/z$   $[\text{M} + \text{H}]^+$  calcd for  $\text{C}_{16}\text{H}_{13}\text{FNO}$ : 254.0976, found: 254.0979.

**2-((6-methoxy-1H-indol-1-yl) methyl) benzaldehyde (1j)**

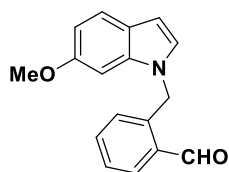

Yellow oil, 70% yield; column chromatography eluent, petroleum ether/EtOAc = 30:1. **<sup>1</sup>H NMR (500 MHz, CDCl<sub>3</sub>)** δ 9.94 (s, 1H), 7.59 (dd, *J* = 7.5, 1.5 Hz, 1H), 7.36 (d, *J* = 8.5 Hz, 1H), 7.20 (td, *J* = 7.5, 1.0 Hz, 1H), 7.13 (td, *J* = 7.5, 1.5 Hz, 1H), 6.80 (d, *J* = 3.0 Hz, 1H), 6.62 (dd, *J* = 8.5, 2.0 Hz, 1H), 6.46 (d, *J* = 2.5 Hz, 1H), 6.36 – 6.34 (m, 2H), 5.54 (s, 2H), 3.53 (s, 3H). **<sup>13</sup>C NMR (126 MHz, CDCl<sub>3</sub>)** δ 193.59 (d, *J* = 1.8 Hz, 1C), 156.36, 139.91, 137.05, 135.16, 134.14, 132.77, 127.57, 127.42, 126.98, 122.81, 121.52, 109.54, 101.91, 93.14, 55.45, 47.69. HRMS (ESI-TOF): *m/z* [M + H]<sup>+</sup> calcd for C<sub>17</sub>H<sub>16</sub>NO<sub>2</sub>: 266.1176, found: 266.1179.

**2-((2-methyl-1H-indol-1-yl) methyl) benzaldehyde (1k)**

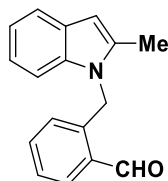

Yellow oil; 65% yield; column chromatography eluent, petroleum ether/EtOAc = 30:1. **<sup>1</sup>H NMR (500 MHz, CDCl<sub>3</sub>)** δ 10.03 (s, 1H), 7.63 (dd, *J* = 8.0, 1.5 Hz, 1H), 7.53 (dd, *J* = 7.5, 1.5 Hz, 1H), 7.20 (td, *J* = 7.0, 1.0 Hz, 1H), 7.07 (td, *J* = 7.6, 1.5 Hz, 1H), 7.04 – 7.00 (m, 1H), 6.98 – 6.96 (m, 2H), 6.32 (s, 1H), 6.22 (d, *J* = 8.0 Hz, 1H), 5.67 (s, 2H), 2.16 (s, 3H). **<sup>13</sup>C NMR (126 MHz, CDCl<sub>3</sub>)** δ 194.04, 140.56, 137.41, 136.94, 135.72, 134.51, 133.07, 128.60, 127.68, 126.50, 121.18, 120.14, 120.02, 109.42, 101.03, 44.82, 12.64. HRMS (ESI-TOF): *m/z* [M + H]<sup>+</sup> calcd for C<sub>17</sub>H<sub>16</sub>NO: 250.1226, found: 250.1228.

**2-((3-methyl-1H-indol-1-yl) methyl) benzaldehyde (1l)**

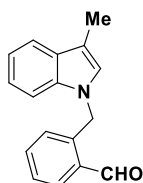

White solid; 62% yield, mp 79-81 °C; column chromatography eluent, petroleum

ether/EtOAc = 30:1. **<sup>1</sup>H NMR (500 MHz, CDCl<sub>3</sub>)** δ 10.22 (s, 1H), 7.88 (d, *J* = 7.5 Hz, 1H), 7.65 – 7.62 (m, 1H), 7.46 (t, *J* = 7.5 Hz, 1H), 7.39 (t, *J* = 7.5 Hz, 1H), 7.16 – 7.13 (m, 3H), 6.90 (s, 1H), 6.56 (d, *J* = 7.5 Hz, 1H), 5.77 (s, 2H), 2.38 (s, 3H). **<sup>13</sup>C NMR (126 MHz, CDCl<sub>3</sub>)** δ 194.75, 141.05, 136.68, 135.24, 134.31, 132.87, 128.91, 127.63, 127.26, 126.13, 121.81, 119.12, 118.97, 111.25, 109.46, 47.63, 9.71. HRMS (ESI-TOF): *m/z* [M + H]<sup>+</sup> calcd for C<sub>17</sub>H<sub>16</sub>NO: 250.1226, found: 250.1228.

**2-((2,3-dimethyl-1H-indol-1-yl) methyl) benzaldehyde (1m)**

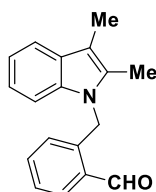

Yellow solid; 66% yield, mp 90-91 °C; column chromatography eluent, petroleum ether/EtOAc = 30:1. **<sup>1</sup>H NMR (500 MHz, CDCl<sub>3</sub>)** δ 10.26 (s, 1H), 7.89 (d, *J* = 7.5 Hz, 1H), 7.59 (dd, *J* = 7.5, 4.0 Hz, 1H), 7.45 (t, *J* = 7.5 Hz, 1H), 7.35 (t, *J* = 7.5 Hz, 1H), 7.15 – 7.10 (m, 3H), 6.33 (dd, *J* = 8.0, 3.5 Hz, 1H), 5.78 (d, *J* = 3.0 Hz, 2H), 2.35 (d, *J* = 4.0 Hz, 3H), 2.25 (d, *J* = 3.0 Hz, 3H). **<sup>13</sup>C NMR (126 MHz, CDCl<sub>3</sub>)** δ 194.06, 140.91, 136.31, 135.67, 134.48, 132.80, 132.47, 128.79, 127.43, 126.51, 120.93, 119.06, 118.12, 108.80, 107.27, 44.81, 9.97, 9.00. HRMS (ESI-TOF): *m/z* [M + H]<sup>+</sup> calcd for C<sub>18</sub>H<sub>18</sub>NO: 264.1383, found: 264.1387.

**2-(indolin-1-ylmethyl) benzaldehyde (1a')**

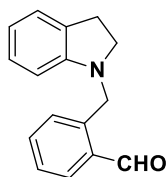

Yellow solid; 89% yield, mp 81-82 °C; column chromatography eluent, petroleum ether/EtOAc = 30:1. **<sup>1</sup>H NMR (500 MHz, CDCl<sub>3</sub>)** δ 10.29 (s, 1H), 7.87 (dd, *J* = 7.5, 1.5 Hz, 1H), 7.58 – 7.53 (m, 2H), 7.46 (td, *J* = 7.5, 1.5 Hz, 1H), 7.10 (dd, *J* = 7.5, 1.5 Hz, 1H), 7.03 (td, *J* = 8.0, 1.5 Hz, 1H), 6.69 (td, *J* = 7.5, 1.0 Hz, 1H), 6.44 (d, *J* = 8.0 Hz, 1H), 4.63 (s, 2H), 3.34 (t, *J* = 8.5 Hz, 2H), 2.98 (t, *J* = 8.5 Hz, 2H). **<sup>13</sup>C NMR (126 MHz, CDCl<sub>3</sub>)** δ 192.80, 152.18, 141.16, 134.03, 133.80, 132.46, 129.89, 129.00, 127.59, 127.32, 124.51, 118.10, 106.98, 54.07, 51.63, 28.58. HRMS (ESI-TOF): *m/z*

$[M + H]^+$  calcd for  $C_{23}H_{20}NO$ : 238.1226, found: 238.1226.

**2-((1-butyl-1H-indol-3-yl) methyl) benzaldehyde (4a)**

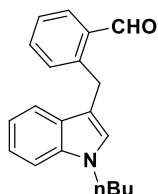

Yellow oil; 63% yield; column chromatography eluent, petroleum ether/EtOAc = 30:1.

$^1H$  NMR (500 MHz,  $CDCl_3$ )  $\delta$  10.27 (s, 1H), 7.84 – 7.82 (m, 1H), 7.51 (d,  $J = 7.5$  Hz, 1H), 7.41 (td,  $J = 7.5, 1.5$  Hz, 1H), 7.313 – 7.285 (m, 2H), 7.26 (d,  $J = 8.0$  Hz, 1H), 7.17 (t,  $J = 7.5$  Hz, 1H), 7.05 (t,  $J = 7.5$  Hz, 1H), 6.61 (s, 1H), 4.46 (s, 2H), 3.92 (t,  $J = 7.5$  Hz, 2H), 1.67 (p,  $J = 14.5, 7.0$  Hz, 2H), 1.23 (h,  $J = 14.5, 7.0$  Hz, 2H), 0.85 (t,  $J = 7.0$  Hz, 3H).  $^{13}C$  NMR (126 MHz,  $CDCl_3$ )  $\delta$  191.27 (d,  $J = 2.0$  Hz, 1C), 142.68, 135.35, 132.89, 132.86, 130.04, 129.65, 126.47, 125.68, 125.50, 120.59, 117.94, 117.82, 112.88, 108.42, 44.89, 31.25, 27.18, 19.08, 12.63. HRMS (ESI-TOF):  $m/z$   $[M + H]^+$  calcd for  $C_{20}H_{22}NO$ : 292.1696, found: 292.1698.

**2-((1-benzyl-1H-indol-3-yl) methyl) benzaldehyde (4b)**

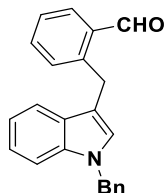

White solid; 72% yield, mp 81-83 °C; column chromatography eluent, petroleum ether/EtOAc = 30:1.  $^1H$  NMR (500 MHz,  $CDCl_3$ )  $\delta$  10.24 (s, 1H), 7.80 (dd,  $J = 7.5, 1.5$  Hz, 1H), 7.47 (d,  $J = 8.0$  Hz, 1H), 7.41 (td,  $J = 7.5, 1.5$  Hz, 1H), 7.29 (dd,  $J = 9.5, 8.0$  Hz, 2H), 7.20 – 7.12 (m, 4H), 7.10 – 7.07 (m, 1H), 7.03 – 6.99 (m, 1H), 6.97 – 6.95 (m, 2H), 6.63 (s, 1H), 5.14 (s, 2H), 4.46 (s, 2H).  $^{13}C$  NMR (126 MHz,  $CDCl_3$ )  $\delta$  191.86 (d,  $J = 3.0$  Hz, 1C), 143.11, 137.12, 136.35, 133.53, 133.46, 130.64, 130.52, 128.27, 127.37, 127.35, 127.08, 126.60, 126.34, 126.17, 121.62, 118.85, 118.66, 114.30, 109.40, 109.39, 49.47, 27.82. HRMS (ESI-TOF):  $m/z$   $[M + H]^+$  calcd for  $C_{23}H_{20}NO$ : 326.1539, found: 326.1541.

**2-((1-methyl-1H-indol-3-yl) methyl) benzaldehyde (4c)**

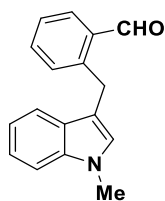

Yellow solid; 70% yield, mp 67-68 °C; column chromatography eluent, petroleum ether/EtOAc = 30:1. **<sup>1</sup>H NMR (500 MHz, CDCl<sub>3</sub>)** δ 10.06 (s, 1H), 7.64 (dd, *J* = 8.5, 1.5 Hz, 1H), 7.34 (d, *J* = 8.0 Hz, 1H), 7.21 (td, *J* = 7.5, 2.0 Hz, 1H), 7.12 – 7.09 (m, 2H), 7.02 – 7.01 (m, 2H), 6.90 (dt, *J* = 8.0, 4.0 Hz, 1H), 6.33 (s, 1H), 4.25 (s, 2H), 3.31 (s, 3H). **<sup>13</sup>C NMR (126 MHz, CDCl<sub>3</sub>)** δ 191.17, 142.52, 135.92, 132.71, 129.94, 129.65, 126.34, 126.30, 125.56, 120.64, 120.63, 117.82, 117.76, 112.83, 108.14, 31.23, 26.93. HRMS (ESI-TOF): *m/z* [M + H]<sup>+</sup> calcd for C<sub>17</sub>H<sub>16</sub>NO: 250.1226, found: 250.1228.

**2-((1-allyl-1H-indol-3-yl) methyl) benzaldehyde (4d)**

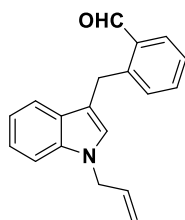

Yellow oil; 63% yield; column chromatography eluent, petroleum ether/EtOAc = 30:1. **<sup>1</sup>H NMR (500 MHz, CDCl<sub>3</sub>)** δ 10.24 (s, 1H), 7.81 (d, *J* = 8.0 Hz, 1H), 7.50 (d, *J* = 8.0 Hz, 1H), 7.39 (t, *J* = 8.0 Hz, 1H), 7.30 – 7.27 (m, 2H), 7.22 (d, *J* = 8.0 Hz, 1H), 7.15 (t, *J* = 7.5 Hz, 1H), 7.05 (t, *J* = 7.5 Hz, 1H), 6.59 (s, 1H), 5.83 (ddt, *J* = 16.0, 10.5, 5.5 Hz, 1H), 5.06 (d, *J* = 10.0 Hz, 1H), 4.95 (d, *J* = 17.0 Hz, 1H), 4.49 (d, *J* = 5.5 Hz, 2H), 4.45 (s, 2H). **<sup>13</sup>C NMR (126 MHz, CDCl<sub>3</sub>)** δ 192.38, 143.77, 136.76, 134.16, 134.00, 133.67, 131.24, 131.03, 127.92, 126.89, 126.69, 122.05, 119.35, 119.21, 117.19, 114.62, 109.87, 48.74, 28.33. HRMS (ESI-TOF): *m/z* [M + Na]<sup>+</sup> calcd for C<sub>19</sub>H<sub>17</sub>NNaO: 298.1202, found: 298.1205.

**2-((1-(cyclopropylmethyl)-1H-indol-3-yl) methyl) benzaldehyde (4e)**



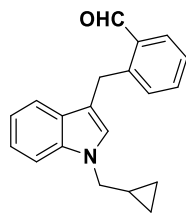

Yellow oil; 59% yield; column chromatography eluent, petroleum ether/EtOAc = 30:1. <sup>1</sup>H NMR (500 MHz, CDCl<sub>3</sub>) δ 10.27 (s, 1H), 7.82 (d, *J* = 7.5 Hz, 1H), 7.50 (d, *J* = 8.0 Hz, 1H), 7.40 (t, *J* = 7.5 Hz, 1H), 7.31 – 7.26 (m, 3H), 7.16 (t, *J* = 7.0 Hz, 1H), 7.04 (t, *J* = 7.5 Hz, 1H), 6.71 (s, 1H), 4.46 (s, 2H), 3.77 (d, *J* = 7.0 Hz, 2H), 0.47 (t, *J* = 6.0 Hz, 2H), 0.21 (t, *J* = 5.0 Hz, 2H). <sup>13</sup>C NMR (126 MHz, CDCl<sub>3</sub>) δ 192.47, 143.90, 136.76, 134.12, 134.05, 131.25, 130.94, 127.75, 126.89, 126.51, 121.88, 119.18, 119.15, 114.14, 109.70, 50.57, 28.42, 11.48, 4.18 (s, 2C). HRMS (ESI-TOF): *m/z* [M + Na]<sup>+</sup> calcd for C<sub>20</sub>H<sub>19</sub>NNaO: 312.1359, found: 312.1366.

**2-((1-benzyl-2-methyl-1H-indol-3-yl)methyl) benzaldehyde (4f)**

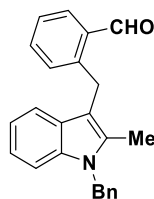

Yellow oil; 30% yield; column chromatography eluent, petroleum ether/EtOAc = 30:1. <sup>1</sup>H NMR (500 MHz, CDCl<sub>3</sub>) δ 10.38 (s, 1H), 7.82 (dd, *J* = 7.4, 1.7 Hz, 1H), 7.37 (td, *J* = 7.5, 1.5 Hz, 1H), 7.31 (dd, *J* = 16.0, 7.0 Hz, 2H), 7.27 – 7.19 (m, 5H), 7.14 (d, *J* = 7.5 Hz, 1H), 7.09 (t, *J* = 7.5 Hz, 1H), 7.00 (t, *J* = 7.5 Hz, 1H), 6.95 (d, *J* = 8.0 Hz, 2H), 5.31 (s, 2H), 4.58 (s, 2H), 2.23 (s, 3H). <sup>13</sup>C NMR (126 MHz, CDCl<sub>3</sub>) δ 193.02, 144.10, 138.06, 136.85, 134.06, 133.95, 133.86, 132.36, 130.13, 128.88 (s, 2C), 128.25, 127.38, 126.44, 126.04 (s, 2C), 121.20, 119.43, 118.43, 109.50, 109.22, 46.68, 27.27, 10.44. HRMS (ESI-TOF): *m/z* [M + Na]<sup>+</sup> calcd for C<sub>24</sub>H<sub>21</sub>NNaO: 362.1515, found: 362.1516.

**2-((1-benzyl-4-methyl-1H-indol-3-yl)methyl) benzaldehyde (4g)**

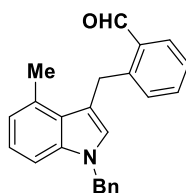

White solid; 55% yield, mp 99-101 °C; column chromatography eluent, petroleum

ether/EtOAc = 30:1.  $^1\text{H NMR}$  (500 MHz,  $\text{CDCl}_3$ )  $\delta$  10.26 (s, 1H), 7.85 (d,  $J = 7.5$  Hz, 1H), 7.39 (t,  $J = 7.5$  Hz, 1H), 7.31 (t,  $J = 7.5$  Hz, 1H), 7.22 – 7.16 (m, 4H), 7.05 – 7.00 (m, 2H), 6.97 (d,  $J = 7.5$  Hz, 2H), 6.79 (d,  $J = 6.5$  Hz, 1H), 6.47 (s, 1H), 5.09 (s, 2H), 4.69 (s, 2H), 2.54 (s, 3H).  $^{13}\text{C NMR}$  (126 MHz,  $\text{CDCl}_3$ )  $\delta$  192.30 (d,  $J = 1.8$  Hz, 1C), 144.11, 137.50, 137.26, 133.96, 133.60, 131.08, 131.00, 130.67, 128.61 (s, 2C), 127.64, 127.38, 126.62, 126.47, 126.44 (s, 2C), 122.10, 120.89, 114.90, 107.75, 49.77, 30.22, 19.99. HRMS (ESI-TOF):  $m/z$   $[\text{M} + \text{Na}]^+$  calcd for  $\text{C}_{24}\text{H}_{21}\text{NNaO}$ : 362.1515, found: 362.1517.

**2-((1-benzyl-4-fluoro-1H-indol-3-yl) methyl) benzaldehyde (4h)**

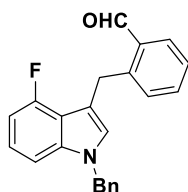

Yellow oil; 35% yield; column chromatography eluent, petroleum ether/EtOAc = 30:1.  $^1\text{H NMR}$  (500 MHz,  $\text{CDCl}_3$ )  $\delta$  10.22 (s, 1H), 7.76 (d,  $J = 7.0$  Hz, 1H), 7.37 (t,  $J = 7.5$  Hz, 1H), 7.26 – 7.23 (m, 2H), 7.18 – 7.11 (m, 4H), 6.90 (d,  $J = 8.0$  Hz, 2H), 6.86 (d,  $J = 8.5$  Hz, 1H), 6.62 (dd,  $J = 11.5, 8.0$  Hz, 1H), 6.47 (s, 1H), 5.04 (s, 2H), 4.54 (s, 2H).  $^{13}\text{C NMR}$  (126 MHz,  $\text{CDCl}_3$ )  $\delta$  191.23, 157.36, 155.40, 142.70, 138.48 (d,  $J = 11.6$  Hz, 1C), 136.04, 132.87, 130.00, 129.70, 127.73 (s, 2C), 126.63, 126.15, 125.72, 125.51 (s, 2C), 121.49 (d,  $J = 8.1$  Hz, 1C), 112.63 (d,  $J = 3.3$  Hz, 1C), 104.93 (d,  $J = 3.8$  Hz, 1C), 103.59, 103.43, 49.20, 28.00 (d,  $J = 1.9$  Hz, 1C).  $^{19}\text{F NMR}$  (470 MHz,  $\text{CDCl}_3$ )  $\delta$  -123.16. HRMS (ESI-TOF):  $m/z$   $[\text{M} + \text{Na}]^+$  calcd for  $\text{C}_{23}\text{H}_{18}\text{FNNaO}$ : 366.1265, found: 366.1262.

**2-((1-benzyl-4-chloro-1H-indol-3-yl) methyl) benzaldehyde (4i)**

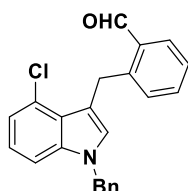

Yellow oil; 31% yield; column chromatography eluent, petroleum ether/EtOAc = 30:1.  $^1\text{H NMR}$  (500 MHz,  $\text{CDCl}_3$ )  $\delta$  10.30 (s, 1H), 7.87 (dd,  $J = 8.0, 1.5$  Hz, 1H), 7.44 (td,  $J = 7.5, 1.5$  Hz, 1H), 7.34 (t,  $J = 7.5$  Hz, 1H), 7.25 – 7.18 (m, 4H), 7.07 (d,  $J = 7.5$  Hz,

1H), 7.03 – 6.99 (m, 2H), 6.96 (d,  $J = 7.5$  Hz, 2H), 6.50 (s, 1H), 5.11 (s, 2H), 4.81 (s, 2H).  $^{13}\text{C}$  NMR (126 MHz,  $\text{CDCl}_3$ )  $\delta$  192.36, 144.05, 138.32, 137.05, 134.15, 133.88, 131.08, 130.49, 128.89 (s, 2C), 128.84, 127.79, 126.87, 126.82, 126.54 (s, 2C), 124.63, 122.72, 120.45, 115.29, 108.84, 50.22, 29.57. HRMS (ESI-TOF):  $m/z$   $[\text{M} + \text{Na}]^+$  calcd for  $\text{C}_{23}\text{H}_{18}\text{ClNNaO}$ : 382.0969, found: 382.0969.

**2-((1-benzyl-5-methoxy-1H-indol-3-yl) methyl) benzaldehyde (4j)**

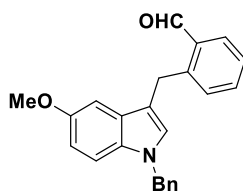

Yellow solid; 77% yield, mp 65-67 °C; column chromatography eluent, petroleum ether/EtOAc = 30:1.  $^1\text{H}$  NMR (500 MHz,  $\text{CDCl}_3$ )  $\delta$  10.28 (s, 1H), 7.83 (d,  $J = 7.5$  Hz, 1H), 7.44 – 7.41 (m, 1H), 7.33 – 7.30 (m, 2H), 7.22 – 7.16 (m, 3H), 7.06 (d,  $J = 9.0$  Hz, 1H), 6.99 – 6.96 (m, 3H), 6.79 (dd,  $J = 9.0, 2.5$  Hz, 1H), 6.65 (s, 1H), 5.08 (s, 2H), 4.46 (s, 2H), 3.75 (s, 3H).  $^{13}\text{C}$  NMR (126 MHz,  $\text{CDCl}_3$ )  $\delta$  192.39, 154.15, 143.65, 137.81, 134.15, 133.96, 132.23, 131.15, 131.08, 128.80 (s, 2C), 128.30, 127.79, 127.61, 126.88, 126.68 (s, 2C), 114.26, 112.22, 110.76, 101.27, 55.96, 50.20, 28.41. HRMS (ESI-TOF):  $m/z$   $[\text{M} + \text{Na}]^+$  calcd for  $\text{C}_{24}\text{H}_{21}\text{NNaO}_2$ : 378.1465, found: 378.1463.

**2-((1-benzyl-5-fluoro-1H-indol-3-yl) methyl) benzaldehyde (4k)**

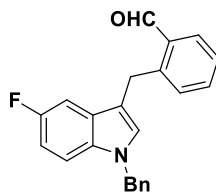

Yellow oil; 59% yield; column chromatography eluent, petroleum ether/EtOAc = 30:1.  $^1\text{H}$  NMR (500 MHz,  $\text{CDCl}_3$ )  $\delta$  10.23 (s, 1H), 7.80 (d,  $J = 7.5$  Hz, 1H), 7.41 (td,  $J = 7.5, 1.5$  Hz, 1H), 7.32 – 7.29 (m, 2H), 7.22 – 7.17 (m, 3H), 7.14 (dd,  $J = 9.5, 2.5$  Hz, 1H), 7.05 (dd,  $J = 8.5, 4.0$  Hz, 1H), 6.97 (d,  $J = 7.5$  Hz, 2H), 6.83 (td,  $J = 9.5, 2.5$  Hz, 1H), 6.75 (s, 1H), 5.09 (s, 2H), 4.42 (s, 2H).  $^{13}\text{C}$  NMR (126 MHz,  $\text{CDCl}_3$ )  $\delta$  192.50, 158.80, 156.93, 143.25, 137.44, 134.06, 133.45, 131.70, 131.13, 128.90 (s, 2C), 128.87, 128.23 (d,  $J = 9.7$  Hz, 1C), 127.78, 127.03, 126.69 (s, 2C), 114.64 (d,  $J = 5.0$  Hz, 1C), 110.74 (d,  $J = 9.5$  Hz, 1C), 110.46 (d,  $J = 26.3$  Hz, 1C), 104.19 (d,  $J = 23.9$  Hz, 1C),

50.29, 28.39.  $^{19}\text{F}$  NMR (470 MHz,  $\text{CDCl}_3$ )  $\delta$  -119.72. HRMS (ESI-TOF):  $m/z$   $[\text{M} + \text{Na}]^+$  calcd for  $\text{C}_{23}\text{H}_{18}\text{FNNaO}$ : 366.1265, found: 366.1263.

**2-((1-benzyl-5-chloro-1H-indol-3-yl) methyl) benzaldehyde (4l)**

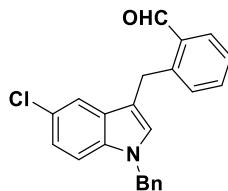

Yellow solid; 46% yield, mp 93-95 °C; column chromatography eluent, petroleum ether/EtOAc = 30:1.  $^1\text{H}$  NMR (500 MHz,  $\text{CDCl}_3$ )  $\delta$  10.26 (s, 1H), 7.85 (dd,  $J$  = 8.0, 1.5 Hz, 1H), 7.49 – 7.46 (m, 2H), 7.37 (t,  $J$  = 7.5 Hz, 1H), 7.32 (d,  $J$  = 8.0 Hz, 1H), 7.27 – 7.21 (m, 3H), 7.11 – 7.06 (m, 2H), 7.00 (d,  $J$  = 6.5 Hz, 2H), 6.74 (s, 1H), 5.16 (s, 2H), 4.46 (s, 2H).  $^{13}\text{C}$  NMR (126 MHz,  $\text{CDCl}_3$ )  $\delta$  192.37, 142.95, 137.07, 135.07, 133.95, 133.83, 131.67, 130.94, 128.81, 128.77 (s, 2C), 128.39, 127.67, 126.91, 126.48 (s, 2C), 125.10, 122.28, 118.57, 114.26, 110.90, 50.11, 28.13. HRMS (ESI-TOF):  $m/z$   $[\text{M} + \text{Na}]^+$  calcd for  $\text{C}_{23}\text{H}_{18}\text{ClNNaO}$ : 382.0969, found: 382.0969.

**2-((1-benzyl-6-methoxy-1H-indol-3-yl) methyl) benzaldehyde (4m)**

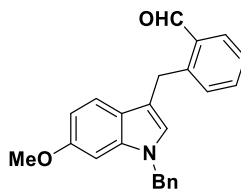

Yellow oil; 52% yield; column chromatography eluent, petroleum ether/EtOAc = 30:1.  $^1\text{H}$  NMR (500 MHz,  $\text{CDCl}_3$ )  $\delta$  10.29 (s, 1H), 7.83 (d,  $J$  = 7.5 Hz, 1H), 7.44 – 7.39 (m, 2H), 7.32 (d,  $J$  = 7.5 Hz, 2H), 7.22 (d,  $J$  = 7.5 Hz, 2H), 7.19 (d,  $J$  = 7.0 Hz, 1H), 7.00 (d,  $J$  = 6.5 Hz, 3H), 6.90 (d,  $J$  = 8.0 Hz, 1H), 6.60 (s, 1H), 5.12 (s, 2H), 4.47 (s, 2H), 2.39 (s, 3H).  $^{13}\text{C}$  NMR (126 MHz,  $\text{CDCl}_3$ )  $\delta$  192.21, 143.66, 137.73, 137.26, 133.99, 133.81, 131.87, 131.01, 130.78, 128.67 (s, 2C), 127.42, 126.68, 126.53 (s, 2C), 126.39, 125.70, 121.08, 118.76, 114.62, 109.69, 49.68, 28.27, 21.82. HRMS (ESI-TOF):  $m/z$   $[\text{M} + \text{Na}]^+$  calcd for  $\text{C}_{24}\text{H}_{21}\text{NNaO}_2$ : 378.1465, found: 378.1461.

**2-((1-benzyl-6-fluoro-1H-indol-3-yl) methyl) benzaldehyde (4n)**

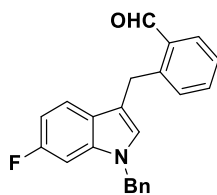

Yellow oil; 56% yield; column chromatography eluent, petroleum ether/EtOAc = 30:1. **<sup>1</sup>H NMR (500 MHz, CDCl<sub>3</sub>)** δ 10.29 (s, 1H), 7.83 (d, *J* = 7.5 Hz, 1H), 7.44 – 7.39 (m, 2H), 7.32 (d, *J* = 7.5 Hz, 2H), 7.22 (d, *J* = 7.5 Hz, 2H), 7.19 (d, *J* = 7.0 Hz, 1H), 7.00 (d, *J* = 6.5 Hz, 3H), 6.90 (d, *J* = 8.0 Hz, 1H), 6.60 (s, 1H), 5.12 (s, 2H), 4.47 (s, 2H), 2.39 (s, 3H). **<sup>13</sup>C NMR (126 MHz, CDCl<sub>3</sub>)** δ 192.43, 161.03, 159.13, 143.26, 137.10, 136.86 (d, *J* = 12.6 Hz, 1C), 133.97, 131.41, 131.08, 128.86 (s, 2C), 127.75, 127.40 (d, *J* = 3.7 Hz, 1C), 126.95, 126.63 (s, 2C), 124.42, 119.93 (d, *J* = 10.2 Hz, 1C), 115.00, 108.07 (d, *J* = 24.7 Hz, 1C), 96.33 (d, *J* = 26.21 Hz, 1C), 50.17, 28.31. **<sup>19</sup>F NMR (470 MHz, CDCl<sub>3</sub>)** δ -120.54. HRMS (ESI-TOF): *m/z* [M + Na]<sup>+</sup> calcd for C<sub>23</sub>H<sub>18</sub>FNNaO: 366.1265, found: 366.1267.

***5,6<sup>l</sup>,10b,16b-tetrahydro-[1,3]dioxolo [4',5':6,7]chromeno[4,3,2-hi]dibenzo[b,f]indolizine (3aa)***

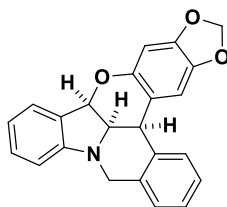

White solid; 32.3 mg, 91% yield, mp 136-138 °C; direct filtration purification. **<sup>1</sup>H NMR (500 MHz, CDCl<sub>3</sub>)** δ 7.39 (d, *J* = 7.5 Hz, 1H), 7.36 – 7.33 (m, 3H), 7.30 – 7.28 (m, 1H), 7.14 (td, *J* = 8.0, 1.5 Hz, 1H), 6.67 (t, *J* = 7.5 Hz, 1H), 6.35 – 6.34 (m, 2H), 6.00 (d, *J* = 1.5 Hz, 1H), 5.85 (d, *J* = 8.5 Hz, 1H), 5.75 (d, *J* = 1.5 Hz, 1H), 5.70 (d, *J* = 1.0 Hz, 1H), 4.42 (dd, *J* = 8.5, 3.5 Hz, 1H), 4.27 (dd, *J* = 53.0, 15.5 Hz, 2H), 4.19 (d, *J* = 3.5 Hz, 1H). **<sup>13</sup>C NMR (126 MHz, CDCl<sub>3</sub>)** δ 152.01, 148.85, 146.13, 142.24, 134.55, 133.52, 130.88, 130.53, 127.51, 127.46, 127.28, 126.69, 126.22, 120.42, 117.43, 107.25, 106.03, 100.83, 100.74, 78.39, 61.98, 46.43, 38.27. HRMS (ESI-TOF): *m/z* [M + H]<sup>+</sup> calcd for C<sub>23</sub>H<sub>18</sub>NO<sub>3</sub>: 356.1281, found: 356.1281.

***10-methyl-5,6l,10b,16b-tetrahydro-[1,3]dioxolo[4',5':6,7]chromeno[4,3,2-hi]dibenzo[b,f]indolizine (3ba)***

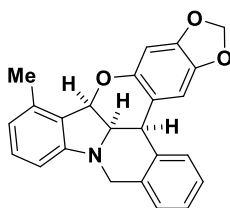

White solid; 27.7 mg, 75% yield, mp 156-158 °C; direct filtration purification.  $^1\text{H NMR}$  (500 MHz,  $\text{CDCl}_3$ )  $\delta$  7.37 – 7.33 (m, 3H), 7.29 – 7.27 (m, 1H), 7.04 (t,  $J = 7.5$  Hz, 1H), 6.47 (d,  $J = 7.5$  Hz, 1H), 6.34 (s, 1H), 6.17 (d,  $J = 7.5$  Hz, 1H), 6.00 (s, 1H), 5.92 (d,  $J = 8.5$  Hz, 1H), 5.72 (dd,  $J = 28.0, 1.5$  Hz, 2H), 4.41 (dd,  $J = 8.5, 3.5$  Hz, 1H), 4.26 (dd,  $J = 47.5, 15.5$  Hz, 2H), 4.19 (d,  $J = 3.5$  Hz, 1H), 2.46 (s, 3H).  $^{13}\text{C NMR}$  (126 MHz,  $\text{CDCl}_3$ )  $\delta$  151.96, 148.96, 146.07, 142.24, 136.87, 134.61, 133.63, 130.89, 130.55, 127.47, 127.45, 126.63, 125.32, 120.68, 118.95, 107.31, 103.47, 100.72, 100.56, 77.84, 61.86, 46.47, 38.39, 18.02. HRMS (ESI-TOF):  $m/z$   $[\text{M} + \text{H}]^+$  calcd for  $\text{C}_{24}\text{H}_{20}\text{NO}_3$ :370.1438, found: 370.1437.

***10-fluoro-5,6<sup>l</sup>,10b,16b-tetrahydro-[1,3]dioxolo[4',5':6,7]chromeno[4,3,2-hi]dibenzo[b,f]indolizine (3ca)***

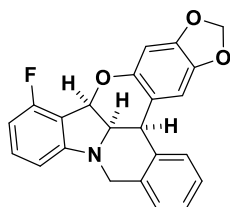

White solid; 27.4 mg, 60% yield, mp 149-150 °C; direct filtration purification.  $^1\text{H NMR}$  (500 MHz,  $\text{CDCl}_3$ )  $\delta$  7.39 – 7.33 (m, 3H), 7.30 – 7.27 (m, 1H), 7.09 (td,  $J = 8.5, 6.0$  Hz, 1H), 6.43 (s, 1H), 6.33 (t,  $J = 8.5$  Hz, 1H), 6.08 (dd,  $J = 13.5, 8.0$  Hz, 2H), 5.97 (d,  $J = 1.0$  Hz, 1H), 5.75 (dd,  $J = 19.0, 1.5$  Hz, 2H), 4.48 (dd,  $J = 9.0, 3.5$  Hz, 1H), 4.28 (dd,  $J = 62.0, 15.5$  Hz, 2H), 4.20 (s, 1H).  $^{13}\text{C NMR}$  (126 MHz,  $\text{CDCl}_3$ )  $\delta$  161.75, 159.76, 154.18 (d,  $J = 8.6$  Hz, 1C), 148.66, 146.25, 142.49, 134.23, 133.04, 132.63 (d,  $J = 9.2$  Hz, 1C), 130.90, 127.66, 127.40, 126.85, 120.44, 112.70 (d,  $J = 20.2$  Hz, 1C), 107.22, 104.41 (d,  $J = 20.8$  Hz, 1C), 101.77 (d,  $J = 2.6$  Hz, 1C), 100.85 (d,  $J = 8.1$  Hz, 1C), 75.88, 62.49, 46.35, 38.32.  $^{19}\text{F NMR}$  (470 MHz,  $\text{CDCl}_3$ )  $\delta$  -118.64. HRMS (ESI-TOF):  $m/z$   $[\text{M} + \text{H}]^+$  calcd for  $\text{C}_{23}\text{H}_{17}\text{FNO}_3$ :374.1187, found: 374.1187.

***10-chloro-5,6<sup>l</sup>,10b,16b-tetrahydro-[1,3]dioxolo[4',5':6,7]chromeno[4,3,2-***

*hi*dibenzo[*b,f*]indolizine (3da)

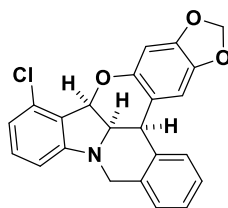

White solid; 24.6 mg, 63% yield, mp 152-153 °C; direct filtration purification.  $^1\text{H NMR}$  (500 MHz,  $\text{CDCl}_3$ )  $\delta$  7.38 -7.34 (m, 3H), 7.29 – 7.27 (m, 1H), 7.04 (t,  $J = 8.0$  Hz, 1H), 6.59 (d,  $J = 8.0$  Hz, 1H), 6.44 (s, 1H), 6.18 (d,  $J = 8.0$  Hz, 1H), 5.97 (d,  $J = 9.5$  Hz, 2H), 5.74 (dd,  $J = 21.5, 1.5$  Hz, 2H), 4.47 (dd,  $J = 8.5, 3.0$  Hz, 1H), 4.35 – 4.17 (m, 3H).  $^{13}\text{C NMR}$  (126 MHz,  $\text{CDCl}_3$ )  $\delta$  153.22, 148.66, 146.23, 142.50, 134.23, 132.96, 132.58, 131.91, 130.89, 127.66, 127.39, 126.86, 124.28, 120.62, 117.54, 107.16, 104.07, 100.92, 100.80, 77.52, 61.90, 46.22, 38.33. HRMS (ESI-TOF):  $m/z$   $[\text{M} + \text{H}]^+$  calcd for  $\text{C}_{23}\text{H}_{17}\text{ClNO}_3$ :374.1187, found: 374.1187.

*9-methyl-5,6<sup>1</sup>,10b,16b-tetrahydro-[1,3]dioxolo[4',5':6,7]chromeno[4,3,2-hi]dibenzo[*b,f*]indolizine (3ea)*

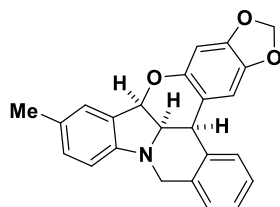

White solid; 31.8 mg, 86% yield, mp 90-92 °C; direct filtration purification.  $^1\text{H NMR}$  (500 MHz,  $\text{CDCl}_3$ )  $\delta$  7.34 – 7.31 (m, 3H), 7.26 – 7.24 (m, 1H), 7.02 (d,  $J = 2.5$  Hz, 1H), 6.73 (dd,  $J = 8.5, 3.0$  Hz, 1H), 6.35 (s, 1H), 6.30 (d,  $J = 8.5$  Hz, 1H), 6.05 (s, 1H), 5.76 (d,  $J = 8.5$  Hz, 1H), 5.71 (dd,  $J = 28.0, 1.5$  Hz, 2H), 4.32 (dd,  $J = 8.5, 3.5$  Hz, 1H), 4.26 – 4.13 (m, 3H), 3.76 (s, 3H).  $^{13}\text{C NMR}$  (126 MHz,  $\text{CDCl}_3$ )  $\delta$  152.67, 148.91, 146.70, 146.14, 142.20, 134.71, 133.92, 130.73, 128.50, 127.47, 127.45, 126.70, 119.92, 116.26, 112.41, 107.16, 107.11, 100.75, 100.66, 78.47, 62.73, 56.10, 47.68, 38.22. HRMS (ESI-TOF):  $m/z$   $[\text{M} + \text{H}]^+$  calcd for  $\text{C}_{24}\text{H}_{20}\text{NO}_3$ :370.1438, found: 370.1438.

*9-methoxy-5,6<sup>1</sup>,10b,16b-tetrahydro-[1,3]dioxolo[4',5':6,7]chromeno[4,3,2-hi]dibenzo[*b,f*]indolizine (3fa)*

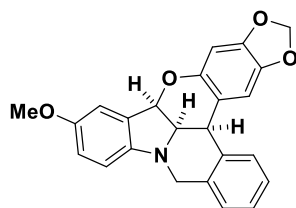

White solid; 30.8 mg, 80% yield, mp 204-206 °C; direct filtration purification.  $^1\text{H NMR}$  (500 MHz,  $\text{CDCl}_3$ )  $\delta$  7.36 – 7.34 (m, 3H), 7.29 – 7.27 (m, 1H), 7.04 (d,  $J = 2.5$  Hz, 1H), 6.76 (dd,  $J = 8.0, 2.5$  Hz, 1H), 6.36 – 6.32 (m, 2H), 6.05 (s, 1H), 5.80 – 5.72 (m, 3H), 4.36 (dd,  $J = 8.5, 3.5$  Hz, 1H), 4.28 – 4.14 (m, 3H), 3.77 (s, 3H).  $^{13}\text{C NMR}$  (126 MHz,  $\text{CDCl}_3$ )  $\delta$  152.68, 148.91, 146.72, 146.15, 142.21, 134.72, 133.93, 130.74, 128.51, 127.48, 126.72, 119.94, 116.29, 112.42, 107.17, 107.12, 100.77, 100.67, 78.50, 62.75, 56.13, 47.70, 38.24, 29.71. HRMS (ESI-TOF):  $m/z$   $[\text{M} + \text{H}]^+$  calcd for  $\text{C}_{24}\text{H}_{20}\text{NO}_4$ :386.1387, found: 386.1388.

***9-fluoro-5,6<sup>1</sup>,10b,16b-tetrahydro-[1,3]dioxolo[4',5':6,7]chromeno[4,3,2-hi]dibenzo[b,f]indolizine (3ga)***

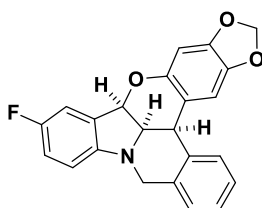

White solid; 27.6 mg, 74% yield, mp 160-162 °C; direct filtration purification.  $^1\text{H NMR}$  (500 MHz,  $\text{CDCl}_3$ )  $\delta$  7.38 – 7.32 (m, 3H), 7.30 – 7.27 (m, 1H), 7.11 (dd,  $J = 8.0, 2.5$  Hz, 1H), 6.84 (td,  $J = 8.5, 2.5$  Hz, 1H), 6.35 (s, 1H), 6.24 (dd,  $J = 8.5, 4.0$  Hz, 1H), 6.01 (d,  $J = 1.0$  Hz, 1H), 5.80 (d,  $J = 8.5$  Hz, 1H), 5.74 (dd,  $J = 21.5, 1.5$  Hz, 2H), 4.42 (dd,  $J = 8.5, 3.5$  Hz, 1H), 4.21 (dd,  $J = 81.5, 14.5$  Hz, 2H), 4.31 – 4.12 (m, 3H).  $^{13}\text{C NMR}$  (126 MHz,  $\text{CDCl}_3$ )  $\delta$  156.92, 155.06, 148.66, 148.48, 146.24, 142.39, 134.40, 133.48, 130.77, 128.34 (d,  $J = 7.6$  Hz, 1C), 127.59, 127.45, 126.83, 120.18, 116.84 (d,  $J = 23.7$  Hz, 1C), 113.29 (d,  $J = 23.8$  Hz, 1C), 107.16, 106.31 (d,  $J = 8.1$  Hz, 1C), 100.80 (d,  $J = 4.4$  Hz, 1C), 78.12 (d,  $J = 2.3$  Hz, 1C), 62.60, 47.13, 38.26.  $^{19}\text{F NMR}$  (470 MHz,  $\text{CDCl}_3$ )  $\delta$  -127.24. HRMS (ESI-TOF):  $m/z$   $[\text{M} + \text{H}]^+$  calcd for  $\text{C}_{23}\text{H}_{17}\text{FNO}_3$ :374.1187, found: 374.1189.



**9-chloro-5,6<sup>1</sup>,10b,16b-tetrahydro-[1,3]dioxolo[4',5':6,7]chromeno[4,3,2-hi]dibenzo[b,f]indolizine (3ha)**

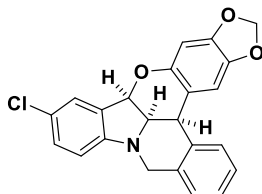

White solid; 27.3 mg, 70% yield, mp 176-178 °C; direct filtration purification. <sup>1</sup>H NMR (500 MHz, CDCl<sub>3</sub>) δ 7.30 – 7.25 (m, 4H), 7.22 – 7.20 (m, 1H), 7.00 (dd, *J* = 8.5, 2.0 Hz, 1H), 6.29 (s, 1H), 6.17 (d, *J* = 8.0 Hz, 1H), 5.91 (s, 1H), 5.74 (d, *J* = 8.5 Hz, 1H), 5.68 (d, *J* = 20.0 Hz, 2H), 4.38 (dd, *J* = 9.0, 4.0 Hz, 1H), 4.27 – 4.07 (m, 3H). <sup>13</sup>C NMR (126 MHz, CDCl<sub>3</sub>) δ 150.59, 148.56, 146.29, 142.48, 134.23, 133.15, 130.86, 130.37, 128.85, 127.67, 127.45, 126.89, 126.25, 121.68, 120.39, 107.22, 106.71, 100.98, 100.86, 77.96, 62.30, 46.42, 38.26. HRMS (ESI-TOF): *m/z* [M + H]<sup>+</sup> calcd for C<sub>23</sub>H<sub>17</sub>ClNO<sub>3</sub>:390.0892, found: 390.0896.

**8-fluoro-5,6<sup>1</sup>,10b,16b-tetrahydro-[1,3]dioxolo[4',5':6,7]chromeno[4,3,2-hi]dibenzo[b,f]indolizine (3ia)**

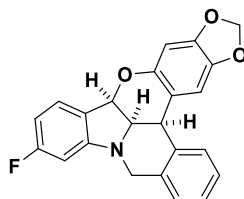

White solid; 20.9 mg, 56% yield, mp 204-206 °C; column chromatography eluent, petroleum ether/EtOAc = 10:1. <sup>1</sup>H NMR (500 MHz, CDCl<sub>3</sub>) δ 7.30 – 7.24 (m, 3H), 7.21 – 7.19 (m, 2H), 6.26 (s, 1H), 6.23 (td, *J* = 10.0, 8.0, 2.0 Hz, 1H), 5.91 (dd, *J* = 10.0, 2.5 Hz, 1H), 5.88 (d, *J* = 1.0 Hz, 1H), 5.74 (d, *J* = 9.0 Hz, 1H), 5.66 (dd, *J* = 20.0, 1.5 Hz, 2H), 4.42 (dd, *J* = 8.5, 3.5 Hz, 1H), 4.26 – 4.06 (m, 3H). <sup>13</sup>C NMR (126 MHz, CDCl<sub>3</sub>) δ 166.45, 164.51, 153.61 (d, *J* = 12.7 Hz, 1C), 148.64, 146.29, 142.46, 134.28, 132.98, 130.88, 127.69, 127.45, 127.06 (d, *J* = 11.1 Hz, 1C), 126.89, 122.77 (d, *J* = 2.1 Hz, 1C), 120.66, 107.26, 103.54 (d, *J* = 23.3 Hz, 1C), 100.93 (d, *J* = 21.8 Hz, 1C), 93.57 (d, *J* = 26.2 Hz, 1C), 77.89, 62.83, 46.06, 38.44. <sup>19</sup>F NMR (470 MHz, CDCl<sub>3</sub>) δ -111.20. HRMS (ESI-TOF): *m/z* [M + H]<sup>+</sup> calcd for C<sub>23</sub>H<sub>17</sub>FNO<sub>3</sub>:374.1187, found: 374.1189.

**8-methoxy-5,6<sup>1</sup>,10b,16b-tetrahydro-[1,3]dioxolo[4',5':6,7]chromeno[4,3,2-hi]dibenzo[b,f]indolizine (3ja)**

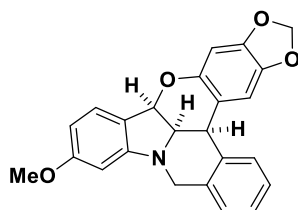

White solid; 26.2 mg, 68% yield, mp 168-172 °C; direct filtration purification. <sup>1</sup>H NMR (500 MHz, CDCl<sub>3</sub>) δ 7.23 – 7.20 (m, 3H), 7.15 – 7.13 (m, 2H), 6.22 (d, *J* = 3.5 Hz, 1H), 6.07 (dt, *J* = 8.5, 2.5 Hz, 1H), 5.86 (d, *J* = 3.0 Hz, 1H), 5.75 (t, *J* = 2.5 Hz, 1H), 5.66 (dd, *J* = 8.5, 3.0 Hz, 1H), 5.59 (dd, *J* = 23.0, 3.0 Hz, 2H), 4.31 (dt, *J* = 7.0, 3.0 Hz, 1H), 4.12 (ddd, *J* = 18.0, 15.0, 3.0 Hz, 2H), 4.03 (t, *J* = 3.5 Hz, 1H), 3.61 (d, *J* = 3.5 Hz, 3H). <sup>13</sup>C NMR (126 MHz, CDCl<sub>3</sub>) δ 162.38, 153.48, 148.85, 146.10, 142.18, 134.52, 133.35, 130.83, 127.47, 127.40, 126.74, 126.66, 120.57, 119.82, 107.19, 102.28, 100.91, 100.69, 92.46, 78.11, 62.75, 55.20, 46.19, 38.44. HRMS (ESI-TOF): *m/z* [M + H]<sup>+</sup> calcd for C<sub>24</sub>H<sub>20</sub>NO<sub>4</sub>: 386.1387, found: 386.1389.

**6<sup>1</sup>-methyl-5,6<sup>1</sup>,10b,16b-tetrahydro-[1,3]dioxolo[4',5':6,7]chromeno[4,3,2-hi]dibenzo[b,f]indolizine (3ka)**

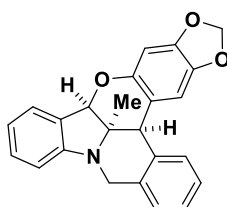

White solid; 12.9 mg, 35% yield, mp 151-152 °C; column chromatography eluent, petroleum ether/EtOAc = 10:1. <sup>1</sup>H NMR (500 MHz, CDCl<sub>3</sub>) δ 7.40 (d, *J* = 7.9 Hz, 1H), 7.22 (dt, *J* = 5.2, 3.5 Hz, 1H), 6.83 – 6.79 (m, 1H), 6.72 (dt, *J* = 7.0, 3.6 Hz, 2H), 6.70 – 6.64 (m, 1H), 6.61 (td, *J* = 7.6, 1.2 Hz, 1H), 6.07 (s, 1H), 6.00 (d, *J* = 8.6 Hz, 2H), 5.85 (d, *J* = 7.8 Hz, 1H), 5.46 (dd, *J* = 23.3, 1.5 Hz, 2H), 5.02 (s, 2H), 4.40 (s, 1H), 1.91 (s, 3H). <sup>13</sup>C NMR (126 MHz, CDCl<sub>3</sub>) δ 154.48, 149.97, 142.78, 141.86, 139.49, 139.12, 136.27, 130.89, 130.72, 130.68, 130.53, 128.59, 123.42, 122.41, 122.24, 111.55, 109.45, 103.38, 101.80, 55.39, 47.31, 25.99, 15.27. HRMS (ESI-TOF): *m/z* [M + H]<sup>+</sup> calcd for C<sub>24</sub>H<sub>20</sub>NO<sub>3</sub>: 370.1438, found: 370.1438.

**10b-methyl-5,6<sup>1</sup>,10b,16b-tetrahydro-[1,3]dioxolo[4',5':6,7]chromeno[4,3,2-hi]dibenzo[b,f]indolizine (3la)**

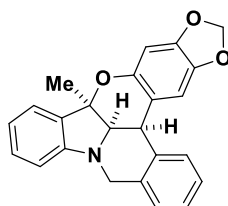

White solid; 14.0 mg, 38% yield, mp 158-159 °C; column chromatography eluent, petroleum ether/EtOAc = 10:1. <sup>1</sup>H NMR (500 MHz, CDCl<sub>3</sub>) δ 7.36 – 7.34 (m, 3H), 7.31 (d, *J* = 7.5 Hz, 1H), 7.29 – 7.27 (m, 1H), 7.11 (t, *J* = 8.0 Hz, 1H), 6.67 (t, *J* = 7.5 Hz, 1H), 6.32 – 6.29 (m, 2H), 5.98 (s, 1H), 5.71 (dd, *J* = 25.5, 1.5 Hz, 2H), 4.26 (dd, *J* = 30, 15 Hz, 2H), 4.12 (dd, *J* = 10.5, 3.5 Hz, 2H), 1.90 (s, 3H). <sup>13</sup>C NMR (126 MHz, CDCl<sub>3</sub>) δ 151.20, 149.34, 146.13, 142.15, 134.58, 133.57, 131.04, 130.78, 130.05, 127.51, 127.42, 126.71, 123.63, 120.16, 117.33, 106.98, 105.83, 100.70, 100.59, 84.31, 68.24, 46.58, 38.84, 26.57. HRMS (ESI-TOF): *m/z* [M + H]<sup>+</sup> calcd for C<sub>24</sub>H<sub>20</sub>NO<sub>3</sub>: 370.1438, found: 370.1439.

**6<sup>1</sup>,10b-dimethyl-5,6<sup>1</sup>,10b,16b-tetrahydro-[1,3]dioxolo[4',5':6,7]chromeno[4,3,2-hi]dibenzo[b,f]indolizine (3ma)**

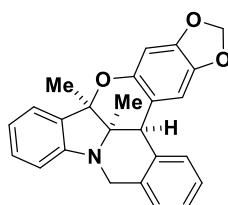

White solid; 17.3 mg, 45% yield, mp 154-158 °C; column chromatography eluent, petroleum ether/EtOAc = 10:1. <sup>1</sup>H NMR (500 MHz, CDCl<sub>3</sub>) δ 7.69 (d, *J* = 8.0 Hz, 1H), 7.50 – 7.47 (m, 1H), 7.11 (td, *J* = 7.5, 1.0 Hz, 1H), 7.05 – 7.02 (m, 2H), 6.92 (td, *J* = 7.5, 1.5 Hz, 1H), 6.36 (s, 1H), 6.28 (s, 1H), 6.18 (dd, *J* = 7.8, 1.3 Hz, 1H), 5.77 (dd, *J* = 21.5, 1.5 Hz, 2H), 5.40 (s, 2H), 5.22 (s, 1H), 4.73 (s, 1H), 2.24 (s, 3H), 2.14 (s, 3H). <sup>13</sup>C NMR (126 MHz, CDCl<sub>3</sub>) δ 150.74, 146.18, 138.98, 138.05, 134.91, 130.99, 127.46, 126.84, 126.74, 124.99, 119.68, 117.78, 116.92, 107.37, 106.23, 105.68, 99.60, 98.02, 43.76, 22.22 (s, 2C), 21.05, 12.78, 8.94, 7.62. HRMS (ESI-TOF): *m/z* [M + H]<sup>+</sup> calcd for C<sub>25</sub>H<sub>22</sub>NO<sub>3</sub>: 384.1594, found: 384.1595.

***10-butyl-5,10,10a,16b-tetrahydro-***  
***[1,3]dioxolo[4',5':6,7]indeno[2',1':3,4]chromeno[2,3-b]indole (5aa)***

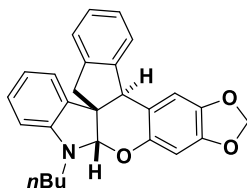

White solid; 40.3 mg, 98% yield, mp 160-162 °C; direct filtration purification. <sup>1</sup>H NMR (500 MHz, CDCl<sub>3</sub>) δ 7.24 – 7.14 (m, 3H), 7.06 – 7.02 (m, 2H), 6.97 (d, *J* = 7.0 Hz, 1H), 6.66 (s, 1H), 6.61 (td, *J* = 7.5, 1.0 Hz, 1H), 6.42 (s, 1H), 6.36 – 6.25 (m, 1H), 5.80 (dd, *J* = 17.5, 1.5 Hz, 2H), 5.31 (s, 1H), 4.35 (s, 1H), 3.37 – 3.21 (m, 2H), 3.30 (dd, *J* = 89.0, 16.0 Hz, 2H), 1.72 – 1.58 (m, 2H), 1.37 (h, *J* = 15.0, 7.5 Hz, 2H), 0.95 (t, *J* = 7.5 Hz, 3H). <sup>13</sup>C NMR (126 MHz, CDCl<sub>3</sub>) δ 149.81, 147.13, 146.94, 144.63, 142.20, 140.27, 132.09, 128.38, 127.37, 127.08, 124.62, 123.89, 122.15, 118.67, 117.44, 108.58, 105.40, 100.87, 100.80, 100.51, 58.47, 51.82, 46.26, 44.25, 29.62, 20.41, 13.95. HRMS (ESI-TOF): *m/z* [M + H]<sup>+</sup> calcd for C<sub>27</sub>H<sub>26</sub>NO<sub>3</sub>:412.1907, found: 412.1914.

***10-benzyl-5,10,10a,16b-tetrahydro-***  
***[1,3]dioxolo[4',5':6,7]indeno[2',1':3,4]chromeno[2,3-b]indole (5ba)***

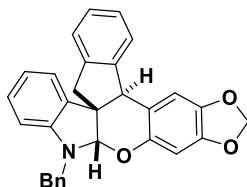

White solid; 39.2 mg, 88% yield, mp 100-101 °C; direct filtration purification. <sup>1</sup>H NMR (500 MHz, CDCl<sub>3</sub>) δ 7.21 – 7.05 (m, 8H), 7.01 (dd, *J* = 7.5, 1.5 Hz, 1H), 6.92 (td, *J* = 8.0, 1.5 Hz, 1H), 6.88 (d, *J* = 7.5 Hz, 1H), 6.60 (s, 1H), 6.57 (t, *J* = 7.5 Hz, 1H), 6.23 (d, *J* = 7.5 Hz, 1H), 6.18 (s, 1H), 5.73 (dd, *J* = 8.0, 1.0 Hz, 2H), 5.23 (s, 1H), 4.42 (s, 2H), 4.30 (s, 1H), 3.24 (dd, *J* = 102.5, 16.0 Hz, 2H). <sup>13</sup>C NMR (126 MHz, CDCl<sub>3</sub>) δ 149.82, 147.15, 147.09, 144.66, 142.42, 140.32, 138.04, 132.33, 128.61 (s, 2C), 128.59, 127.61 (s, 2C), 127.55, 127.26, 127.22, 124.75, 124.04, 122.43, 118.82, 118.22, 108.69, 106.14, 101.15, 101.04, 100.52, 58.59, 52.03, 48.53, 46.34. HRMS (ESI-TOF): *m/z* [M + H]<sup>+</sup> calcd for C<sub>30</sub>H<sub>24</sub>NO<sub>3</sub>:446.1751, found: 446.1754.

***10-methyl-5,10,10a,16b-tetrahydro-***

**[1,3]dioxolo[4',5':6,7]indeno[2',1':3,4]chromeno[2,3-b]indole (5ca)**

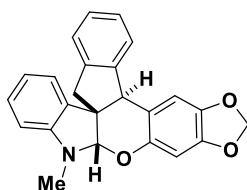

White solid; 17.0 mg, 46% yield, mp 169-170 °C; column chromatography eluent, petroleum ether/EtOAc = 10:1. <sup>1</sup>H NMR (500 MHz, CDCl<sub>3</sub>) δ 7.13 – 7.04 (m, 3H), 6.97 – 6.93 (m, 2H), 6.87 (d, *J* = 7.5 Hz, 1H), 6.56 (s, 1H), 6.53 (td, *J* = 7.0, 1.0 Hz, 1H), 6.32 (s, 1H), 6.24 (d, *J* = 7.5 Hz, 1H), 5.72 (dd, *J* = 16.5, 1.5 Hz, 2H), 5.11 (s, 1H), 4.22 (s, 1H), 3.22 (dd, *J* = 86.5, 16.5 Hz, 2H), 2.78 (s, 3H). <sup>13</sup>C NMR (126 MHz, CDCl<sub>3</sub>) δ 150.21, 147.08, 147.06, 144.62, 142.34, 140.41, 132.46, 128.56, 127.47, 127.18, 124.63, 124.04, 122.16, 118.93, 117.91, 108.64, 105.52, 102.06, 100.99, 100.82, 58.24, 52.05, 46.02, 30.90. HRMS (ESI-TOF): *m/z* [M + H]<sup>+</sup> calcd for C<sub>24</sub>H<sub>20</sub>NO<sub>3</sub>:370.1438, found: 370.1438.

**(5a*S*,10a*S*,16b*S*)-10-allyl-5,10,10a,16b-tetrahydro-[1,3]dioxolo[4',5':6,7]indeno[2',1':3,4]chromeno[2,3-b]indole (5da)**

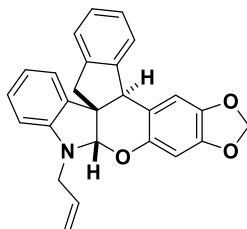

White solid; 27.3 mg, 69% yield, mp 178-180 °C; direct filtration purification. <sup>1</sup>H NMR (500 MHz, CDCl<sub>3</sub>) δ 7.64 (d, *J* = 7.5 Hz, 1H), 7.36 (dd, *J* = 8.0, 3.5 Hz, 2H), 7.18 (ddt, *J* = 20.5, 14.0, 8.0 Hz, 5H), 6.36 (s, 1H), 6.21 (s, 1H), 5.72 (d, *J* = 7.5 Hz, 2H), 5.68 (t, *J* = 4.0 Hz, 1H), 5.57 (ddt, *J* = 15.5, 10.0, 5.0 Hz, 1H), 4.94 – 4.92 (m, 2H), 4.79 (d, *J* = 17.0 Hz, 1H), 4.65 – 4.60 (m, 1H), 4.48 – 4.43 (m, 1H), 4.29 (ddd, *J* = 24.0, 20.0, 3.5 Hz, 2H). <sup>13</sup>C NMR (126 MHz, CDCl<sub>3</sub>) δ 146.88, 146.61, 141.93, 137.69, 137.28, 134.78, 133.27 (s, 2C), 129.65, 129.32, 126.39, 126.38, 126.30, 122.97, 121.70, 119.19, 118.42, 116.04, 109.51, 109.26, 107.94, 101.00, 98.34, 45.58, 37.16, 26.69. HRMS (ESI-TOF): *m/z* [M + H]<sup>+</sup> calcd for C<sub>26</sub>H<sub>22</sub>NO<sub>3</sub>: 396.1594, found: 396.1587.

**(5a*S*,10a*S*,16b*S*)-10-(cyclopropylmethyl)-5,10,10a,16b-tetrahydro-**

**[1,3]dioxolo[4',5':6,7]indeno[2',1':3,4]chromeno[2,3-b]indole (5ea)**

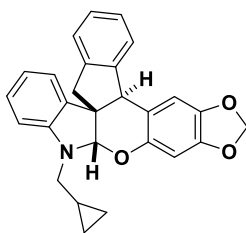

White solid; 31.9 mg, 78% yield, mp 146-148 °C; direct filtration purification. <sup>1</sup>H NMR (500 MHz, CDCl<sub>3</sub>) δ 7.25 – 7.15 (m, 3H), 7.05 (dt, *J* = 7.0, 5.0 Hz, 2H), 7.00 (d, *J* = 7.0 Hz, 1H), 6.67 (s, 1H), 6.62 (t, *J* = 7.0 Hz, 1H), 6.41 (d, *J* = 7.0 Hz, 2H), 5.80 (d, *J* = 17.0 Hz, 2H), 5.49 (s, 1H), 4.35 (s, 1H), 3.40 (d, *J* = 16.0 Hz, 1H), 3.30 – 3.24 (m, 2H), 3.05 (dd, *J* = 14.0, 7.5 Hz, 1H), 1.08 (m, 1H), 0.59 – 0.48 (m, 2H), 0.35 (m, 1H), 0.23 (m, 1H). <sup>13</sup>C NMR (126 MHz, CDCl<sub>3</sub>) δ 149.69, 147.15, 146.91, 144.56, 142.20, 140.35, 132.34, 128.39, 127.39, 127.08, 124.65, 123.96, 122.20, 118.78, 117.63, 108.50, 105.62, 100.87, 100.77, 99.94, 58.31, 51.76, 48.85, 46.14, 9.01, 4.67, 2.97. HRMS (ESI-TOF): *m/z* [M + Na]<sup>+</sup> calcd for C<sub>27</sub>H<sub>23</sub>NNaO<sub>3</sub>: 432.1570, found: 432.1569.

**(5a*S*,10a*S*,16b*S*)-10-benzyl-10a-methyl-5,10,10a,16b-tetrahydro-[1,3]dioxolo[4',5':6,7]indeno[2',1':3,4]chromeno[2,3-b]indole (5fa)**

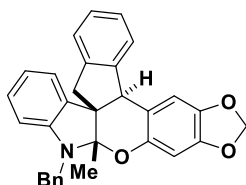

White solid; 35.8 mg, 78% yield, mp 198-200 °C; direct filtration purification. <sup>1</sup>H NMR (500 MHz, CDCl<sub>3</sub>) δ 7.27 – 7.24 (m, 3H), 7.21 – 7.16 (m, 5H), 7.07 (dd, *J* = 10.5, 7.0 Hz, 2H), 6.93 (t, *J* = 7.5 Hz, 1H), 6.78 (s, 1H), 6.64 (t, *J* = 7.5 Hz, 1H), 6.32 (s, 1H), 6.12 (d, *J* = 7.5 Hz, 1H), 5.84 (d, *J* = 9.0 Hz, 2H), 4.54 – 4.36 (m, 3H), 3.44 (dd, *J* = 9.2, 16.5 Hz, 2H), 1.40 (s, 3H). <sup>13</sup>C NMR (126 MHz, CDCl<sub>3</sub>) δ 148.86, 147.30, 146.83, 143.92, 142.06, 140.98, 138.95, 133.07, 128.40 (s, 2C), 128.18, 127.41, 127.03, 126.68, 126.56 (s, 2C), 123.86, 123.77, 121.49, 118.11, 117.83, 108.25, 106.89, 102.15, 100.87, 100.60, 60.16, 51.86, 45.91, 41.57, 20.75. HRMS (ESI-TOF): *m/z* [M + Na]<sup>+</sup> calcd for C<sub>31</sub>H<sub>25</sub>NNaO<sub>3</sub>: 482.1727, found: 482.1727.

**(5a*S*,10a*S*,16b*S*)-10-benzyl-6-methyl-5,10,10a,16b-tetrahydro-**

**[1,3]dioxolo[4',5':6,7]indeno[2',1':3,4]chromeno[2,3-b]indole (5ga)**

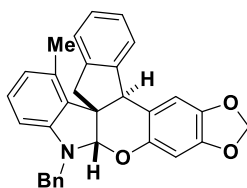

White solid; 30.8 mg, 67% yield, mp 91-93 °C; direct filtration purification. <sup>1</sup>H NMR (500 MHz, CDCl<sub>3</sub>) δ 7.27 – 7.20 (m, 6H), 7.17 (t, *J* = 7.5 Hz, 1H), 7.12 (t, *J* = 7.5 Hz, 1H), 6.94 – 6.89 (m, 2H), 6.73 (s, 1H), 6.46 (d, *J* = 7.5 Hz, 1H), 6.22 (s, 1H), 6.16 (d, *J* = 8.0 Hz, 1H), 5.82 (d, *J* = 10.0 Hz, 2H), 5.32 (s, 1H), 4.73 (s, 1H), 4.46 (dd, *J* = 23.5, 16.0 Hz, 2H), 3.48 (dd, *J* = 321.5, 16.5 Hz, 2H), 2.30 (s, 3H). <sup>13</sup>C NMR (126 MHz, CDCl<sub>3</sub>) δ 150.25, 147.00, 146.98, 145.22, 142.20, 140.29, 137.97, 133.94, 128.44 (s, 2C), 128.42, 128.07, 127.41 (s, 2C), 127.26, 127.07, 127.01, 124.71, 123.77, 121.23, 118.86, 108.80, 104.06, 101.42, 101.10, 100.93, 58.65, 49.60, 48.58, 44.19, 19.19. HRMS (ESI-TOF): *m/z* [M + Na]<sup>+</sup> calcd for C<sub>31</sub>H<sub>25</sub>NNaO<sub>3</sub>: 482.1727, found: 482.1731.

**(5a*S*,10a*S*,16b*S*)-10-benzyl-6-fluoro-5,10,10a,16b-tetrahydro-**

**[1,3]dioxolo[4',5':6,7]indeno[2',1':3,4]chromeno[2,3-b]indole (5ha)**

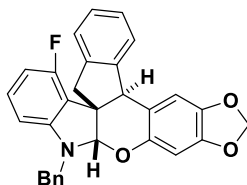

White solid; 21.3 mg, 46% yield, mp 153-154 °C; column chromatography eluent, petroleum ether/EtOAc = 20:1. <sup>1</sup>H NMR (500 MHz, CDCl<sub>3</sub>) δ 7.32 – 7.28 (m, 2H), 7.27 – 7.21 (m, 4H), 7.18 (t, *J* = 7.5 Hz, 1H), 7.13 (t, *J* = 7.5 Hz, 1H), 6.96 (dd, *J* = 14.0, 8.0 Hz, 1H), 6.87 (d, *J* = 7.0 Hz, 1H), 6.76 (s, 1H), 6.35 (t, *J* = 9.0 Hz, 1H), 6.23 (s, 1H), 6.08 (d, *J* = 8.0 Hz, 1H), 5.89 (dd, *J* = 9.0, 2.0 Hz, 2H), 5.37 (s, 1H), 4.73 (s, 1H), 4.48 (s, 2H), 3.82 (d, *J* = 15.5 Hz, 1H), 3.14 (d, *J* = 15.5 Hz, 1H). <sup>13</sup>C NMR (126 MHz, CDCl<sub>3</sub>) δ 160.75, 158.80, 152.27 (d, *J* = 9.3 Hz, 1C), 147.12, 146.69, 145.27, 142.46, 140.14, 137.52, 130.30 (d, *J* = 9.2 Hz, 1C), 128.57 (s, 2C), 127.38 (s, 2C), 127.23 (d, *J* = 2.1 Hz, 1C), 127.07, 124.55, 123.46, 118.80, 109.19, 105.63, 105.46, 101.76 (d, *J* = 2.5 Hz, 1C), 101.27, 101.01, 100.47, 58.07 (d, *J* = 3.0 Hz, 1C), 49.99, 48.26, 44.28. <sup>19</sup>F NMR (470 MHz, CDCl<sub>3</sub>) δ -119.72. HRMS (ESI-TOF): *m/z* [M +

$[\text{Na}]^+$  calcd for  $\text{C}_{30}\text{H}_{22}\text{FNNaO}_3$ : 486.1476, found: 486.1471.

**(5a*S*,10a*S*,16b*S*)-10-benzyl-6-chloro-5,10,10a,16b-tetrahydro-[1,3]dioxolo[4',5':6,7]indeno[2',1':3,4]chromeno[2,3-*b*]indole (5ia)**

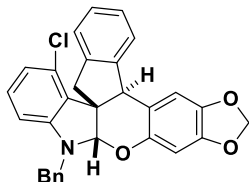

White solid; 19.2 mg, 40% yield, mp 171-173 °C; column chromatography eluent, petroleum ether/EtOAc = 20:1.  $^1\text{H NMR}$  (500 MHz,  $\text{CDCl}_3$ )  $\delta$  7.29 – 7.23 (m, 4H),  $\delta$  7.21 – 7.16 (m, 3H), 7.11 (t,  $J = 7.5$  Hz, 1H), 6.91 (t,  $J = 8.0$  Hz, 1H), 6.85 (d,  $J = 7.5$  Hz, 1H), 6.76 (s, 1H), 6.59 (d,  $J = 8.0$  Hz, 1H), 6.22 (s, 1H), 6.16 (d,  $J = 8.0$  Hz, 1H), 5.86 (d,  $J = 11.0$  Hz, 2H), 5.42 (s, 1H), 5.11 (s, 1H), 4.47 (s, 2H), 4.17 (d,  $J = 16.0$  Hz, 1H), 3.03 (d,  $J = 16.0$  Hz, 1H).  $^{13}\text{C NMR}$  (126 MHz,  $\text{CDCl}_3$ )  $\delta$  151.74, 147.11, 146.64, 145.20, 142.47, 139.99, 137.32, 130.45, 129.87, 128.57 (s, 2C), 127.29 (s, 2C), 127.23, 127.18, 127.05, 126.06, 124.66, 123.47, 119.17, 119.12, 109.23, 104.15, 101.31, 101.03, 100.98, 59.68, 48.61, 48.13, 43.37. **HRMS (ESI-TOF):**  $m/z$   $[\text{M} + \text{Na}]^+$  calcd for  $\text{C}_{30}\text{H}_{22}\text{ClNNaO}_3$ : 502.1180, found: 502.1183.

**(5a*S*,10a*S*,16b*S*)-10-benzyl-7-methoxy-5,10,10a,16b-tetrahydro-[1,3]dioxolo[4',5':6,7]indeno[2',1':3,4]chromeno[2,3-*b*]indole (5ja)**

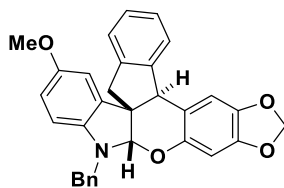

White solid; 42.3 mg, 89% yield, mp 191-193 °C; direct filtration purification.  $^1\text{H NMR}$  (500 MHz,  $\text{CDCl}_3$ )  $\delta$  7.39 (d,  $J = 7.5$  Hz, 1H), 7.32 (d,  $J = 7.5$  Hz, 1H), 7.20 (t,  $J = 7.0$  Hz, 1H), 7.15 – 7.12 (m, 5H), 7.05 (d,  $J = 8.5$  Hz, 1H), 6.83 – 6.78 (m, 3H), 6.33 (s, 1H), 6.12 (d,  $J = 1.0$  Hz, 1H), 5.73 (d,  $J = 1.5$  Hz, 2H), 5.64 (t,  $J = 3.5$  Hz, 1H), 5.17 (dd,  $J = 88.0, 17.0$  Hz, 2H), 4.95 (s, 1H), 4.31 (ddd,  $J = 24.0, 20.5, 4.0$  Hz, 2H), 3.90 (d,  $J = 1.0$  Hz, 3H).  $^{13}\text{C NMR}$  (126 MHz,  $\text{CDCl}_3$ )  $\delta$  154.03, 146.87, 146.60, 141.88, 137.97, 137.68, 135.82, 133.26, 132.96, 129.74, 129.32, 128.34 (s, 2C), 126.80, 126.68, 126.44, 126.33, 125.81 (s, 2C), 122.75, 111.64, 110.37, 109.26, 107.84, 100.98, 100.80,



98.38, 56.02, 46.71, 37.42, 26.85. HRMS (ESI-TOF):  $m/z$   $[M + H]^+$  calcd for  $C_{31}H_{26}NO_4$ : 476.1856, found: 476.1846.

**(5a*S*,10a*S*,16b*S*)-10-benzyl-7-fluoro-5,10,10a,16b-tetrahydro-[1,3]dioxolo[4',5':6,7]indeno[2',1':3,4]chromeno[2,3-*b*]indole (5ka)**

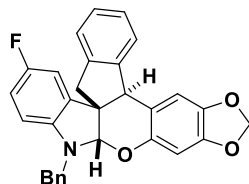

White solid; 45.0 mg, 97% yield, mp 121-123 °C; direct filtration purification.  $^1H$  NMR (500 MHz,  $CDCl_3$ )  $\delta$  7.36 (d,  $J = 7.5$  Hz, 1H), 7.32 – 7.29 (m, 2H), 7.18 (t,  $J = 7.0$  Hz, 1H), 7.13 – 7.10 (m, 4H), 7.02 (q,  $J = 4.5$  Hz, 1H), 6.86 (td,  $J = 9.0, 2.5$  Hz, 1H), 6.76 – 6.74 (m, 2H), 6.27 (s, 1H), 6.07 (s, 1H), 5.21 (dd  $J = 82.0, 17.5$  Hz, 2H), 4.79 (s, 1H), 4.26 (ddd,  $J = 24.0, 20.5, 4.0$  Hz, 2H).  $^{13}C$  NMR (126 MHz,  $CDCl_3$ )  $\delta$  158.78, 156.92, 146.54 (d,  $J = 4.0$  Hz, 1C), 141.96, 137.61 (d,  $J = 4.0$  Hz, 1C), 137.18, 134.16, 133.04, 129.70, 129.32, 128.35 (s, 2C), 126.87, 126.67 (d,  $J = 9.8$  Hz, 1C), 126.46 (d,  $J = 14.5$  Hz, 1C), 125.73 (s, 2C), 122.70, 110.17 (d,  $J = 9.7$  Hz, 1C), 109.95, 109.74, 109.15, 108.20 (d,  $J = 4.5$  Hz, 1C), 103.66, 103.47, 100.98, 98.22, 46.73, 37.01, 26.67.  $^{19}F$  NMR (470 MHz,  $CDCl_3$ )  $\delta$  -126.25. HRMS (ESI-TOF):  $m/z$   $[M + H]^+$  calcd for  $C_{30}H_{23}FNO_3$ : 464.1657, found: 464.1645.

**(5a*S*,10a*S*,16b*S*)-10-benzyl-7-chloro-5,10,10a,16b-tetrahydro-[1,3]dioxolo[4',5':6,7]indeno[2',1':3,4]chromeno[2,3-*b*]indole (5la)**

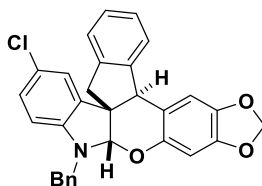

Yellow oil; 44.2 mg, 92% yield; direct filtration purification.  $^1H$  NMR (500 MHz,  $CDCl_3$ )  $\delta$  7.30 – 7.27 (m, 2H), 7.25 – 7.17 (m, 5H), 7.15 (t,  $J = 7.5$  Hz, 1H), 7.03 (d,  $J = 2.0$  Hz, 1H), 6.96 (d,  $J = 7.5$  Hz, 1H), 6.93 (dd,  $J = 8.5, 2.0$  Hz, 1H), 6.68 (s, 1H), 6.28 (s, 1H), 6.18 (d,  $J = 8.5$  Hz, 1H), 5.83 (d,  $J = 6.5$  Hz, 2H), 5.29 (s, 1H), 4.47 (s, 2H), 4.33 (s, 1H), 3.29 (dd,  $J = 82.0, 16.0$  Hz, 2H)  $^{13}C$  NMR (126 MHz,  $CDCl_3$ )  $\delta$  148.35, 147.19, 146.93, 144.24, 142.56, 139.88, 137.50, 134.29, 128.69 (s, 2C), 128.31,

127.68, 127.50 (s, 2C), 127.38 (s, 2C), 124.78, 124.07, 122.84, 122.71, 118.47, 108.65, 106.95, 101.11 (s, 2C), 100.39, 58.49, 51.88, 48.44, 46.11. HRMS (ESI-TOF):  $m/z$  [ $M + H$ ]<sup>+</sup> calcd for C<sub>30</sub>H<sub>23</sub>ClNO<sub>3</sub>: 480.1361, found: 480.1354.

**(5a*S*,10a*S*,16b*S*)-10-benzyl-8-methoxy-5,10,10a,16b-tetrahydro-[1,3]dioxolo[4',5':6,7]indeno[2',1':3,4]chromeno[2,3-*b*]indole (5ma)**

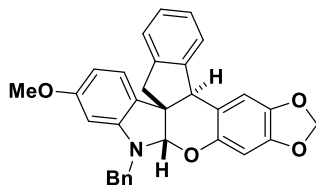

White solid; 35.2 mg, 74% yield, mp 190–191 °C; direct filtration purification. <sup>1</sup>H NMR (500 MHz, CDCl<sub>3</sub>) δ 7.56 (d,  $J = 8.0$  Hz, 1H), 7.37 (d,  $J = 7.5$  Hz, 1H), 7.30 (d,  $J = 8.0$  Hz, 1H), 7.18 (t,  $J = 7.5$  Hz, 1H), 7.13 – 6.10 (m, 4H), 7.00 (d,  $J = 8.0$  Hz, 1H), 6.97 (s, 1H), 6.80 – 6.78 (m, 2H), 6.32 (s, 1H), 6.06 (d,  $J = 1.5$  Hz, 1H), 5.70 (s, 2H), 5.57 (t,  $J = 4.0$  Hz, 1H), 5.15 (dd,  $J = 96.5, 17.0$  Hz, 2H), 4.89 (d,  $J = 10.5$  Hz, 1H), 4.31 (ddd,  $J = 24.0, 20.0, 3.5$  Hz, 2H), 2.41 (s, 3H). <sup>13</sup>C NMR (126 MHz, CDCl<sub>3</sub>) δ 146.99, 146.58, 141.81, 138.24, 137.96, 137.59, 134.27, 133.29, 131.86, 129.70, 129.31, 128.32 (s, 2C), 126.71, 126.37, 126.30, 125.74 (s, 2C), 124.25, 122.64, 121.07, 118.16, 109.58, 109.26, 108.13, 100.94, 98.42, 46.43, 37.53, 26.80, 21.92. HRMS (ESI-TOF):  $m/z$  [ $M + H$ ]<sup>+</sup> calcd for C<sub>31</sub>H<sub>26</sub>NO<sub>4</sub>: 476.1856, found: 476.1856.

**(5a*S*,10a*S*,16b*S*)-10-benzyl-8-fluoro-5,10,10a,16b-tetrahydro-[1,3]dioxolo[4',5':6,7]indeno[2',1':3,4]chromeno[2,3-*b*]indole (5na)**

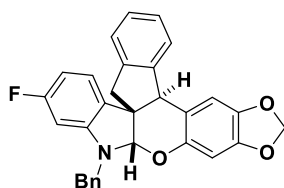

Colorless oil; 30.6 mg, 66% yield; direct filtration purification. <sup>1</sup>H NMR (500 MHz, CDCl<sub>3</sub>) δ 7.33 – 7.30 (m, 2H), 7.28 – 7.27 (m, 1H), 7.26 – 7.16 (m, 5H), 7.00 (ddd,  $J = 7.5, 5.5, 1.5$  Hz, 1H), 6.96 (d,  $J = 7.0$  Hz, 1H), 6.70 (d,  $J = 1.5$  Hz, 1H), 6.34 – 7.30 (m, 1H), 6.29 (d,  $J = 1.5$  Hz, 1H), 6.02 (dt,  $J = 3.5, 2.0$  Hz, 1H), 5.90 – 5.89 (m, 2H), 5.35 (d,  $J = 1.5$  Hz, 1H), 4.49 (d,  $J = 2.5$  Hz, 2H), 4.35 (s, 1H), 3.32 (dd,  $J = 101.0, 16.0$  Hz, 2H). <sup>13</sup>C NMR (126 MHz, CDCl<sub>3</sub>) δ 164.95, 163.02, 151.25 (d,  $J = 12.2$  Hz, 1C),

147.10, 146.80, 144.39, 142.51, 140.00, 137.25, 128.66 (s, 2C), 127.54, 127.47 (s, 2C), 127.36, 127.26, 124.67, 123.90, 122.92 (d,  $J = 10.8$  Hz, 1C), 118.70, 108.64, 103.85 (d,  $J = 23.1$  Hz, 1C), 101.08 (d,  $J = 8.2$  Hz, 1C), 100.66, 94.30 (d,  $J = 27.7$  Hz, 1C), 58.13, 52.18, 48.22, 46.32.  $^{19}\text{F}$  NMR (470 MHz,  $\text{CDCl}_3$ )  $\delta$  -113.68. HRMS (ESI-TOF):  $m/z$   $[\text{M} + \text{H}]^+$  calcd for  $\text{C}_{30}\text{H}_{23}\text{FNO}_3$ : 464.1657, found: 464.1655.

**(5bS,5b1S,15bS)-5b,5b1,10,15b-tetrahydro-3H-dibenzo[b,f]pyrrolo[2',3':7,8]chromeno[4,3,2-hi]indolizine (6ab)**

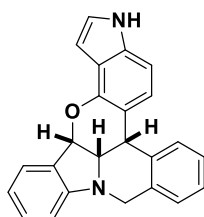

White solid; 31.9 mg, 91% yield, mp 195-198 °C, direct filtration purification.  $^1\text{H}$  NMR (500 MHz,  $\text{CDCl}_3$ )  $\delta$  7.72 (s, 1H), 7.55 (dd,  $J = 7.5, 1.5$  Hz, 1H), 7.50 – 7.47 (m, 1H), 7.44 – 7.39 (m, 2H), 7.33 – 7.32 (m, 1H), 7.10 (td,  $J = 7.5, 1.5$  Hz, 1H), 6.88 (dd,  $J = 3.0, 2.0$  Hz, 1H), 6.72 – 6.68 (m, 2H), 6.54 – 6.53 (m, 1H), 6.48 (d,  $J = 8.5$  Hz, 1H), 6.33 (d,  $J = 8.0$  Hz, 1H), 6.01 (d,  $J = 7.0$  Hz, 1H), 5.31 (s, 1H), 4.47 (s, 1H), 4.29 (dd,  $J = 26, 15$  Hz, 2H).  $^{13}\text{C}$  NMR (126 MHz,  $\text{CDCl}_3$ )  $\delta$  152.09, 147.50, 136.36, 135.56, 133.60, 131.30, 130.34, 128.37, 127.43, 127.15, 126.40, 126.09, 123.38, 121.43, 119.55, 117.66, 115.39, 106.47, 104.20, 99.44, 77.63, 62.68, 46.81, 37.47. HRMS (ESI-TOF):  $m/z$   $[\text{M} + \text{H}]^+$  calcd for  $\text{C}_{24}\text{H}_{19}\text{N}_2\text{O}$ : 351.1492, found: 351.1491.

**(5bS,5b1S,15bS)-15-methyl-5b,5b1,10,15b-tetrahydro-3H-dibenzo[b,f]pyrrolo[2',3':7,8]chromeno[4,3,2-hi]indolizine (6bb)**

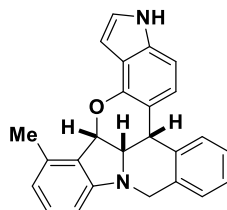

White solid; 32.4 mg, 89% yield, mp 170-171 °C; direct filtration purification.  $^1\text{H}$  NMR (500 MHz,  $\text{DMSO-d}_6$ )  $\delta$  10.87 (s, 1H), 7.45 – 7.44 (m, 1H), 7.38 – 7.32 (m, 1H), 7.11 (t,  $J = 2.5$  Hz, 1H), 6.94 (t,  $J = 7.5$  Hz, 1H), 6.76 (d,  $J = 8.5$  Hz, 1H), 6.41 (d,  $J = 7.5$  Hz, 1H), 6.27 (d,  $J = 8.5$  Hz, 2H), 6.22 (d,  $J = 7.5$  Hz, 1H), 6.04 (d,  $J = 7.5$  Hz, 1H),

4.40 – 4.37 (m, 2H), 4.21 (dd,  $J = 21.0, 15.5$  Hz, 2H), 3.36 (s, 2H), 2.50 (s, 3H).  $^{13}\text{C}$  NMR (126 MHz, DMSO- $d_6$ )  $\delta$  152.39, 147.48, 136.86, 136.53, 136.00, 134.04, 131.62, 130.65, 127.82, 127.47, 127.01, 126.73, 124.82, 120.93, 119.76, 119.24, 115.21, 104.89, 104.59, 98.20, 76.59, 62.36, 46.73, 37.17, 18.22. HRMS (ESI-TOF):  $m/z$   $[\text{M} + \text{H}]^+$  calcd for  $\text{C}_{25}\text{H}_{21}\text{N}_2\text{O}$ : 365.1648, found: 365.1651.

***(5bS,5b1S,15bS)-15-fluoro-5b,5b1,10,15b-tetrahydro-3H-dibenzo[b,f]pyrrolo[2',3':7,8]chromeno[4,3,2-hi]indolizine (6cb)***

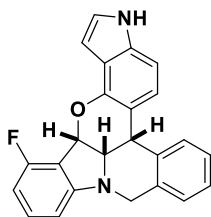

White solid; 28.7 mg, 78% yield, mp 218–220 °C; direct filtration purification.  $^1\text{H}$  NMR (500 MHz,  $\text{CDCl}_3$ )  $\delta$  7.83 (s, 1H), 7.45 – 7.42 (m, 1H), 7.37 (m, 2H), 7.28 – 7.26 (m, 1H), 6.99 – 6.94 (m, 2H), 6.73 (d,  $J = 8.5$  Hz, 1H), 6.56 (t,  $J = 2.5$  Hz, 1H), 6.38 (d,  $J = 8.5$  Hz, 1H), 6.29 (t,  $J = 8.5$  Hz, 1H), 6.19 (d,  $J = 8.0$  Hz, 1H), 6.01 (d,  $J = 8.0$  Hz, 1H), 4.51 (dd,  $J = 8.0, 3.5$  Hz, 1H), 4.42 (d,  $J = 3.5$  Hz, 1H), 4.23 (dd,  $J = 55, 15.0$  Hz, 2H).  $^{13}\text{C}$  NMR (126 MHz,  $\text{CDCl}_3$ )  $\delta$  161.79, 159.81, 154.28 (d,  $J = 8.3$  Hz, 1C), 147.26, 136.49, 135.25, 133.16, 132.35 (d,  $J = 9.2$  Hz, 1C), 131.27, 127.33 (d,  $J = 8.6$  Hz, 1C), 126.58, 123.53, 121.31, 119.84, 115.73, 113.69 (d,  $J = 20.2$  Hz, 1C), 104.63, 104.47, 102.07 (d,  $J = 2.6$  Hz, 1C), 99.61, 75.20, 63.14, 46.65, 37.67.  $^{19}\text{F}$  NMR (470 MHz,  $\text{CDCl}_3$ )  $\delta$  -118.64. HRMS (ESI-TOF):  $m/z$   $[\text{M} + \text{H}]^+$  calcd for  $\text{C}_{24}\text{H}_{18}\text{FN}_2\text{O}$ : 369.1398, found: 369.1399.

***(5bS,5b1S,15bS)-15-chloro-5b,5b1,10,15b-tetrahydro-3H-dibenzo[b,f]pyrrolo[2',3':7,8]chromeno[4,3,2-hi]indolizine (6db)***

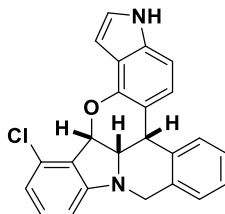

White solid; 27.7 mg, 72% yield, mp 140–141 °C; direct filtration purification.  $^1\text{H}$  NMR (500 MHz, DMSO- $d_6$ )  $\delta$  10.89 (s, 1H), 7.49 – 4.48 (m, 1H), 7.41 – 7.36 (m, 2H), 7.35

– 7.33 (m, 1H), 7.12 (t,  $J = 2.5$  Hz, 1H), 7.04 (t,  $J = 7.5$  Hz, 1H), 6.78 (d,  $J = 8.0$  Hz, 1H), 6.57 (d,  $J = 8.0$  Hz, 1H), 6.33 (d,  $J = 8.0$  Hz, 1H), 6.29 (t,  $J = 2.5$  Hz, 1H), 6.21 (d,  $J = 8.0$  Hz, 1H), 6.08 (d,  $J = 8.0$  Hz, 1H), 4.53 (dd,  $J = 8.0, 3.5$  Hz, 1H), 4.41 (d,  $J = 3.5$  Hz, 1H), 4.25 (dd,  $J = 55.0, 15.5$  Hz, 2H).  $^{13}\text{C}$  NMR (126 MHz, DMSO- $d_6$ )  $\delta$  153.84, 146.99, 136.90, 135.55, 133.46, 132.53, 131.86, 131.64, 127.81, 127.64, 126.87, 125.73, 124.98, 120.73, 119.93, 117.35, 115.47, 105.41, 105.31, 98.25, 76.41, 62.25, 46.32, 37.09. HRMS (ESI-TOF):  $m/z$   $[\text{M} + \text{H}]^+$  calcd for  $\text{C}_{24}\text{H}_{18}\text{ClN}_2\text{O}$ : 385.1102, found: 385.1105.

***(5bS,5b1S,15bS)-14-methyl-5b,5b1,10,15b-tetrahydro-3H-dibenzo[b,f]pyrrolo[2',3':7,8]chromeno[4,3,2-hi]indolizine (6eb)***

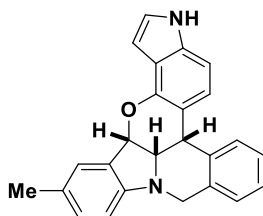

White solid; 33.9 mg, 93% yield, mp 194–196 °C; direct filtration purification.  $^1\text{H}$  NMR (500 MHz,  $\text{CDCl}_3$ )  $\delta$  7.77 (s, 1H), 7.37 – 7.34 (m, 1H), 7.30 – 7.26 (m, 1H), 7.25 (d,  $J = 1.5$  Hz, 1H), 7.21 – 7.19 (m, 1H), 7.18 (s, 1H), 6.88 – 6.88 (m, 1H), 6.83 (dd,  $J = 8.0, 2.0$  Hz, 1H), 6.65 (dd,  $J = 8.5, 1.0$  Hz, 1H), 6.46 – 6.43 (m, 2H), 6.22 (d,  $J = 8.0$  Hz, 1H), 5.81 (d,  $J = 8.0$  Hz, 1H), 4.35 (d,  $J = 4.0$  Hz, 1H), 4.29 (dd,  $J = 7.5, 3.5$  Hz, 1H), 4.16 (dd,  $J = 25.5, 15.0$  Hz, 1H), 2.18 (s, 3H).  $^{13}\text{C}$  NMR (126 MHz,  $\text{CDCl}_3$ )  $\delta$  150.21, 147.72, 136.39, 135.75, 133.90, 131.32, 130.77, 128.81, 127.46, 127.26, 127.10, 126.74, 126.38, 123.24, 121.64, 119.43, 114.82, 106.82, 104.04, 99.70, 63.14, 47.52, 37.35, 20.80. HRMS (ESI-TOF):  $m/z$   $[\text{M} + \text{H}]^+$  calcd for  $\text{C}_{25}\text{H}_{21}\text{ClN}_2\text{O}$ : 365.1648, found: 365.1650.

***(5bS,5b1S,15bS)-14-methoxy-5b,5b1,10,15b-tetrahydro-3H-dibenzo[b,f]pyrrolo[2',3':7,8]chromeno[4,3,2-hi]indolizine (6fb)***

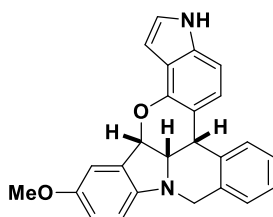

White solid; 28.1 mg, 74% yield, mp 189-191 °C; direct filtration purification. <sup>1</sup>H NMR (500 MHz, DMSO-d<sub>6</sub>) δ 10.86 (s, 1H), 7.46 (dd, *J* = 6.5, 2.0 Hz, 1H), 7.38 – 7.31 (m, 3H), 7.11 (t, *J* = 3.5 Hz, 2H), 6.76 (d, *J* = 8.5 Hz, 1H), 6.72 (dd, *J* = 8.5, 2.5 Hz, 1H), 6.43 (d, *J* = 8.0 Hz, 1H), 6.36 (d, *J* = 8.5 Hz, 1H), 6.29 (t, *J* = 2.5 Hz, 1H), 5.86 (d, *J* = 7.5 Hz, 1H), 4.39 (d, *J* = 3.5 Hz, 1H), 4.27 (dd, *J* = 7.5, 3.5 Hz, 1H), 4.17 (dd, *J* = 28.0, 15.0 Hz, 2H), 3.67 (s, 3H). <sup>13</sup>C NMR (126 MHz, DMSO-d<sub>6</sub>) δ 152.24, 146.88, 146.45, 136.13, 135.54, 133.67, 131.97, 129.71, 127.16, 126.78, 126.09, 124.09, 120.31, 118.78, 115.31, 113.40, 112.25, 107.52, 104.15, 97.78, 76.37, 62.66, 55.48, 47.41, 36.15. HRMS (ESI-TOF): *m/z* [M + H]<sup>+</sup> calcd for C<sub>25</sub>H<sub>21</sub>N<sub>2</sub>O<sub>2</sub>:381.1598, found: 381.1598.

**(5*bS*,5*b1S*,15*bS*)-14-fluoro-5*b*,5*b1*,10,15*b*-tetrahydro-3*H*-dibenzo[*b,f*]pyrrolo[2',3':7,8]chromeno[4,3,2-*hi*]indolizine (6*gb*)**

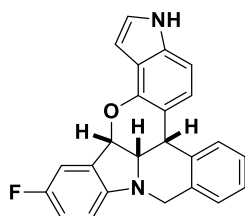

White solid; 22.8 mg, 62% yield, mp 198-190 °C; column chromatography eluent, petroleum ether/EtOAc = 5:1. <sup>1</sup>H NMR (500 MHz, DMSO-d<sub>6</sub>) δ 10.89 (s, 1H), 7.46 – 7.44 (m, 1H), 7.41 – 7.35 (m, 3H), 7.32 – 7.30 (m, 1H), 7.12 (t, *J* = 2.5 Hz, 1H), 6.78 (d, *J* = 8.0 Hz, 1H), 6.34 – 6.21 (m, 4H), 5.93 (d, *J* = 8.0 Hz, 1H), 4.50 (dd, *J* = 8.0, 4.0 Hz, 1H), 4.38 (d, *J* = 4.0 Hz, 1H), 4.25 (dd, *J* = 28.5, 16.0 Hz, 2H). <sup>13</sup>C NMR (126 MHz, DMSO-d<sub>6</sub>) δ 166.04, 164.12, 154.24 (d, *J* = 13.2 Hz, 1C), 147.20, 136.91, 135.62, 133.48, 131.71, 127.68 (d, *J* = 19.5 Hz, 1C), 127.45 (d, *J* = 11.5 Hz, 1C), 126.82, 124.94, 124.92, 120.88, 119.82, 115.13, 105.14, 103.41 (d, *J* = 23.4 Hz, 1C), 98.33, 94.30 (d, *J* = 27.3 Hz, 1C), 76.48, 63.23, 46.25, 37.06. <sup>19</sup>F NMR (470 MHz, CDCl<sub>3</sub>) δ -127.13. HRMS (ESI-TOF): *m/z* [M + H]<sup>+</sup> calcd for C<sub>24</sub>H<sub>18</sub>FN<sub>2</sub>O:369.1398, found: 369.1398.

**(5*bS*,5*b1S*,15*bS*)-14-chloro-5*b*,5*b1*,10,15*b*-tetrahydro-3*H*-dibenzo[*b,f*]pyrrolo[2',3':7,8]chromeno[4,3,2-*hi*]indolizine (6*hb*)**

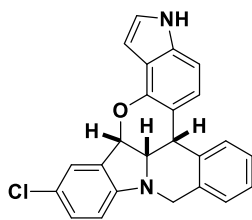

White solid; 22.3 mg, 58% yield, mp 168-170 °C; column chromatography eluent, petroleum ether/EtOAc = 5:1. **<sup>1</sup>H NMR (500 MHz, DMSO-*d*<sub>6</sub>)** δ 7.88 (s, 1H), 7.46 – 7.42 (m, 2H), 7.36 (qd, *J* = 13.0, 9.5, 7.5, 2.0 Hz, 2H), 7.28 – 7.27 (m, 1H), 7.00 – 6.98 (m, 2H), 6.76 (d, *J* = 8.5 Hz, 1H), 6.54 (t, *J* = 2.5 Hz, 1H), 6.42 (d, *J* = 8.5 Hz, 1H), 6.19 (d, *J* = 8.0 Hz, 1H), 5.92 (d, *J* = 8.0 Hz, 1H), 4.48 (dd, *J* = 8.5, 4.0 Hz, 1H), 4.41 (d, *J* = 3.5 Hz, 1H), 4.22 (dd, *J* = 48.5, 15.0 Hz, 2H). **<sup>13</sup>C NMR (126 MHz, DMSO-*d*<sub>6</sub>)** δ 151.29, 147.16, 136.92, 135.59, 133.56, 131.68, 130.91, 130.33, 127.82, 127.58, 126.82, 126.20, 125.01, 120.91, 120.76, 119.71, 114.88, 108.00, 105.23, 98.35, 76.64, 62.74, 46.57, 36.90. HRMS (ESI-TOF): *m/z* [M + H]<sup>+</sup> calcd for C<sub>24</sub>H<sub>18</sub>ClN<sub>2</sub>O:385.1102, found: 385.1105.

**(5*bS*,5*b1S*,15*bS*)-13-fluoro-5*b*,5*b1*,10,15*b*-tetrahydro-3*H*-dibenzo[*b,f*]pyrrolo[2',3':7,8]chromeno[4,3,2-*hi*]indolizine (6*ib*)**

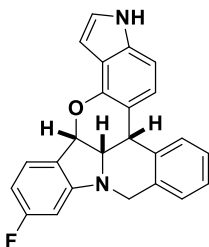

White solid; 26.2 mg, 71% yield, mp 198-199 °C; direct filtration purification. **<sup>1</sup>H NMR (500 MHz, DMSO-*d*<sub>6</sub>)** δ 10.89 (s, 1H), 7.47 – 7.43 (m, 1H), 7.42 – 7.34 (m, 3H), 7.34 – 7.29 (m, 1H), 7.12 (t, *J* = 2.7 Hz, 1H), 6.78 (d, *J* = 8.3 Hz, 1H), 6.35 – 6.30 (m, 1H), 6.29 (s, 1H), 6.25 (d, *J* = 8.4 Hz, 1H), 6.22 (dd, *J* = 10.5, 2.4 Hz, 1H), 5.93 (d, *J* = 8.0 Hz, 1H), 4.50 (dd, *J* = 8.1, 3.7 Hz, 1H), 4.38 (d, *J* = 3.7 Hz, 1H), 4.25 (q, *J* = 15.8 Hz, 2H). **<sup>13</sup>C NMR (126 MHz, DMSO-*d*<sub>6</sub>)** δ 166.04, 164.12, 154.24 (d, *J* = 13.2 Hz, 1C), 147.20, 136.91, 135.63, 133.48, 131.71, 127.76, 127.61, 127.45 (d, *J* = 11.6 Hz, 1C), 126.82, 124.94, 120.88, 119.82, 115.13, 105.14, 103.41 (d, *J* = 23.4 Hz, 1C), 98.33, 94.30 (d, *J* = 27.3 Hz, 1C), 76.48, 63.23, 46.25, 37.06. **<sup>19</sup>F NMR (470 MHz, CDCl<sub>3</sub>)** δ

-111.62. HRMS (ESI-TOF):  $m/z$   $[M + H]^+$  calcd for  $C_{24}H_{18}FN_2O$ :369.1398, found: 369.1398.

**(5*bS*,5*b1S*,15*bS*)-13-methoxy-5*b*,5*b1*,10,15*b*-tetrahydro-3*H*-dibenzo[*b,f*]pyrrolo[2',3':7,8]chromeno[4,3,2-*hi*]indolizine (6*jb*)**

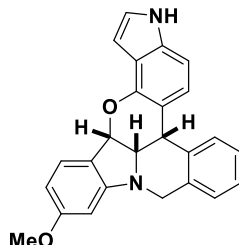

White solid; 32.0 mg, 84% yield, mp 197-199 °C; direct filtration purification.  $^1H$  NMR (500 MHz,  $CDCl_3$ )  $\delta$  7.91 (s, 1H), 7.46 – 7.42 (m, 1H), 7.39 – 7.34 (m, 3H), 7.31 – 7.29 (m, 1H), 6.99 (dd,  $J = 3.5, 2.5$  Hz, 1H), 6.76 (dd,  $J = 8.0, 1.0$  Hz, 1H), 6.53 (ddd,  $J = 3.0, 2.0, 1.0$  Hz, 1H), 6.42 (dd,  $J = 8.5, 1.0$  Hz, 1H), 6.18 (dd,  $J = 8.0, 2.5$  Hz, 1H), 5.93 (d,  $J = 8.0$  Hz, 1H), 5.88 (d,  $J = 2.5$  Hz, 1H), 4.50 (dd,  $J = 8.0, 3.5$  Hz, 1H), 4.41 (d,  $J = 3.5$  Hz, 1H), 4.26 (dd,  $J = 38.5, 15.0$  Hz, 2H), 3.71 (s, 3H).  $^{13}C$  NMR (126 MHz,  $CDCl_3$ )  $\delta$  162.27 153.62, 147.61, 136.46, 135.59, 133.52, 131.30, 127.43, 127.19, 126.69, 126.47, 123.35, 121.50, 120.99, 119.76, 115.74, 104.14, 102.64, 99.63, 92.92, 77.49, 63.50, 55.24, 46.63, 37.80. HRMS (ESI-TOF):  $m/z$   $[M + H]^+$  calcd for  $C_{25}H_{21}N_2O_2$ :381.1598, found: 381.1598.

**(5*bS*,5*b1S*,15*bS*)-5*b1*-methyl-5*b*,5*b1*,10,15*b*-tetrahydro-3*H*-dibenzo[*b,f*]pyrrolo[2',3':7,8]chromeno[4,3,2-*hi*]indolizine (6*kb*)**

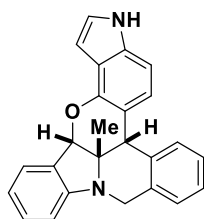

White solid; 14.6 mg, 40% yield, mp 198-200 °C; column chromatography eluent, petroleum ether/EtOAc = 5:1.  $^1H$  NMR (500 MHz,  $CDCl_3$ )  $\delta$  7.81 (s, 1H), 7.48 (dd,  $J = 7.5, 1.5$  Hz, 1H), 7.37 – 7.32 (m, 3H), 7.31 – 7.29 (m, 1H), 7.03 (td,  $J = 8.0, 1.5$  Hz, 1H), 6.95 (dd,  $J = 3.5, 2.5$  Hz, 1H), 6.70 (dd,  $J = 8.5, 1.0$  Hz, 1H), 6.59 (td,  $J = 7.0, 0.5$  Hz, 1H), 6.52 (ddd,  $J = 3.5, 2.0, 1.0$  Hz, 1H), 6.25 – 6.22 (m, 2H), 5.57 (s, 1H), 5.28 (s,



2H), 4.38 (d,  $J = 15.5$  Hz, 1H), 4.15 (s, 1H), 4.08 (dd,  $J = 15.0, 1.0$  Hz, 1H), 1.36 (s, 3H).  $^{13}\text{C}$  NMR (126 MHz,  $\text{CDCl}_3$ )  $\delta$  151.39, 147.34, 136.51, 135.23, 133.10, 131.41, 130.35, 127.17, 127.06, 126.81, 126.70, 126.33, 123.46, 121.20, 119.95, 117.75, 117.03, 106.09, 104.42, 99.44, 85.89, 67.31, 45.58, 44.50, 25.30. HRMS (ESI-TOF):  $m/z$   $[\text{M} + \text{H}]^+$  calcd for  $\text{C}_{25}\text{H}_{21}\text{N}_2\text{O}$ :365.1648, found: 365.1648.

***(5bS,5b1S,15bS)-15b-methyl-5b,5b1,10,15b-tetrahydro-3H-dibenzo[b,f]pyrrolo[2',3':7,8]chromeno[4,3,2-hi]indolizine (6lb)***

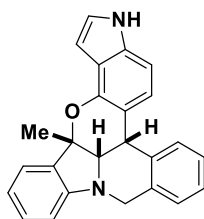

White solid; 28.4 mg, 78% yield, mp 201-203 °C; direct filtration purification.  $^1\text{H}$  NMR (500 MHz,  $\text{CDCl}_3$ )  $\delta$  7.66 (s, 1H), 7.46 – 7.44 (m, 1H), 7.41 (d,  $J = 7.5$  Hz, 1H), 7.38 – 7.32 (m, 2H), 7.26 (d,  $J = 6.0$  Hz, 1H), 7.01 (t,  $J = 8.0$  Hz, 1H), 6.83 – 6.82 (m, 1H), 6.63 (dd,  $J = 15.0, 7.5$  Hz, 2H), 6.46 (t,  $J = 2.5$  Hz, 1H), 6.41 (d,  $J = 8.5$  Hz, 1H), 6.25 (d,  $J = 7.5$  Hz, 1H), 4.35 (d,  $J = 3.5$  Hz, 1H), 4.22 (dd,  $J = 40.0, 15.0$  Hz, 2H), 4.11 (d,  $J = 3.5$  Hz, 1H), 1.99 (s, 3H).  $^{13}\text{C}$  NMR (126 MHz,  $\text{CDCl}_3$ )  $\delta$  151.27, 147.74, 136.37, 135.60, 133.64, 132.17, 131.25, 129.83, 127.40, 127.13, 126.40, 123.39, 123.22, 121.16, 119.32, 117.57, 114.87, 106.33, 104.00, 99.46, 83.15, 68.63, 47.02, 37.78, 26.03. HRMS (ESI-TOF):  $m/z$   $[\text{M} + \text{H}]^+$  calcd for  $\text{C}_{25}\text{H}_{21}\text{N}_2\text{O}$ :365.1648, found: 365.1649.

***(5bS,5b1S,15bS)-5b1,15b-dimethyl-5b,5b1,10,15b-tetrahydro-3H-dibenzo[b,f]pyrrolo[2',3':7,8]chromeno[4,3,2-hi]indolizine (6mb)***

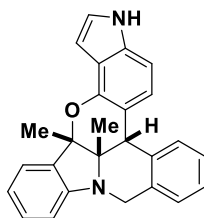

White solid; 19.3 mg, 51% yield, mp 198-200 °C; column chromatography eluent, petroleum ether/EtOAc = 5:1.  $^1\text{H}$  NMR (500 MHz,  $\text{CDCl}_3$ )  $\delta$  7.61 (s, 1H), 7.31 – 7.24 (m, 4H), 7.20 – 7.18 (m, 1H), 6.92 (td,  $J = 7.5, 1.0$  Hz, 1H), 6.79 (dd,  $J = 3.0, 2.0$  Hz,

1H), 6.55 (dd,  $J = 8.0, 0.5$  Hz, 1H), 6.50 (td,  $J = 7.5, 1.0$  Hz, 1H), 6.40 – 6.39 (m, 1H), 6.20 (d,  $J = 8.5$  Hz, 1H), 6.11 (d,  $J = 8.0$  Hz, 1H), 4.22 – 4.03 (m, 3H), 1.89 (s, 3H), 1.18 (s, 3H).  **$^{13}\text{C}$  NMR (126 MHz,  $\text{CDCl}_3$ )**  $\delta$  150.05, 147.63, 136.34, 136.08, 132.81, 131.62, 131.54, 129.96, 127.22, 126.95, 126.48, 123.48, 123.20, 121.43, 119.33, 116.88, 116.37, 105.81, 103.98, 99.55, 87.43, 69.38, 45.41, 44.44, 22.28, 21.25. HRMS (ESI-TOF):  $m/z$   $[\text{M} + \text{H}]^+$  calcd for  $\text{C}_{26}\text{H}_{23}\text{N}_2\text{O}$ : 379.1805, found: 379.1804.

## 6. $^1\text{H}$ and $^{13}\text{C}$ NMR Spectra

### 2-((1*H*-indol-1-yl)methyl)benzaldehyde (**1a**)

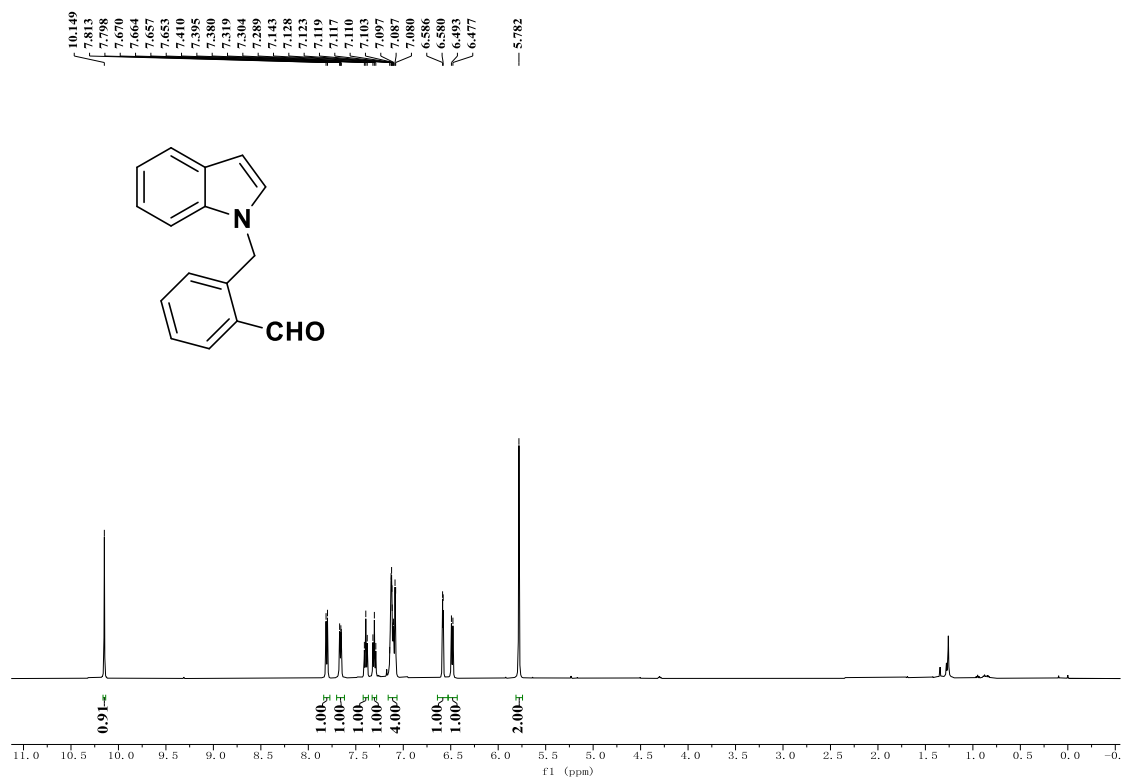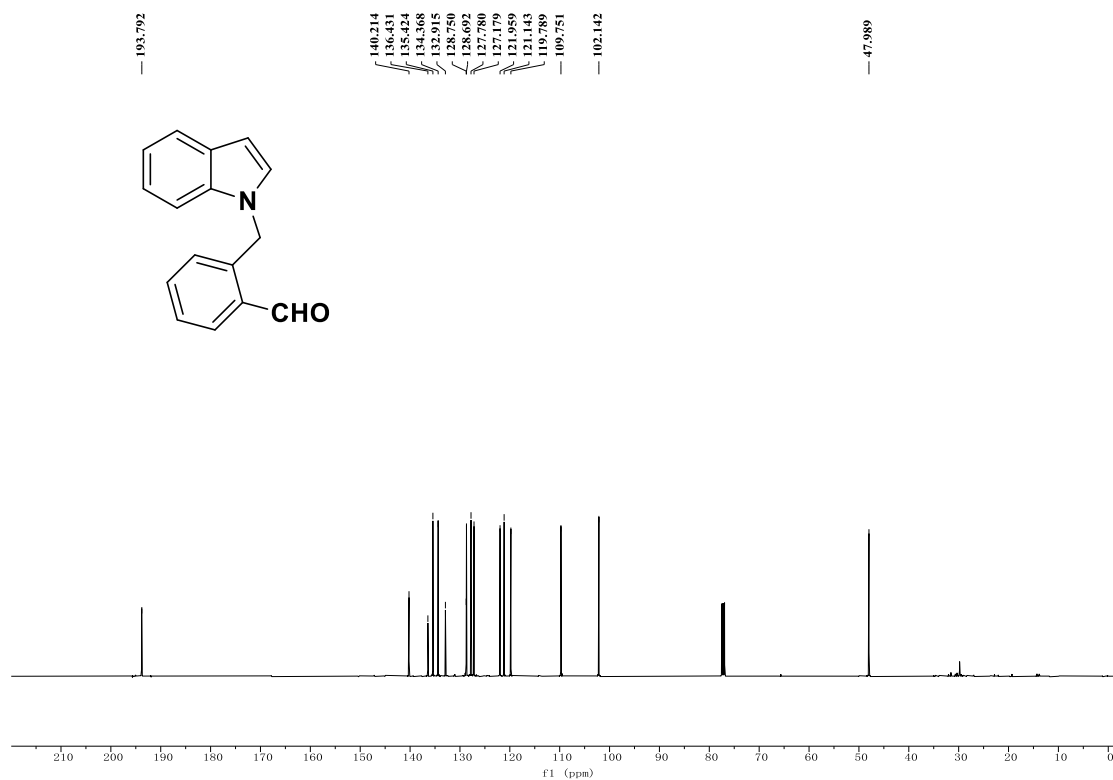

**2-((4-methyl-1H-indol-1-yl)methyl)benzaldehyde (1b)**

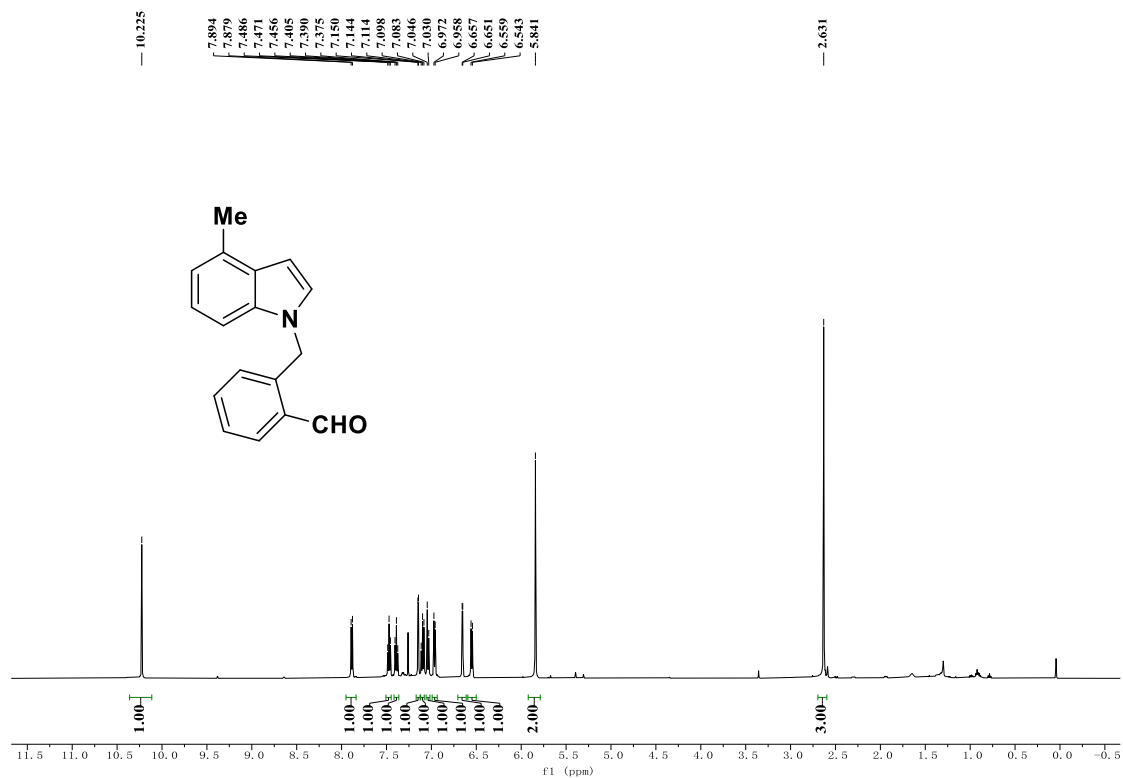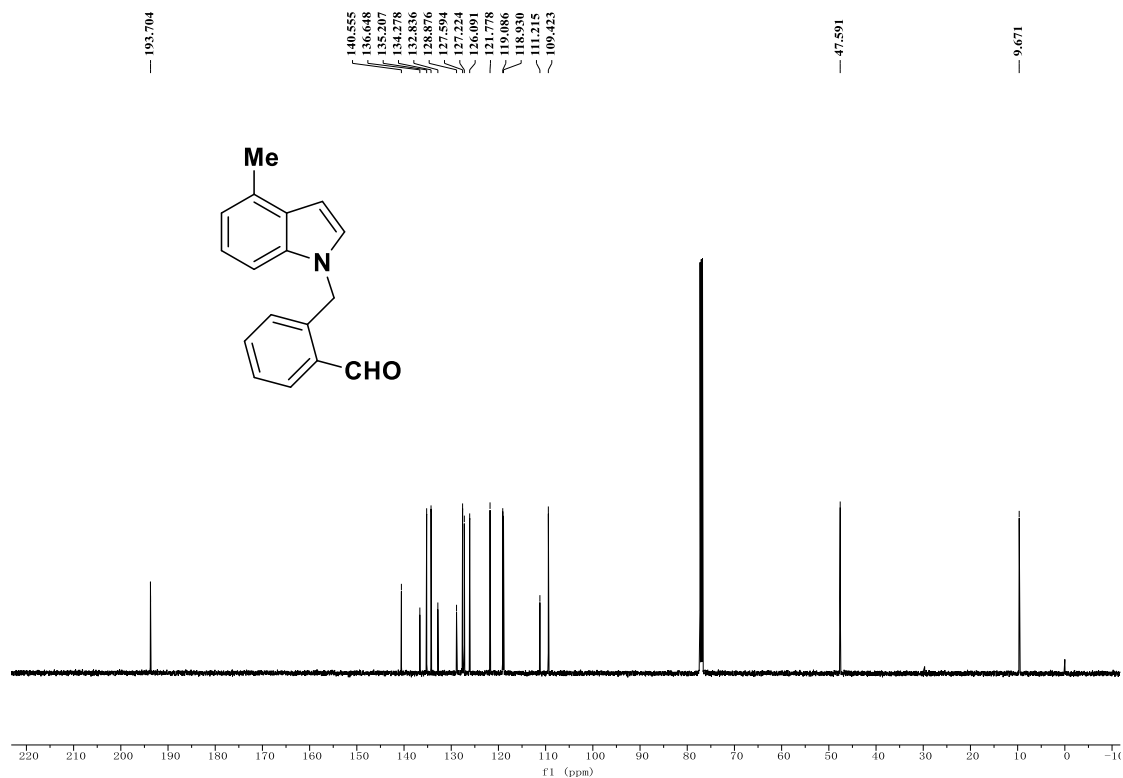

**2-((4-fluoro-1H-indol-1-yl)methyl)benzaldehyde (1c)**

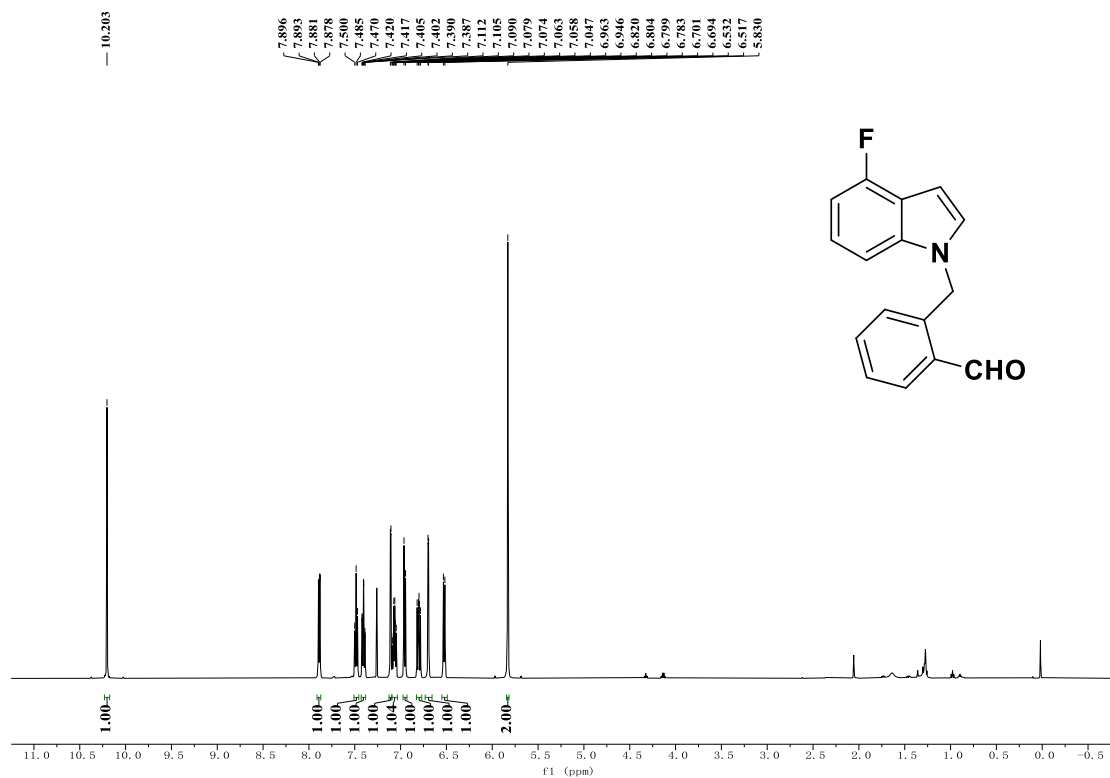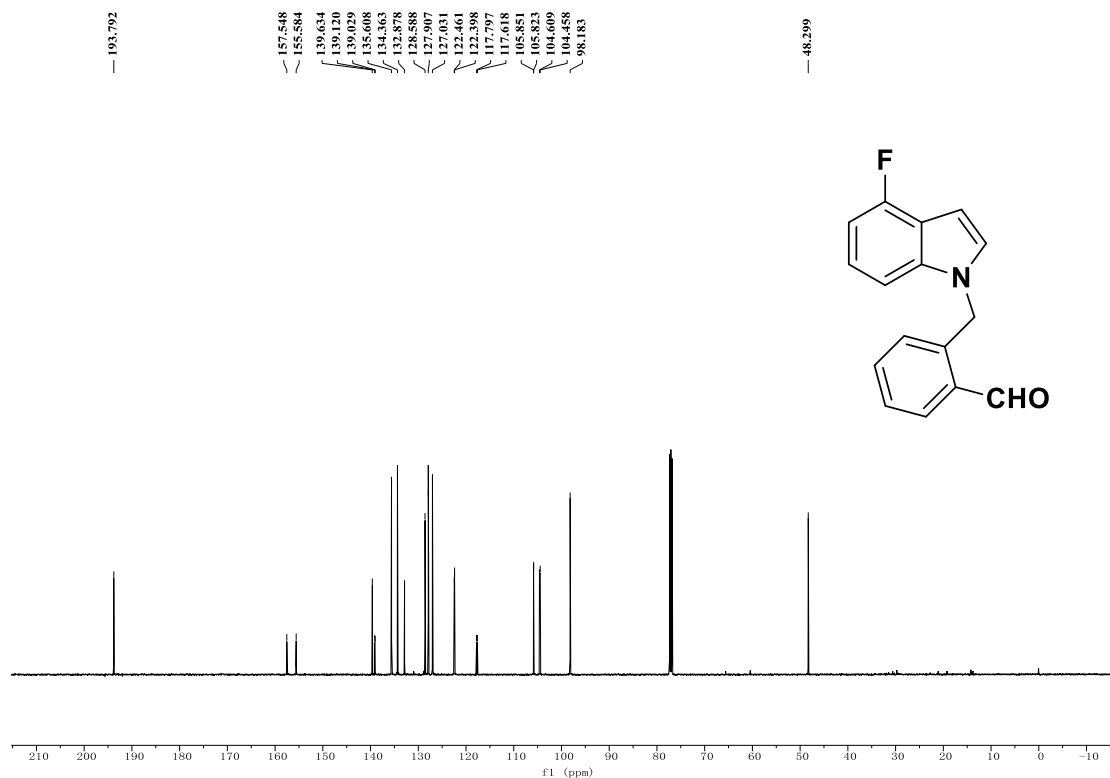

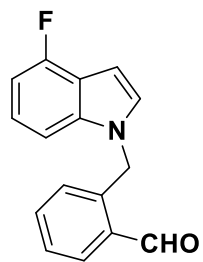

---121.798

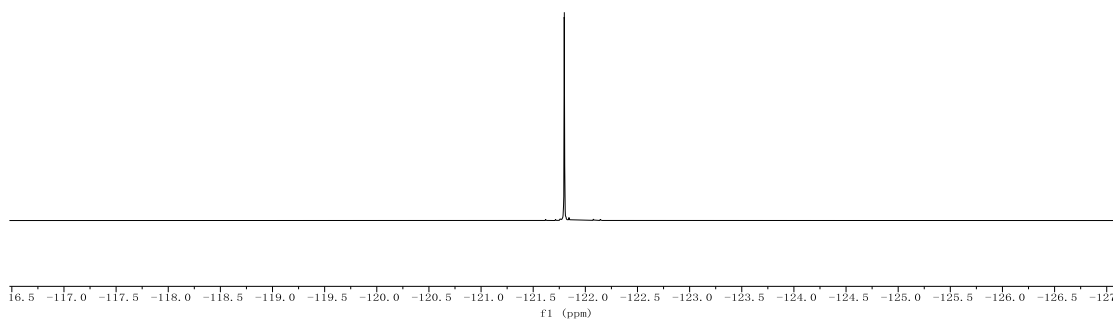

**2-((4-chloro-1H-indol-1-yl)methyl)benzaldehyde (1d)**

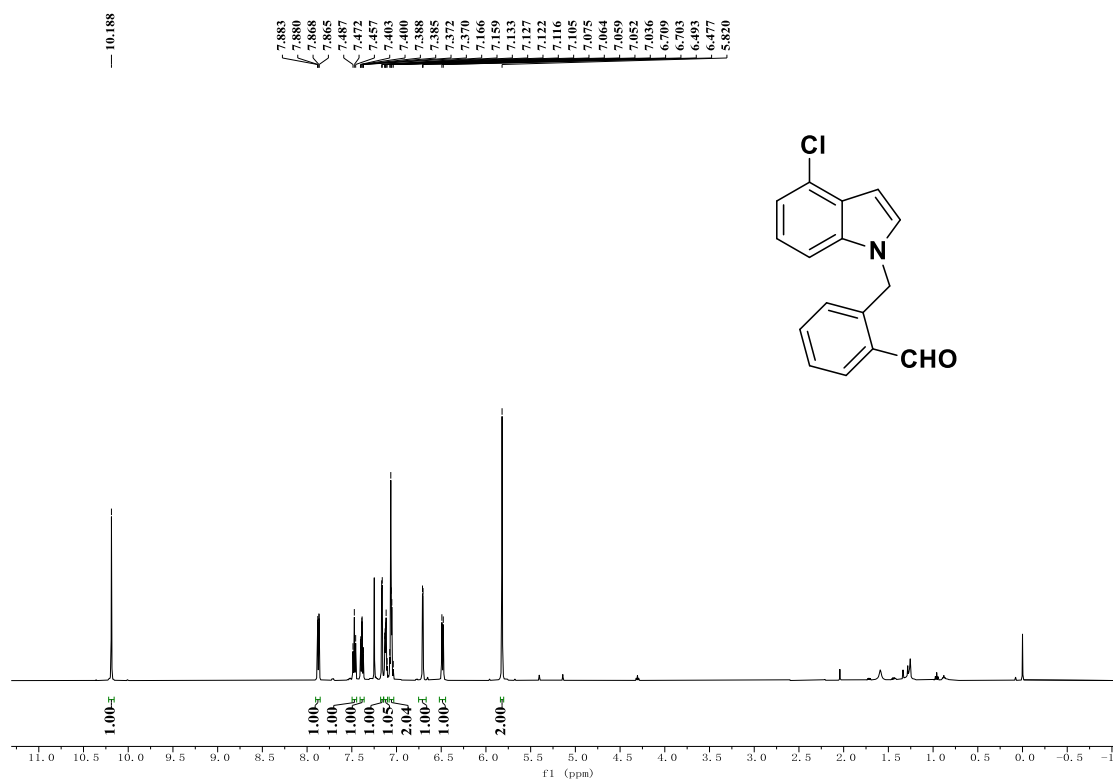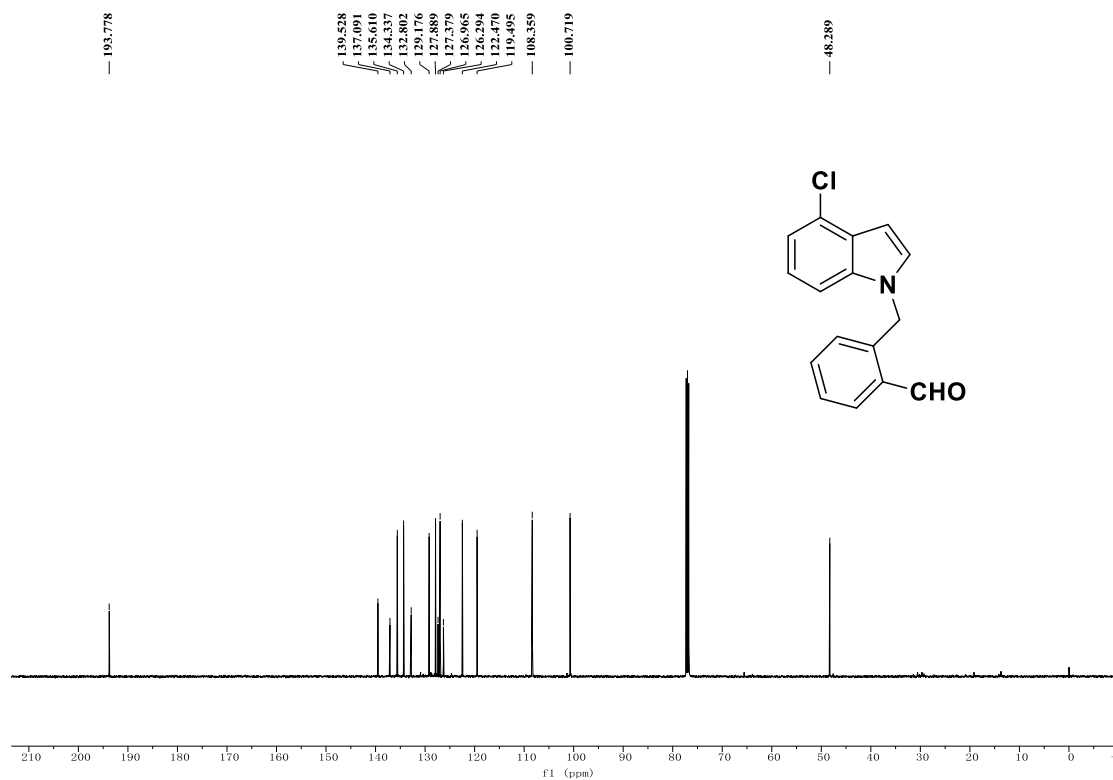

**2-((5-methyl-1H-indol-1-yl)methyl)benzaldehyde (1e)**

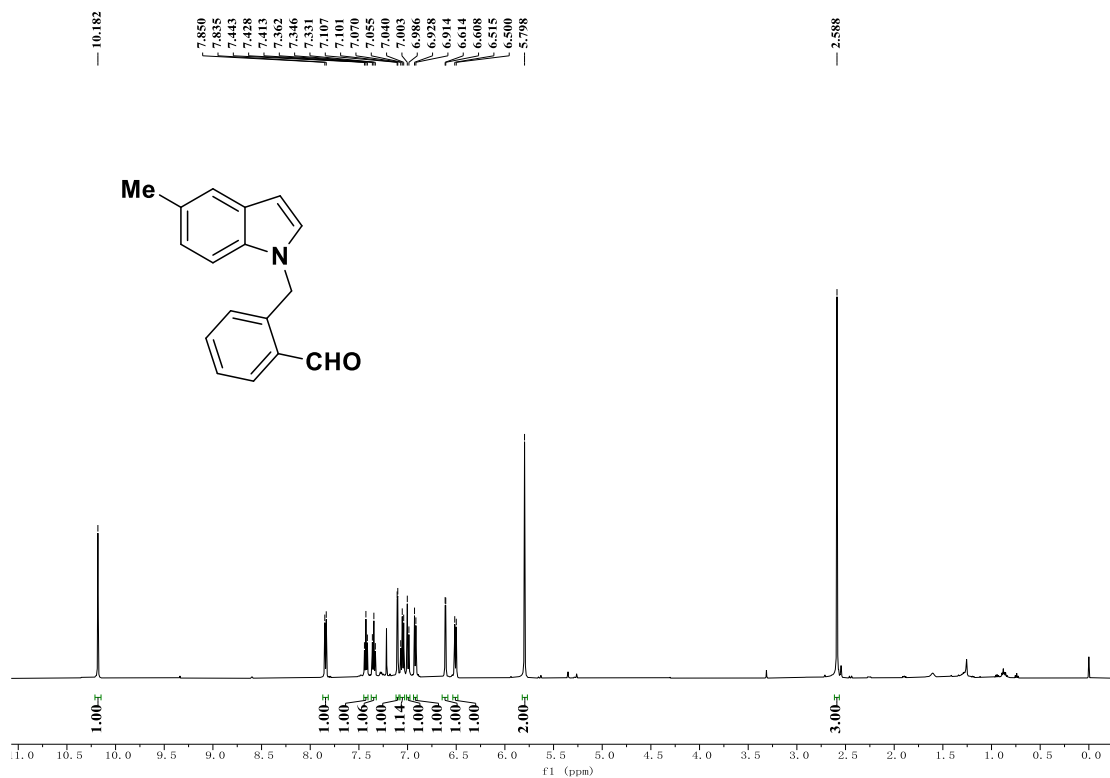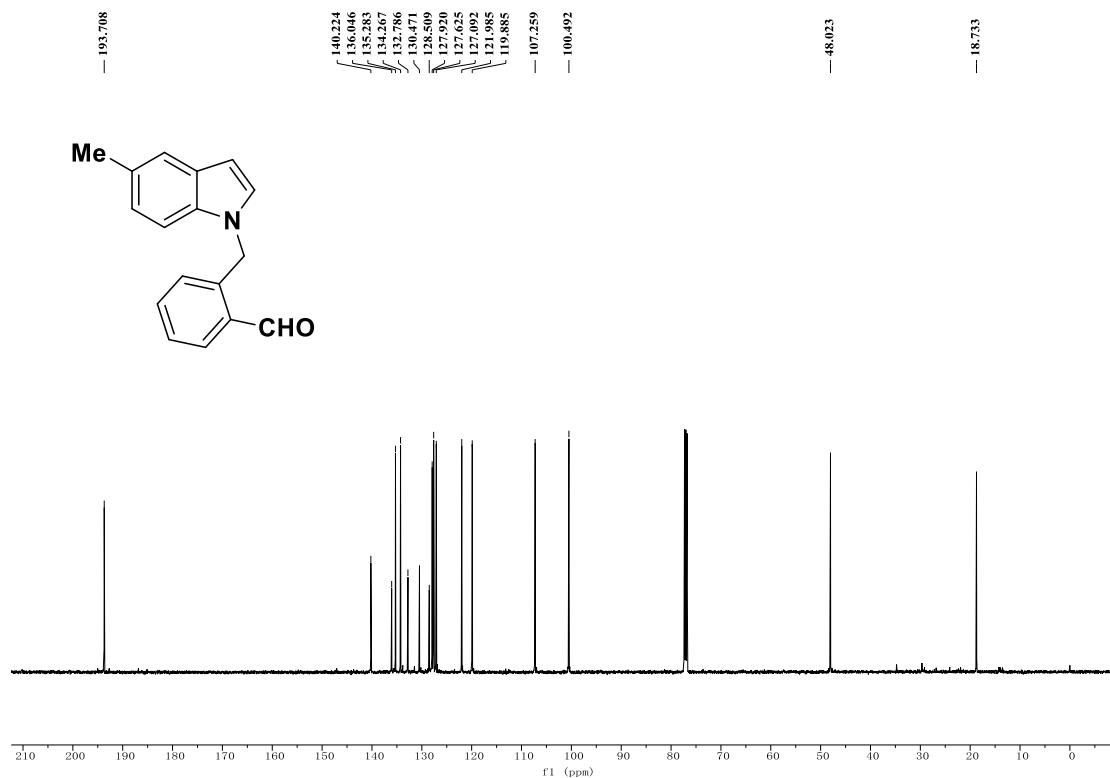



**2-((5-methoxy-1H-indol-1-yl)methyl)benzaldehyde (1f)**

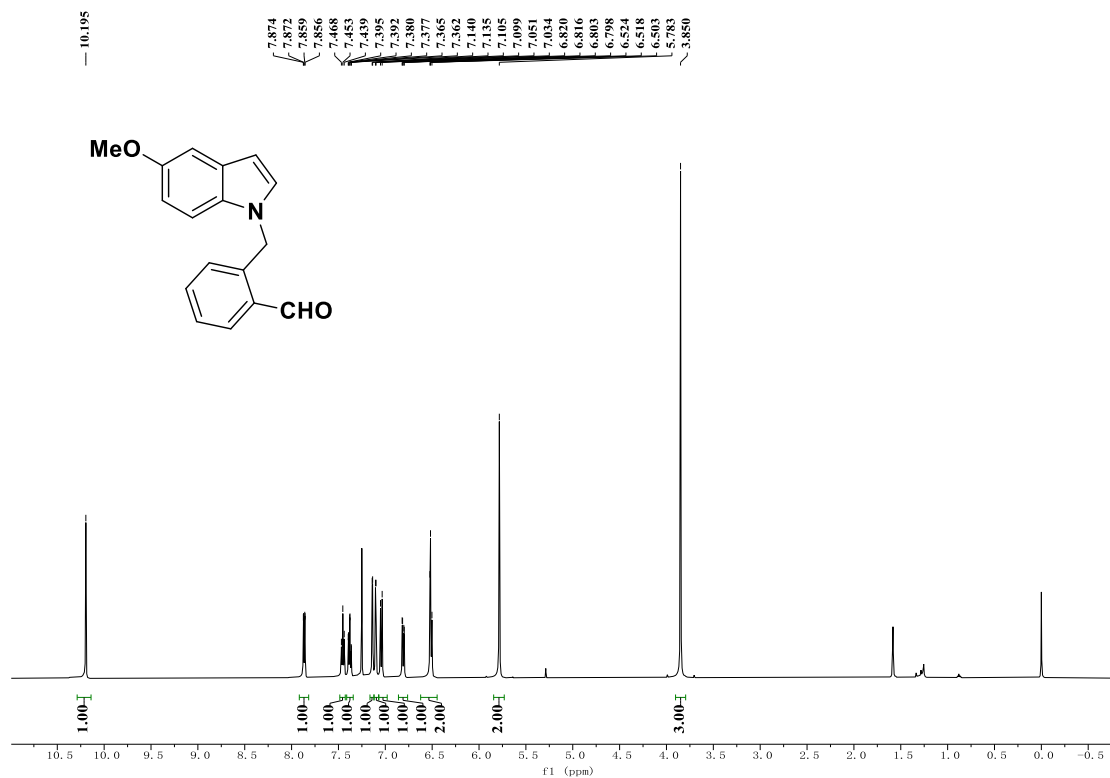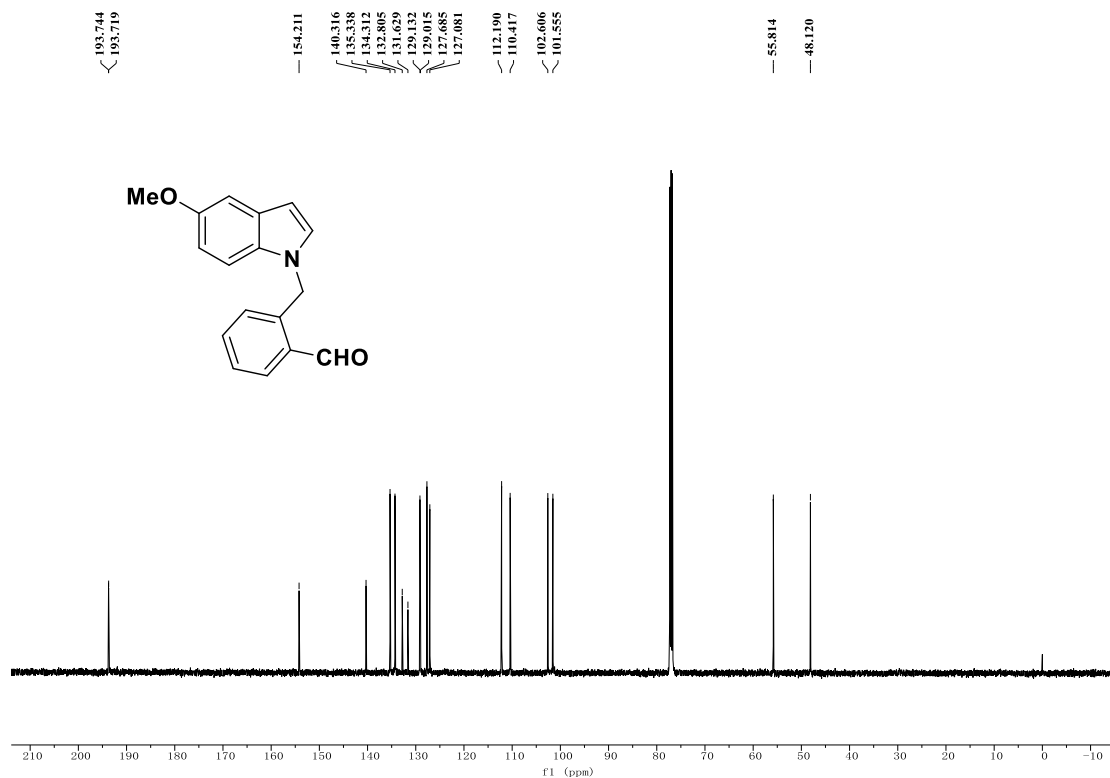

2-((5-fluoro-1H-indol-1-yl)methyl)benzaldehyde (1g)

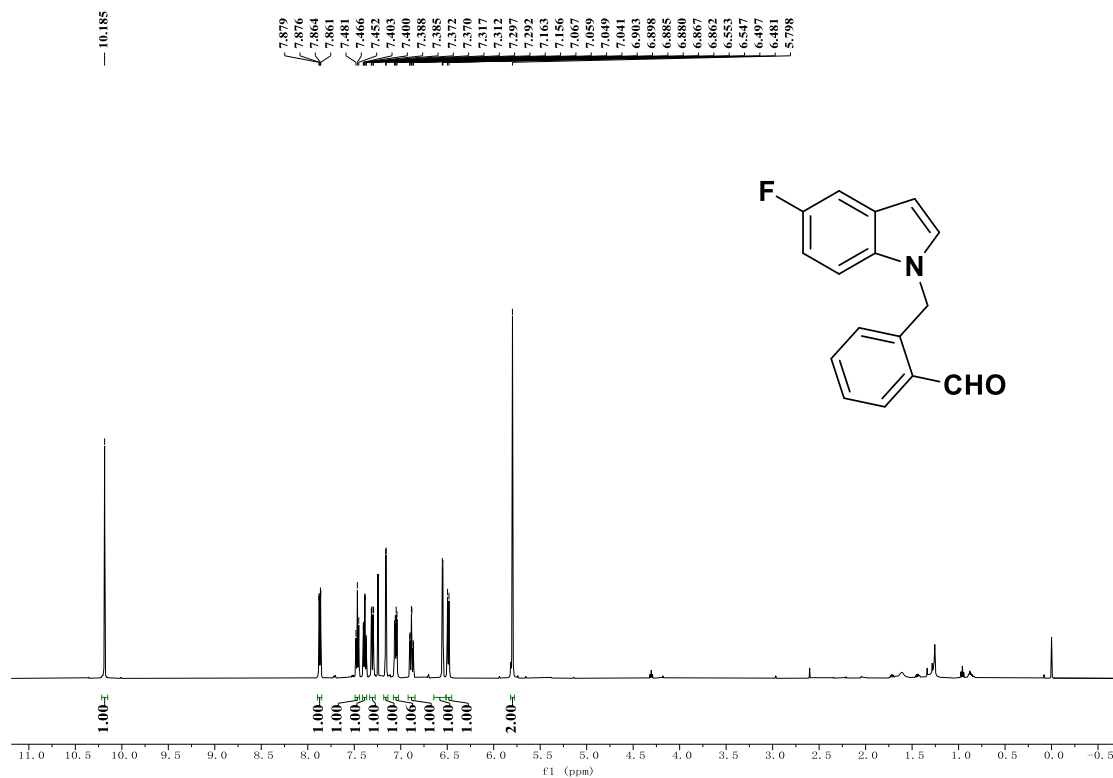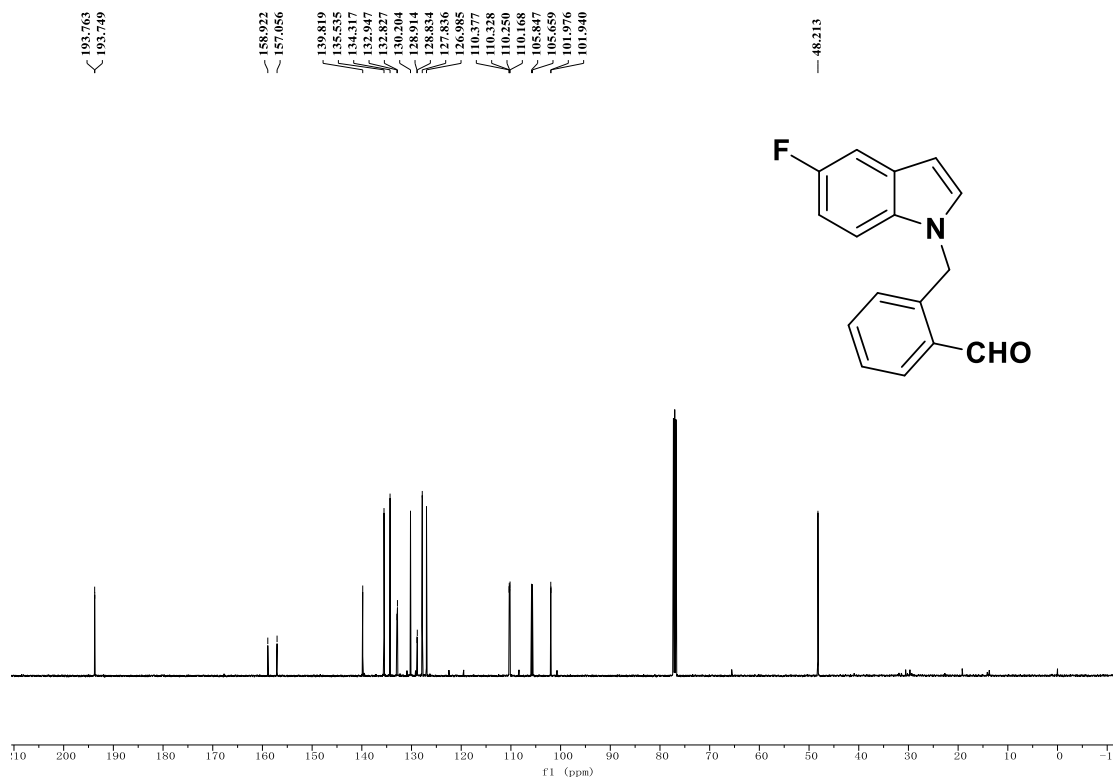

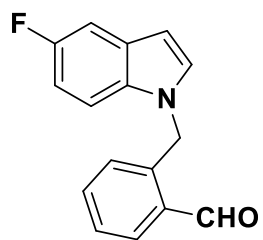

-124.987

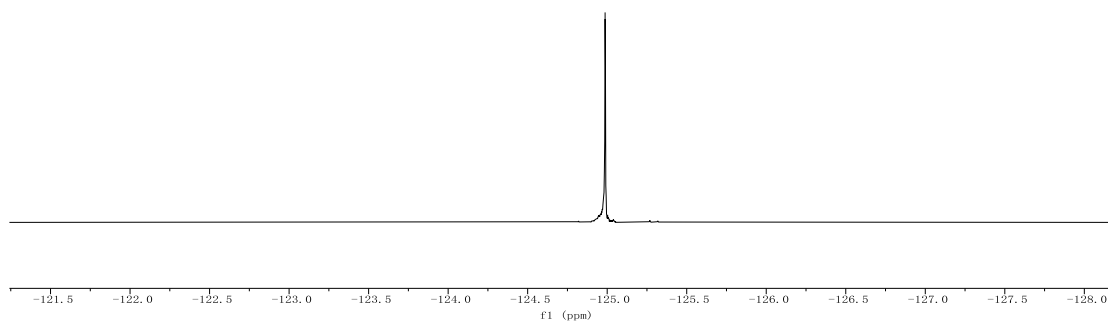

**2-((5-chloro-1H-indol-1-yl)methyl)benzaldehyde (1h)**

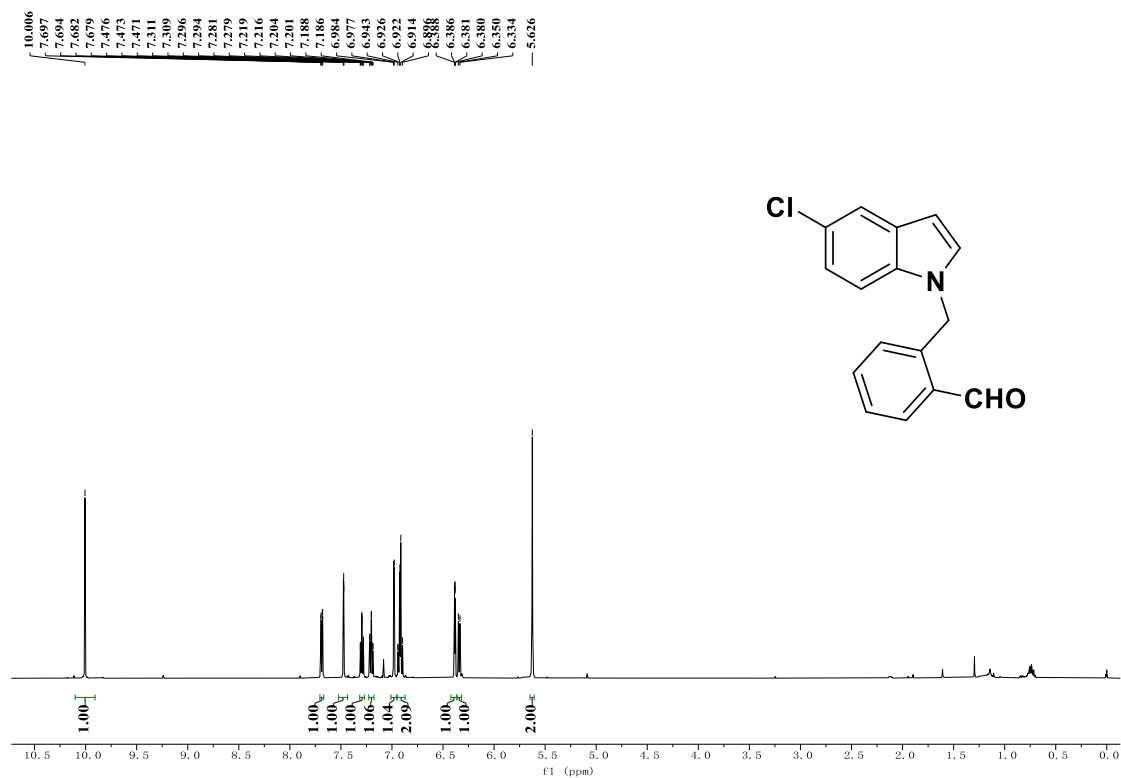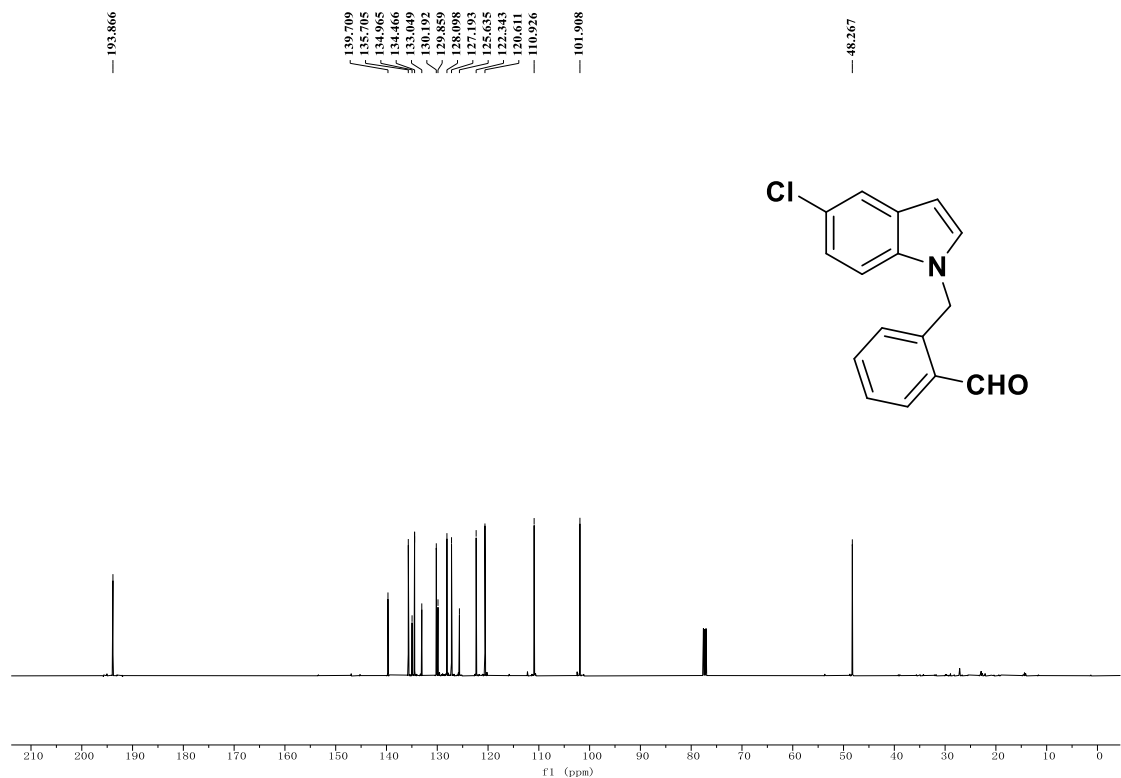

**2-((6-fluoro-1H-indol-1-yl)methyl)benzaldehyde (1i)**

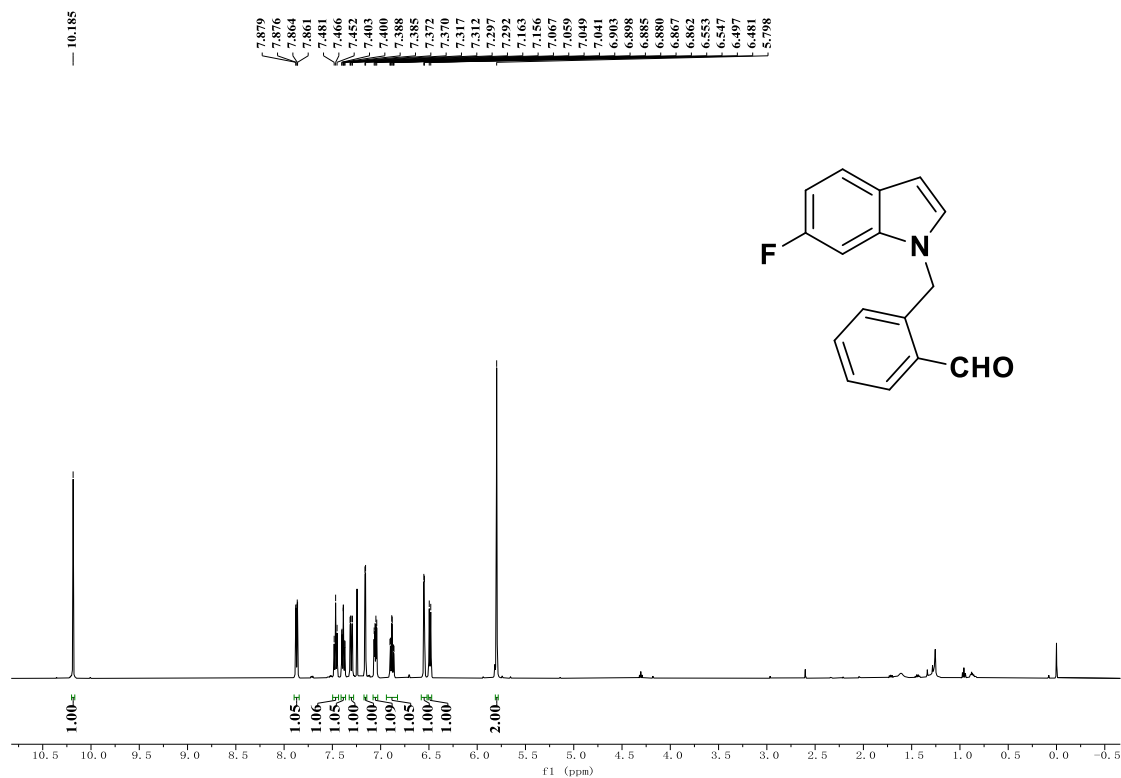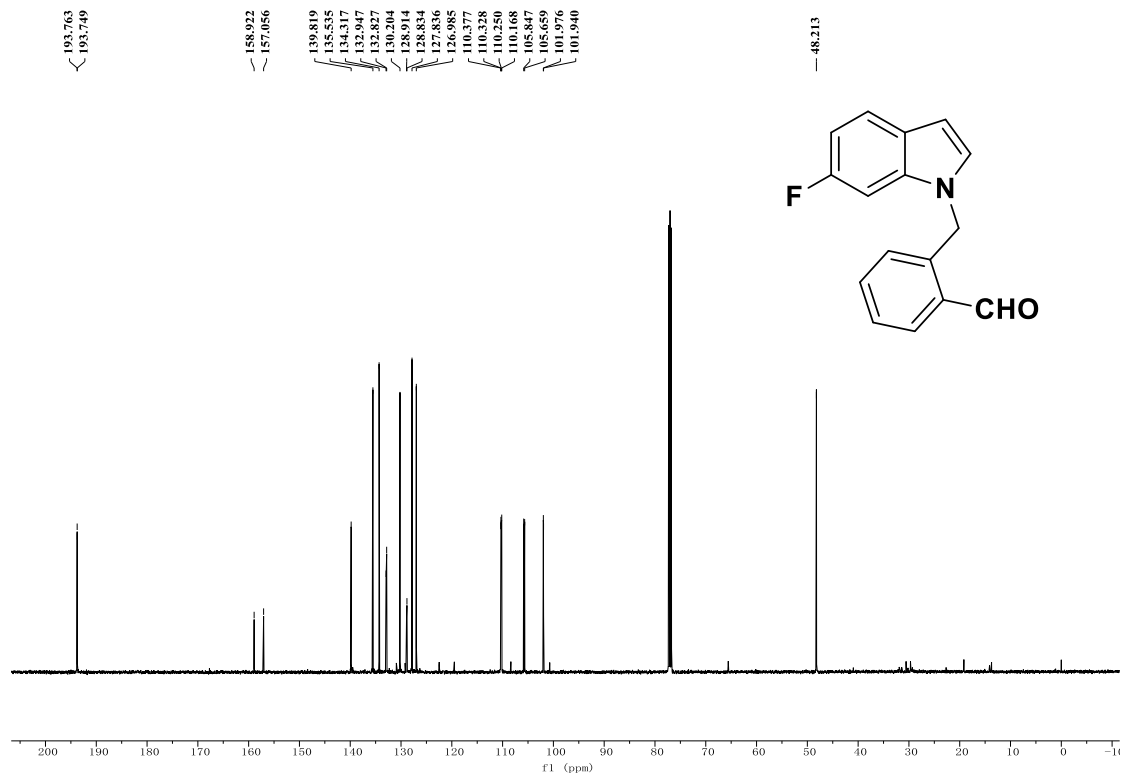

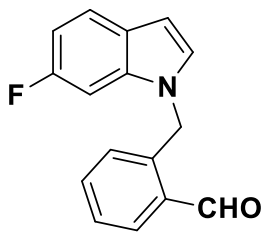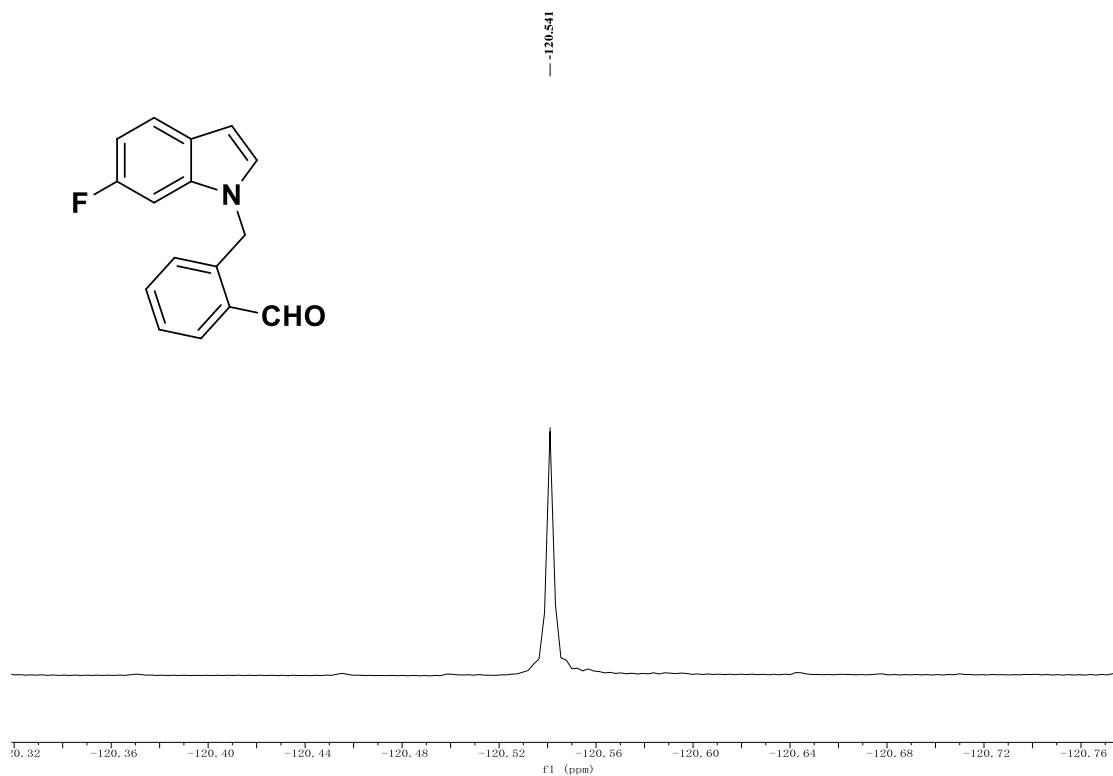

2-((6-methoxy-1H-indol-1-yl)methyl)benzaldehyde (1j)

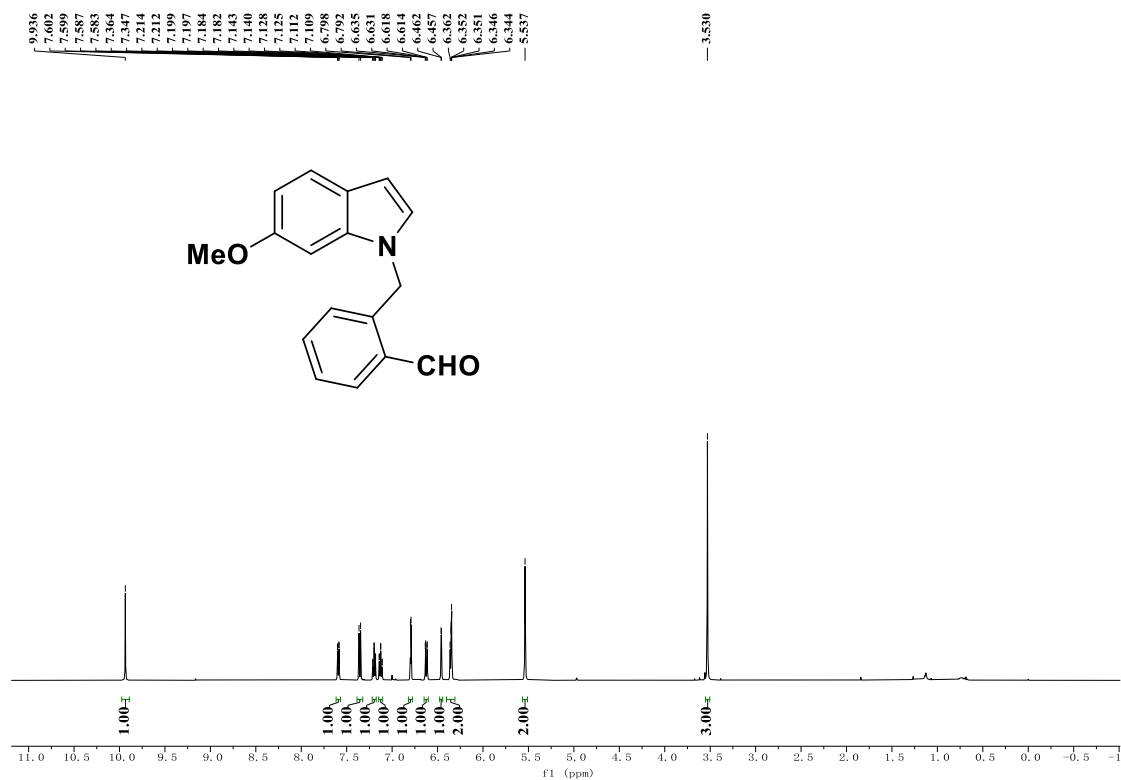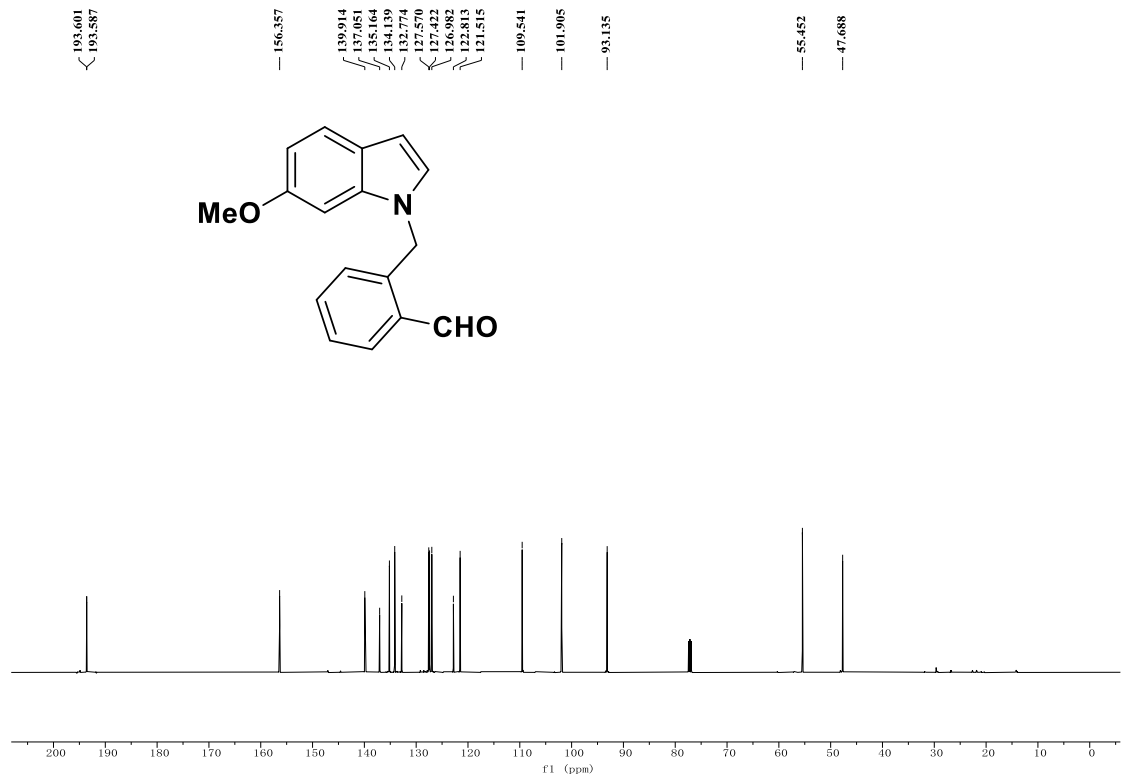

**2-((2-methyl-1H-indol-1-yl)methyl)benzaldehyde (1k)**

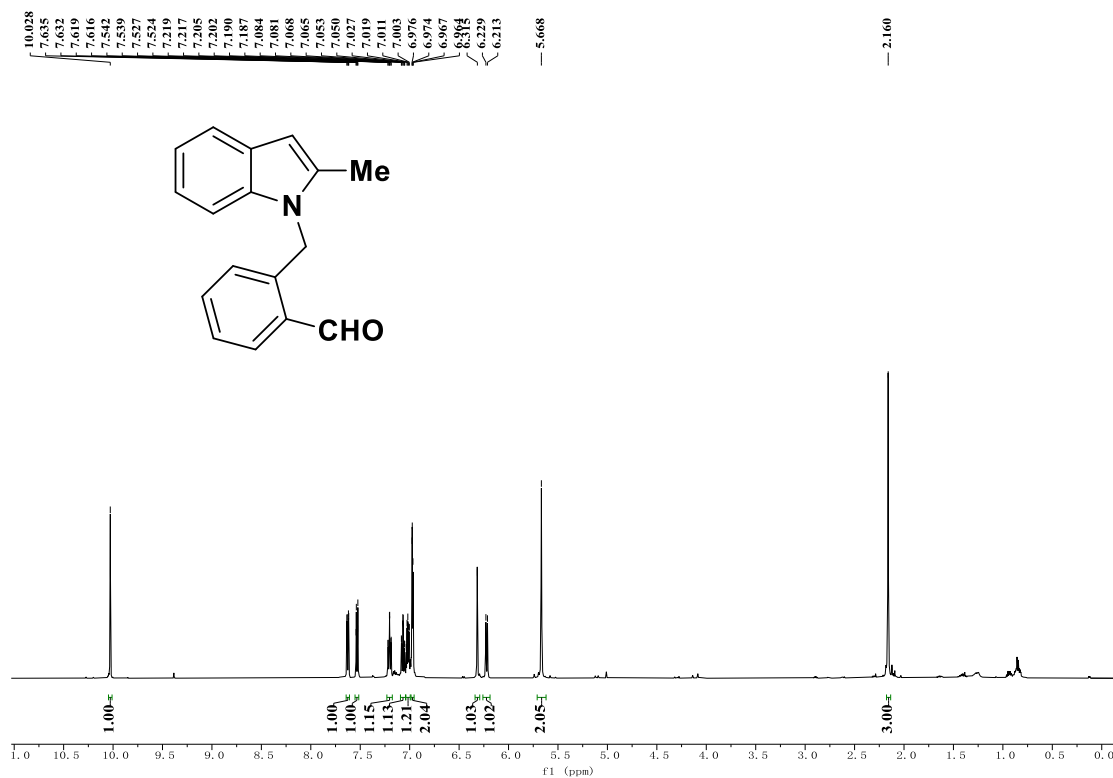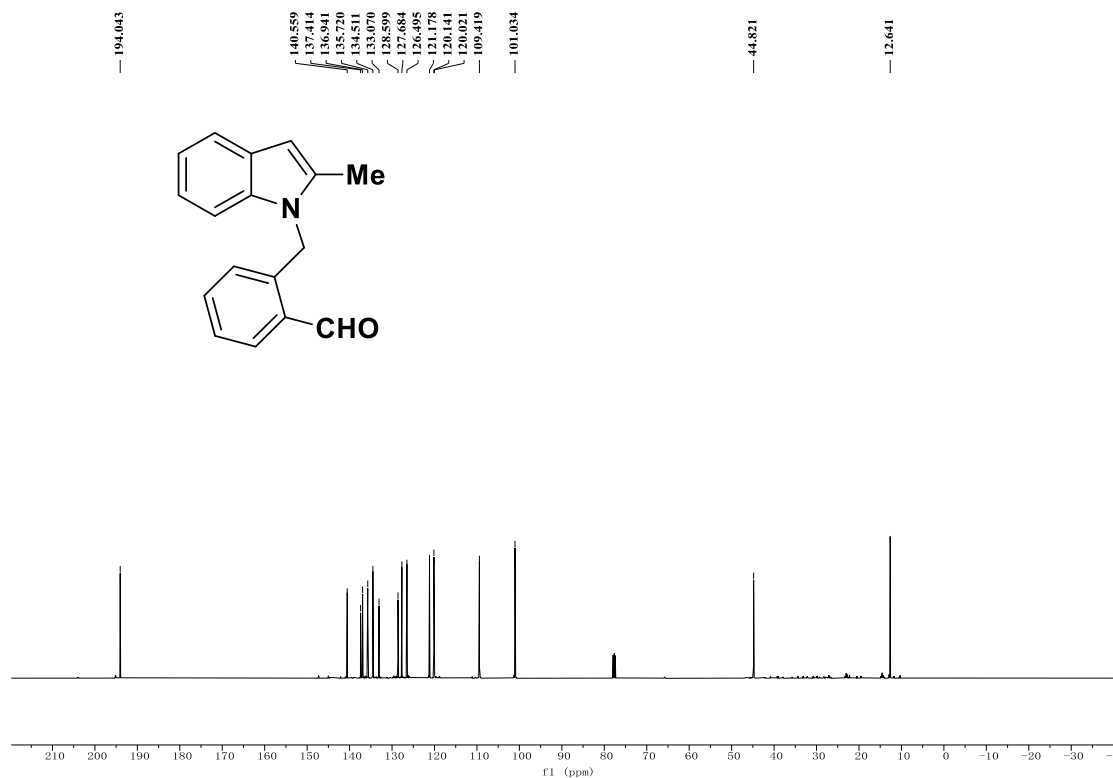



**2-((3-methyl-1H-indol-1-yl)methyl)benzaldehyde (1)**

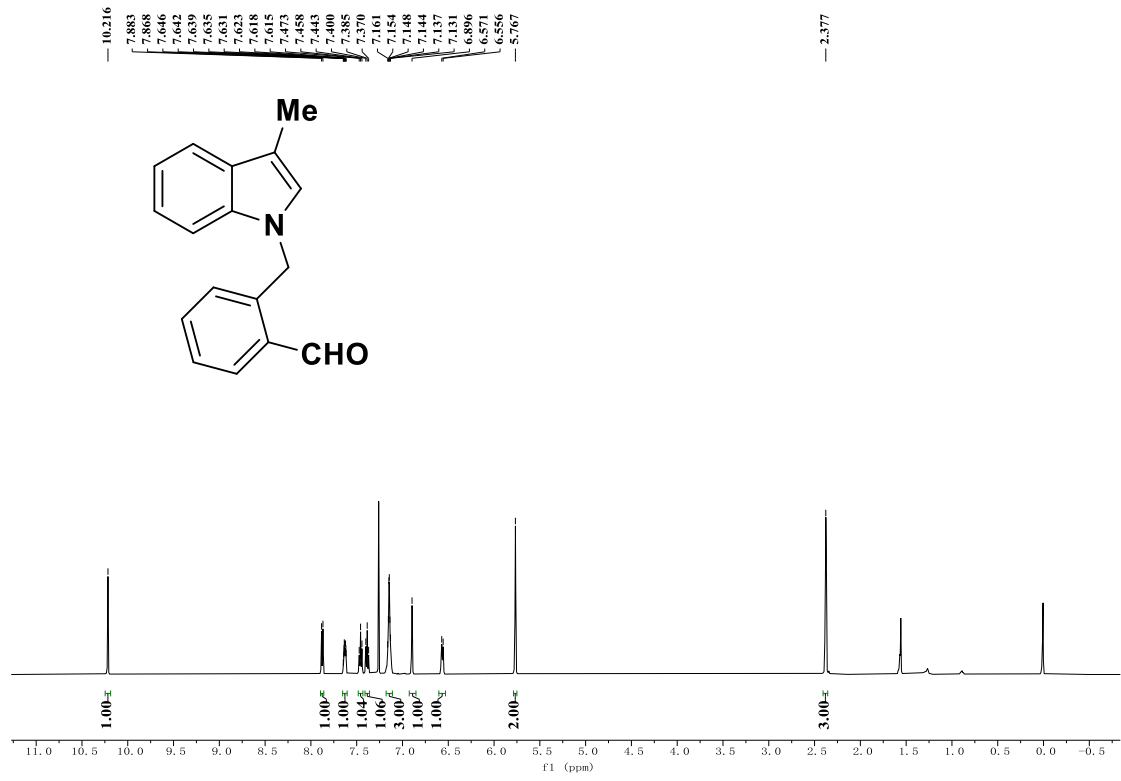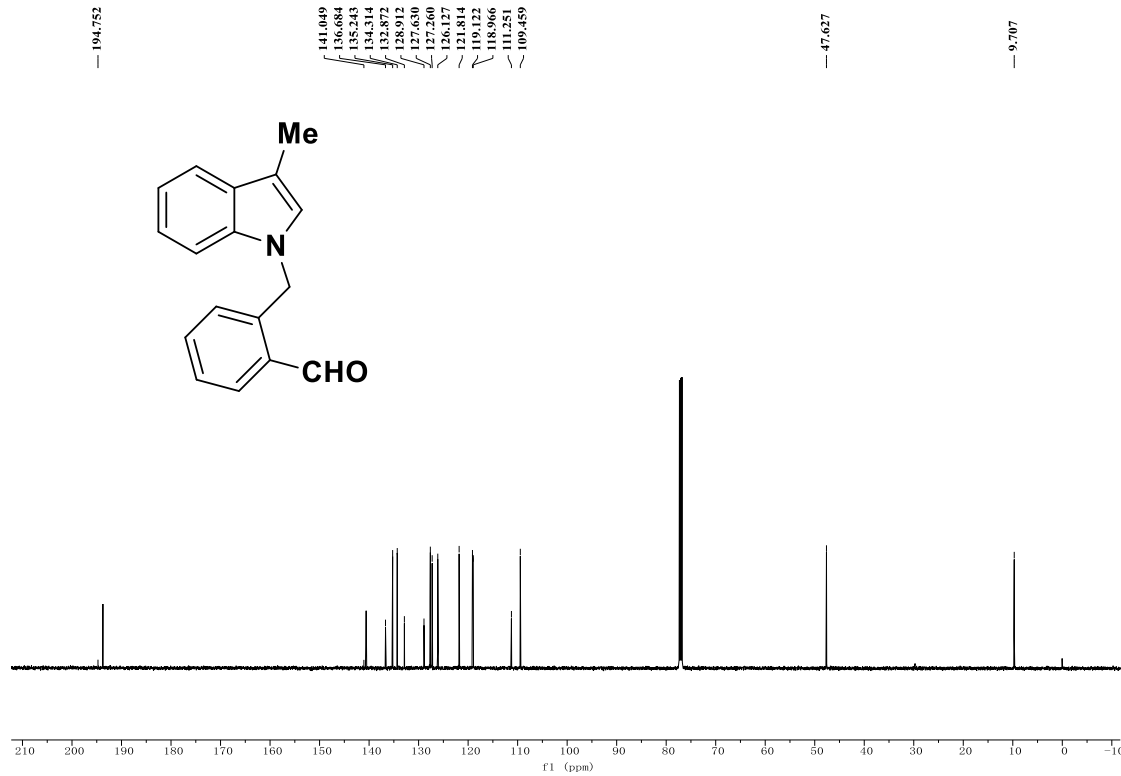

**2-((2,3-dimethyl-1H-indol-1-yl)methyl)benzaldehyde (1m)**

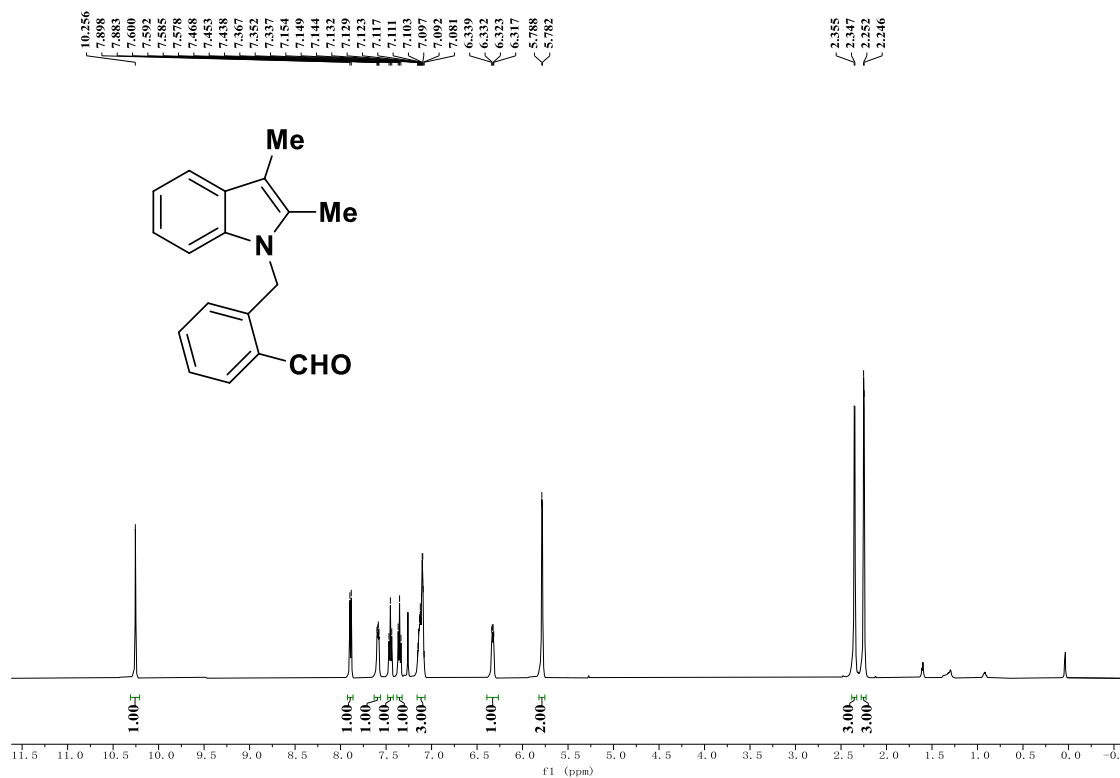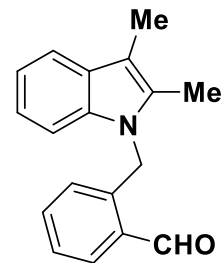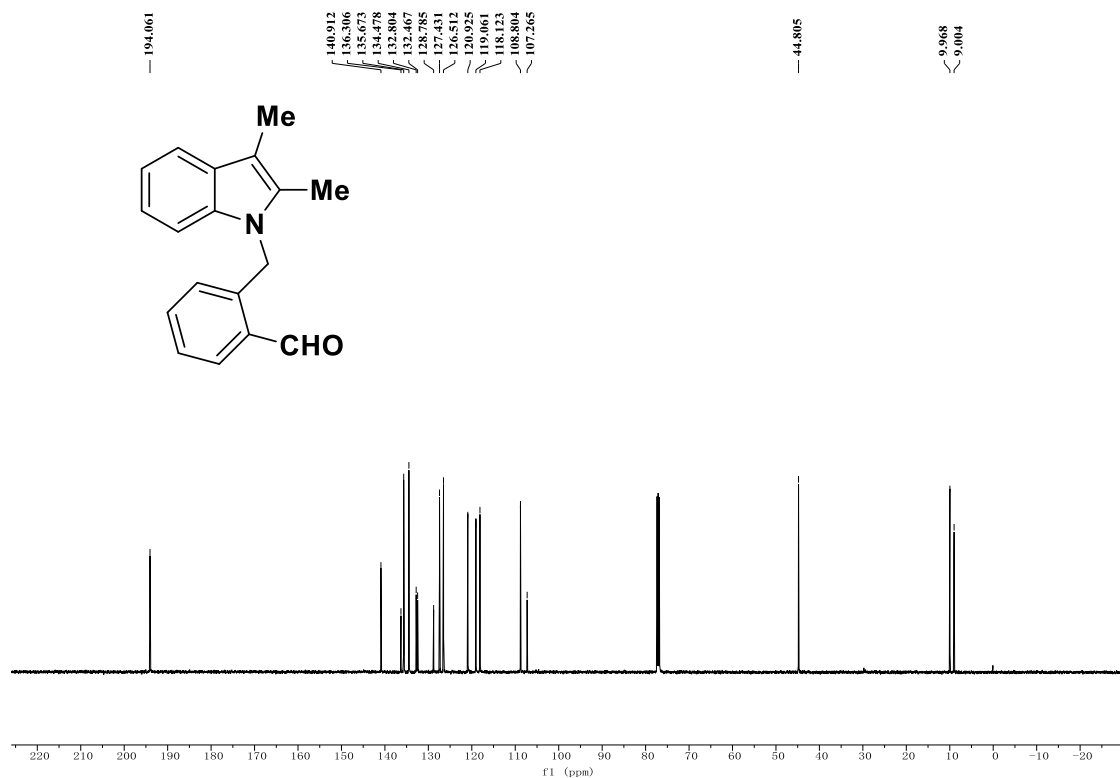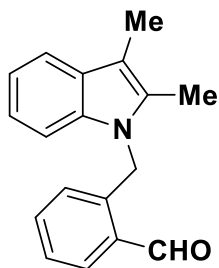

**2-(indolin-1-ylmethyl)benzaldehyde (1a')**

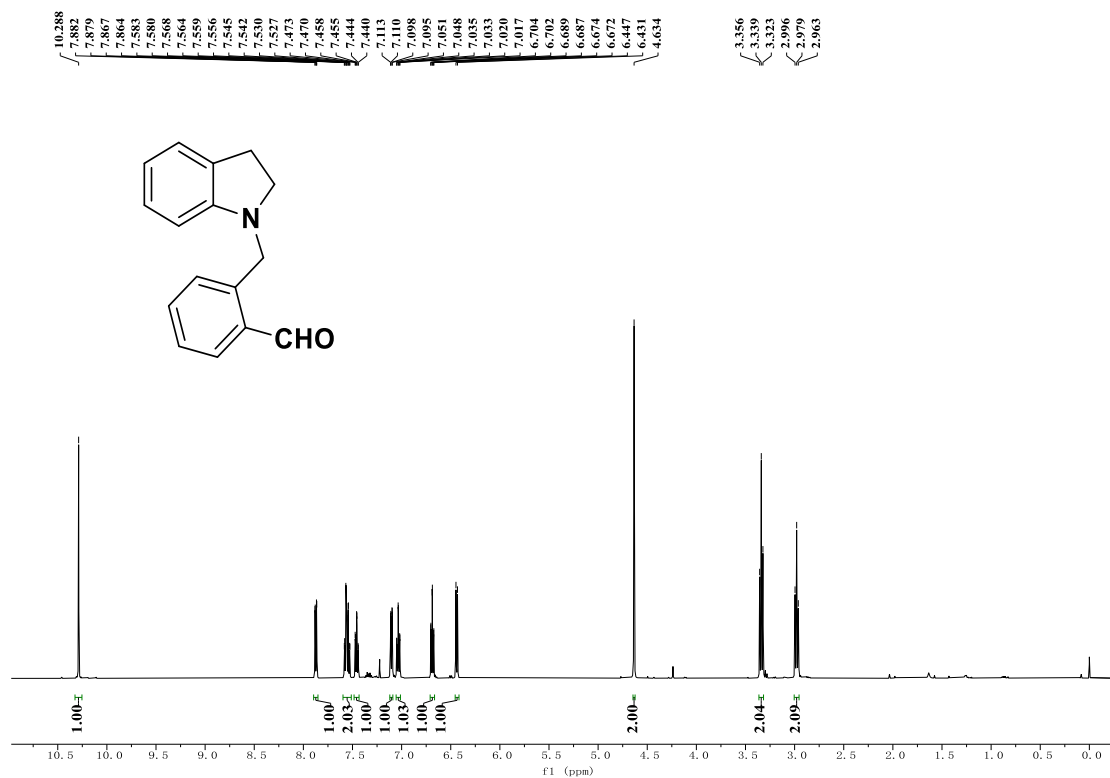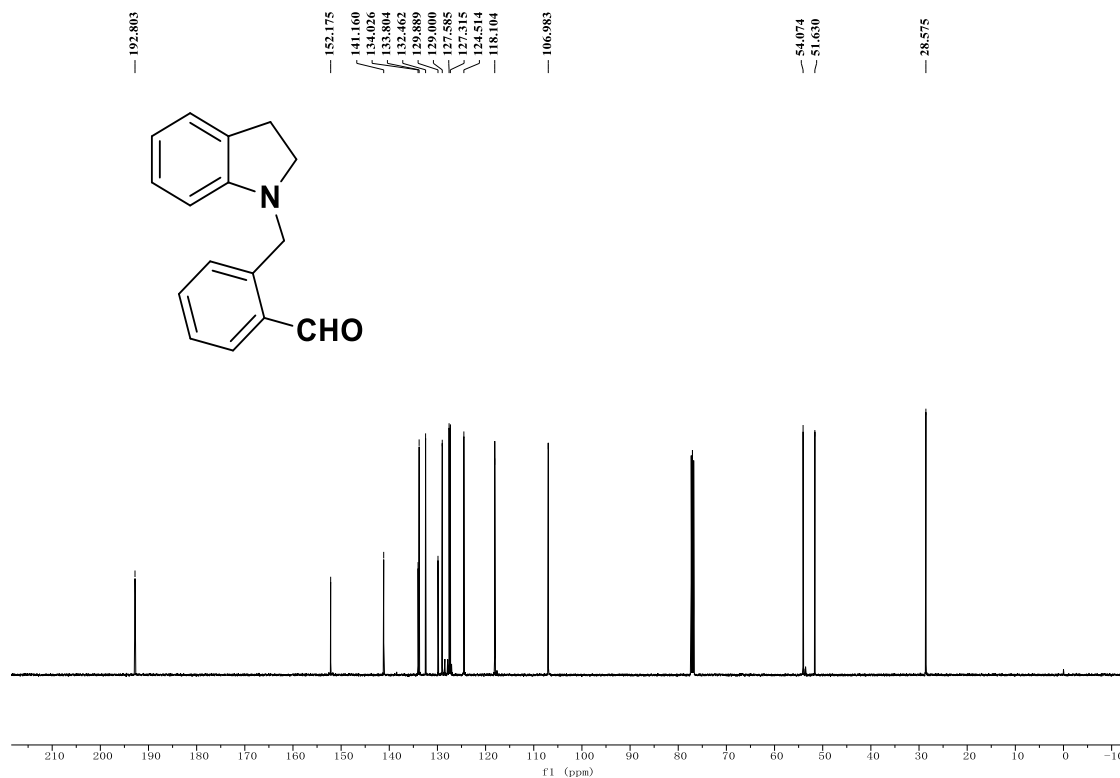

**2-((1-butyl-1H-indol-3-yl)methyl)benzaldehyde (4a)**

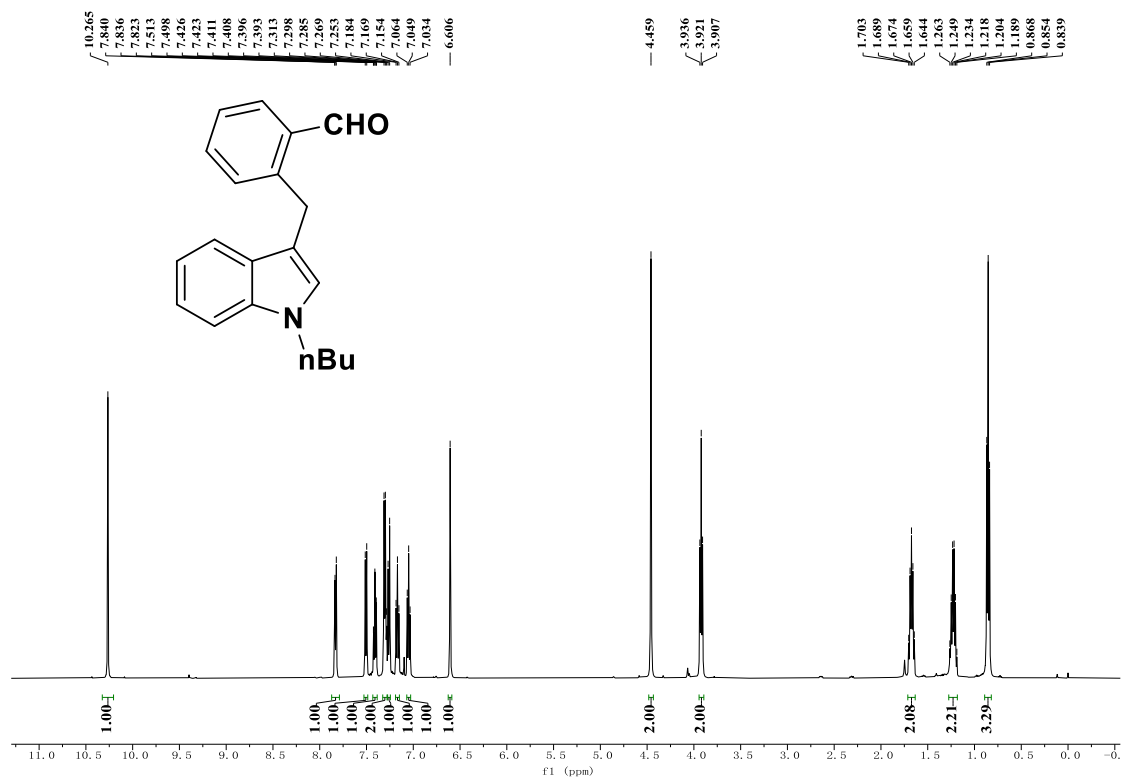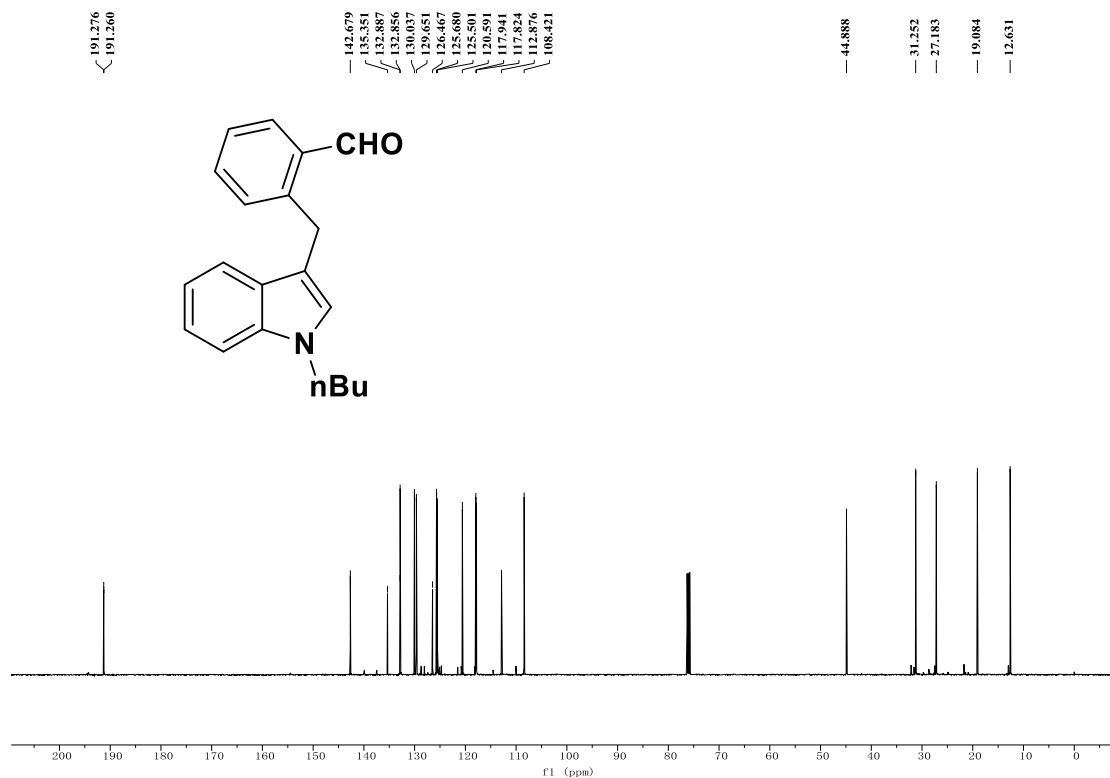

**2-((1-benzyl-1H-indol-3-yl)methyl)benzaldehyde (4b)**

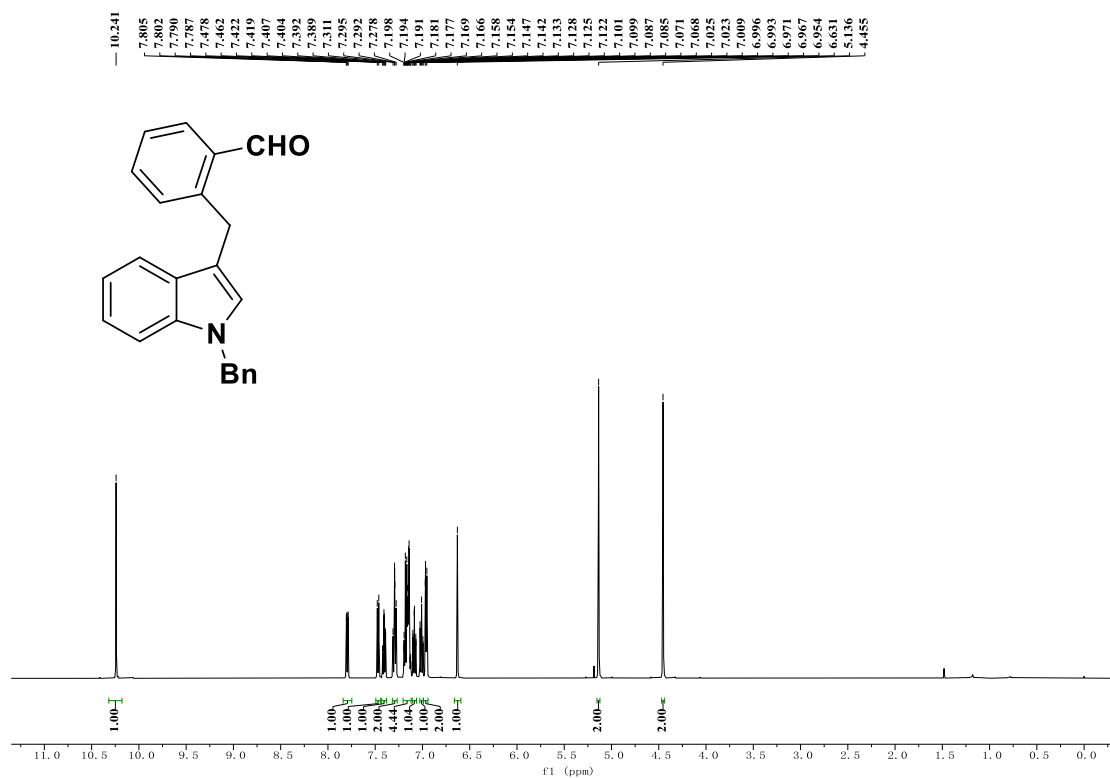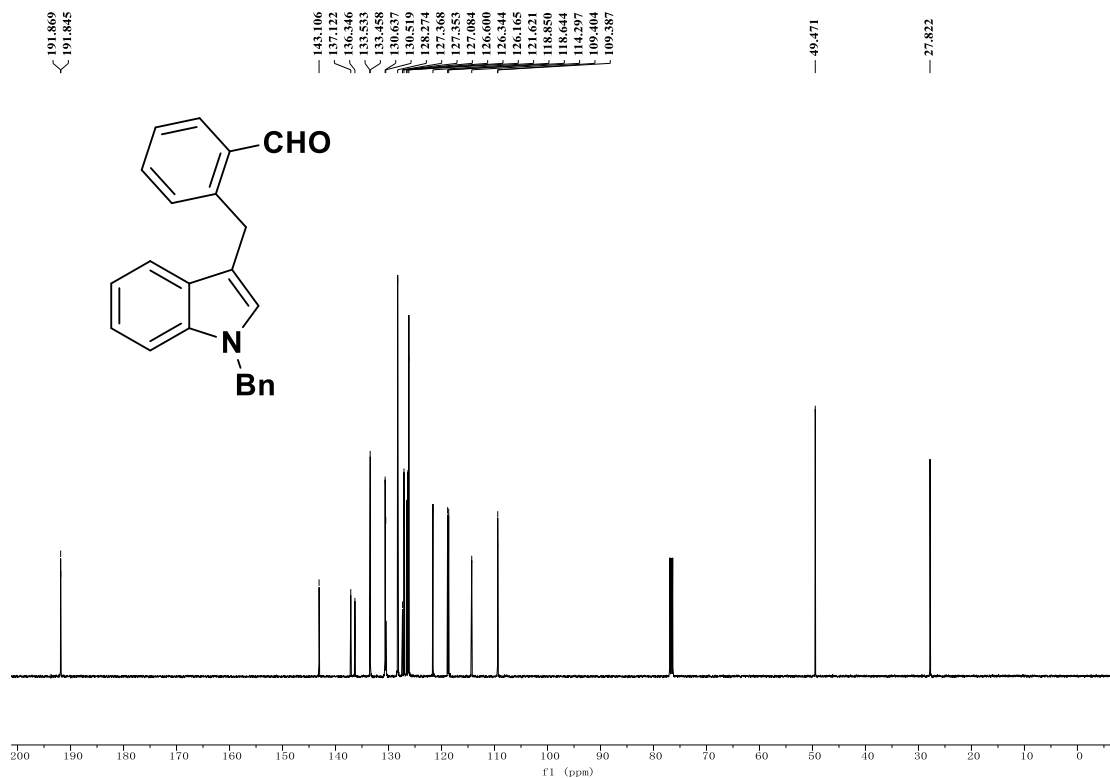

**2-((1-methyl-1H-indol-3-yl)methyl)benzaldehyde (4c)**

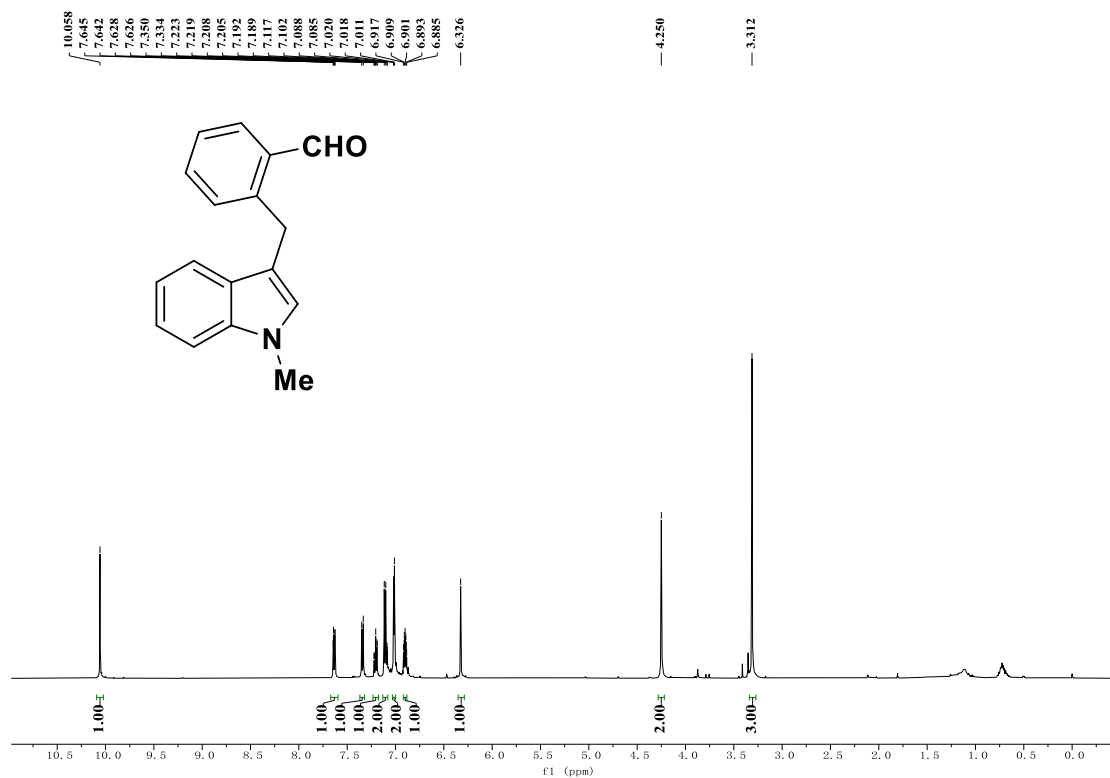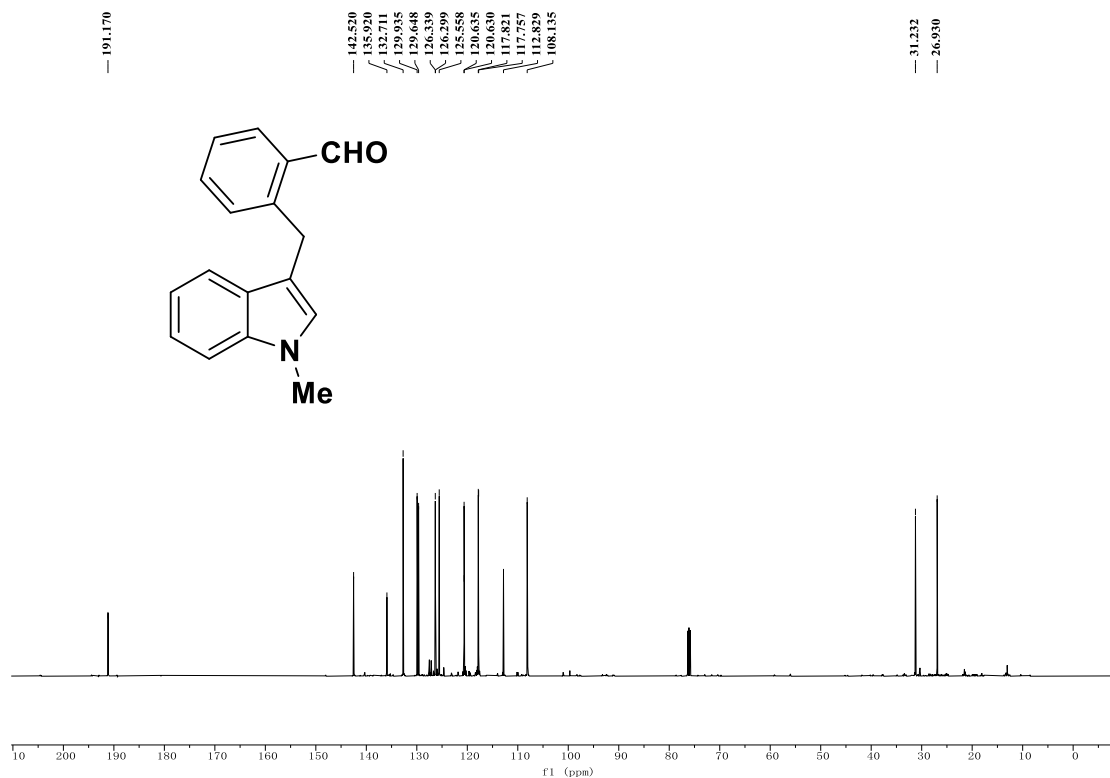

**2-((1-allyl-1H-indol-3-yl)methyl)benzaldehyde (4d)**

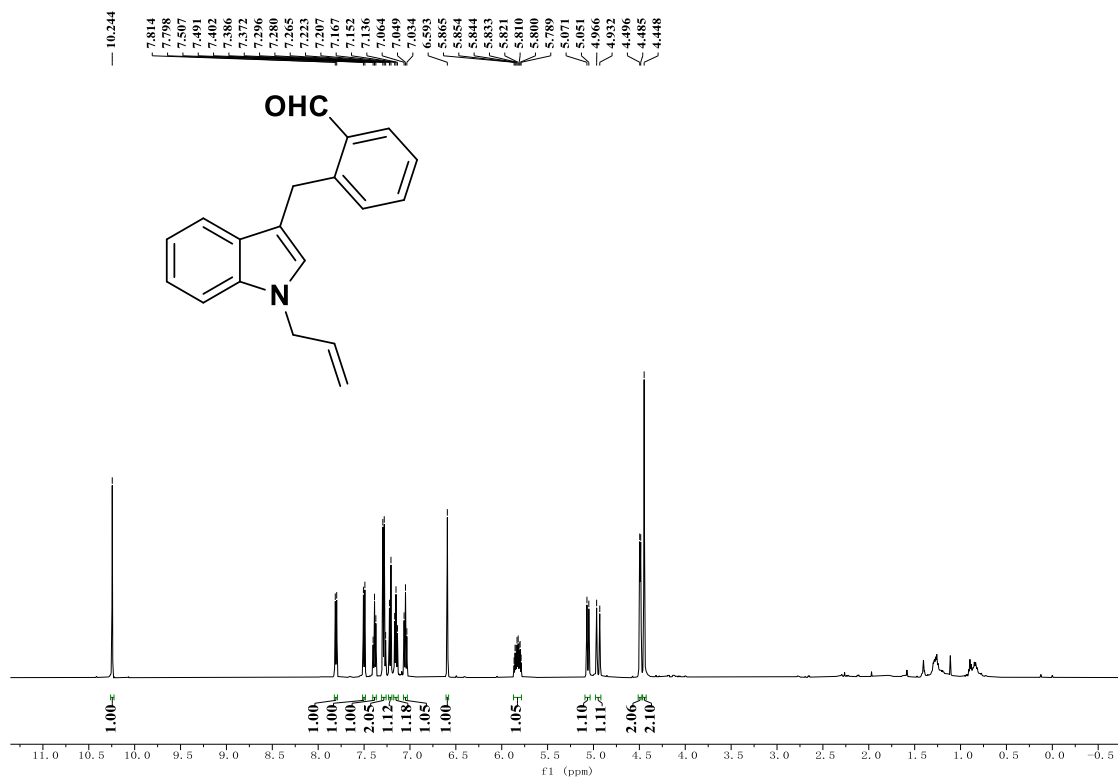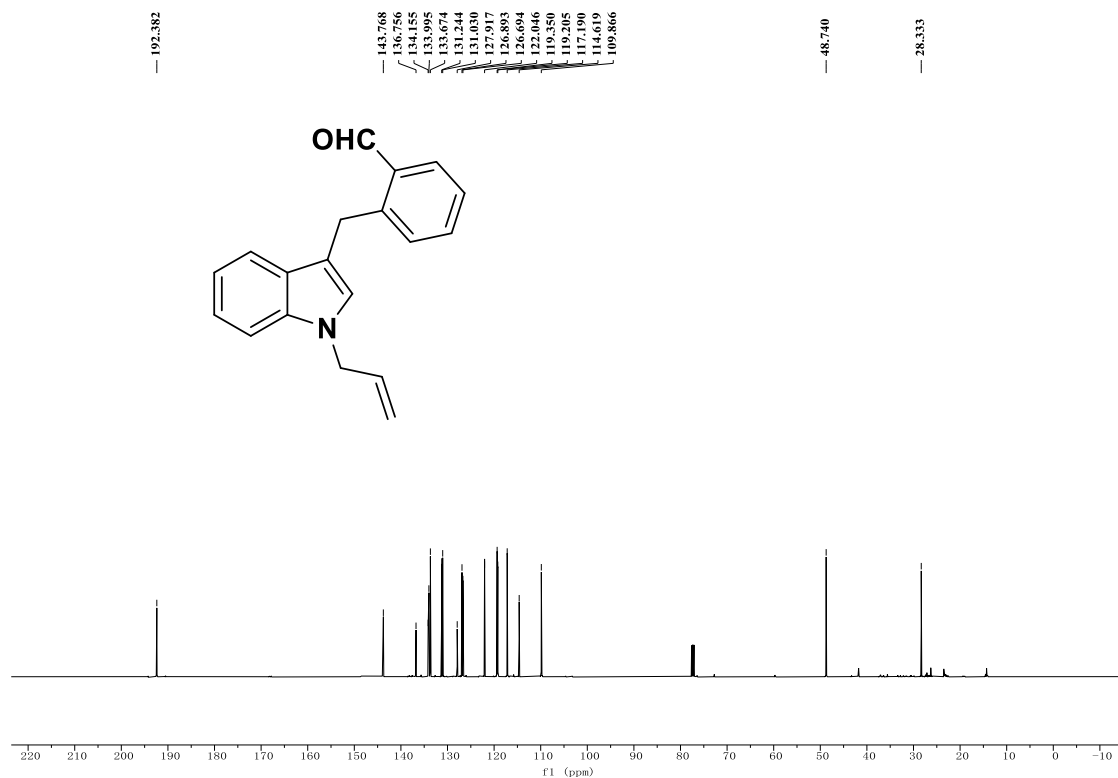

**2-((1-(cyclopropylmethyl)-1H-indol-3-yl)methyl)benzaldehyde (4e)**

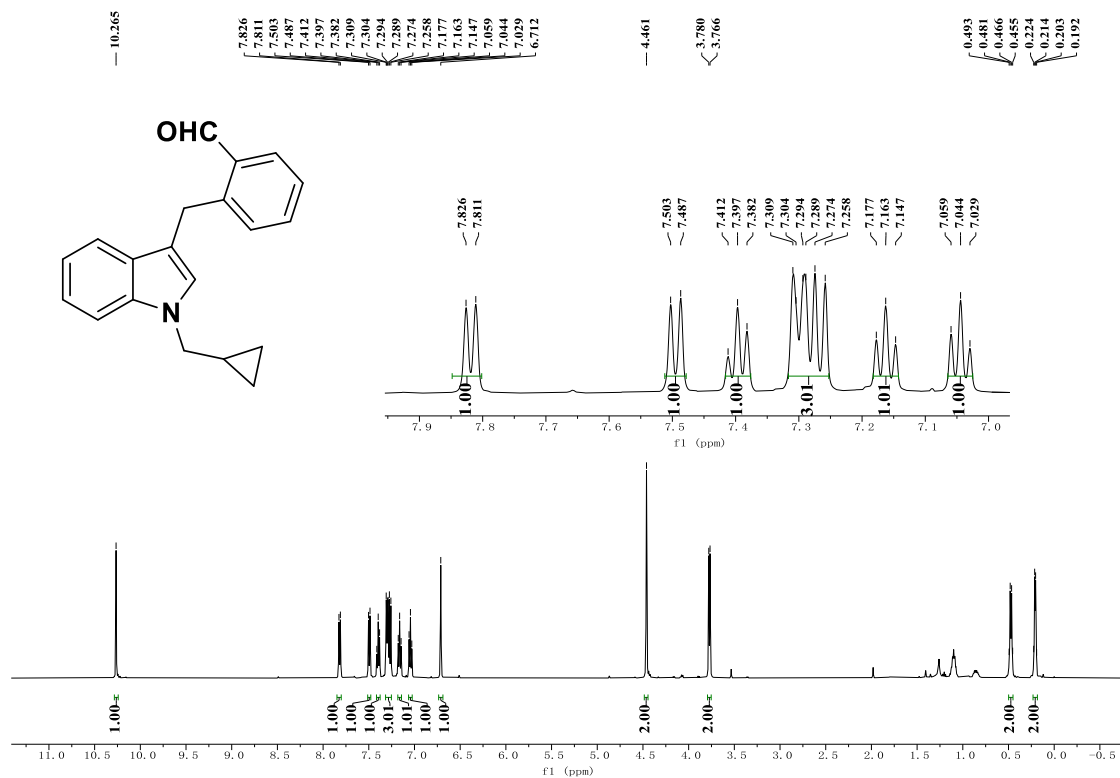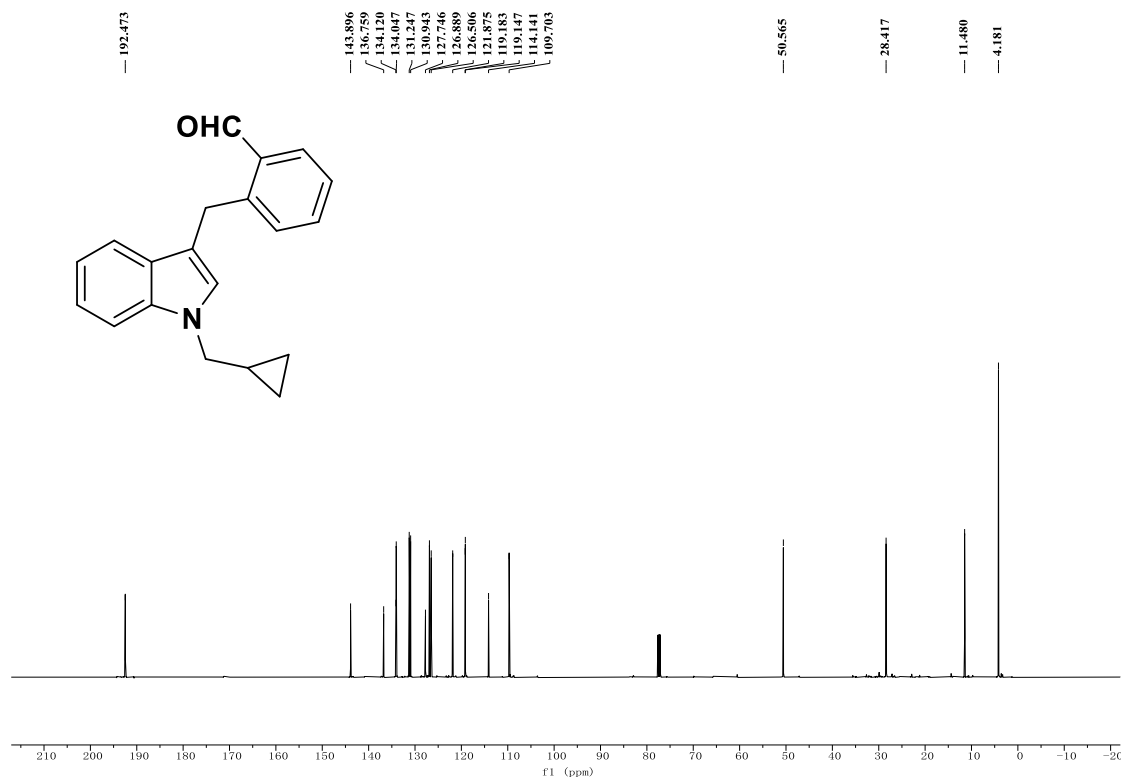



**2-((1-benzyl-2-methyl-1H-indol-3-yl)methyl)benzaldehyde (4f)**

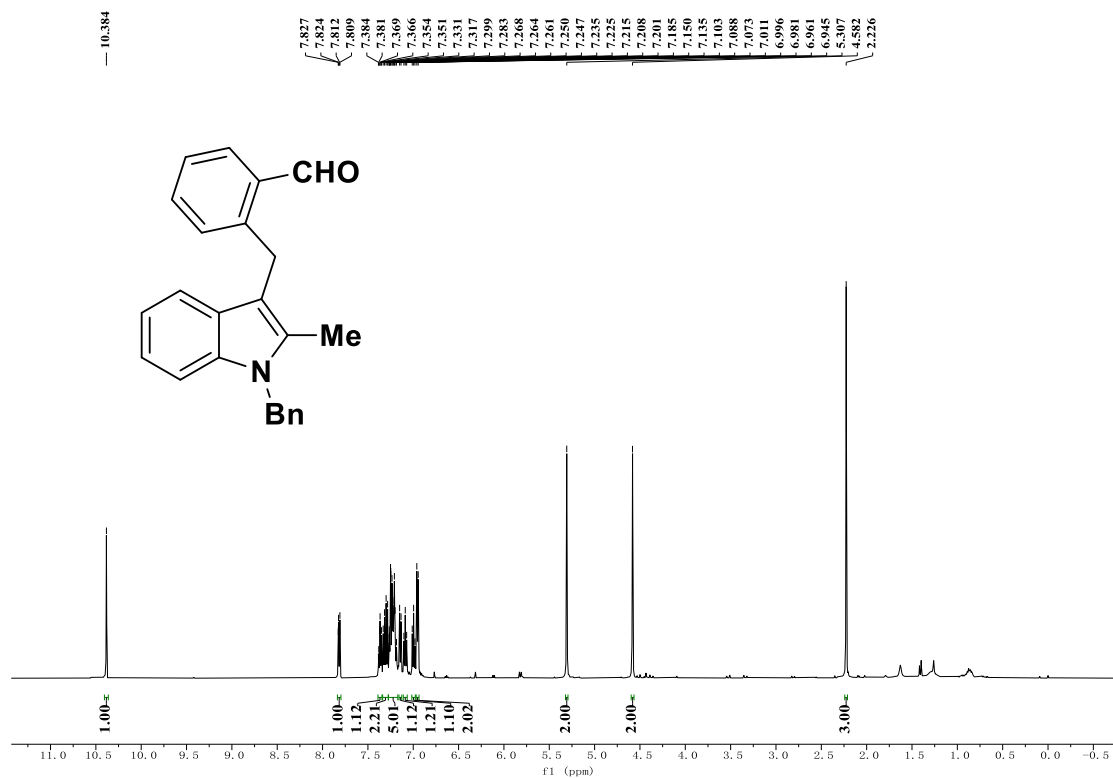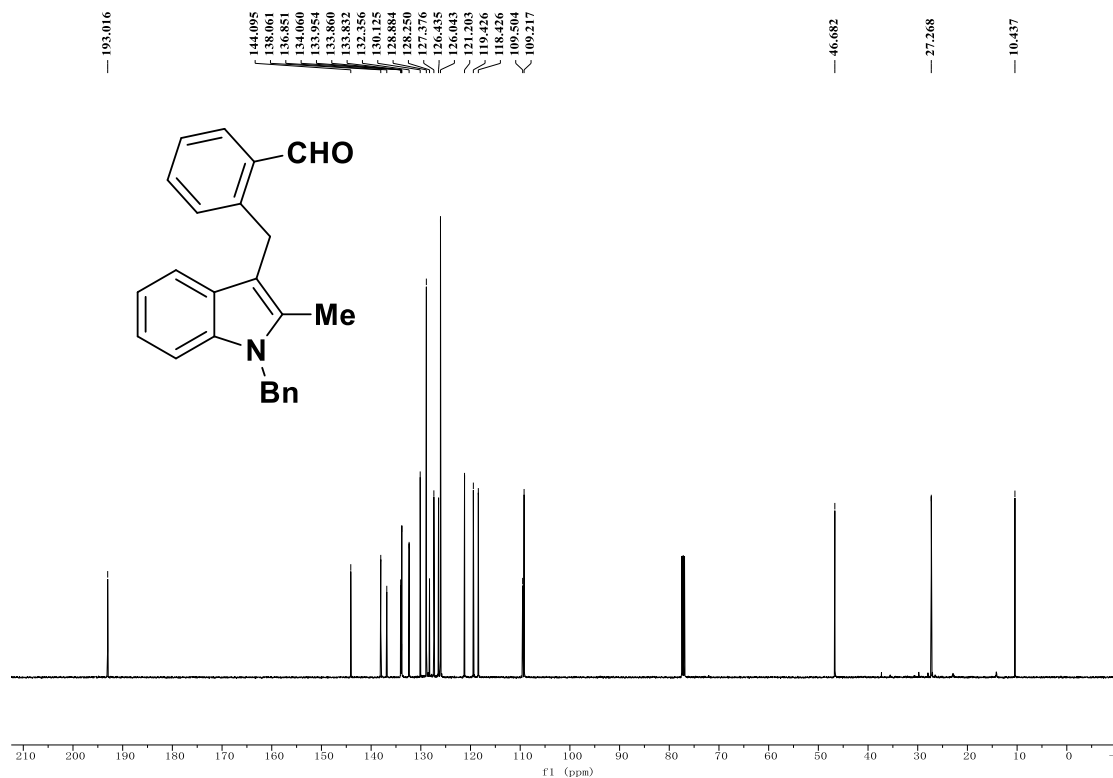

**2-((1-benzyl-4-methyl-1H-indol-3-yl)methyl)benzaldehyde (4g)**

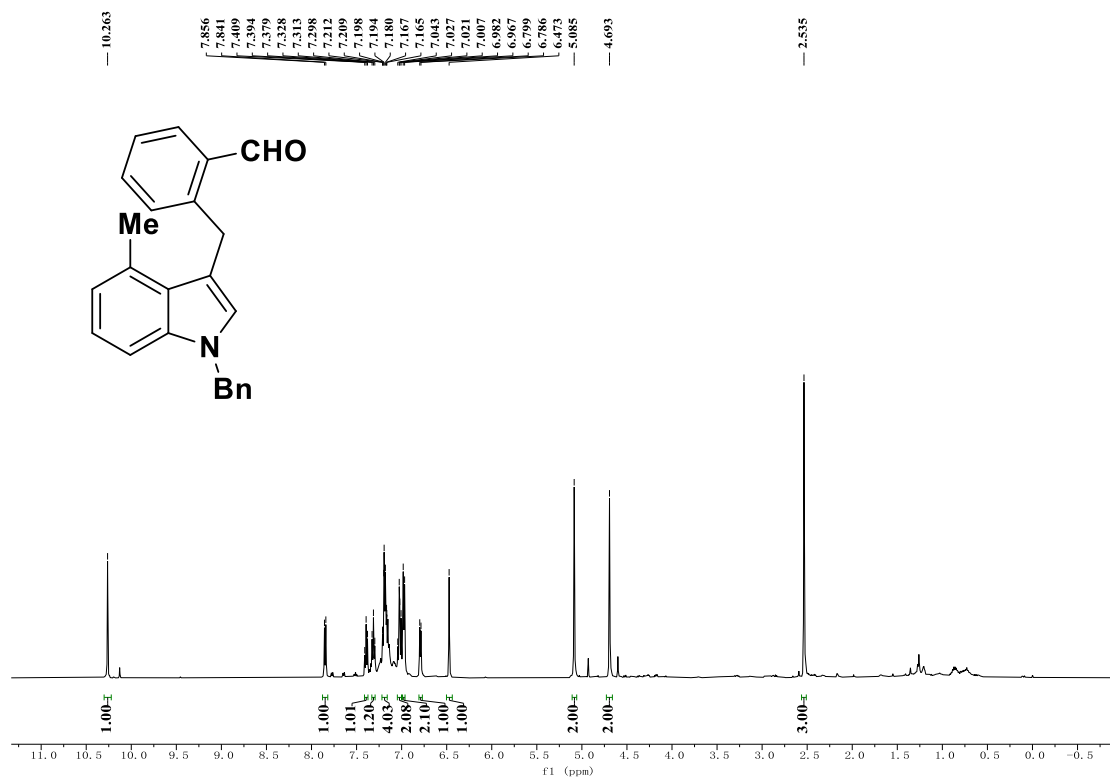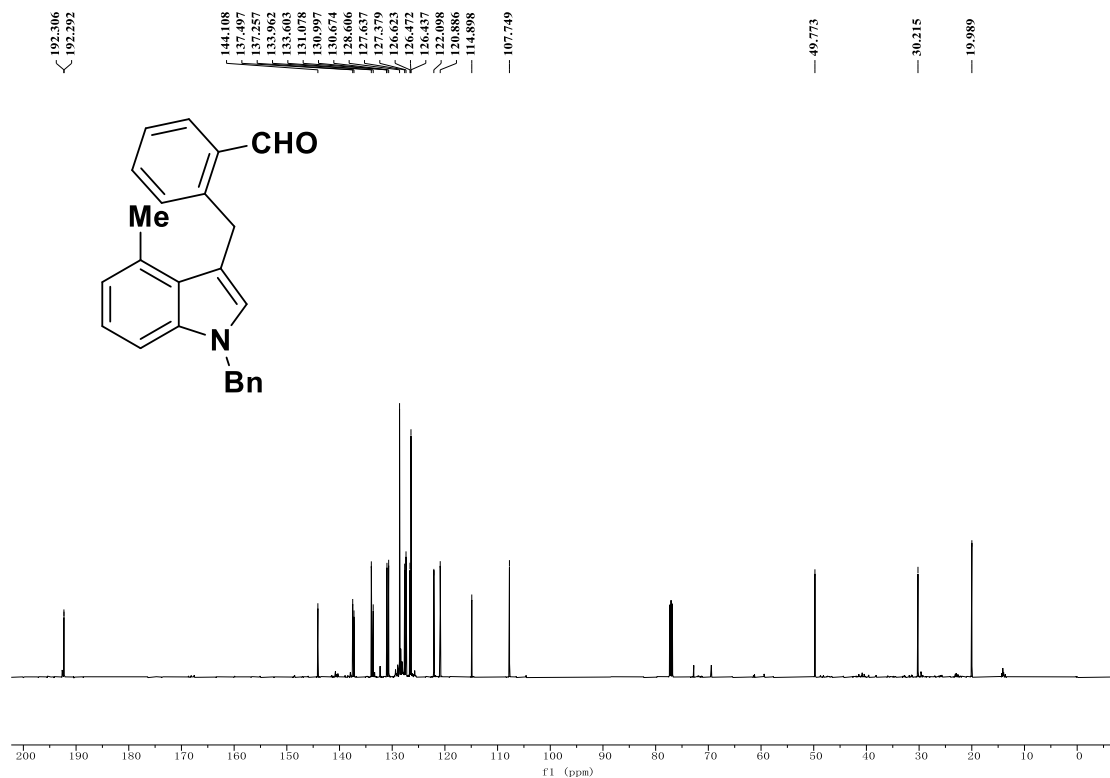

**2-((1-benzyl-4-fluoro-1H-indol-3-yl)methyl)benzaldehyde (4h)**

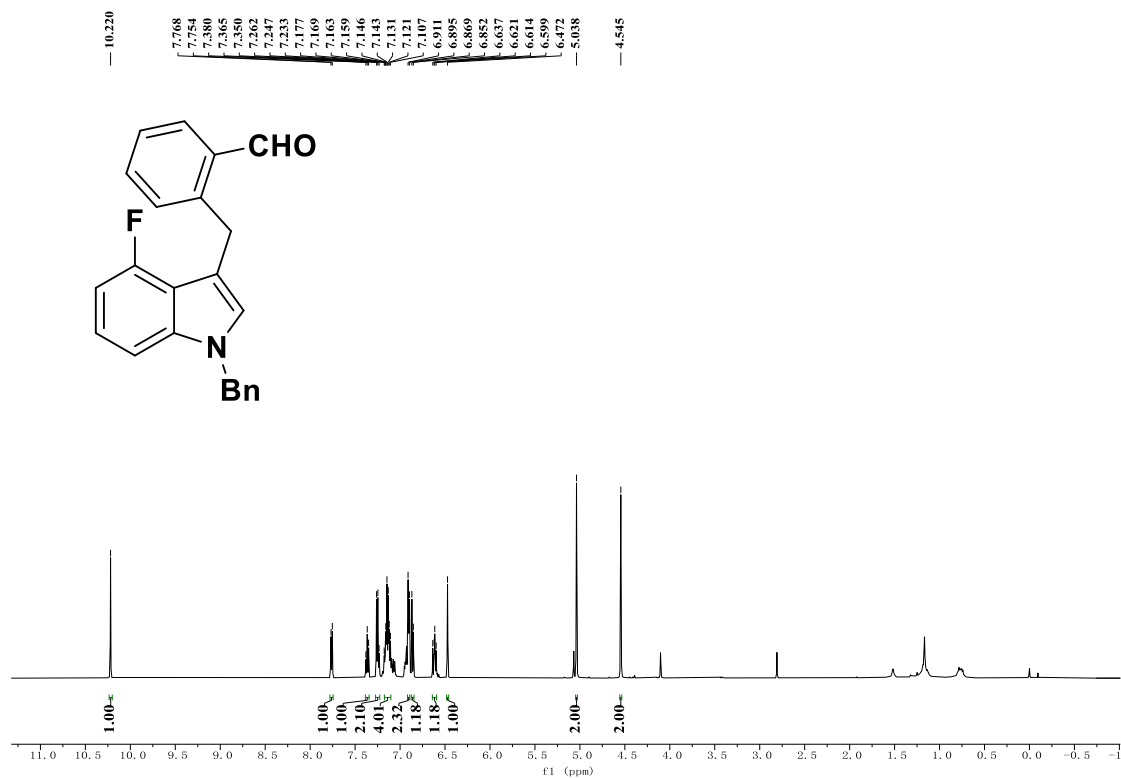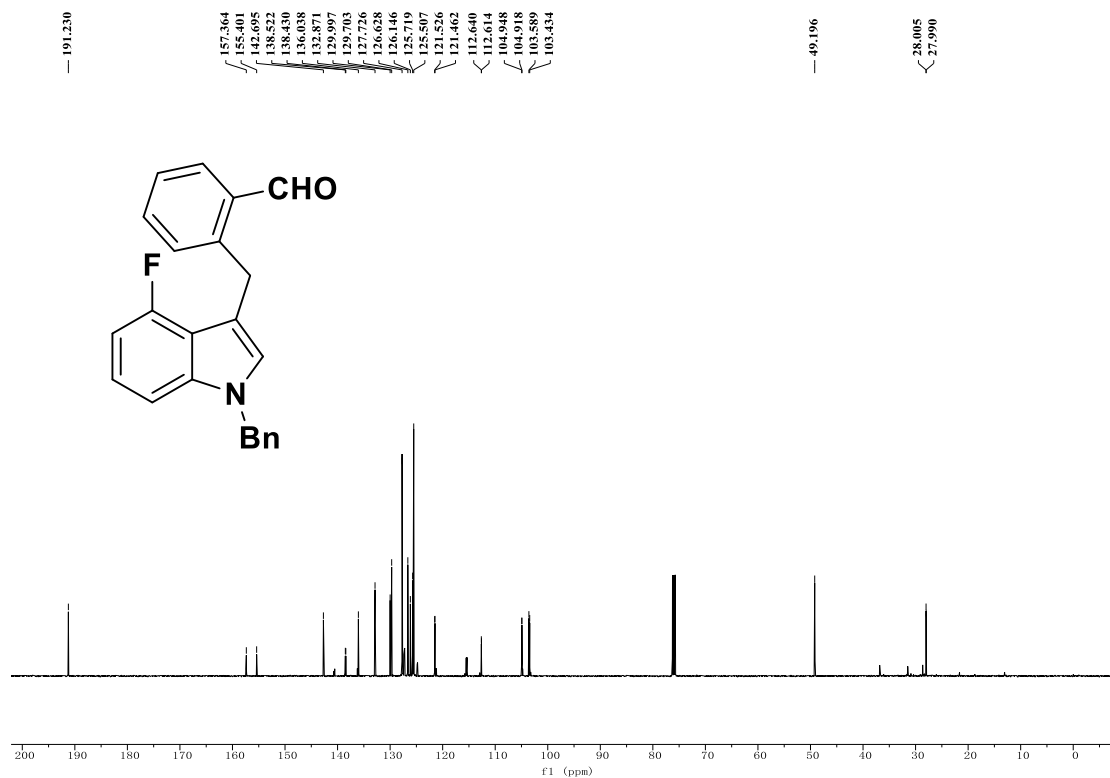

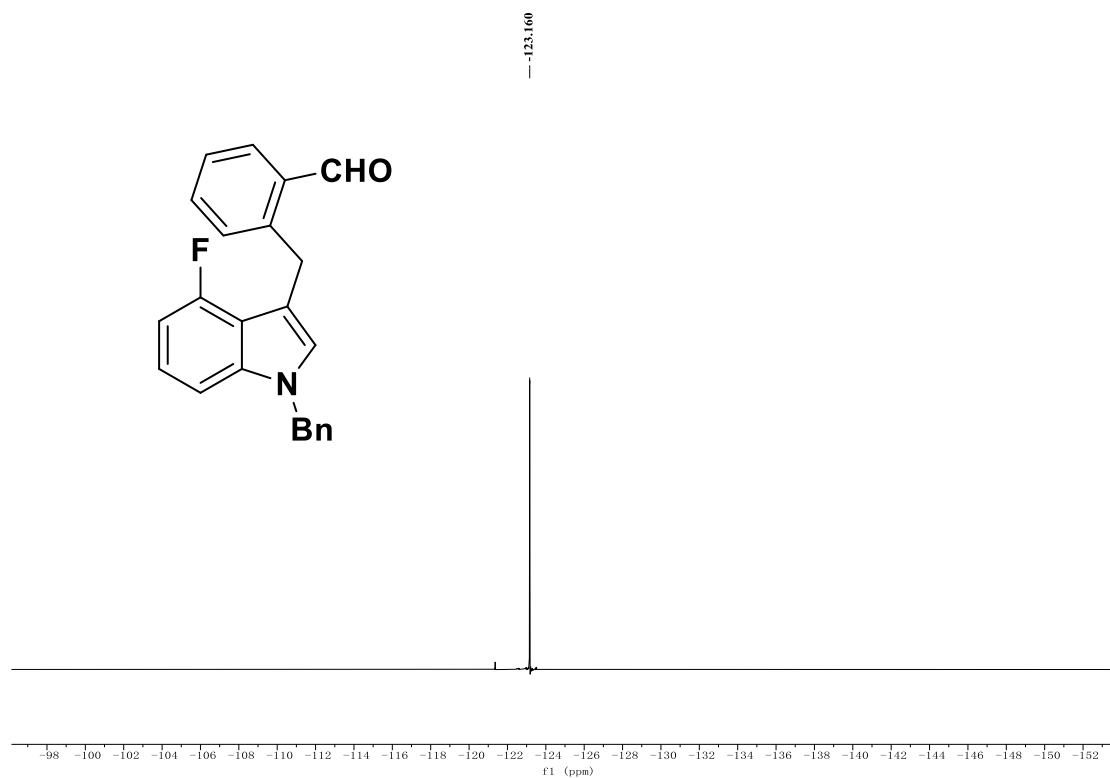

**2-((1-benzyl-4-chloro-1H-indol-3-yl)methyl)benzaldehyde (4i)**

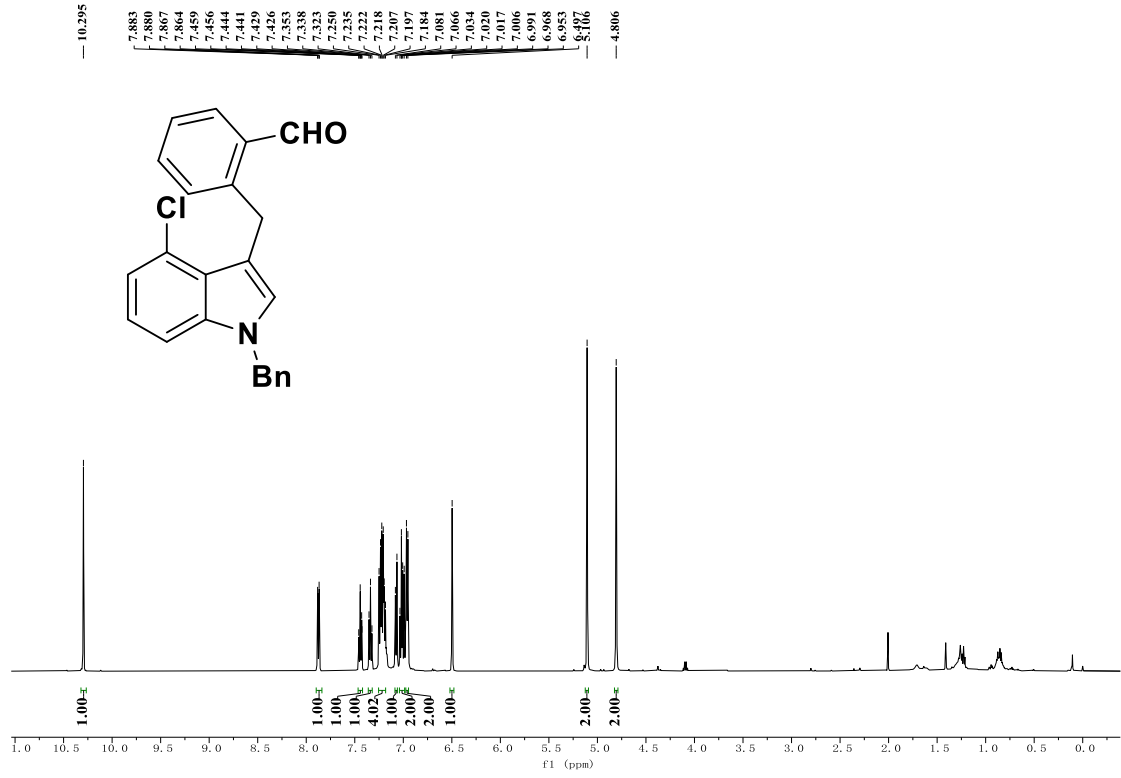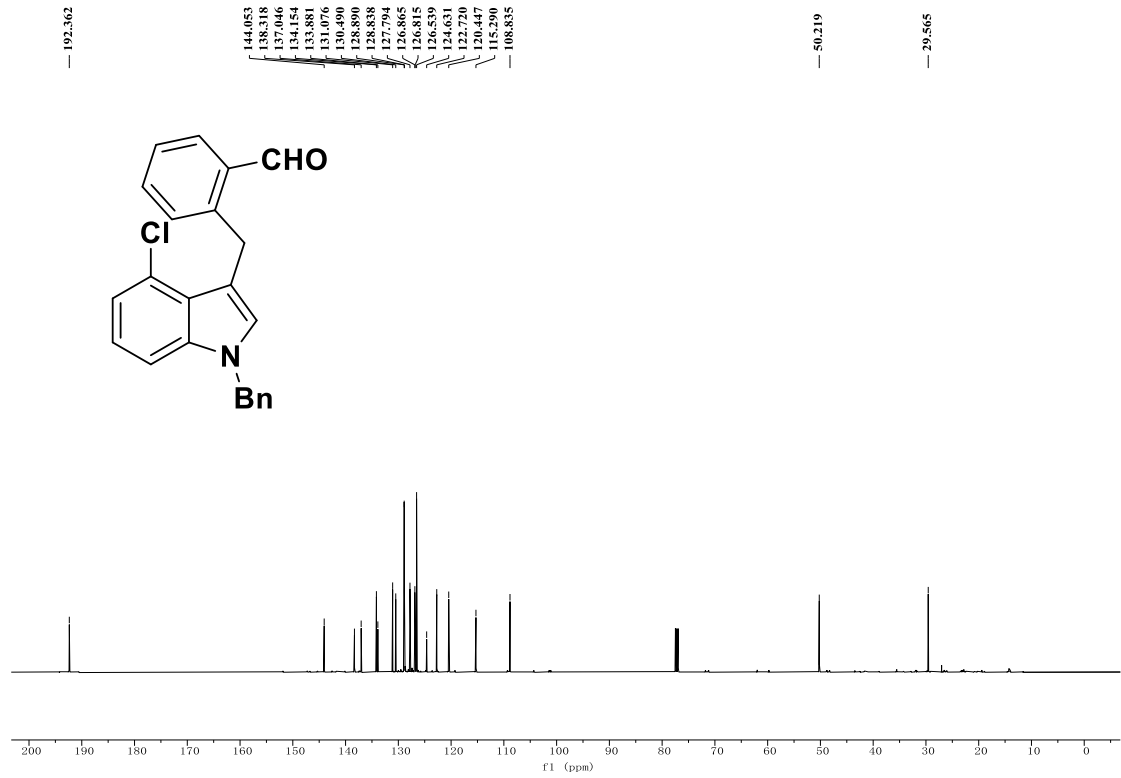

**2-((1-benzyl-5-methoxy-1H-indol-3-yl)methyl)benzaldehyde (4j)**

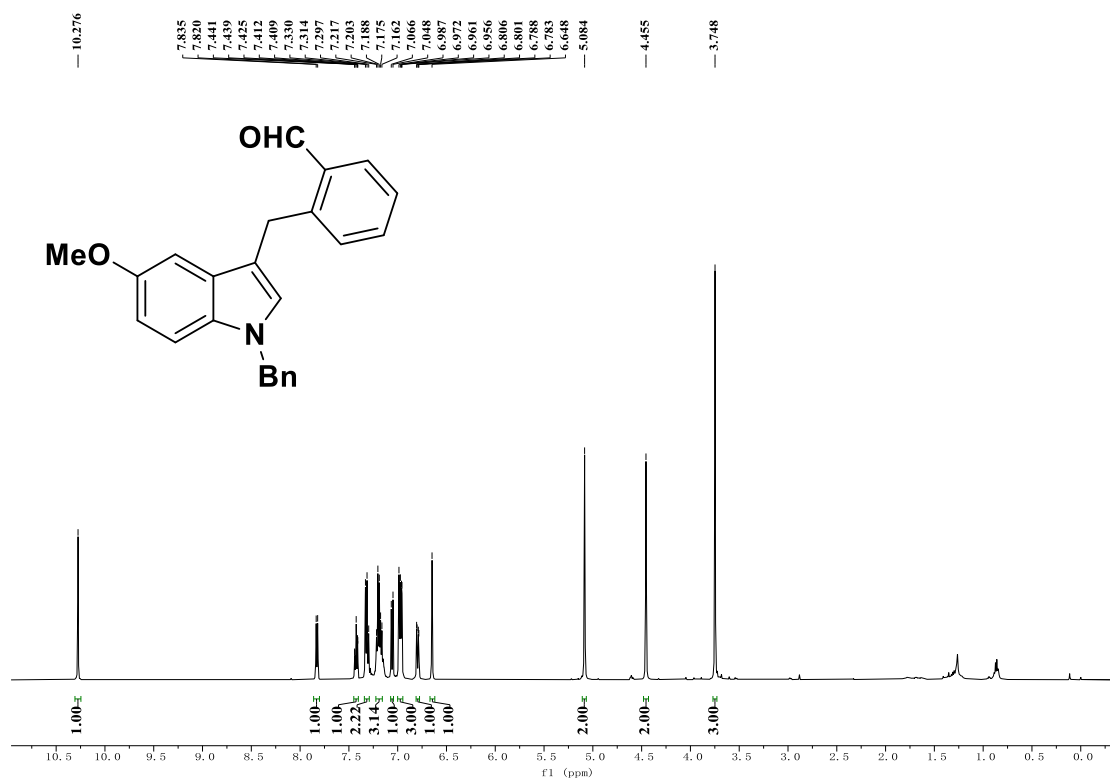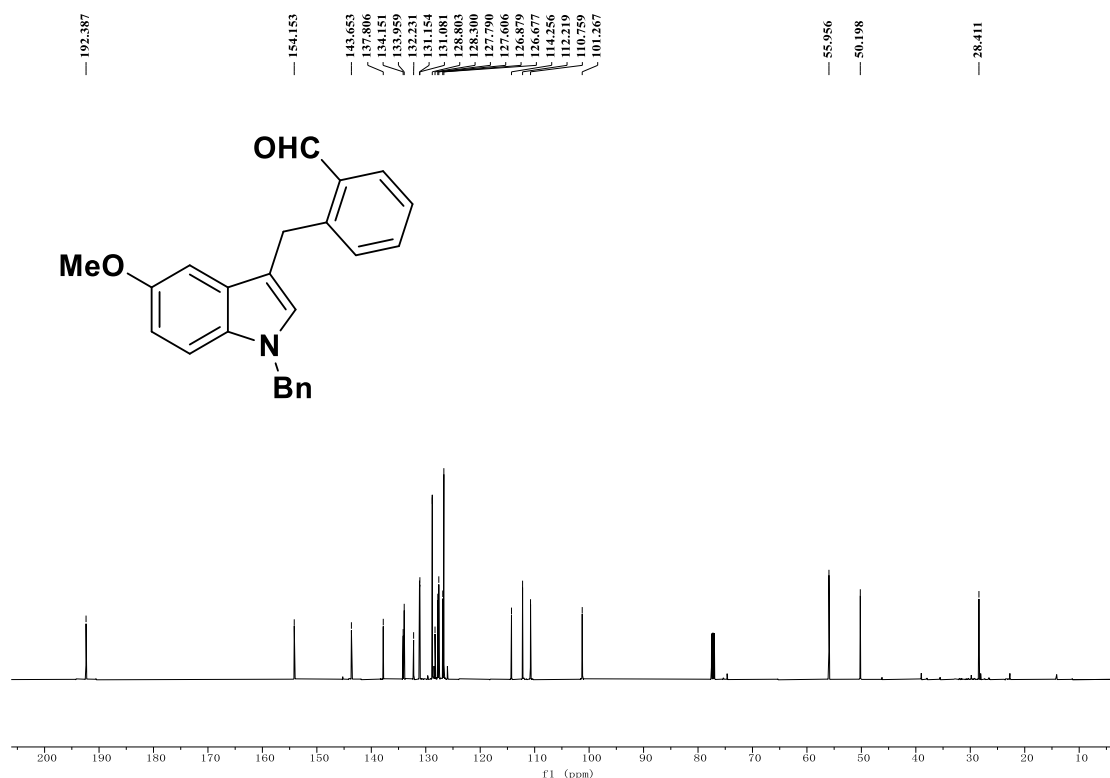

2-((1-benzyl-5-fluoro-1H-indol-3-yl)methyl)benzaldehyde (4k)

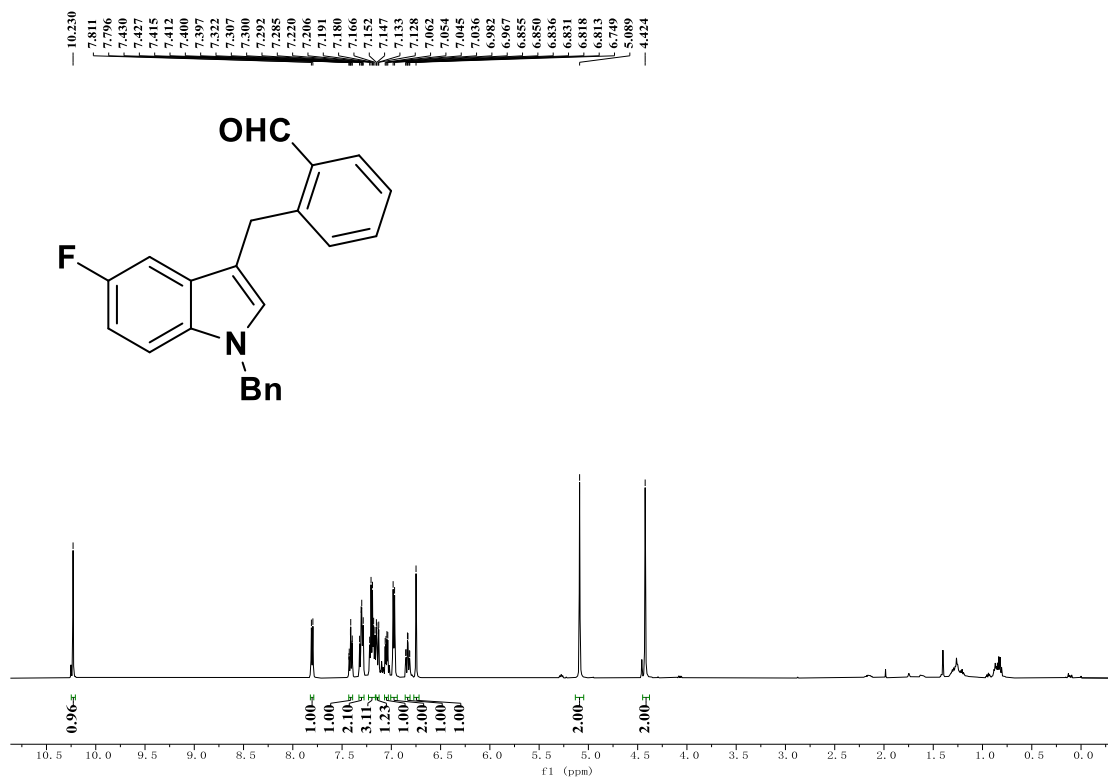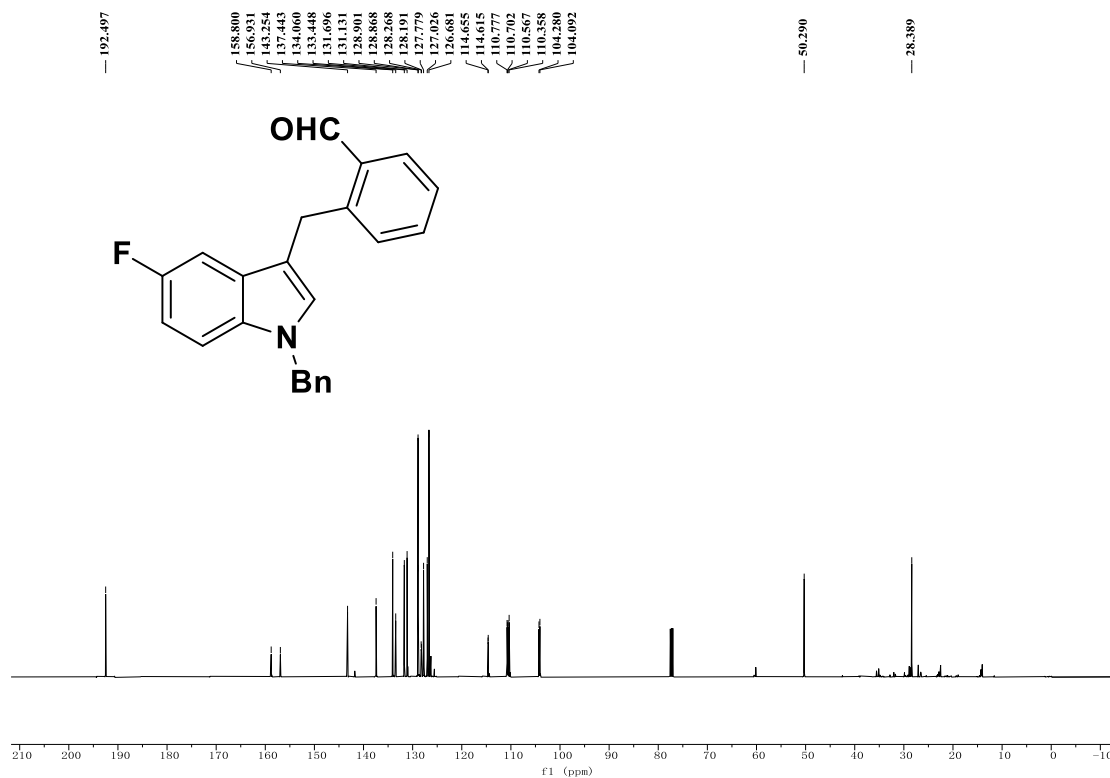

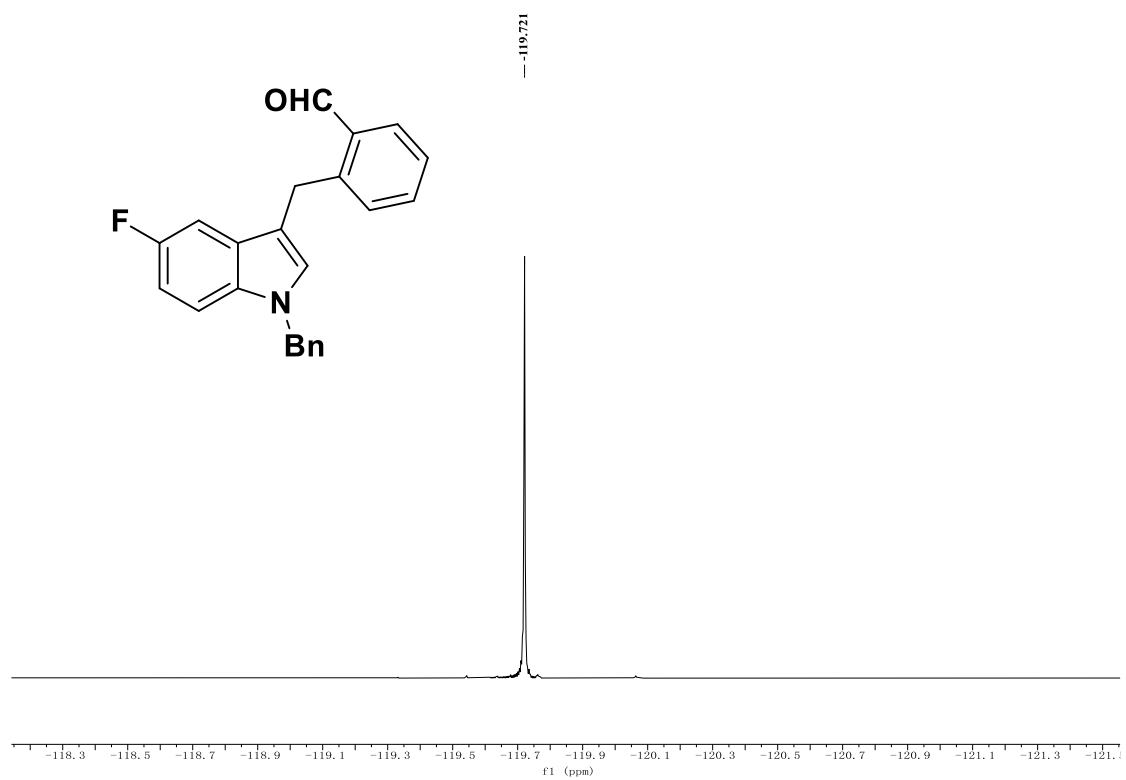



**2-((1-benzyl-5-chloro-1H-indol-3-yl)methyl)benzaldehyde (4l)**

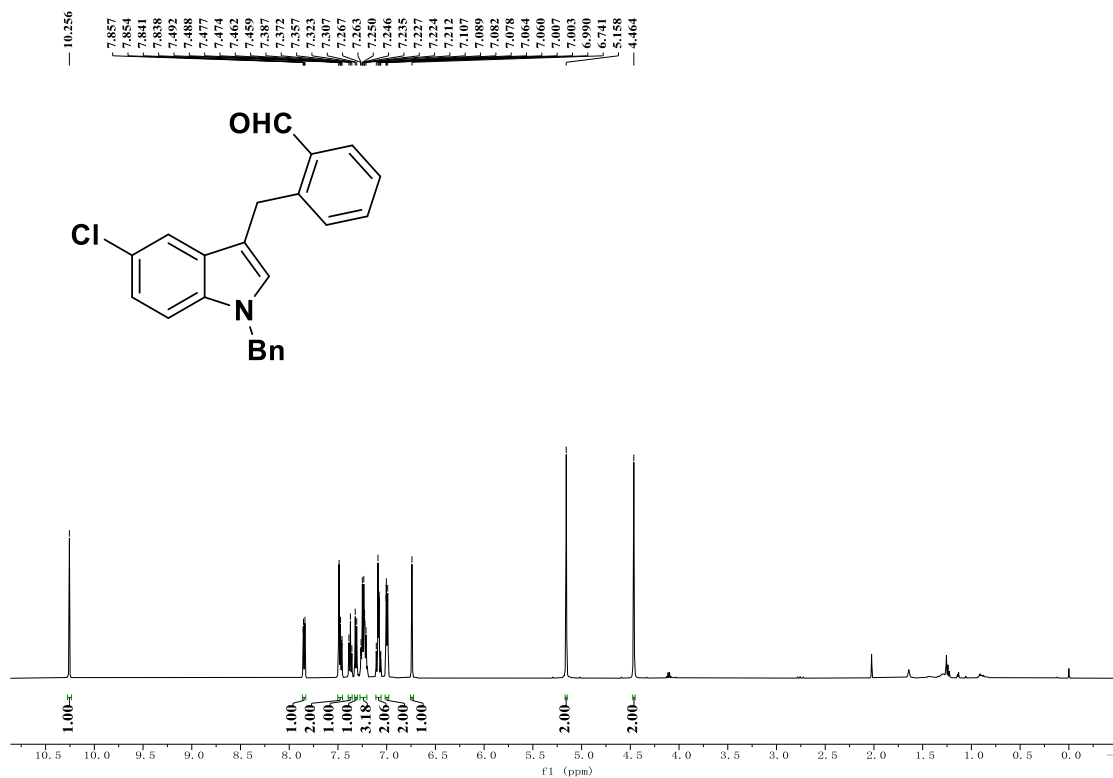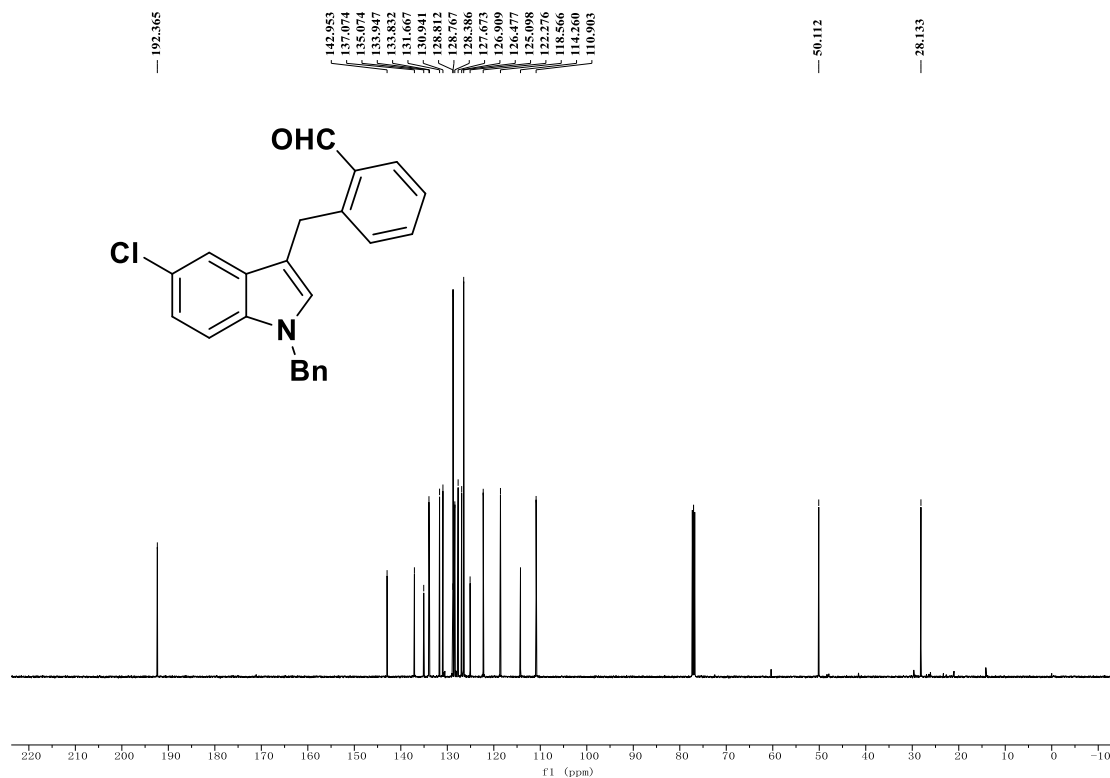

**2-((1-benzyl-6-methoxy-1H-indol-3-yl)methyl)benzaldehyde (4m)**

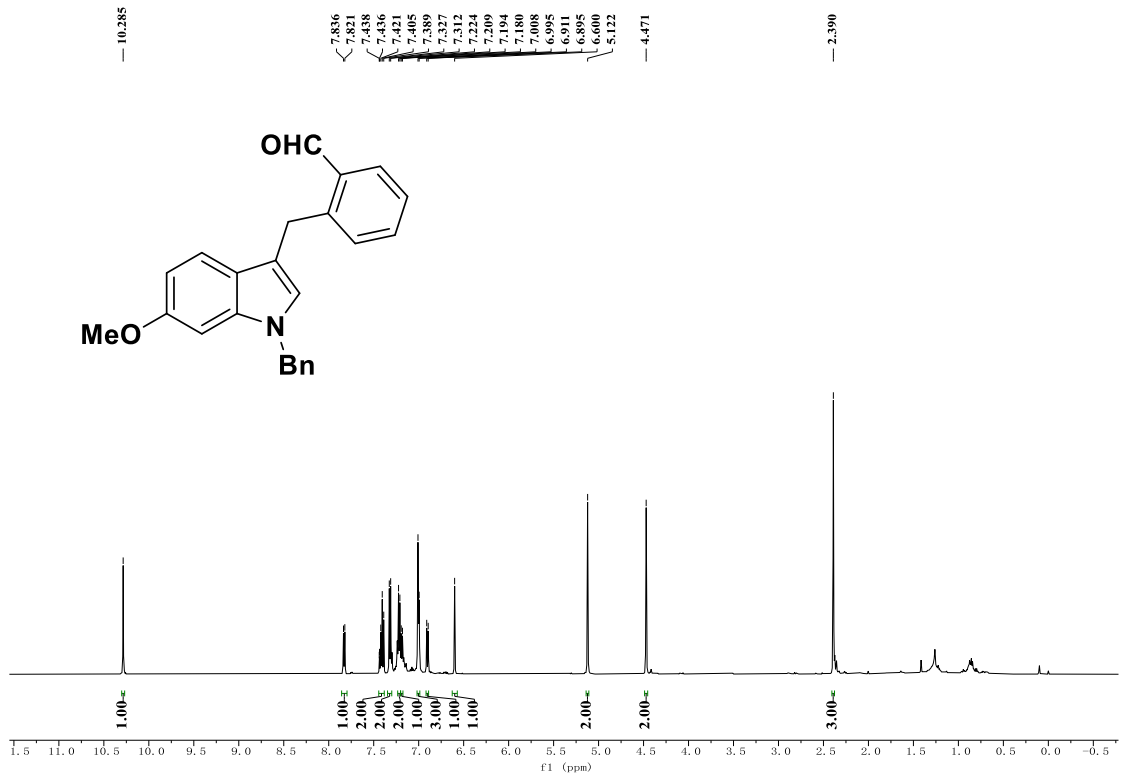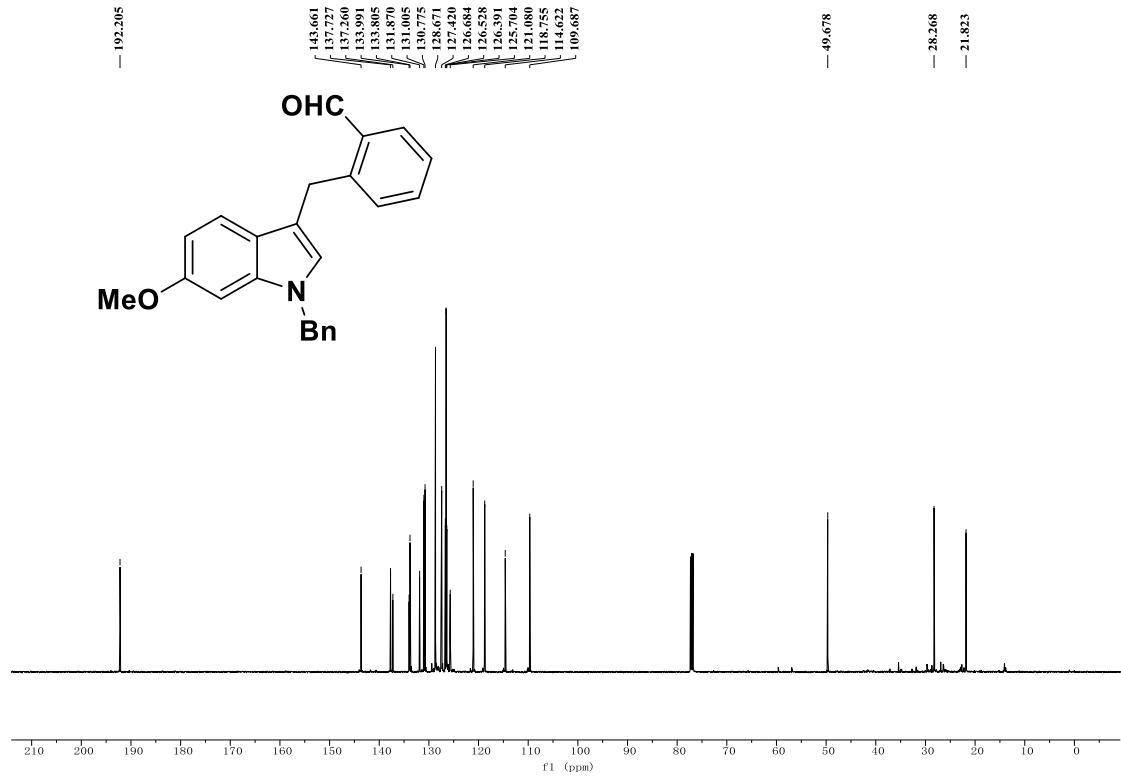

2-((1-benzyl-6-fluoro-1H-indol-3-yl)methyl)benzaldehyde (4n)

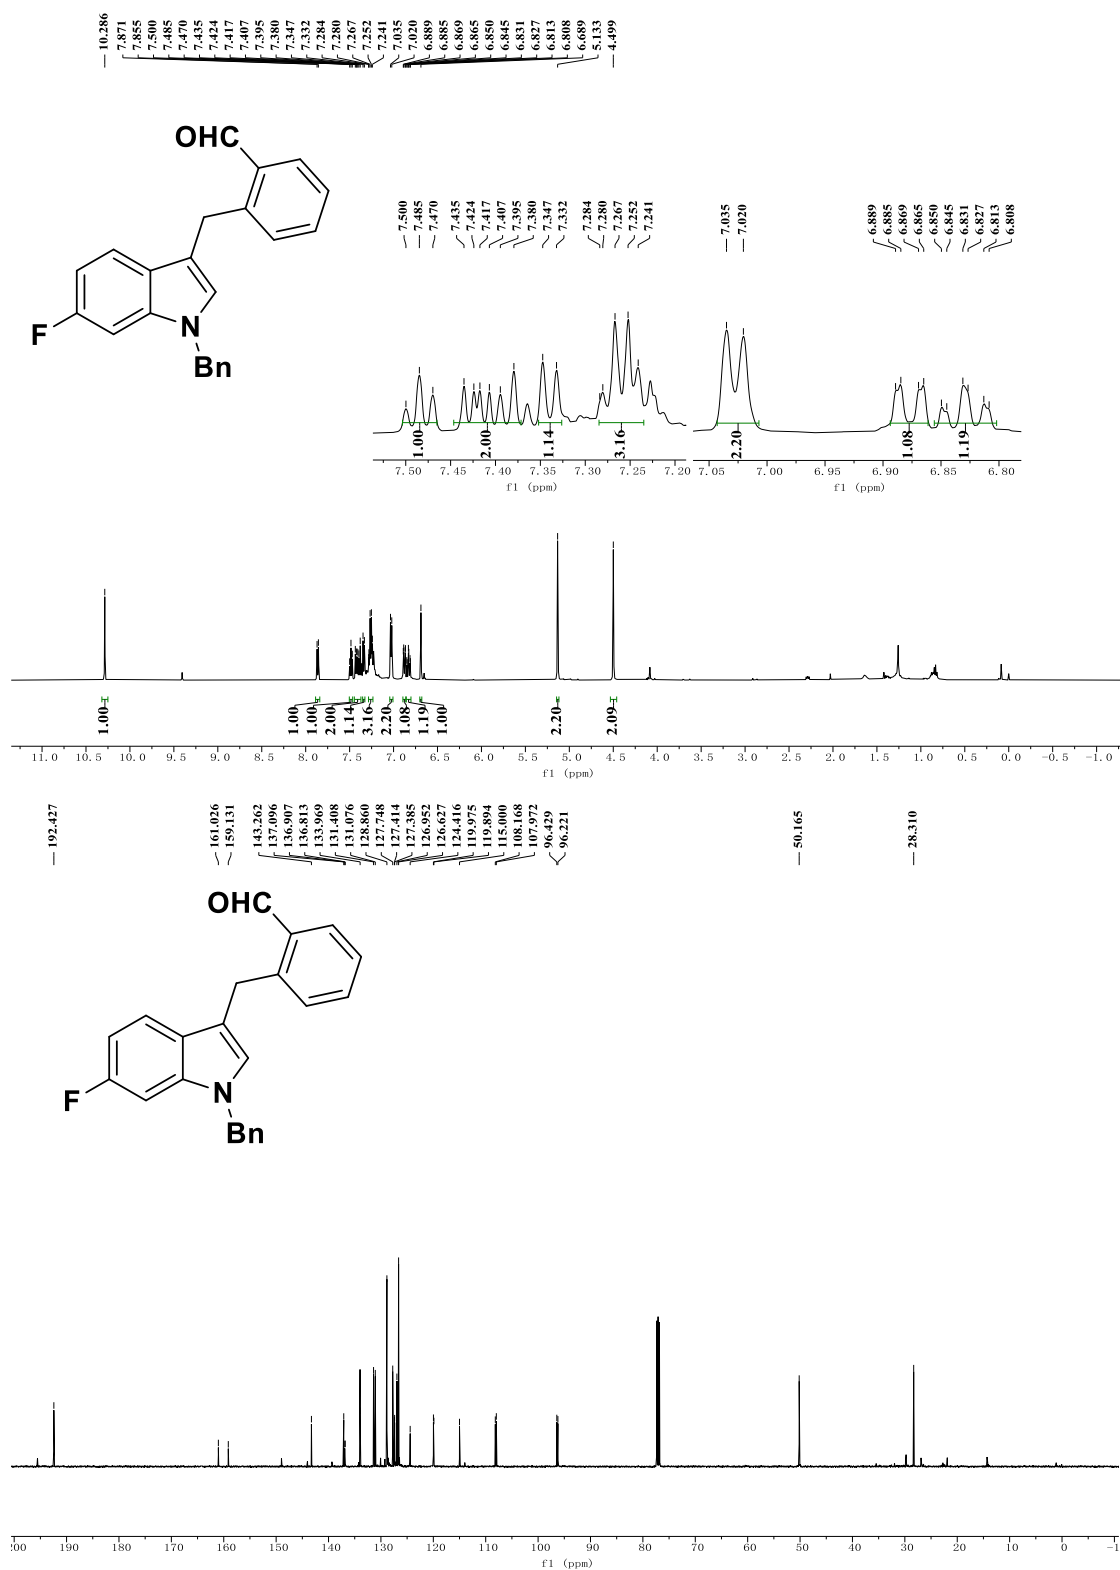

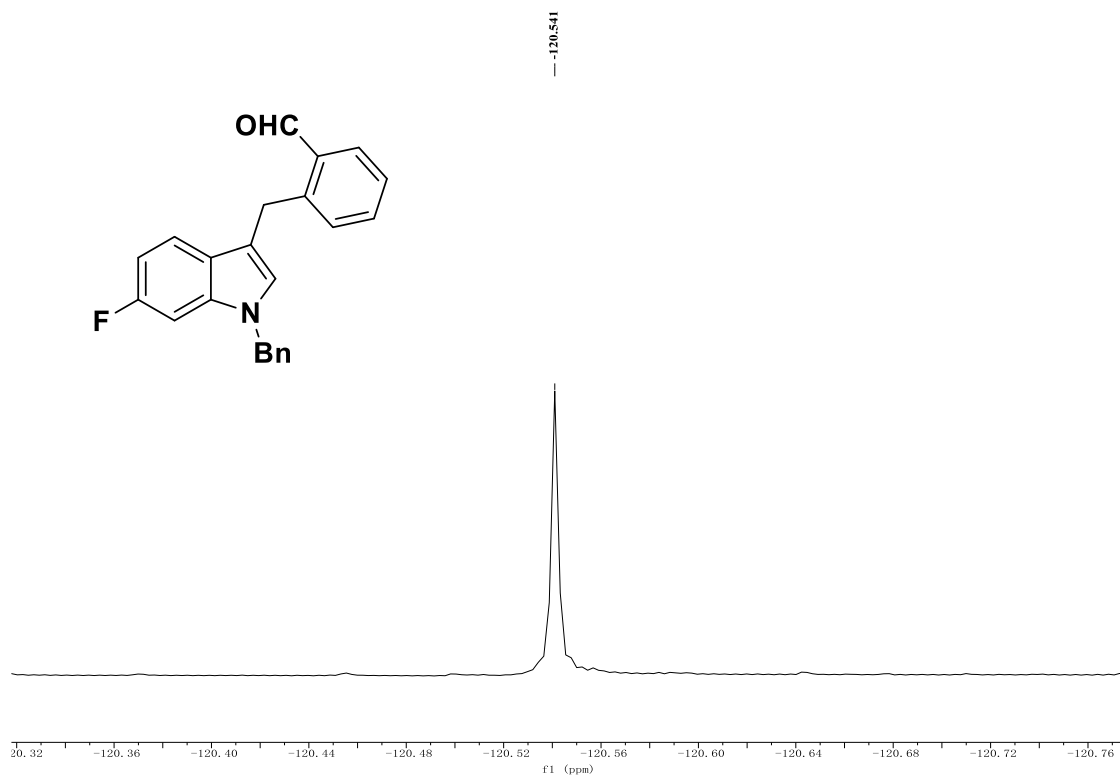

**5,6<sup>1</sup>,10b,1<sup>6</sup>b-tetrahydro-[1,3]dioxolo[4',5':6,7]chromeno[4,3,2-h]dibenzo[b,f]indolizine (3aa)**

7.395  
7.380  
7.364  
7.361  
7.358  
7.353  
7.345  
7.340  
7.328  
7.323  
7.300  
7.294  
7.288  
7.278  
7.155  
7.151  
7.139  
7.137  
7.124  
7.122  
6.685  
6.670  
6.655  
6.352  
6.342  
6.339  
6.336  
6.006  
6.003  
5.856  
5.839  
5.752  
5.749  
5.701  
5.699  
4.431  
4.424  
4.414  
4.407  
4.340  
4.309  
4.234  
4.204  
4.193  
4.186

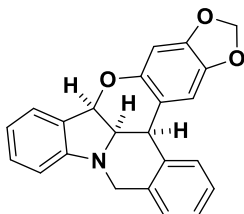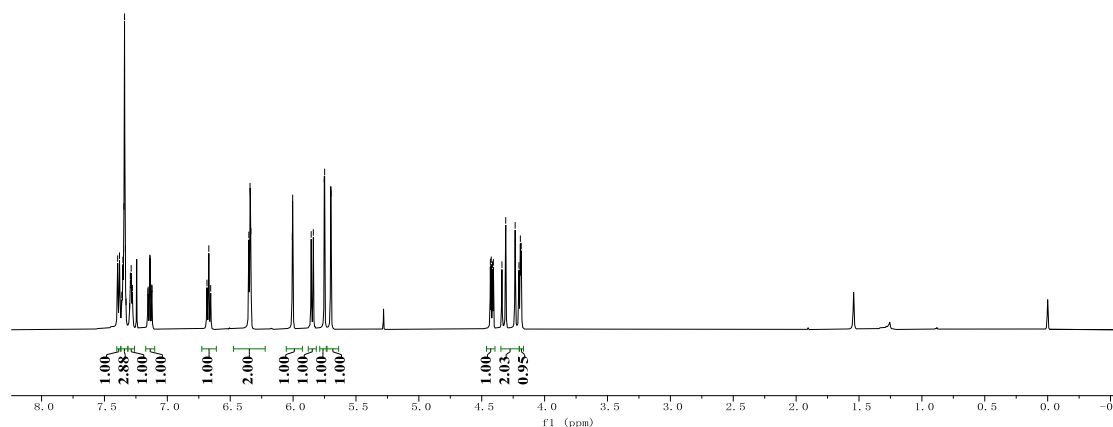

152.009  
148.852  
146.134  
142.242  
134.551  
133.518  
130.882  
130.534  
127.514  
127.464  
126.686  
126.219  
120.417  
117.431  
107.248  
106.026  
100.833  
100.736  
78.387  
61.978  
46.428  
38.265

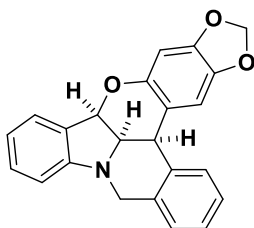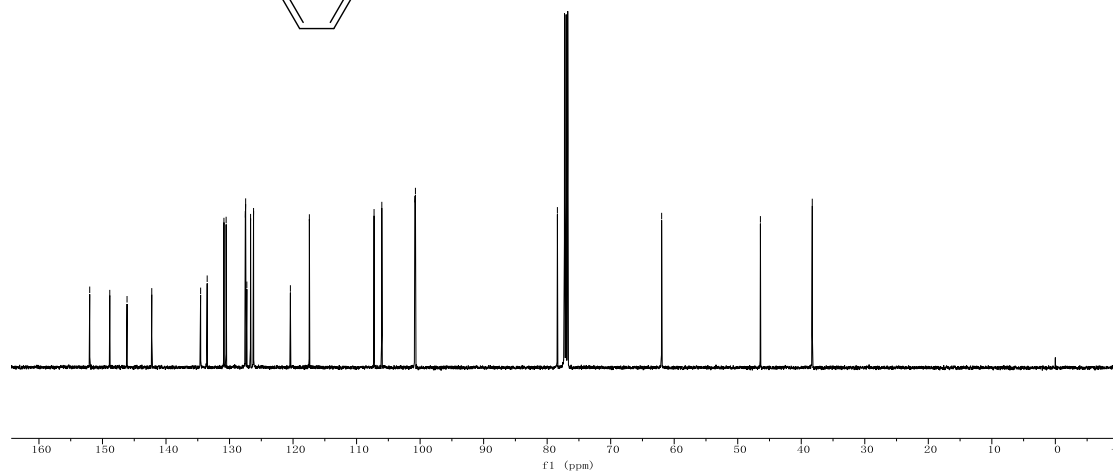

**10-methyl-5,6,10b,16b-tetrahydro-[1,3]dioxolo[4',5':6,7]chromeno[4,3,2-h]dibenzo[b,f]indolizine (3ba)**

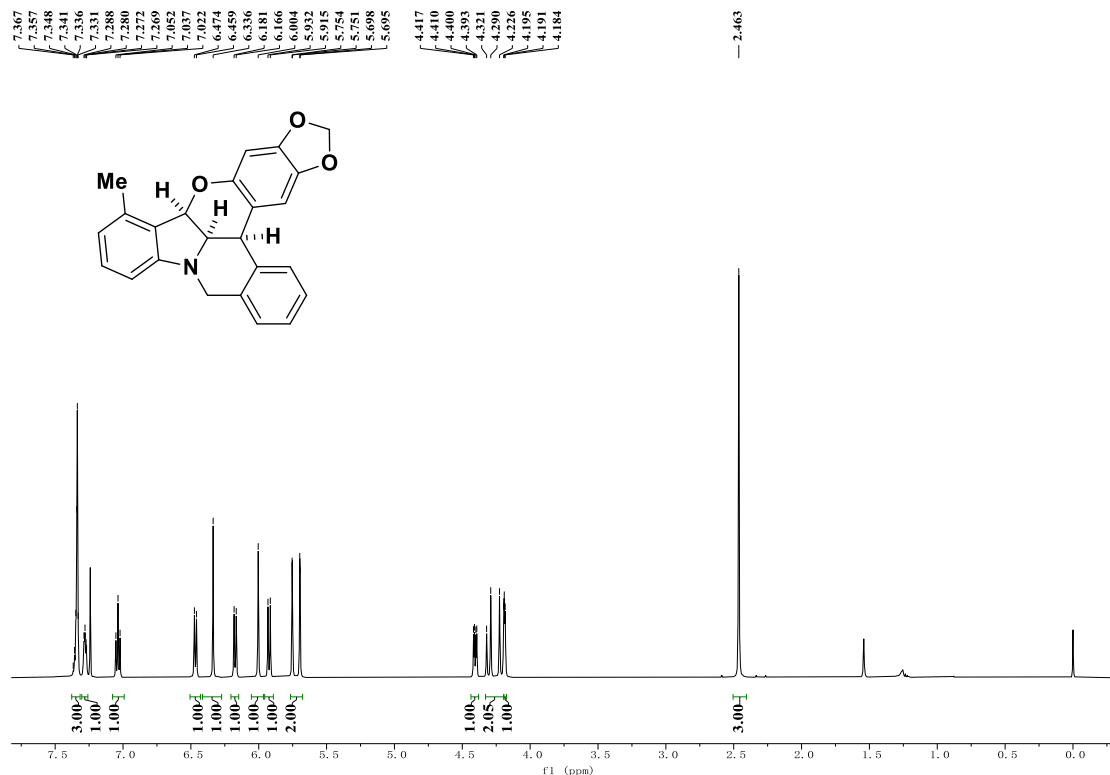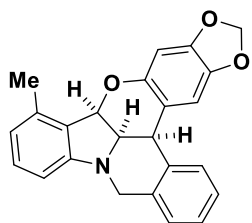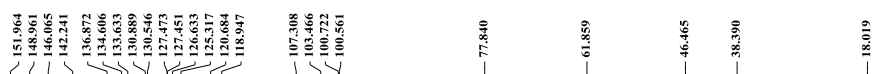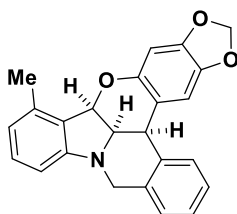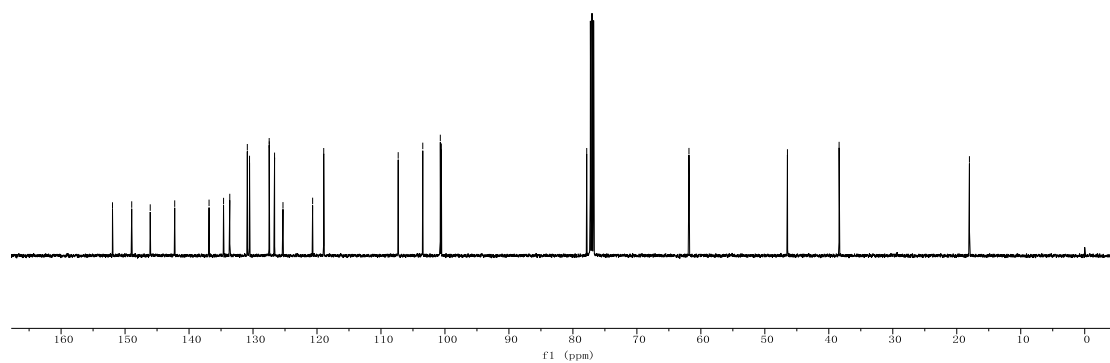

**10-fluoro-5,6<sup>l</sup>,10b,16b-tetrahydro-[1,3]dioxolo[4',5':6,7]chromeno[4,3,2-h]dibenzo[b,f]indolizine (3ca)**

7.385  
7.378  
7.372  
7.370  
7.366  
7.363  
7.357  
7.351  
7.349  
7.344  
7.338  
7.329  
7.329  
7.321  
7.316  
7.314  
7.310  
7.093  
7.082  
7.077  
7.066  
6.426  
6.348  
6.331  
6.314  
6.314  
6.106  
6.090  
6.079  
6.062  
5.975  
5.973  
5.770  
5.767  
5.732  
5.729  
4.490  
4.483  
4.472  
4.466  
4.357  
4.326  
4.233  
4.183  
4.157  
4.151

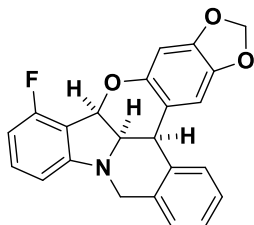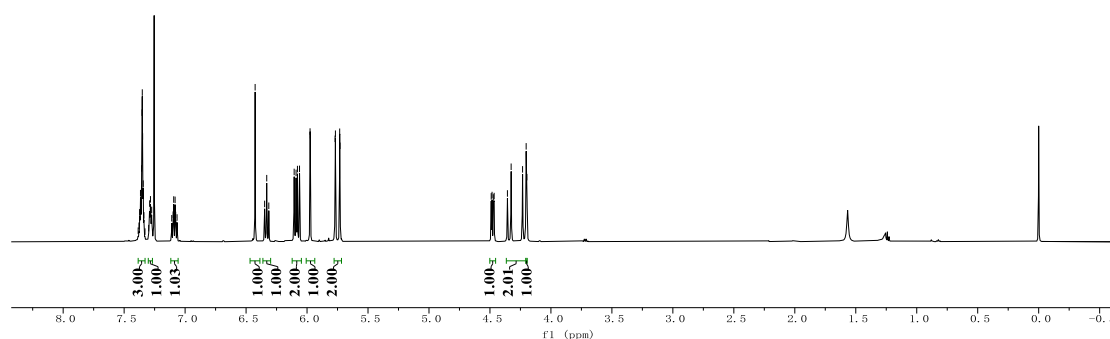

161.748  
159.764  
154.211  
154.143  
148.657  
146.254  
142.490  
134.226  
133.044  
132.663  
132.590  
130.904  
130.657  
127.403  
126.848  
120.436  
112.778  
112.618  
107.218  
104.496  
104.331  
101.765  
101.744  
100.878  
100.814  
75.876  
62.489  
46.354  
38.320

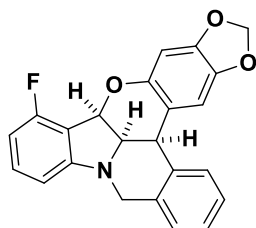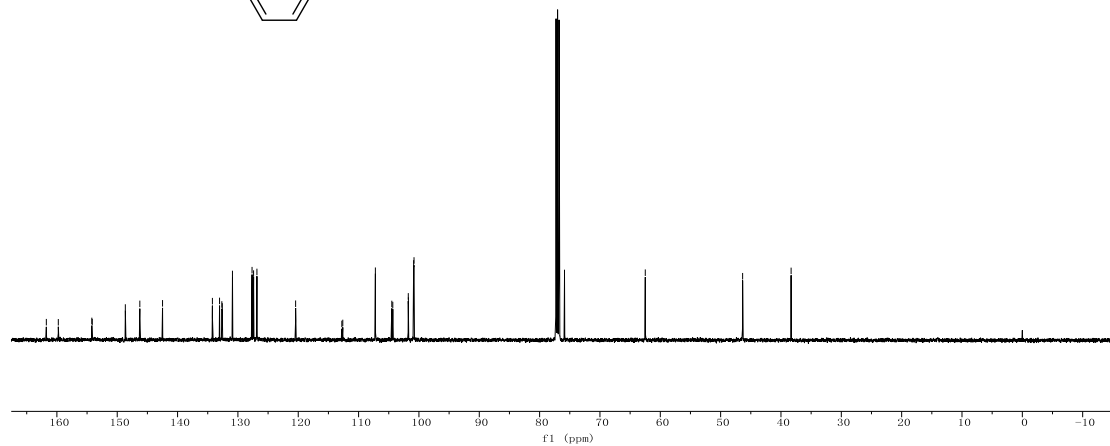

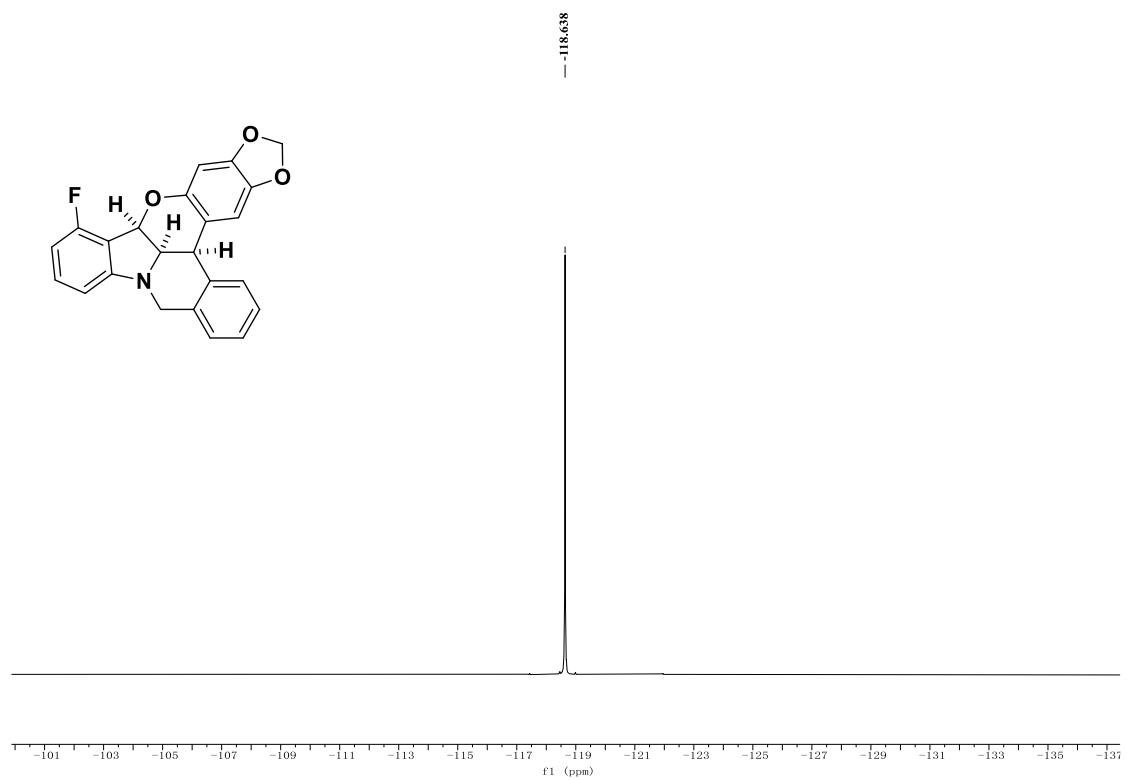



**10-chloro-5,6<sup>1</sup>,10b,16b-tetrahydro-[1,3]dioxolo[4',5':6,7]chromeno[4,3,2-h]dibenzo[b,f]indolizine (3da)**

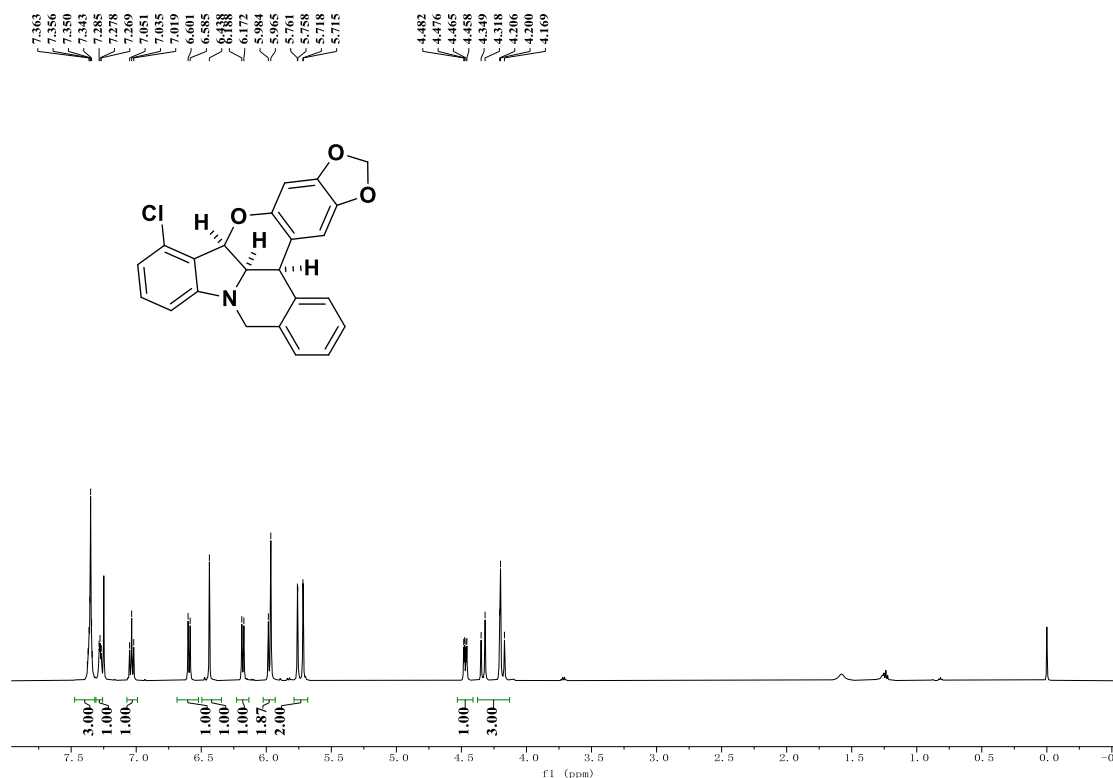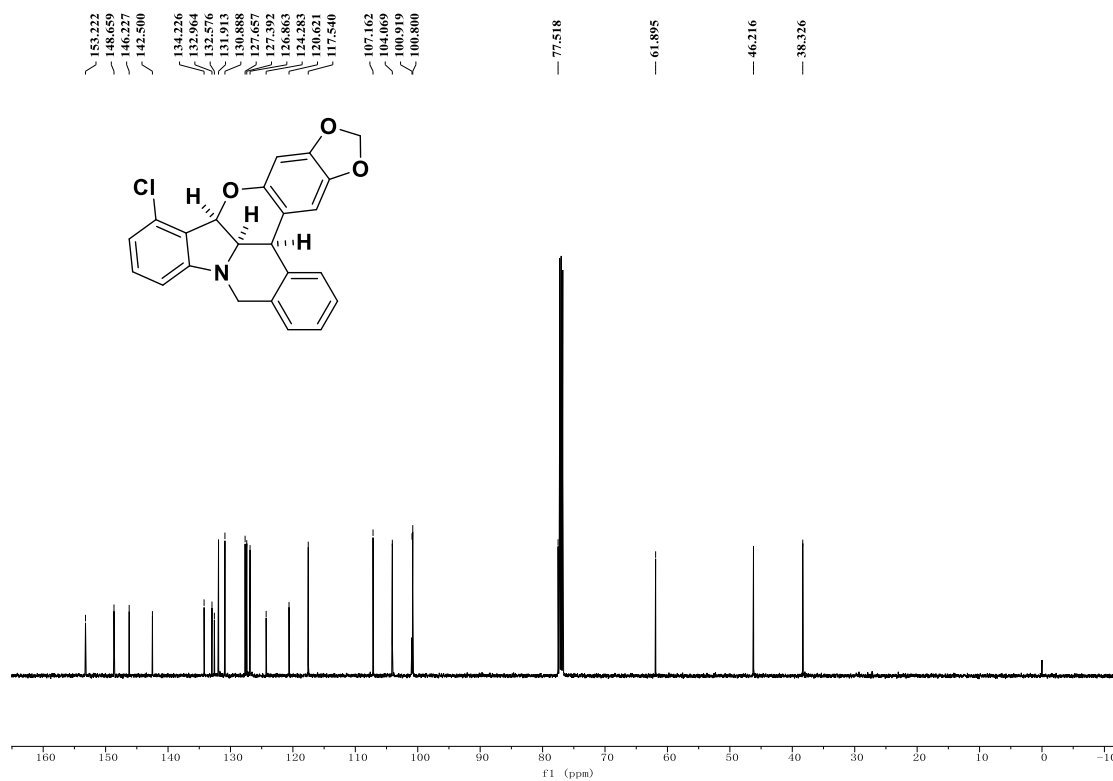

**9-methyl-5,6<sup>l</sup>,10b,16b-tetrahydro-[1,3]dioxolo[4',5':6,7]chromeno[4,3,2-h]dibenzo[b,f]indolizine (3ea).**

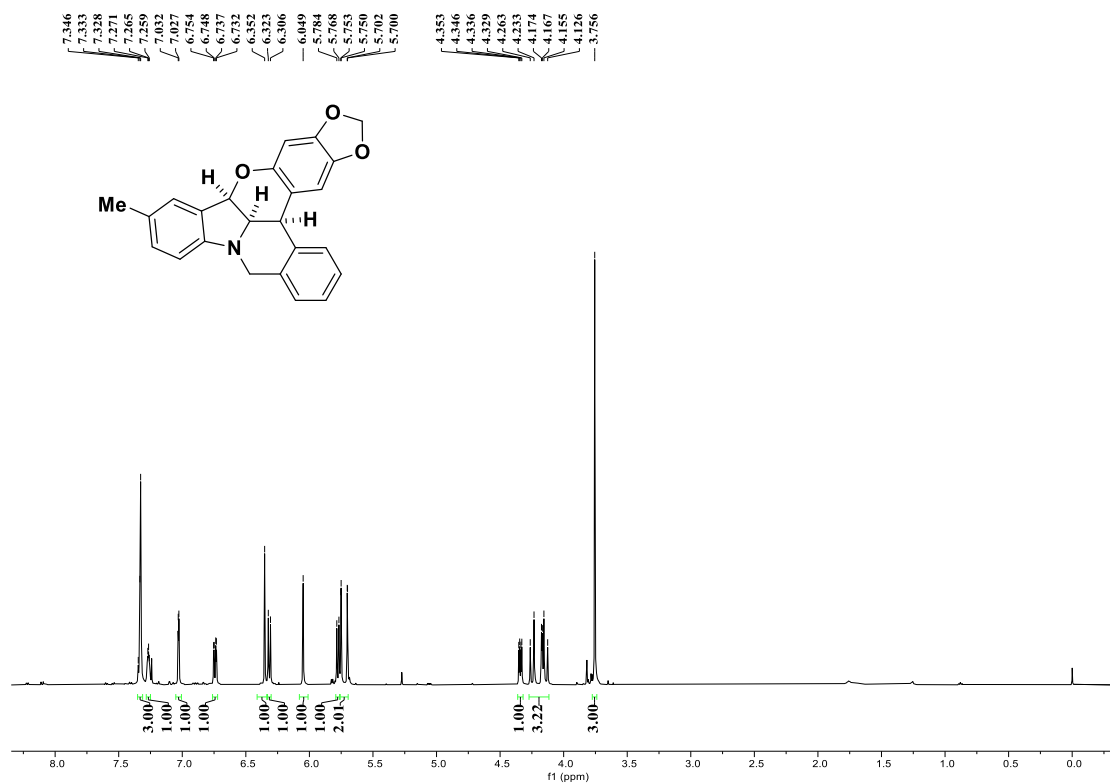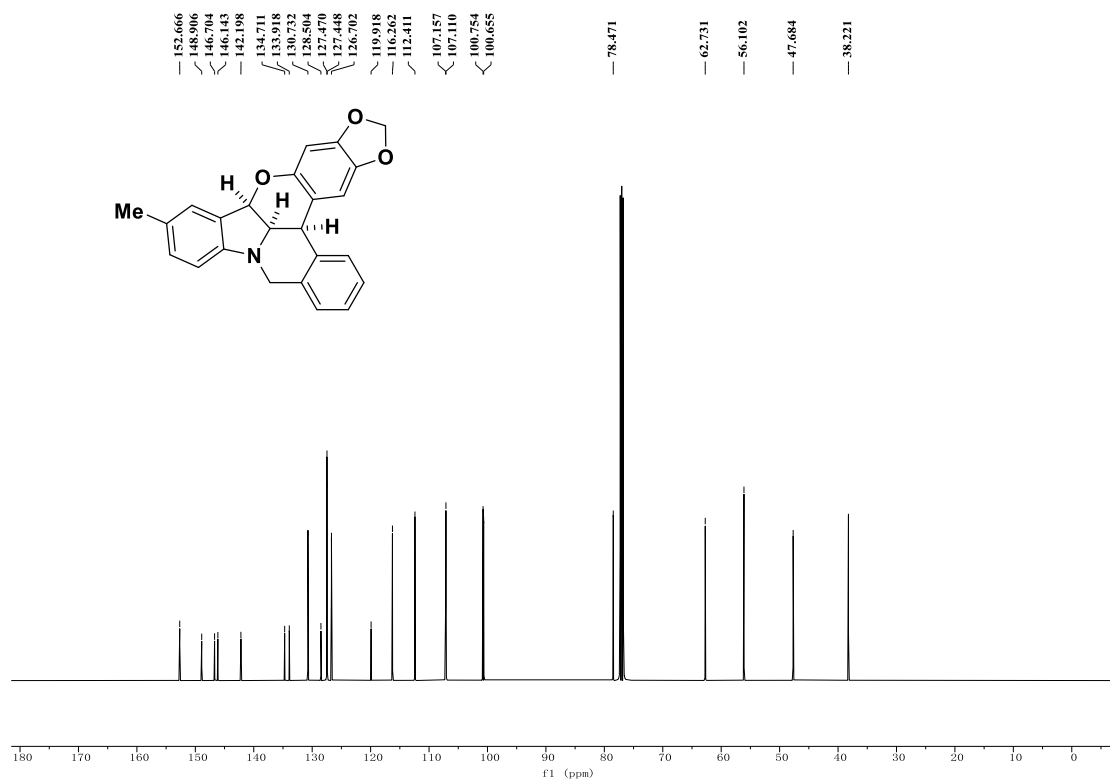

**9-methoxy-5,6<sup>1</sup>,10b,16b-tetrahydro-[1,3]dioxolo[4',5':6,7]chromeno[4,3,2-hi]dibenzo[b,f]indolizine (3fa).**

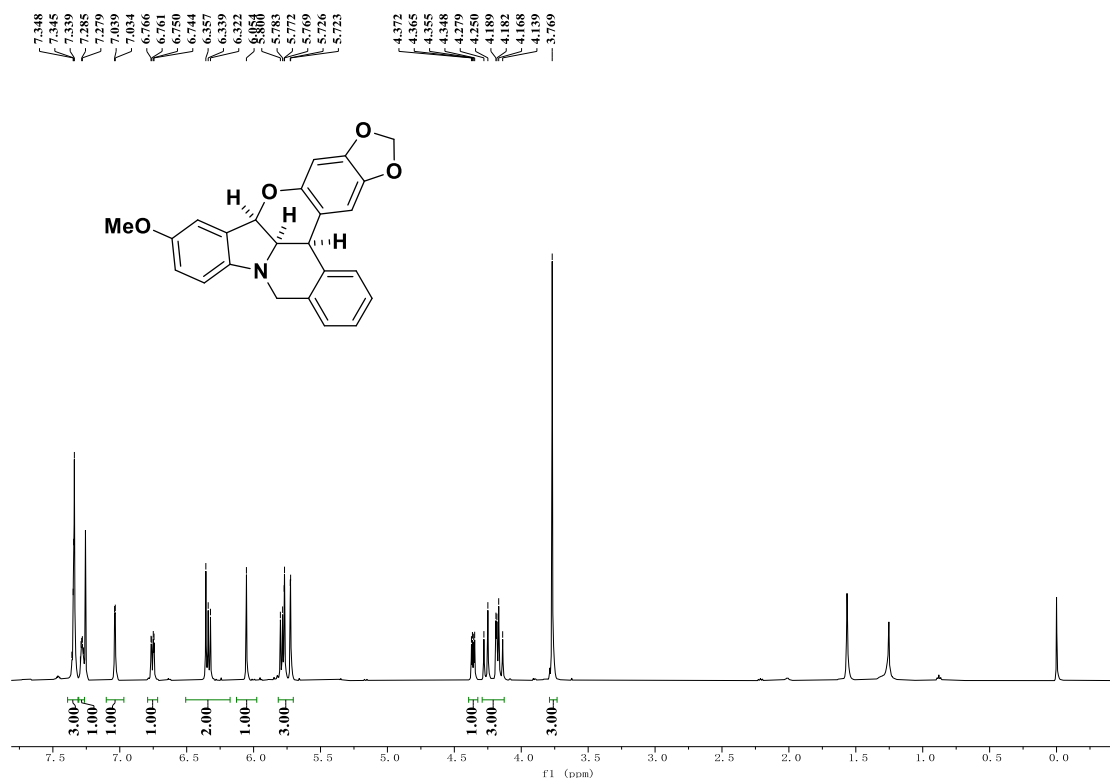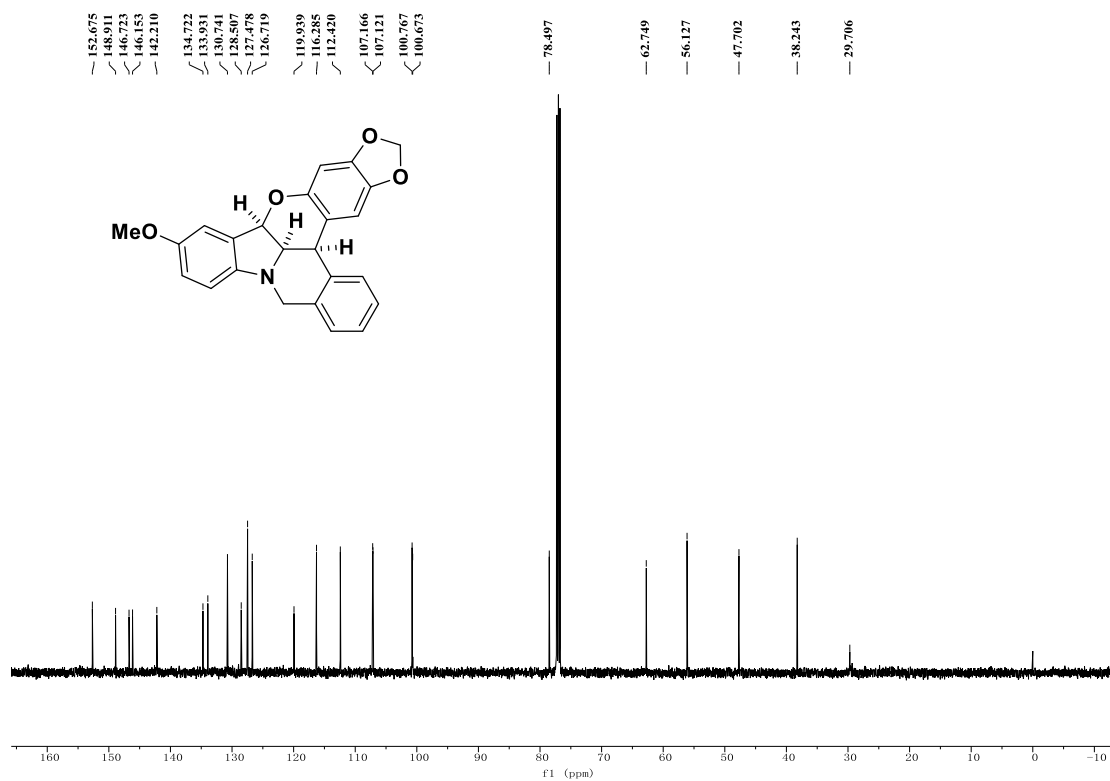

**9-fluoro-5,6<sup>1</sup>,10b,16b-tetrahydro-[1,3]dioxolo[4',5':6,7]chromeno[4,3,2-h]dibenzo[b,f]indolizine (3ga)**

7.375  
7.368  
7.362  
7.355  
7.352  
7.348  
7.343  
7.339  
7.334  
7.328  
7.320  
7.318  
7.295  
7.287  
7.279  
7.171  
7.151  
7.116  
7.105  
7.100  
6.864  
6.859  
6.859  
6.847  
6.842  
6.829  
6.824  
6.353  
6.257  
6.249  
6.240  
6.232  
6.008  
6.006  
5.810  
5.793  
5.765  
5.762  
5.722  
5.719  
4.433  
4.426  
4.416  
4.409  
4.396  
4.386  
4.178  
4.171  
4.145  
4.116

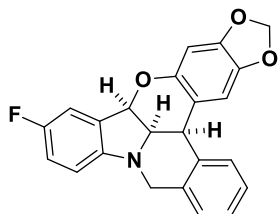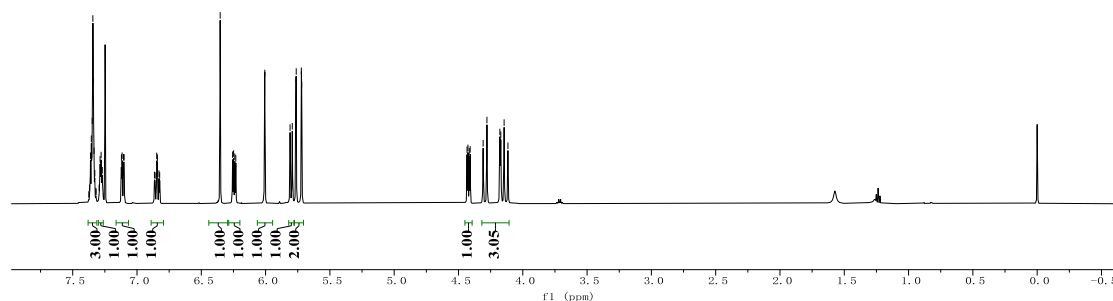

156.924  
155.057  
148.662  
148.478  
146.240  
142.388  
134.396  
133.476  
130.765  
128.370  
128.310  
127.588  
126.853  
120.938  
116.933  
116.745  
113.385  
113.196  
107.157  
106.343  
106.279  
100.819  
100.784

78.126  
78.108  
62.595  
47.126  
38.261

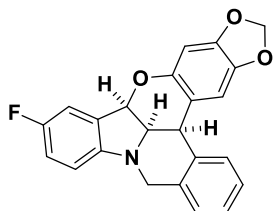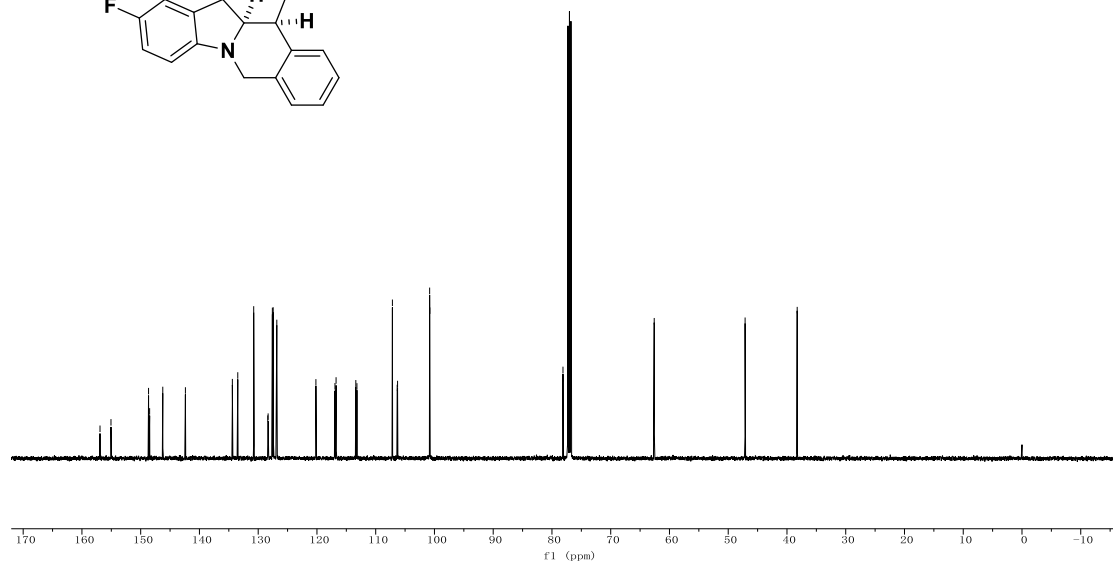

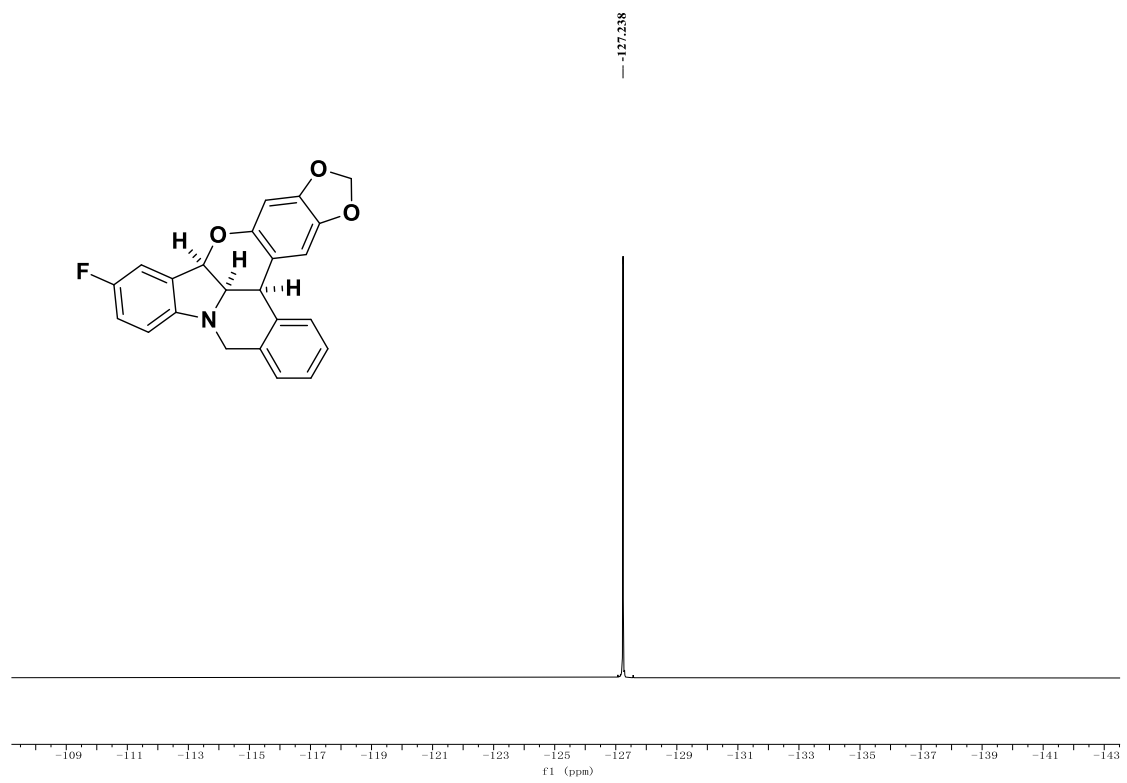

**9-chloro-5,6<sup>1</sup>,10b,16b-tetrahydro-[1,3]dioxolo[4',5':6,7]chromeno[4,3,2-hi]dibenzo[b,f]indolizine (3ha)**

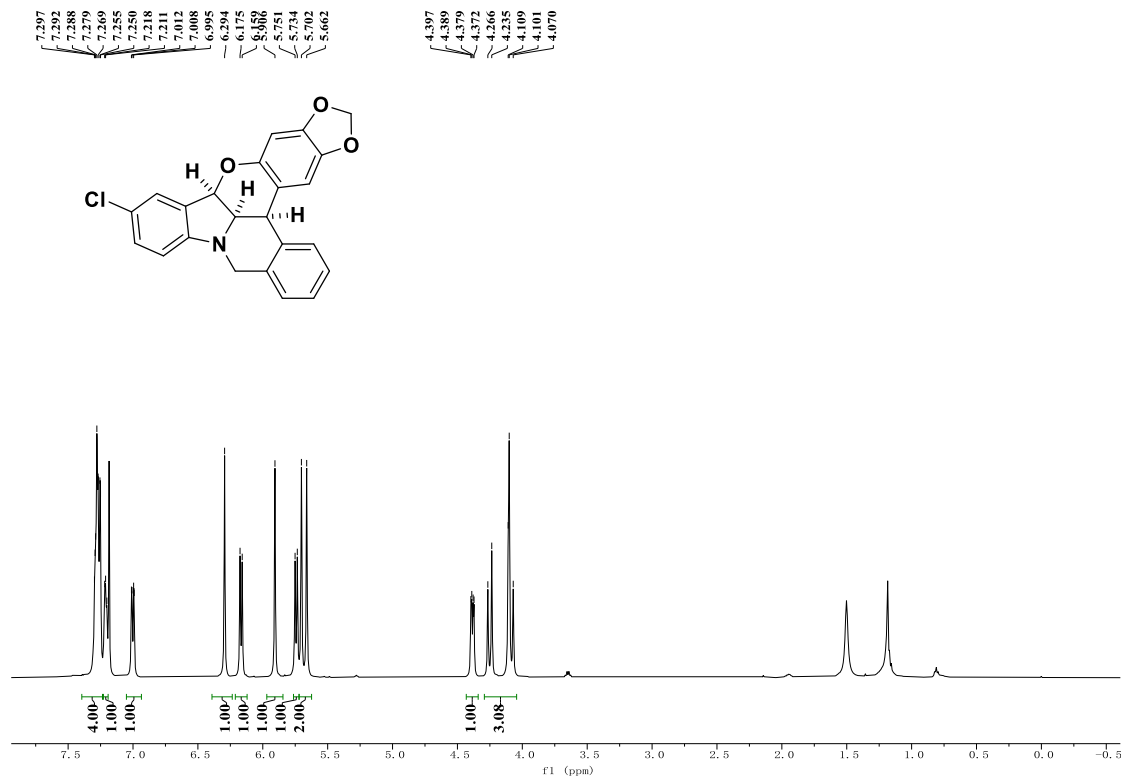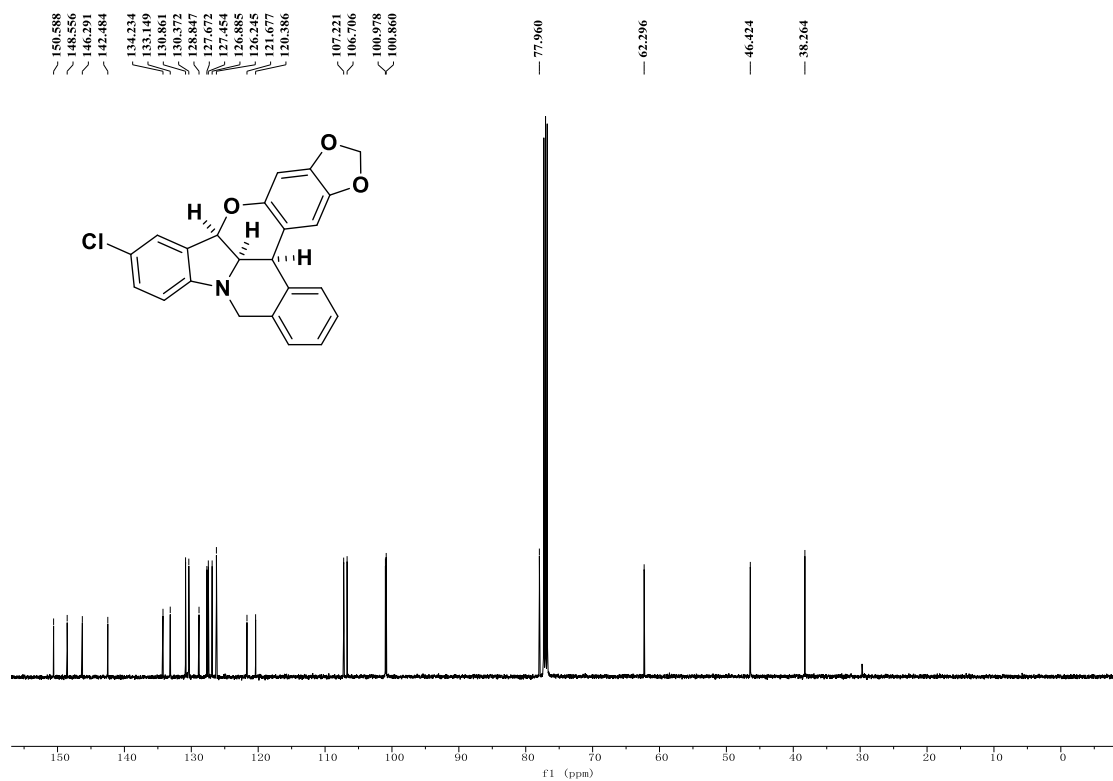

**8-fluoro-5,6<sup>1</sup>,10b,16b-tetrahydro-[1,3]dioxolo[4',5':6,7]chromeno[4,3,2-h]dibenzo[b,f]indolizine (3ia)**

7.304  
7.300  
7.290  
7.286  
7.279  
7.272  
7.267  
7.256  
7.252  
7.248  
7.243  
7.237  
7.213  
7.207  
7.201  
7.195  
7.185  
6.262  
6.248  
6.244  
6.232  
6.228  
6.225  
6.213  
6.208  
5.921  
5.916  
5.901  
5.896  
5.885  
5.883  
5.746  
5.728  
5.686  
5.683  
5.646  
5.643  
4.433  
4.426  
4.416  
4.409  
4.263  
4.233  
4.091  
4.085  
4.056

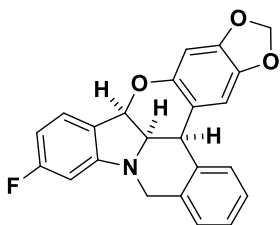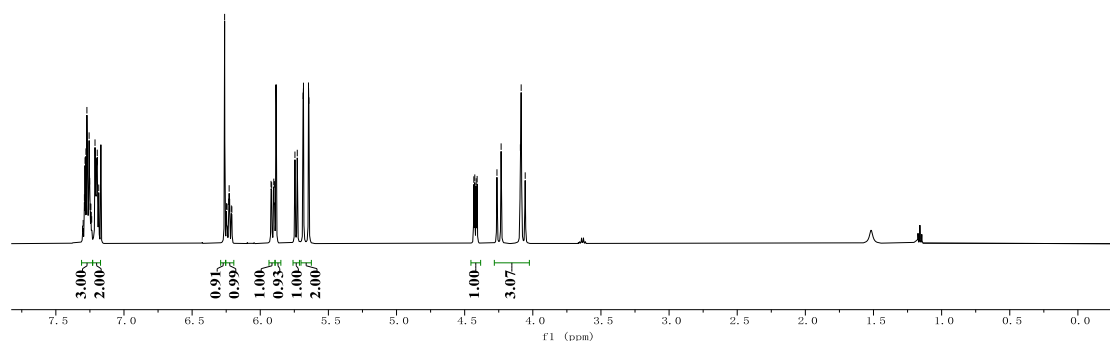

166.450  
164.506  
153.658  
153.557  
148.635  
146.294  
142.462  
134.279  
132.984  
130.878  
127.694  
127.454  
127.105  
127.017  
126.894  
122.775  
122.758  
120.661  
107.263  
103.631  
103.446  
101.019  
100.846  
93.675  
93.459  
77.891  
62.827  
46.057  
38.435

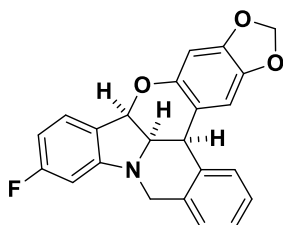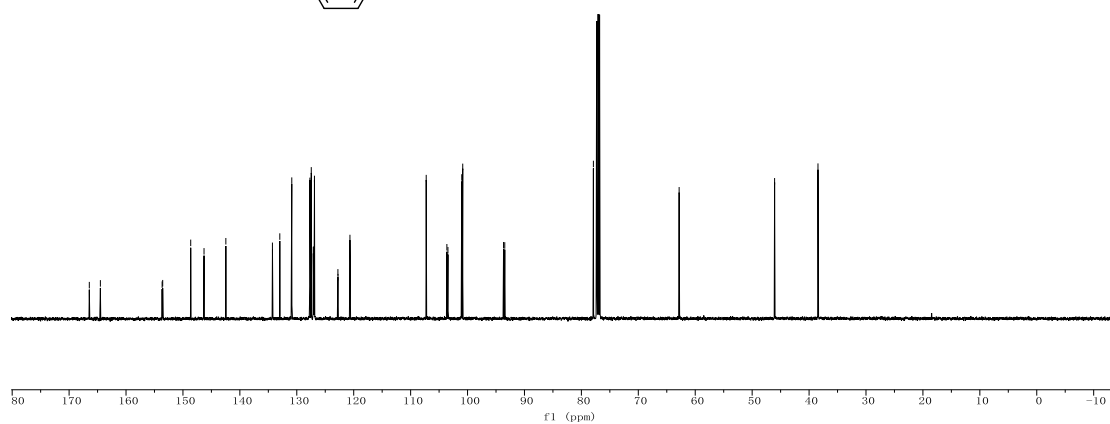

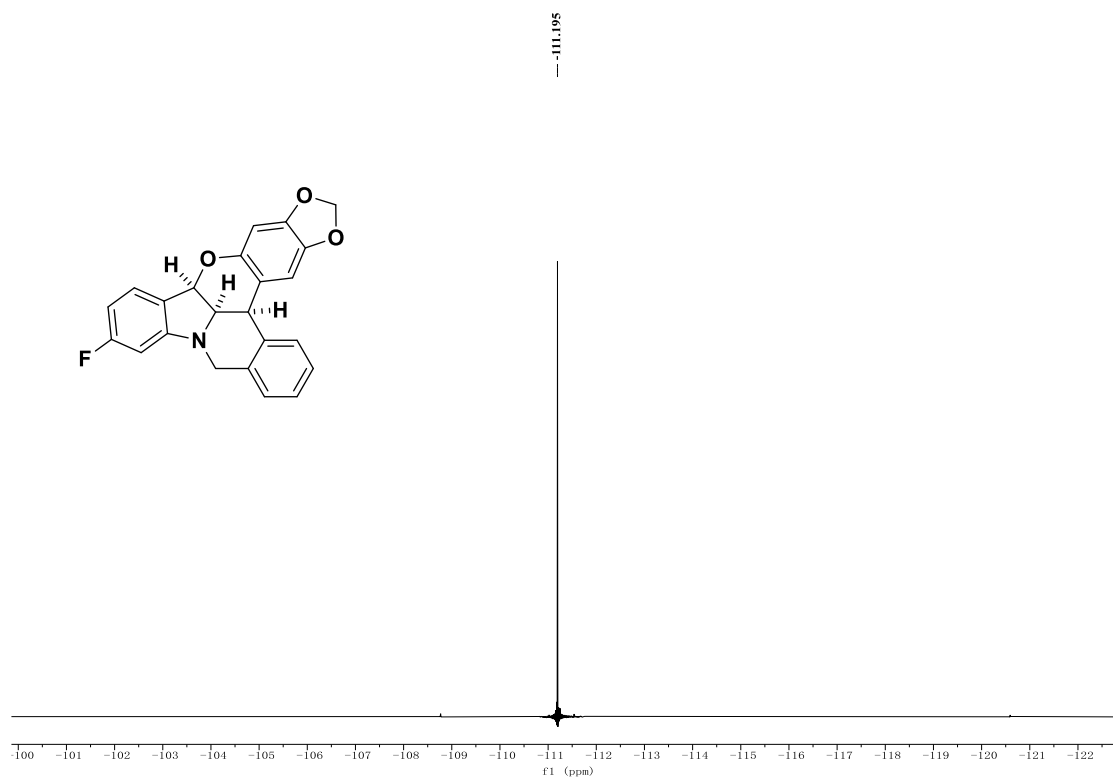



**8-methoxy-5,6<sup>1</sup>,10b,16b-tetrahydro-[1,3]dioxolo[4',5':6,7]chromeno[4,3,2-hi]dibenzo[b,f]indolizine (3ja)**

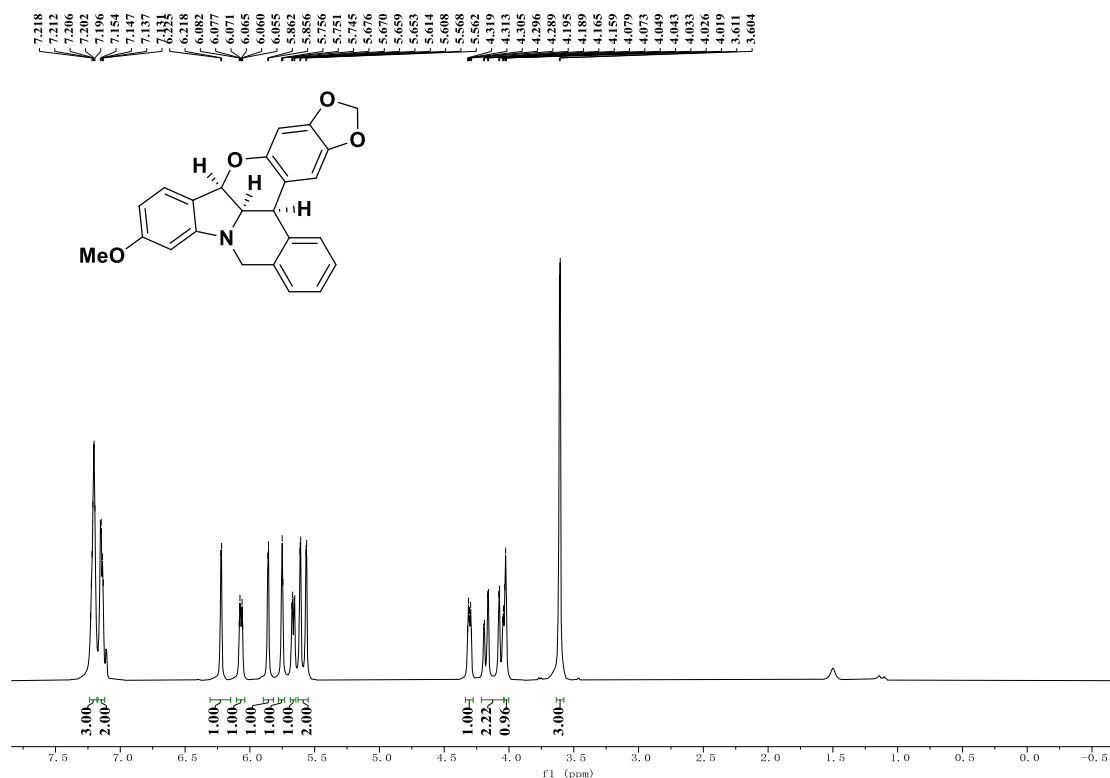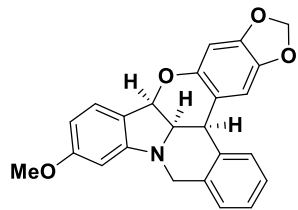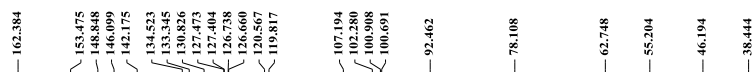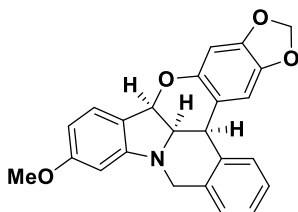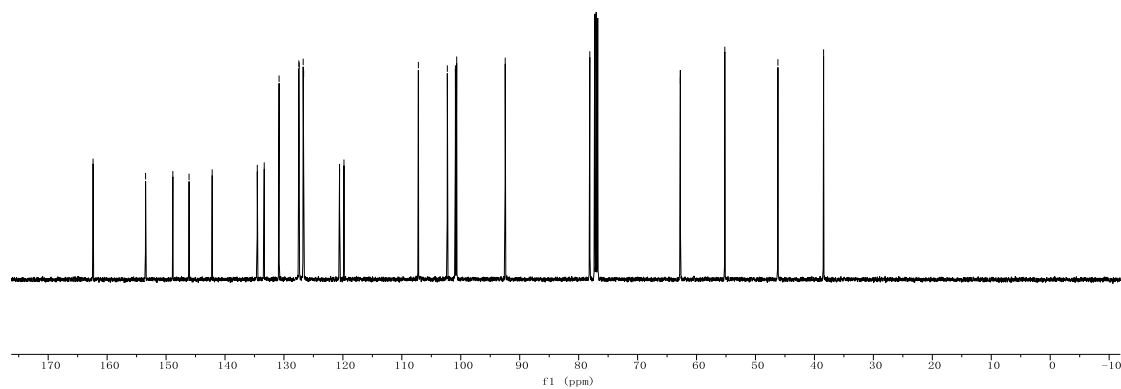

**6<sup>1</sup>-methyl-5,6<sup>1</sup>,10b,16b-tetrahydro-[1,3]dioxolo[4',5':6,7]chromeno[4,3,2-hi]dibenzo[b,f]indolizine (3ka)**

7.403  
7.387  
7.231  
7.224  
7.219  
7.216  
7.212  
7.206  
7.198  
6.825  
6.823  
6.809  
6.795  
6.792  
6.749  
6.746  
6.732  
6.725  
6.720  
6.714  
6.706  
6.692  
6.682  
6.669  
6.667  
6.663  
6.622  
6.620  
6.607  
6.604  
6.592  
6.589  
6.067  
6.009  
5.991  
5.854  
5.839  
5.486  
5.483  
5.440  
5.437  
5.019  
4.404

1.914

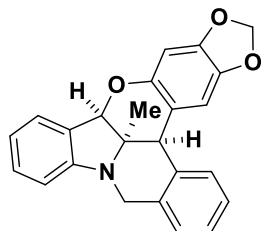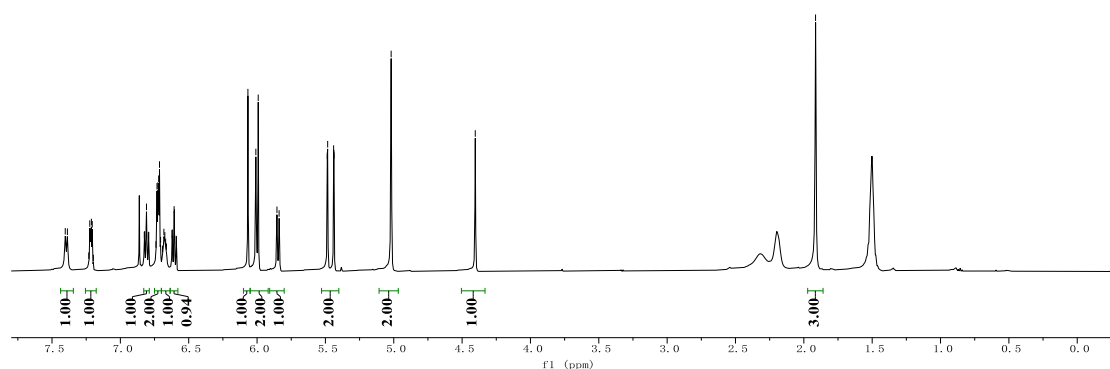

154.478  
149.974  
142.775  
141.664  
139.189  
139.121  
136.271  
130.887  
130.719  
130.682  
130.531  
128.586  
123.419  
122.413  
122.238  
111.548  
109.445  
103.384  
103.362  
101.803

55.387

47.311

25.993

15.274

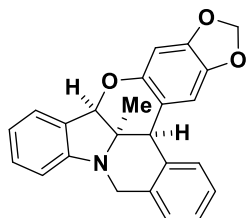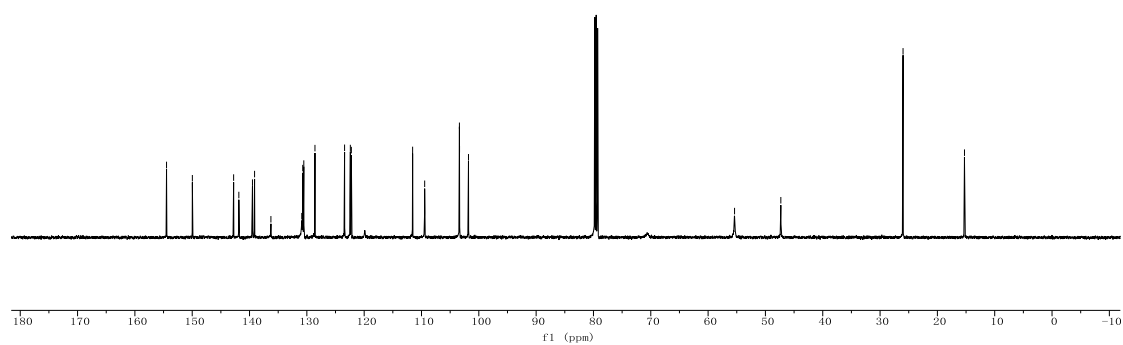

**10b-methyl-5,6<sup>1</sup>,10b,16b-tetrahydro-[1,3]dioxolo[4',5':6,7]chromeno[4,3,2-h]dibenzo[b,f]indolizine (3la)**

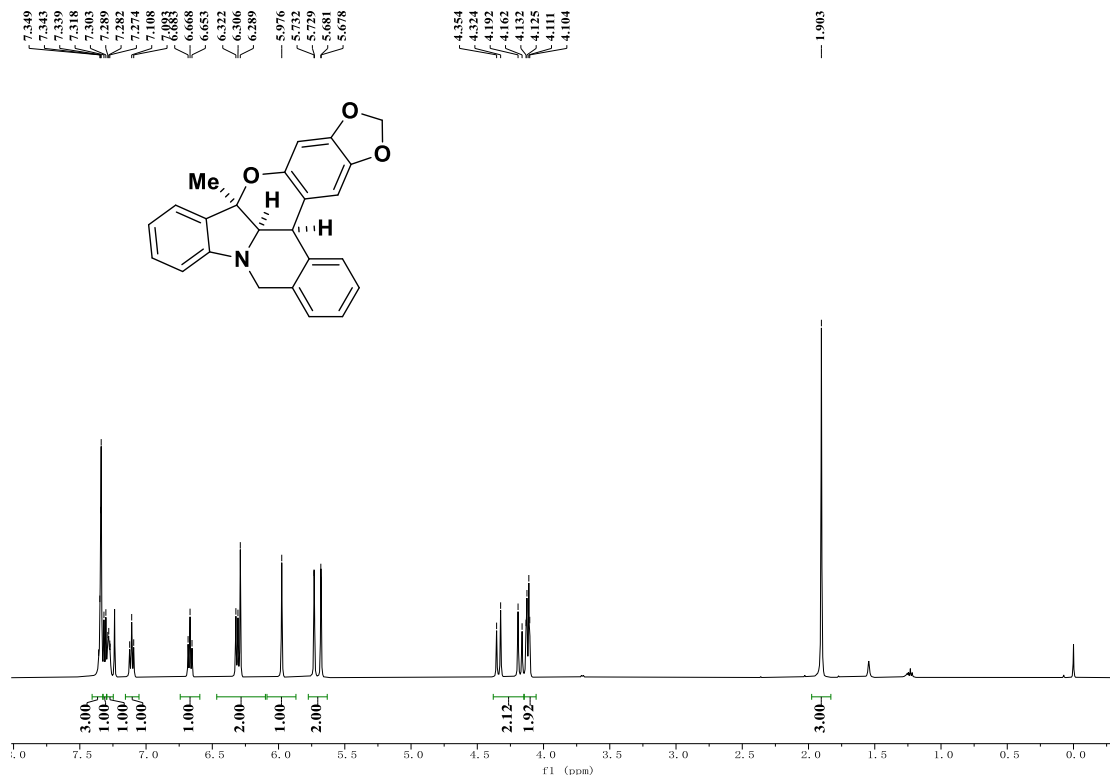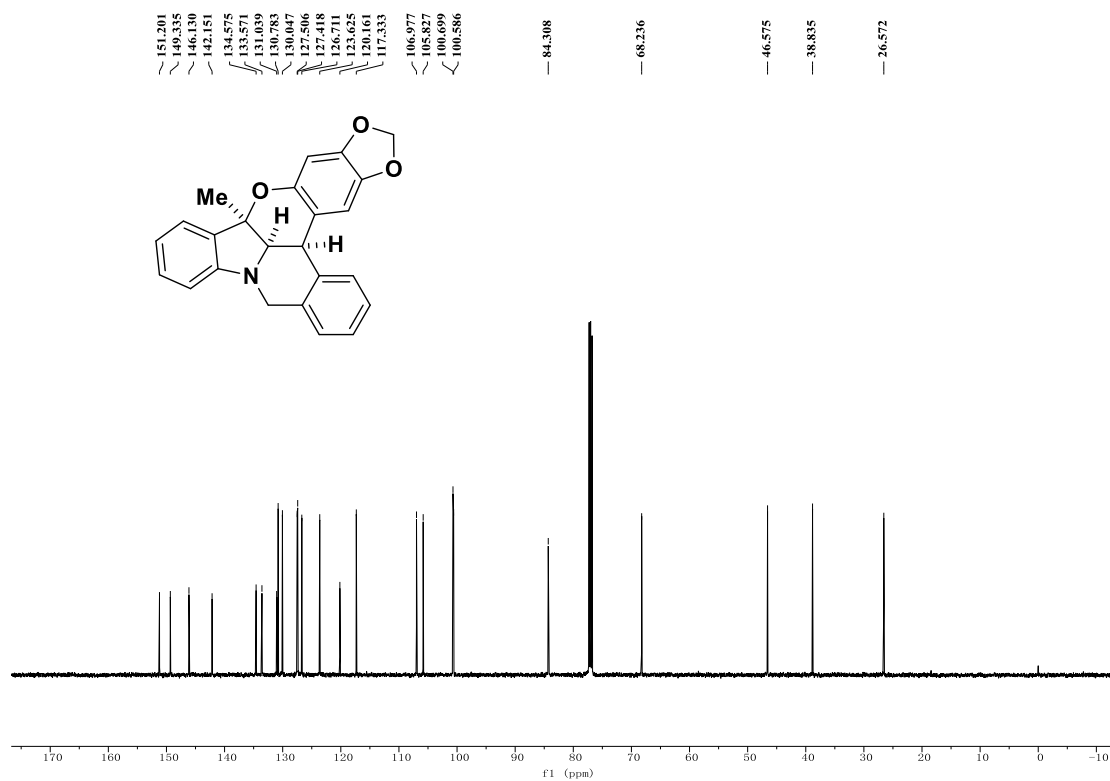

**6<sup>1</sup>,10b-dimethyl-5,6<sup>1</sup>,10b,16b-tetrahydro-[1,3]dioxolo[4',5':6,7]chromeno[4,3,2-hi]dibenzo[b,f]indolizine (3ma)**

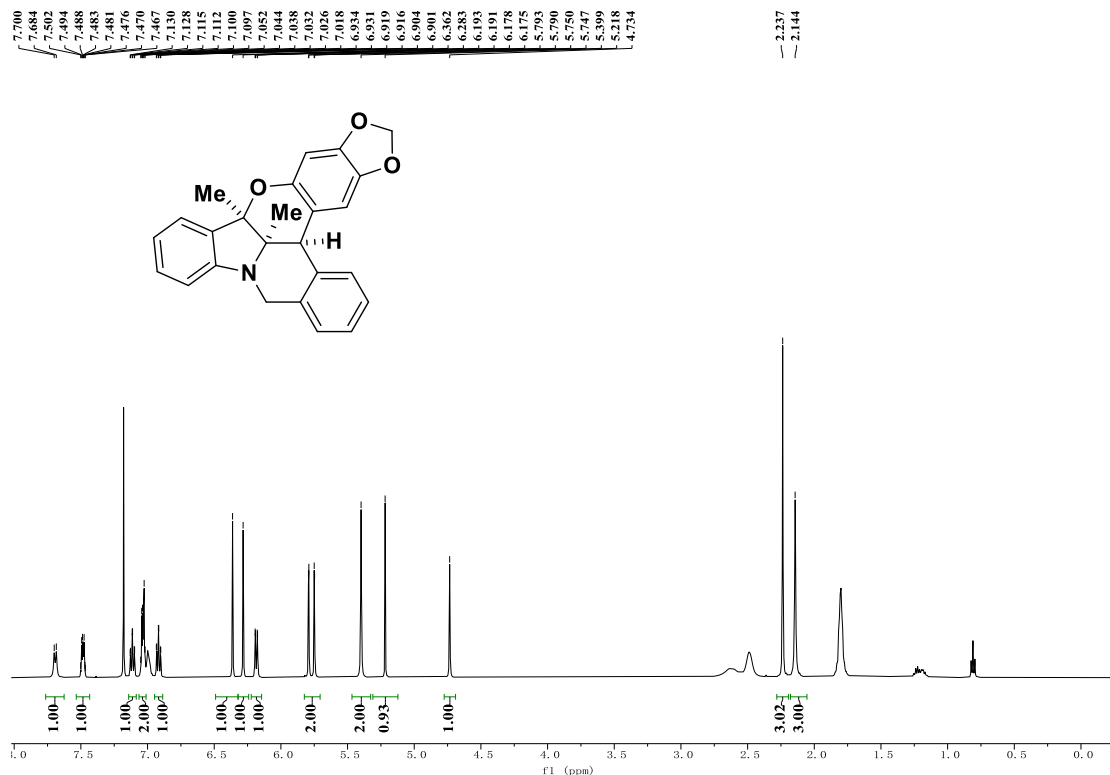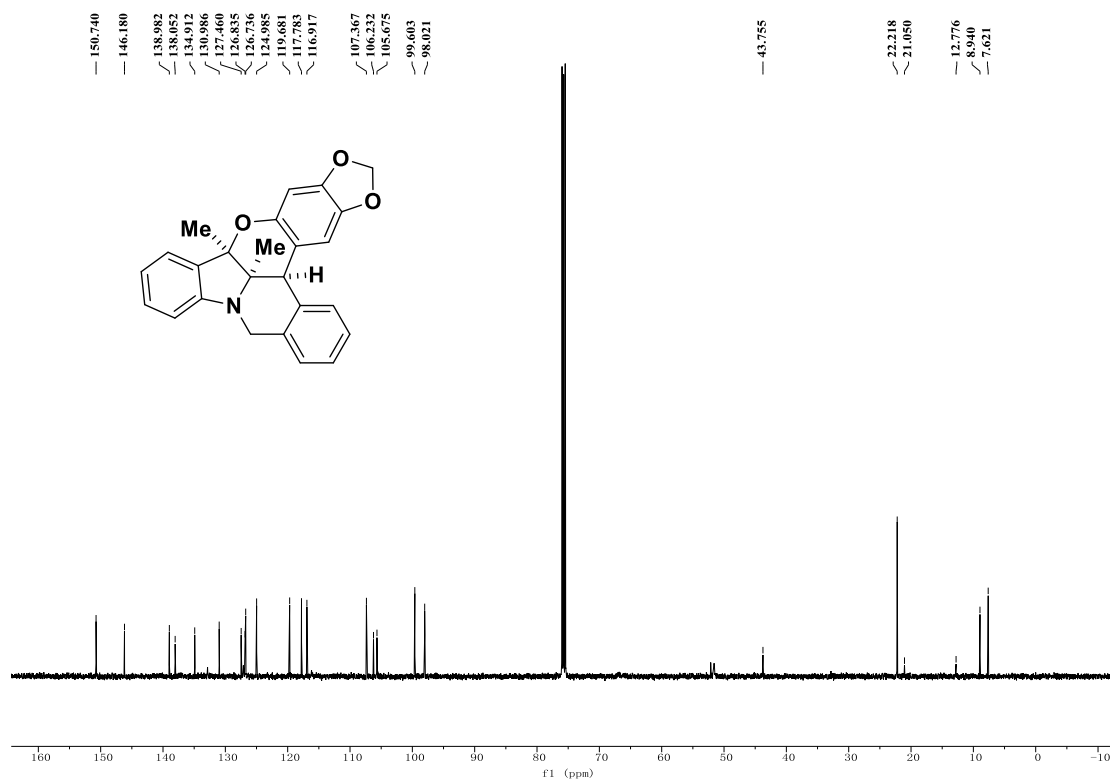

**10-butyl-5,10,10a,16b-tetrahydro-  
[1,3]dioxolo[4',5':6,7]indeno[2',1':3,4]chromeno[2,3-b]indole (5aa)**

7.237, 7.223, 7.209, 7.195, 7.182, 7.179, 7.172, 7.169, 7.160, 7.157, 7.154, 7.143, 7.140, 7.057, 7.054, 7.051, 7.048, 7.040, 7.036, 7.033, 7.025, 7.023, 6.980, 6.966, 6.655, 6.650, 6.644, 6.611, 6.609, 6.596, 6.595, 6.415, 6.364, 6.346, 5.814, 5.811, 5.779, 5.776, 5.310, 4.346, 3.369, 3.324, 3.312, 3.307, 3.294, 3.268, 3.255, 3.250, 3.238, 3.223, 3.191, 1.675, 1.671, 1.662, 1.658, 1.654, 1.648, 1.645, 1.641, 1.635, 1.631, 1.621, 1.619, 1.395, 1.380, 1.365, 1.350, 0.966, 0.951, 0.936

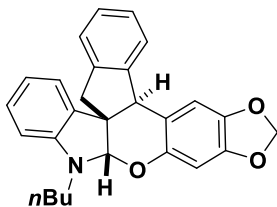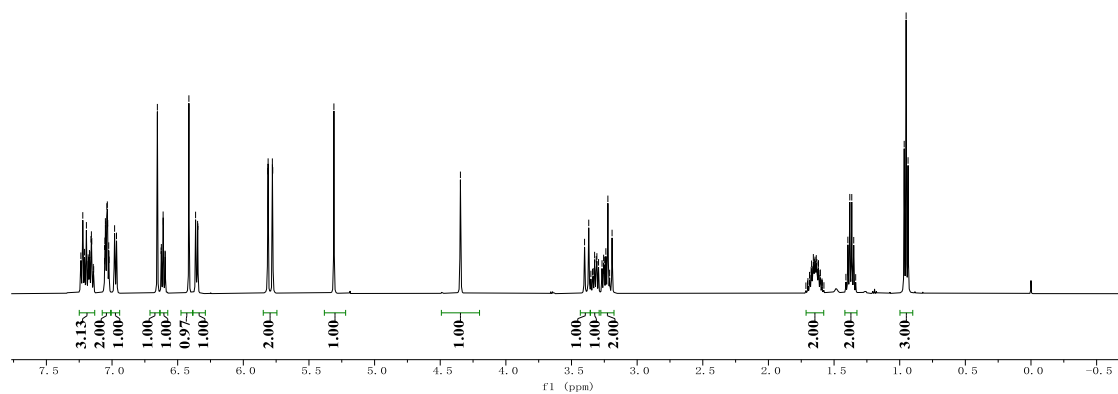

149.812, 147.132, 146.940, 144.627, 142.195, 140.274, 132.093, 128.383, 127.372, 127.085, 124.619, 123.894, 122.150, 117.436, 117.438, 108.576, 105.396, 100.870, 100.800, 100.508, 58.471, 51.817, 46.256, 44.254, 29.623, 20.409, 15.950

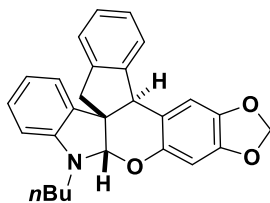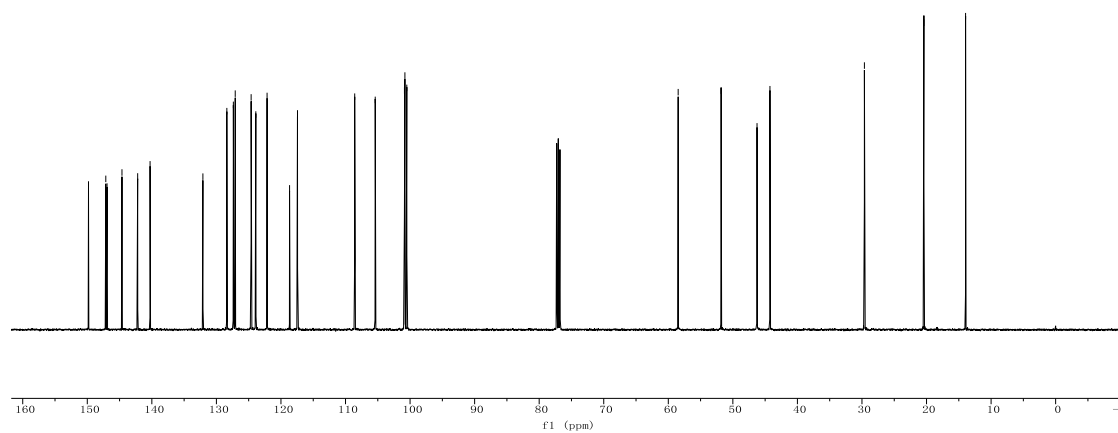

**10-benzyl-5,10,10a,16b-tetrahydro-  
[1,3]dioxolo[4',5':6,7]indeno[2',1':3,4]chromeno[2,3-b]indole (5ba)**

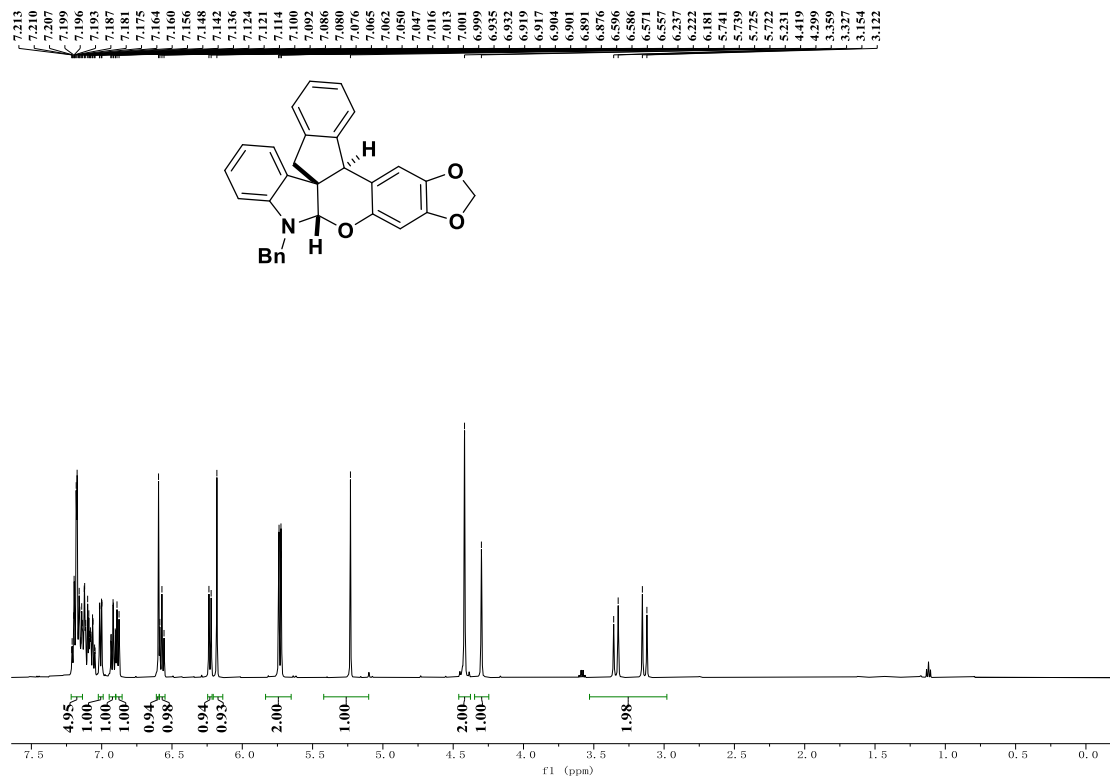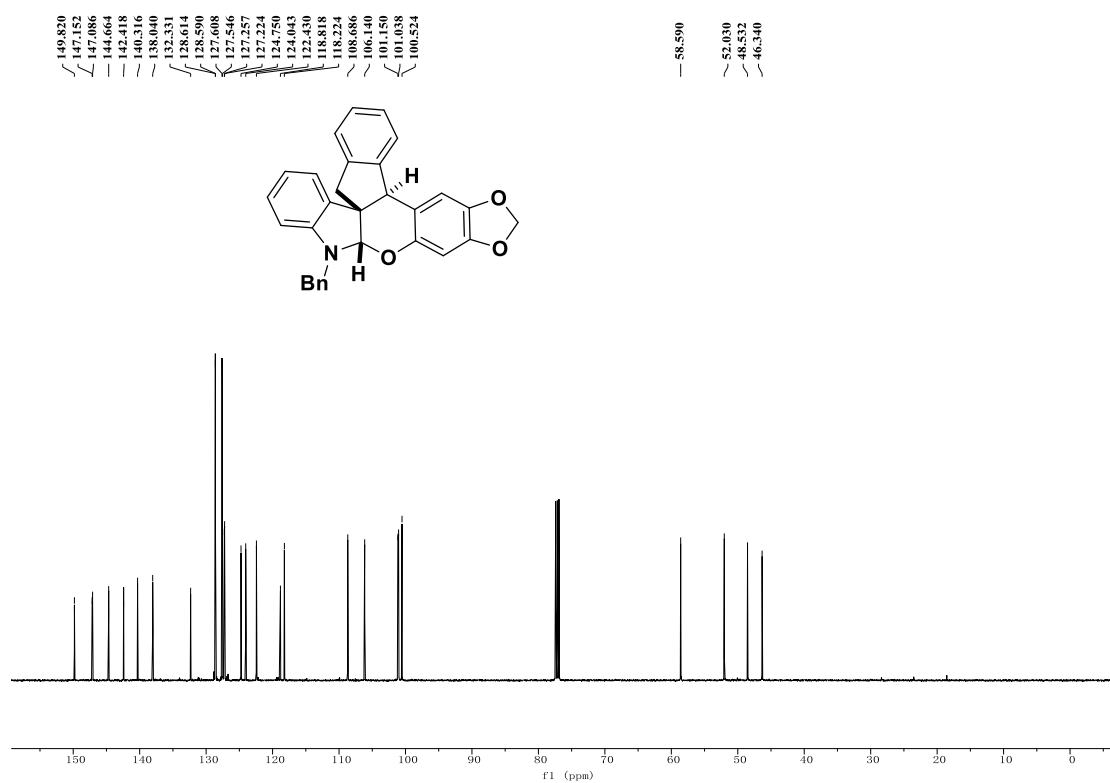

**10-methyl-5,10,10a,16b-tetrahydro-  
[1,3]dioxolo[4',5':6,7]indeno[2',1':3,4]chromeno[2,3-b]indole (5ca)**

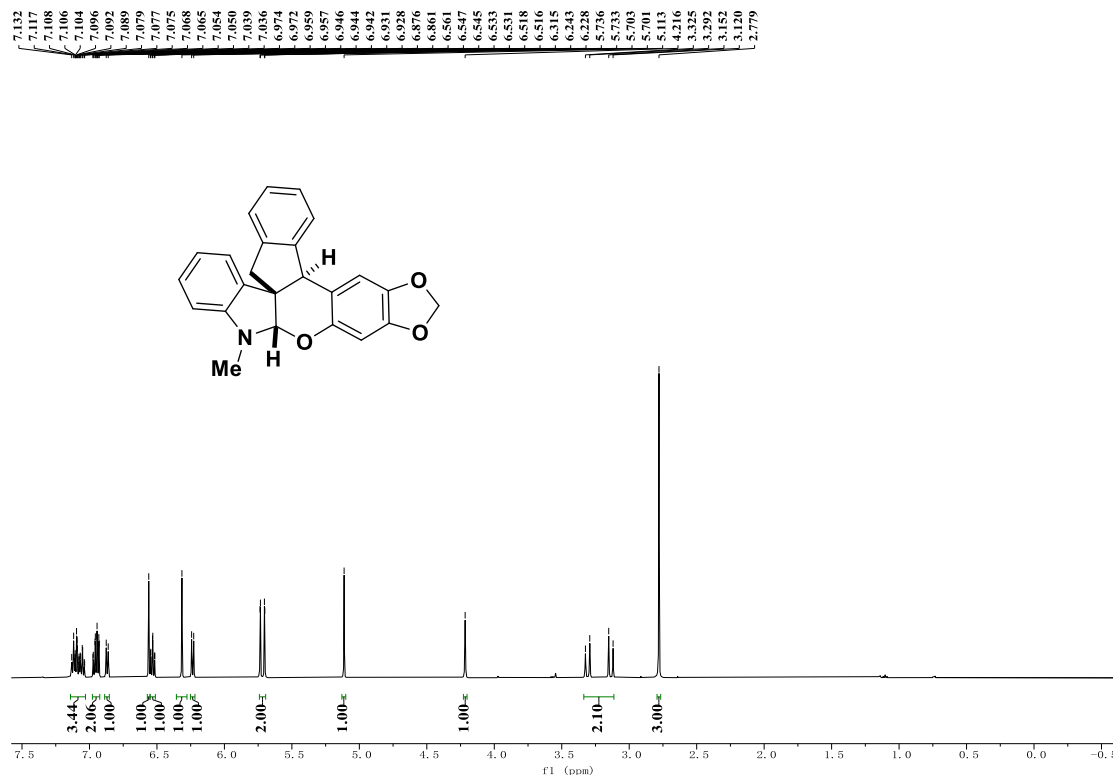

150.206  
147.080  
147.060  
144.619  
142.342  
140.406  
132.464  
128.563  
127.467  
127.179  
124.061  
123.146  
121.158  
118.928  
117.912  
108.641  
105.524  
102.059  
100.993  
100.822

58.241  
52.045  
46.015  
30.901

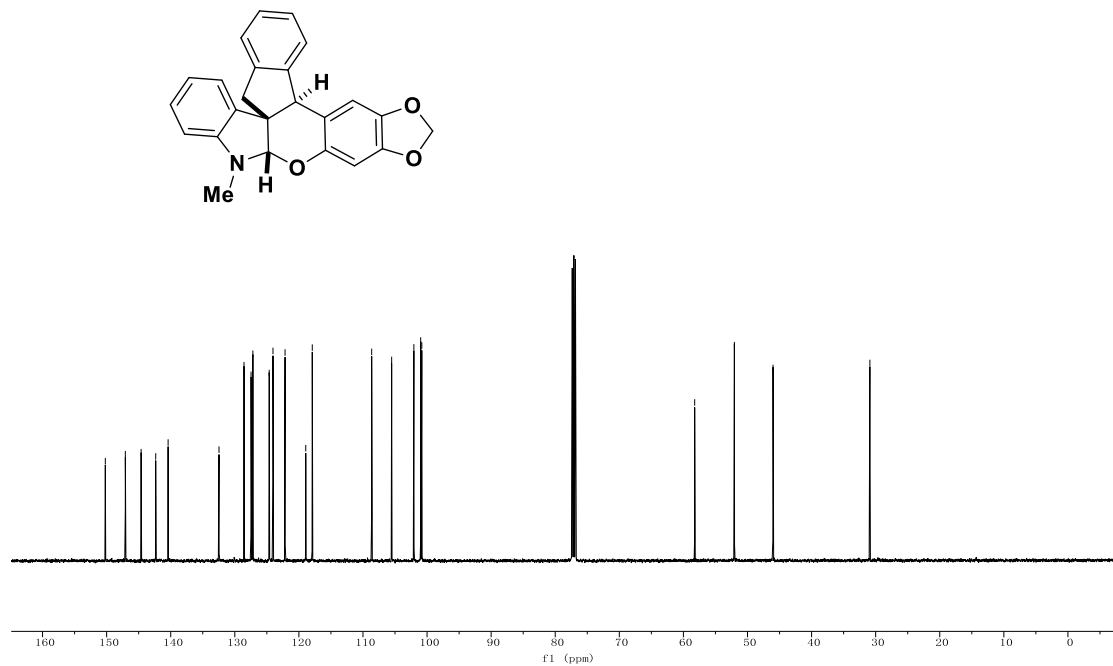

**(5*a*S,10*a*S,16*b*S)-10-allyl-5,10,10*a*,16*b*-tetrahydro-  
[1,3]dioxolo[4',5':6,7]indeno[2',1':3,4]chromeno[2,3-*b*]indole (5*da*)**

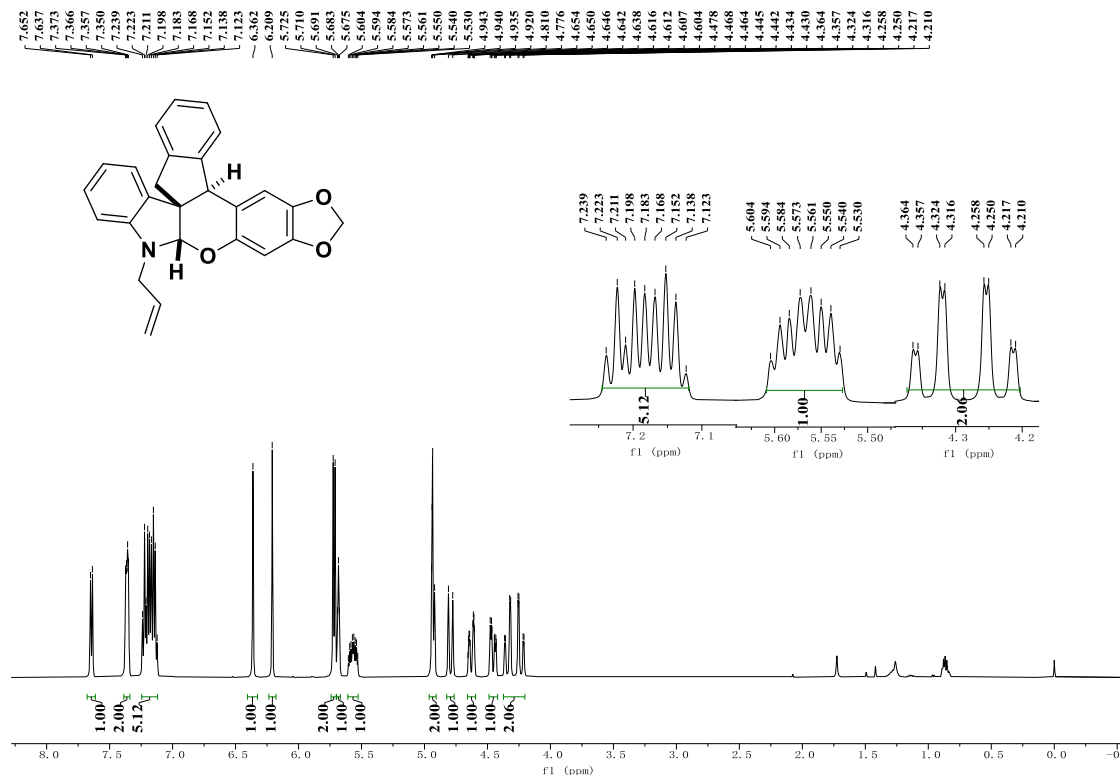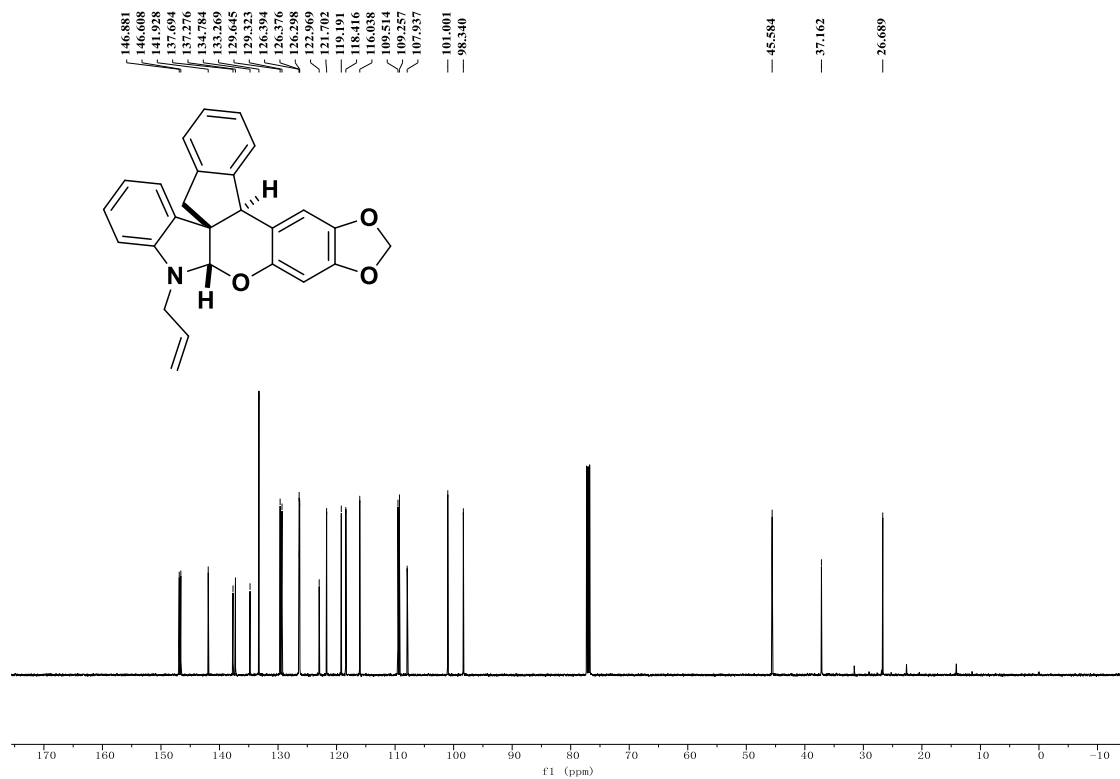





**(5*a*S,10*a*S,16*b*S)-10-benzyl-10*a*-methyl-5,10,10*a*,16*b*-tetrahydro-[1,3]dioxolo[4',5':6,7]indeno[2',1':3,4]chromeno[2,3-*b*]indole (5*fa*)**

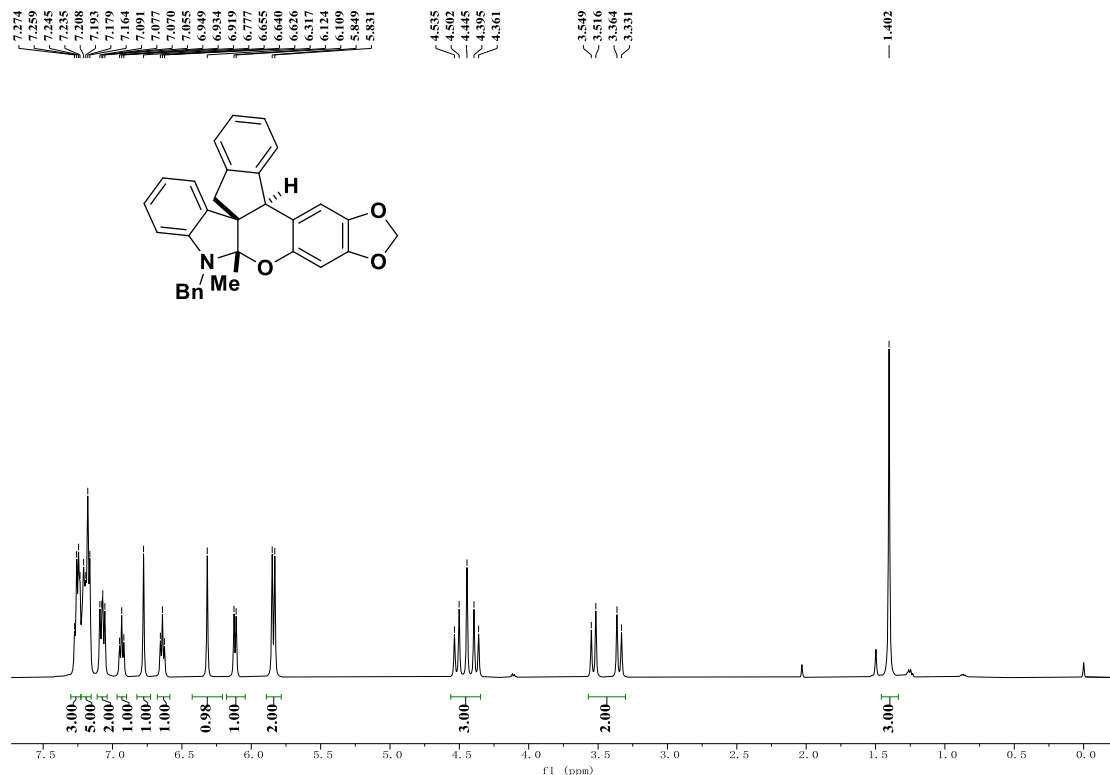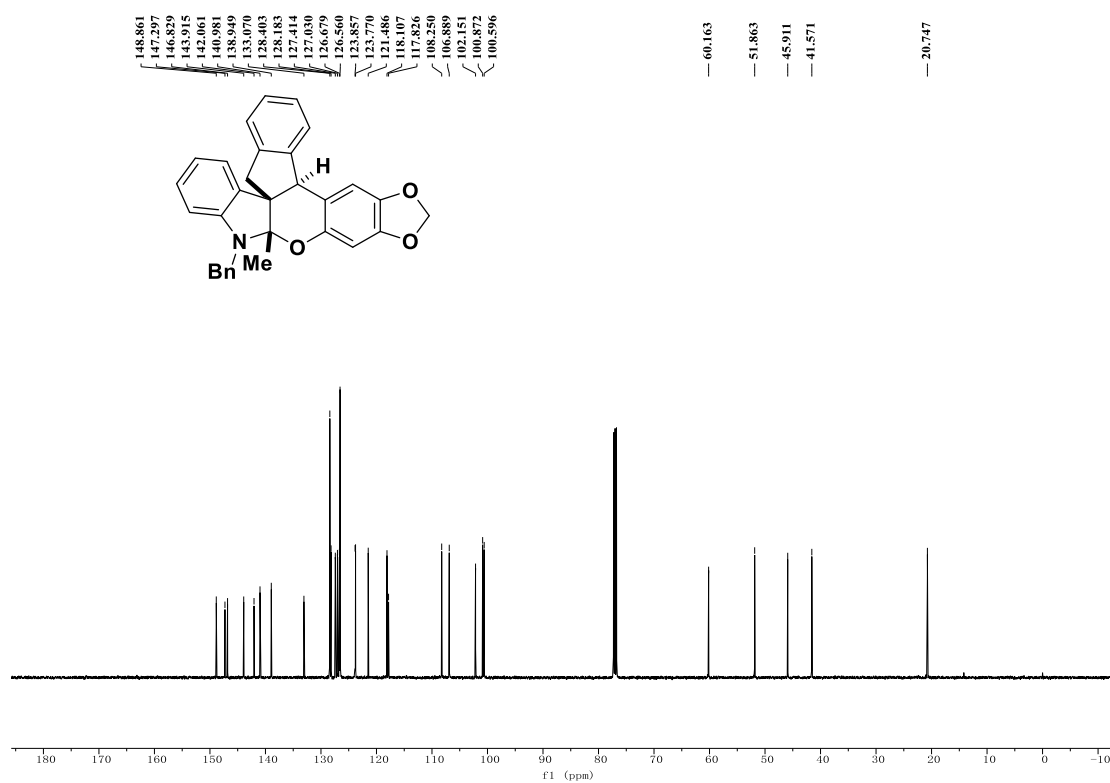

**(5*a*S,10*a*S,16*b*S)-10-benzyl-6-methyl-5,10,10*a*,16*b*-tetrahydro-  
[1,3]dioxolo[4',5':6,7]indeno[2',1':3,4]chromeno[2,3-*b*]indole (5*ga*)**

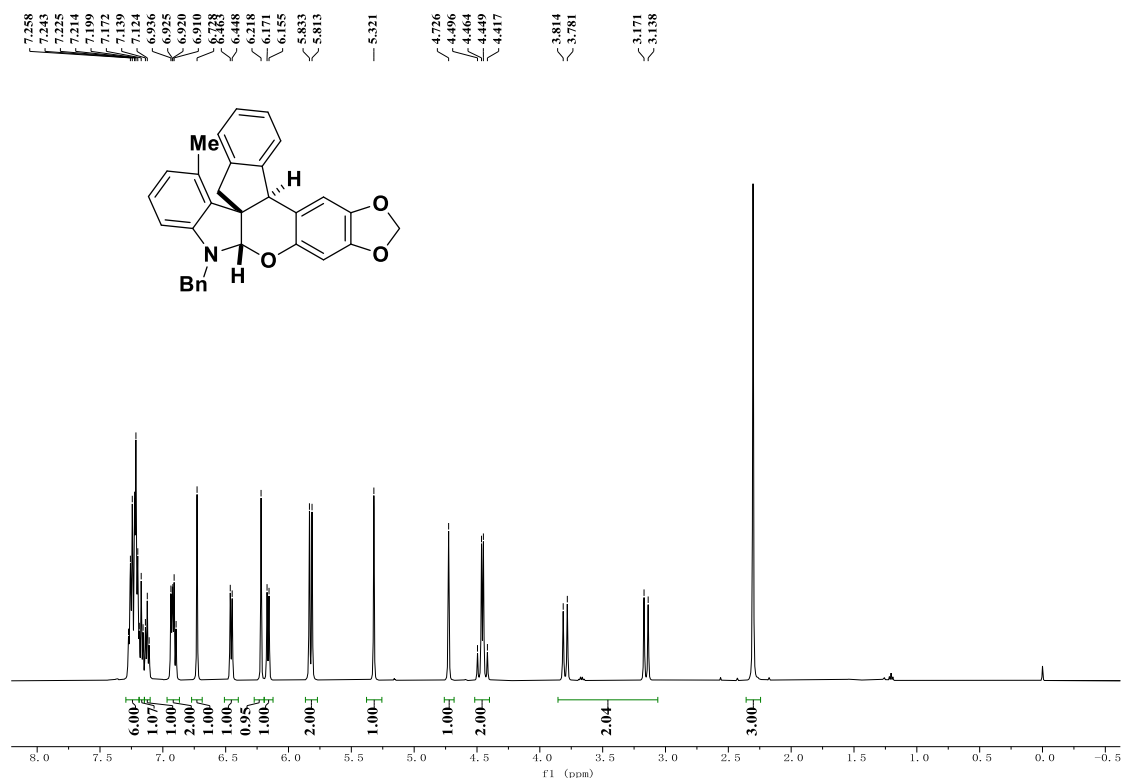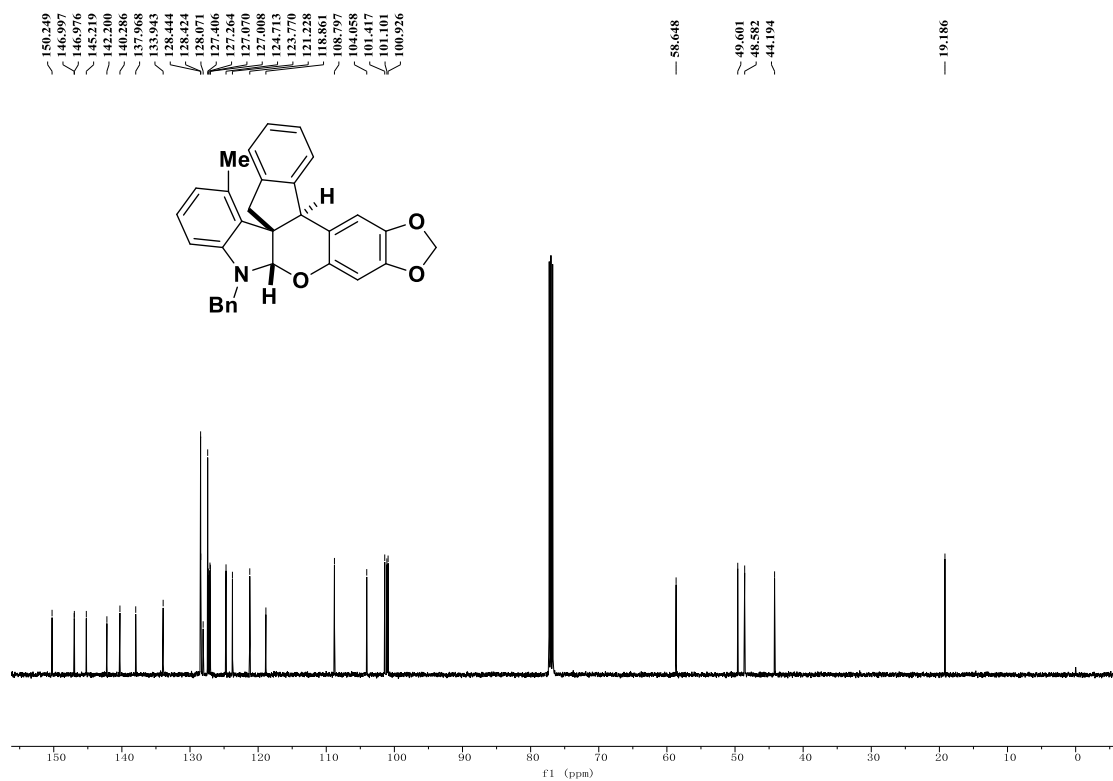

**(5*a*S,10*a*S,16*b*S)-10-benzyl-6-fluoro-5,10,10*a*,16*b*-tetrahydro-  
[1,3]dioxolo[4',5':6,7]indeno[2',1':3,4]chromeno[2,3-*b*]indole (5*h**a*)**

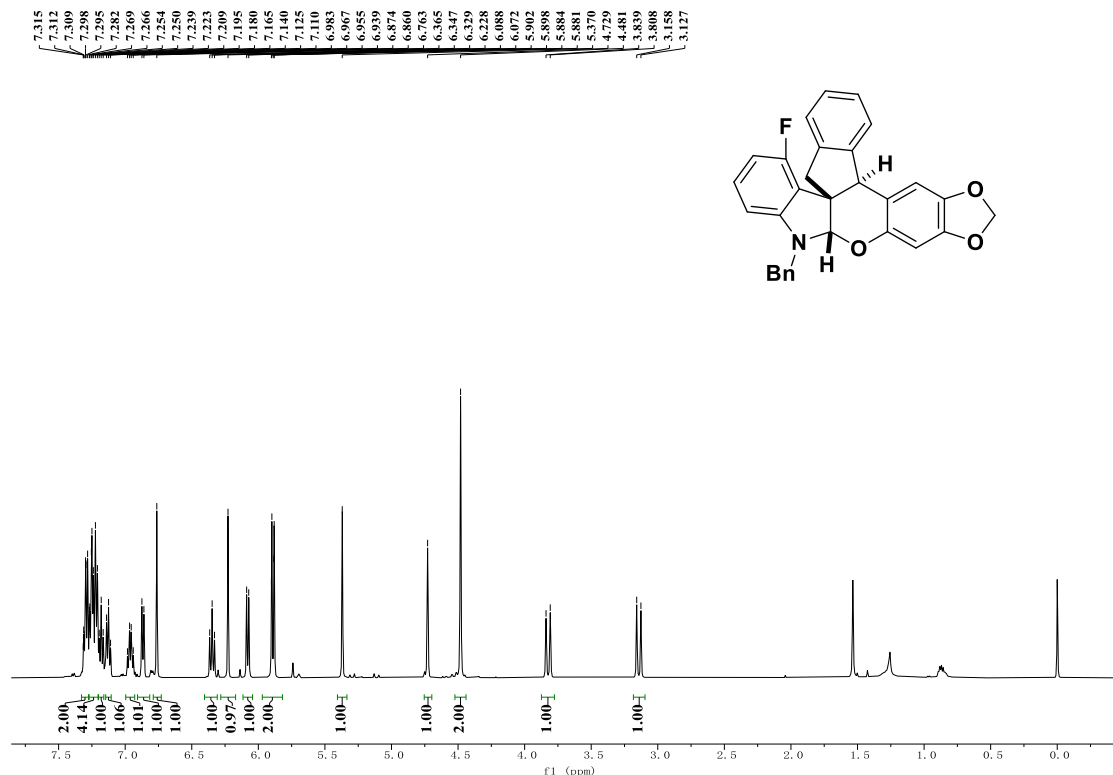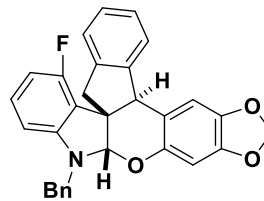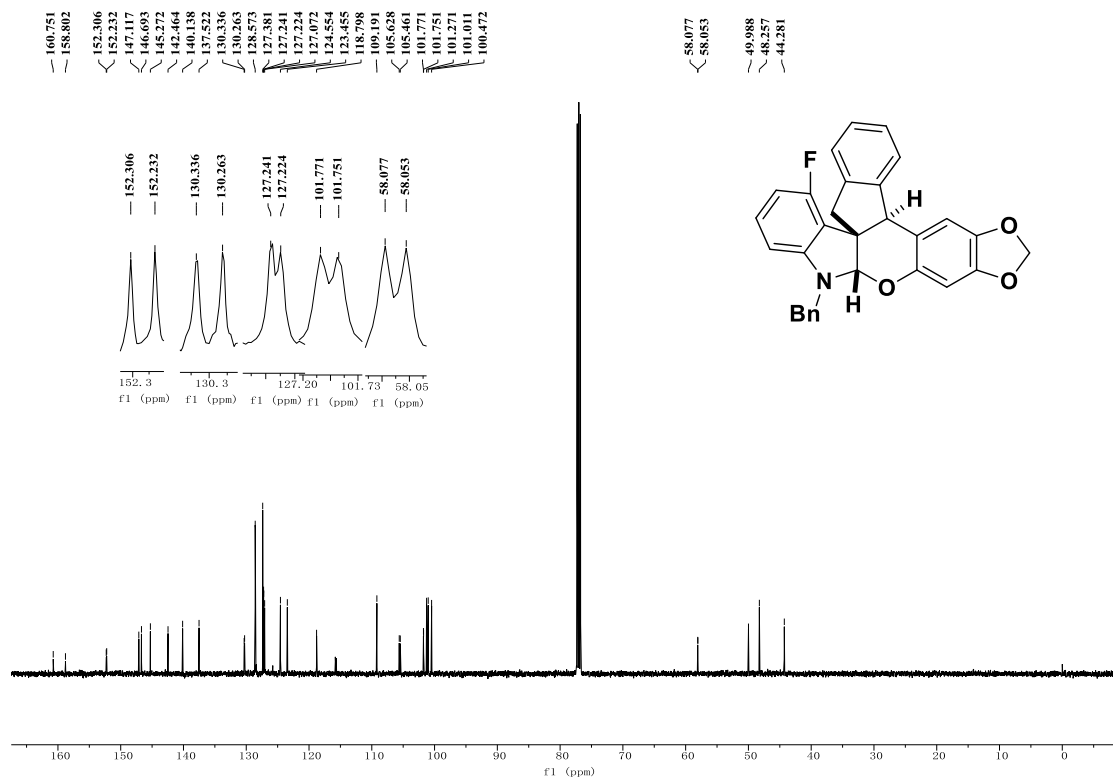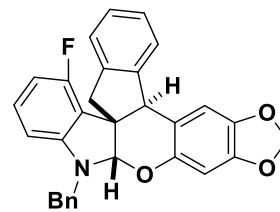

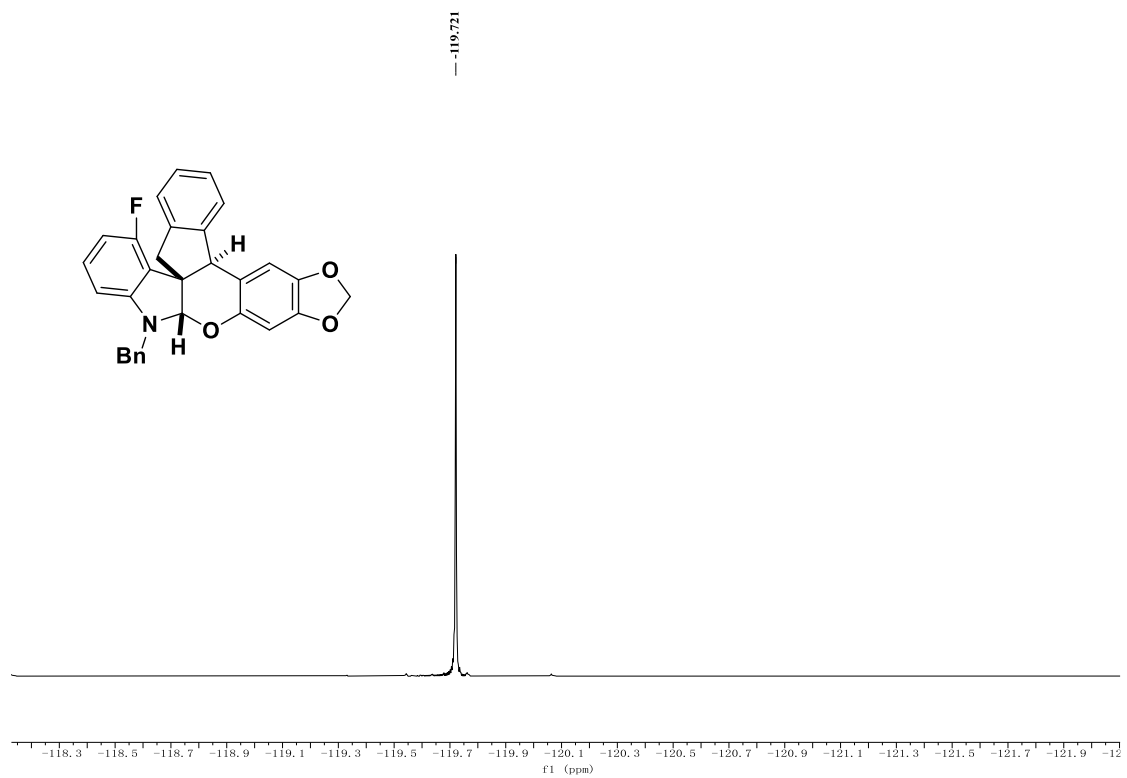



**(5*a*S,10*a*S,16*b*S)-10-benzyl-7-methoxy-5,10,10*a*,16*b*-tetrahydro-[1,3]dioxolo[4',5':6,7]indeno[2',1':3,4]chromeno[2,3-*b*]indole (5*ja*)**

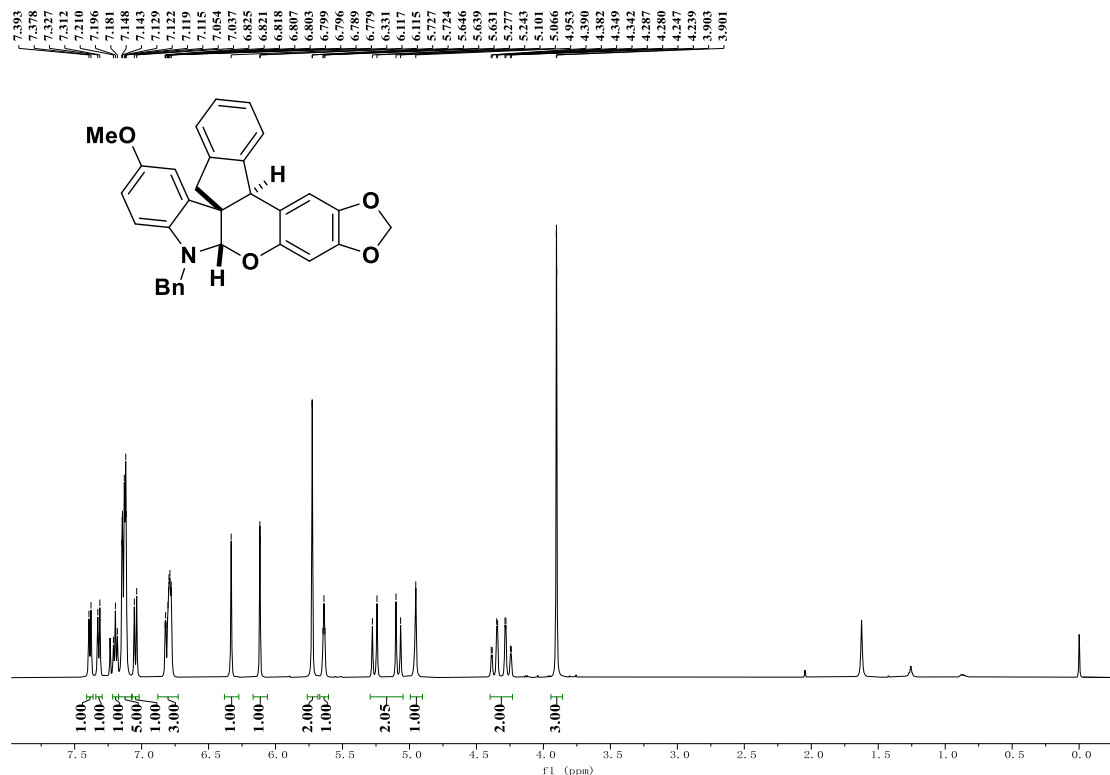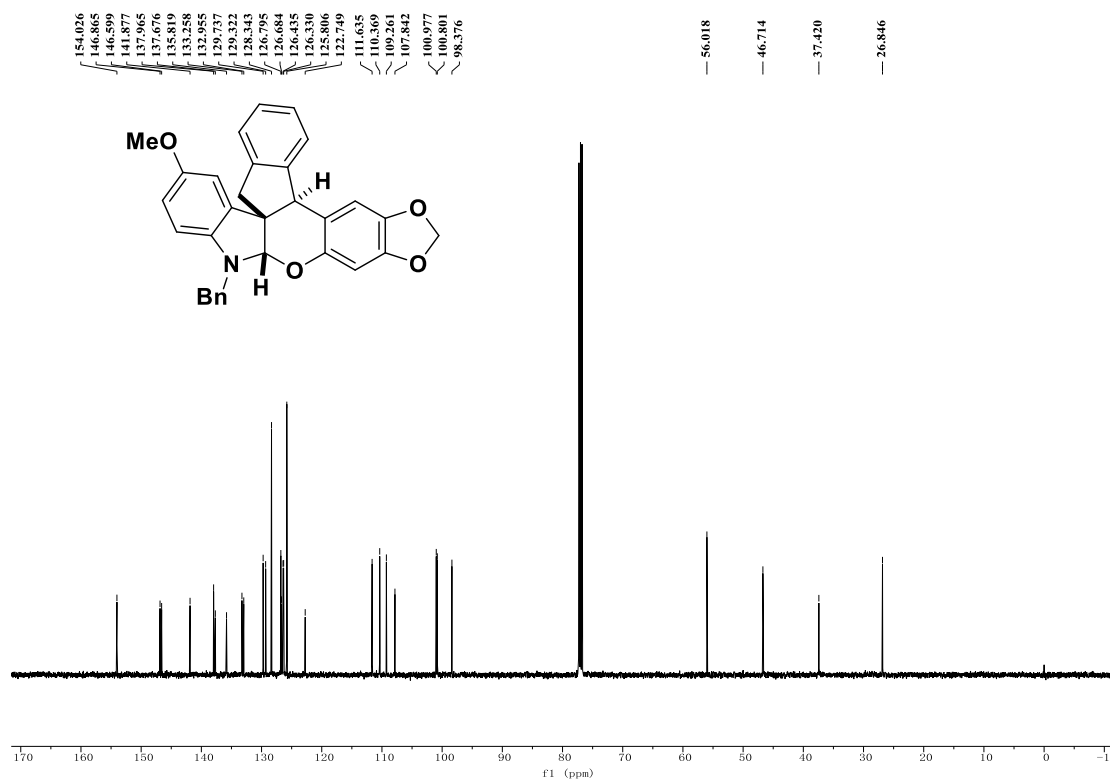

**(5*a*S,10*a*S,16*b*S)-10-benzyl-7-fluoro-5,10,10*a*,16*b*-tetrahydro-  
[1,3]dioxolo[4',5':6,7]indeno[2',1':3,4]chromeno[2,3-*b*]indole (5*ka*)**

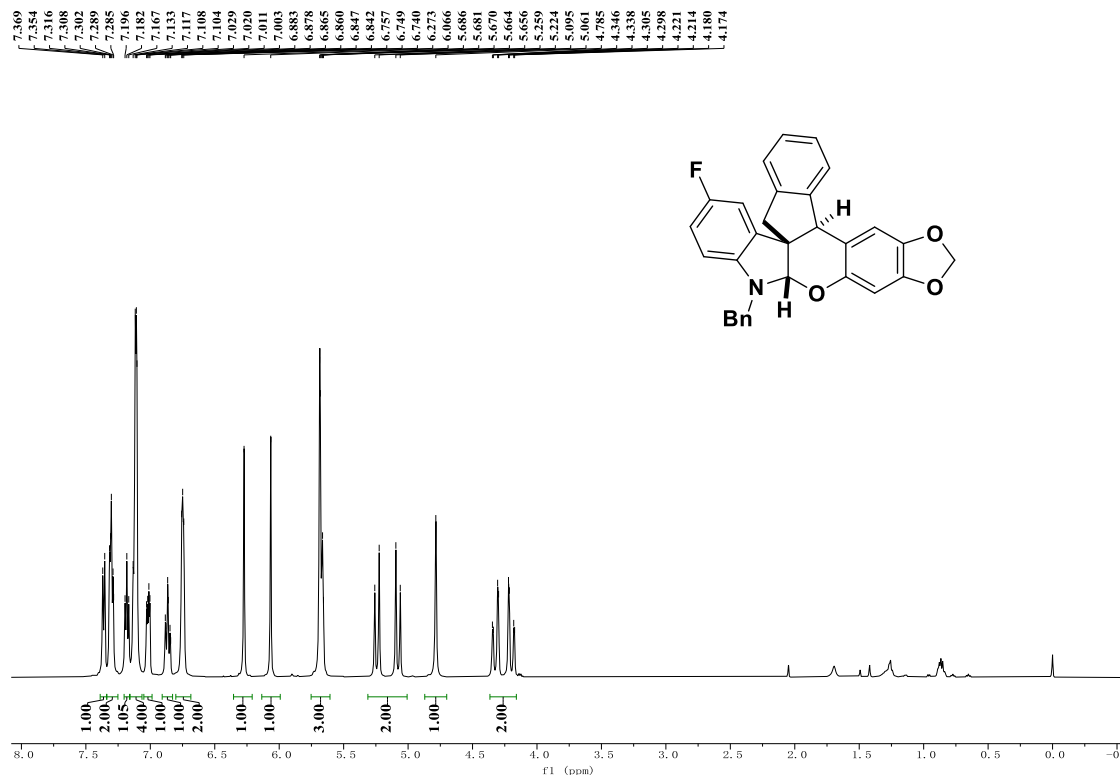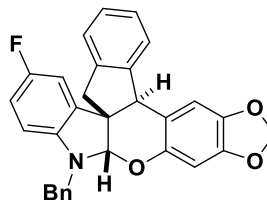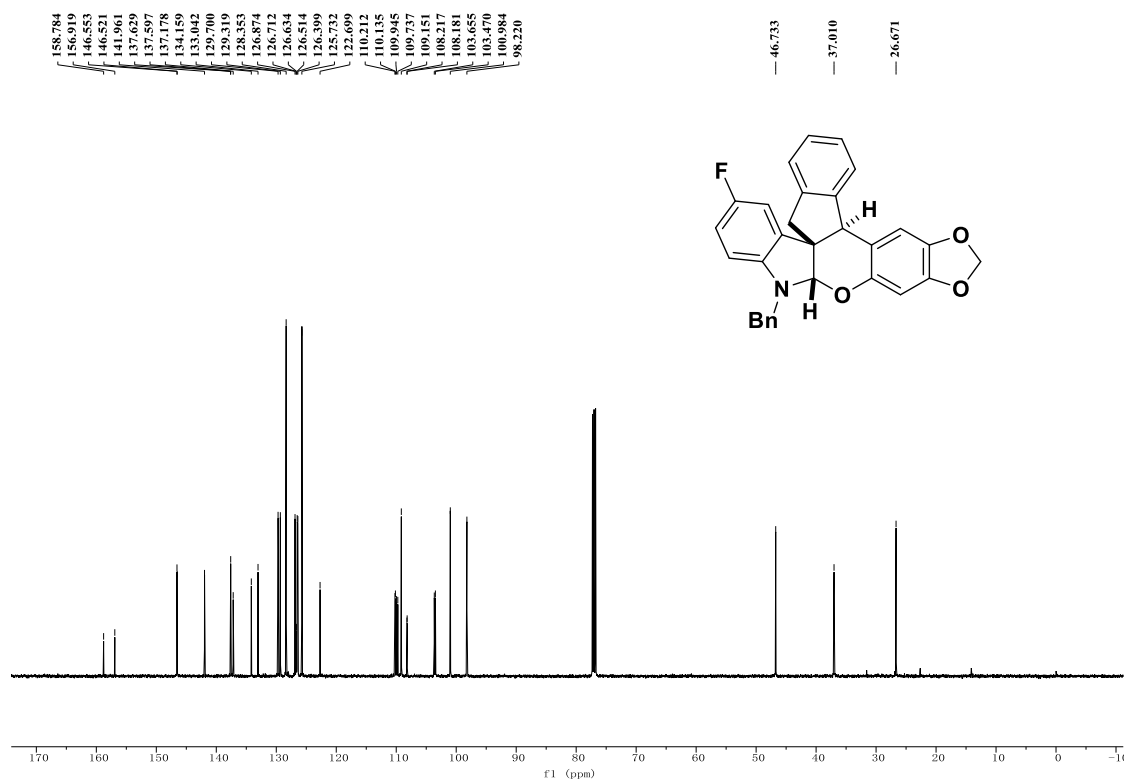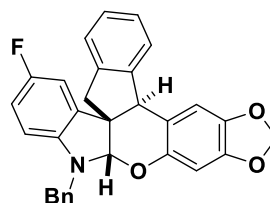



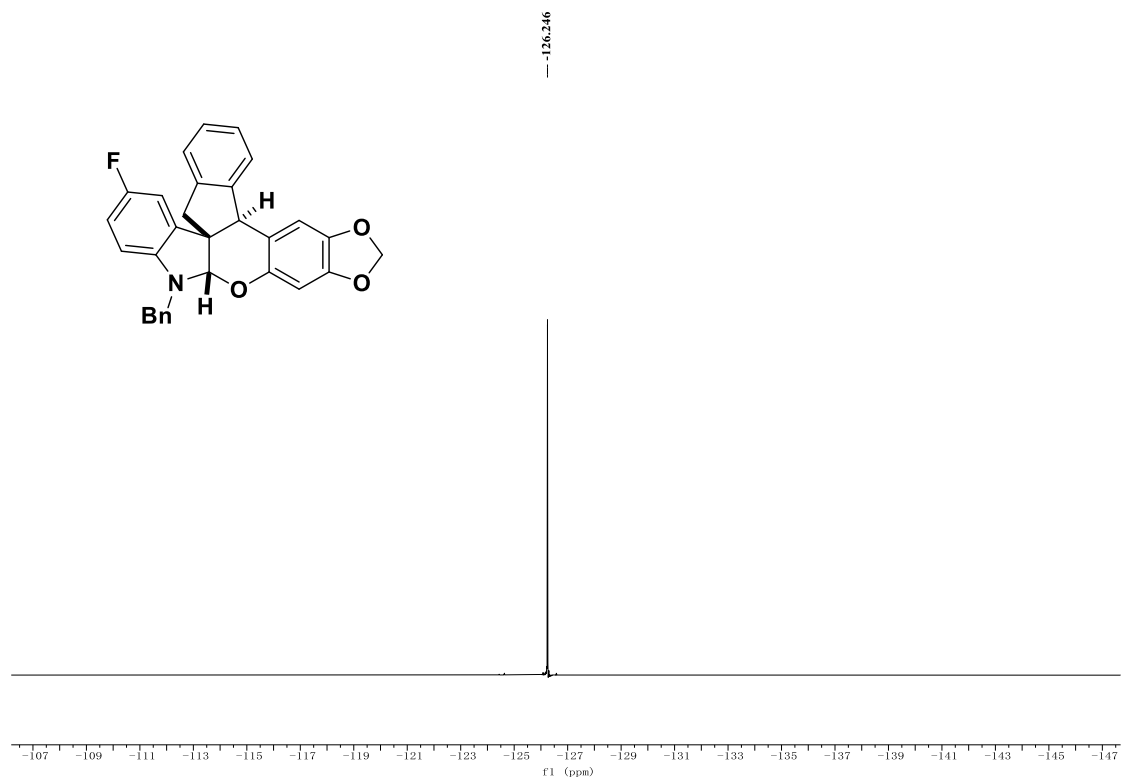

**(5*a*S,10*a*S,16*b*S)-10-benzyl-7-chloro-5,10,10*a*,16*b*-tetrahydro-  
[1,3]dioxolo[4',5':6,7]indeno[2',1':3,4]chromeno[2,3-*b*]indole (51a)**

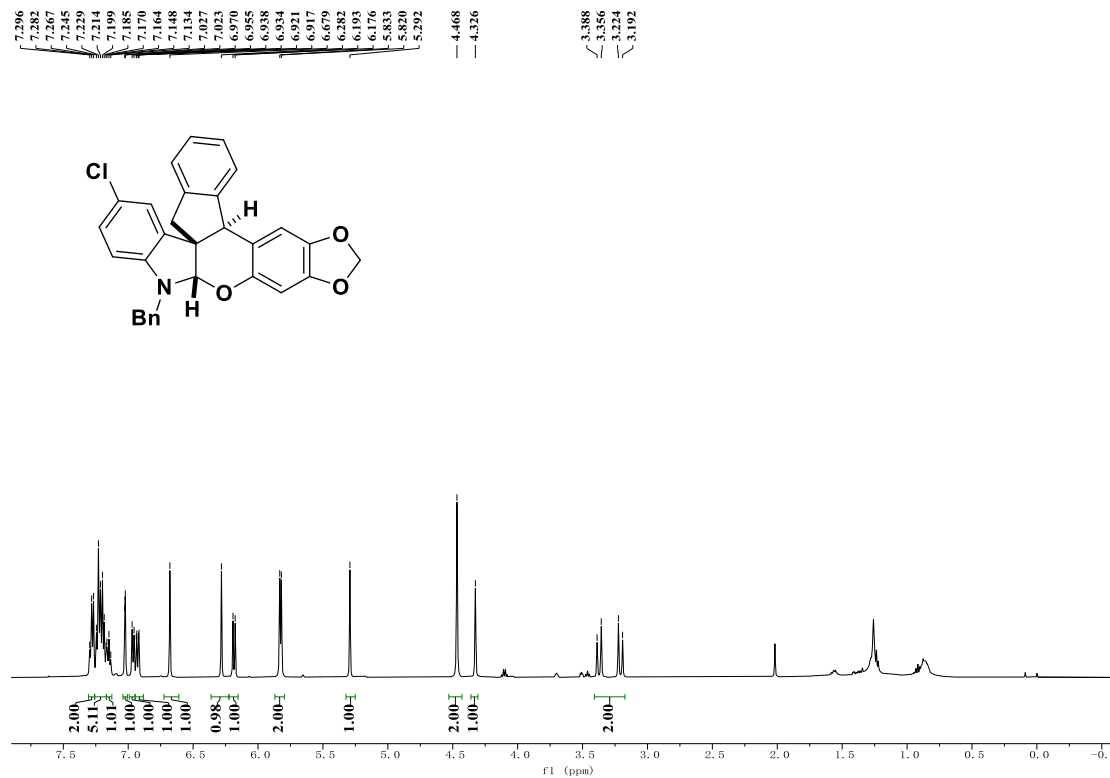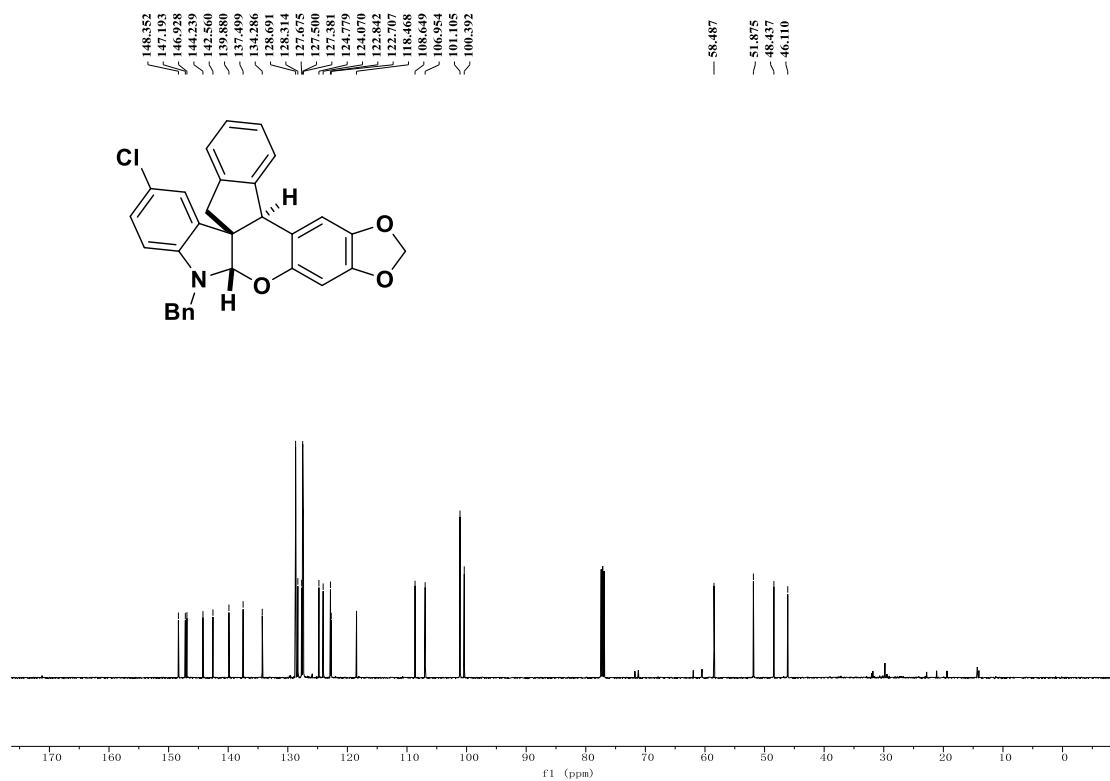

**(5*a*S,10*a*S,16*b*S)-10-benzyl-8-methoxy-5,10,10*a*,16*b*-tetrahydro-  
[1,3]dioxolo[4',5':6,7]indeno[2',1':3,4]chromeno[2,3-*b*]indole (5*ma*)**

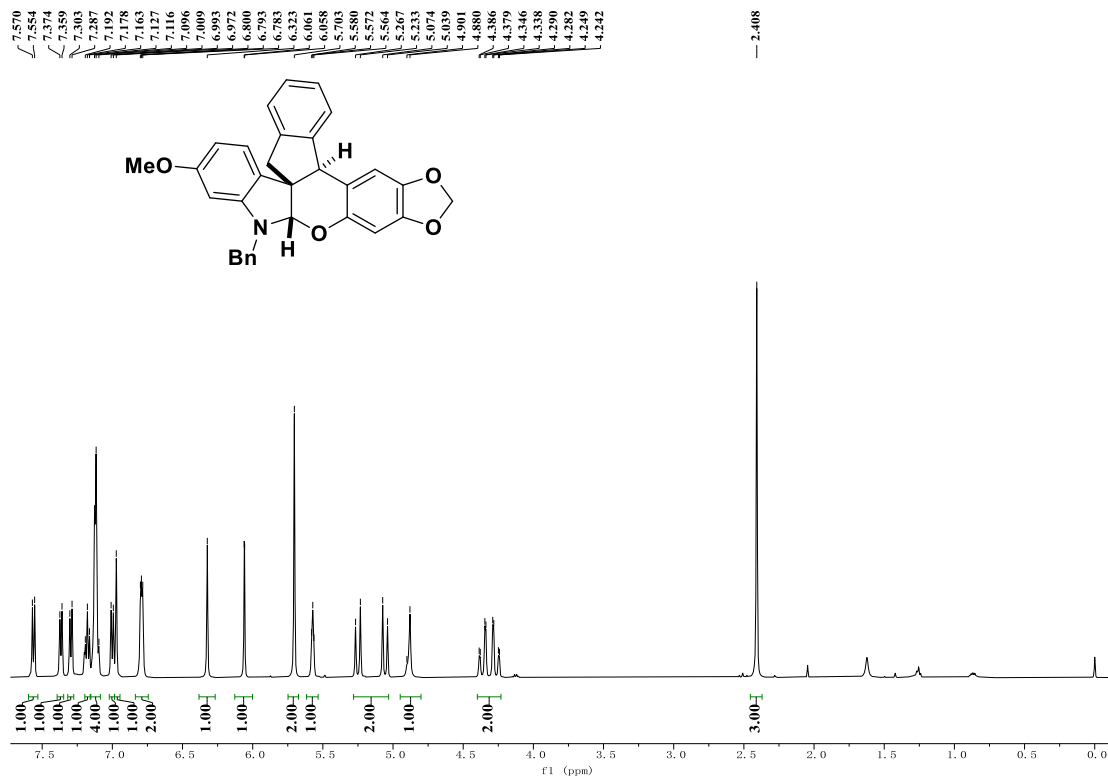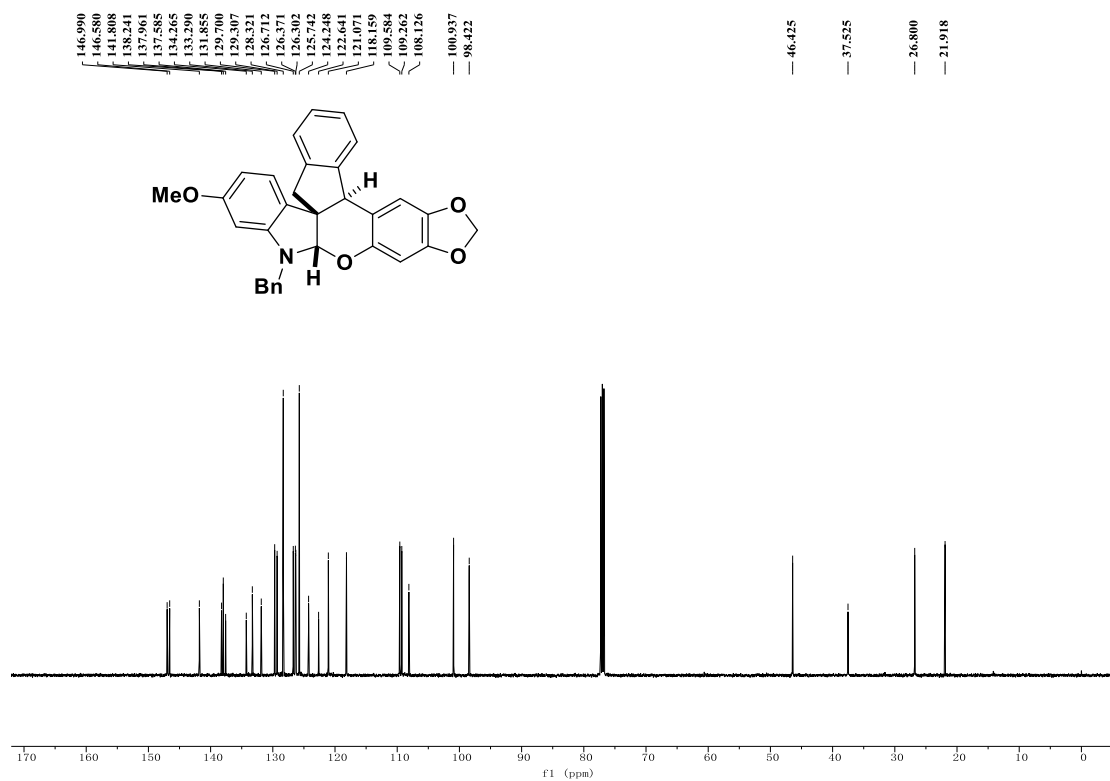

**(5*a*S,10*a*S,16*b*S)-10-benzyl-8-fluoro-5,10,10*a*,16*b*-tetrahydro-[1,3]dioxolo[4',5':6,7]indeno[2',1':3,4]chromeno[2,3-*b*]indole (5*na*)**

7.330  
7.326  
7.316  
7.313  
7.300  
7.282  
7.279  
7.267  
7.258  
7.255  
7.245  
7.224  
7.209  
7.194  
7.185  
7.170  
7.156  
7.010  
7.007  
6.999  
6.994  
6.991  
6.983  
6.980  
6.968  
6.954  
6.698  
6.695  
6.639  
6.635  
6.632  
6.620  
6.316  
6.304  
6.300  
6.296  
6.288  
6.285  
6.317  
6.313  
6.030  
6.017  
6.013  
6.010  
5.896  
5.892  
5.888  
5.885  
5.348  
5.345  
4.489  
4.484  
4.349  
3.436  
3.404  
3.234  
3.202

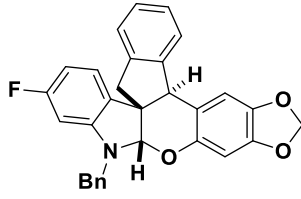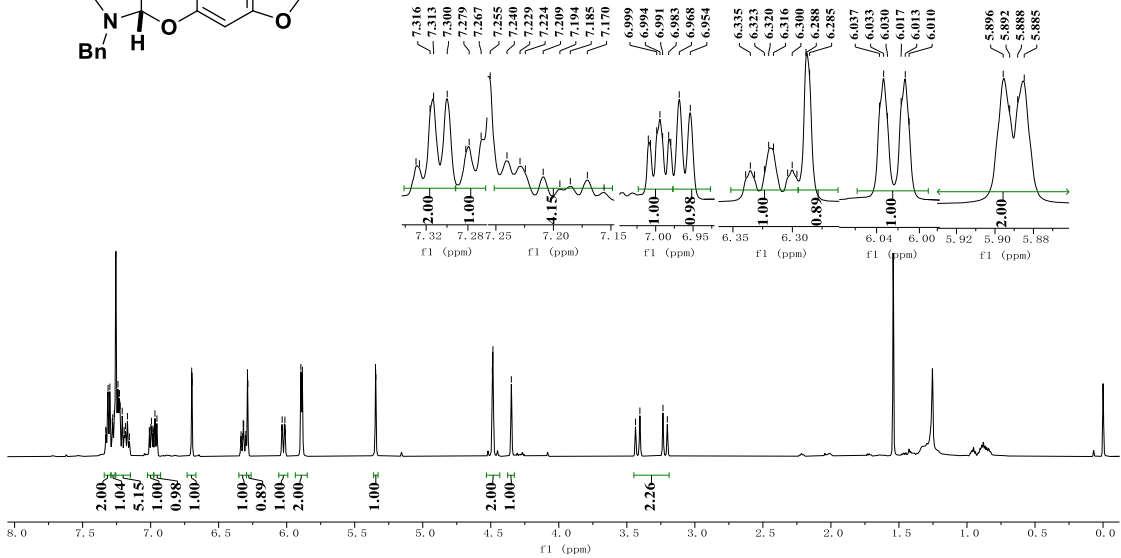

164.945  
163.017  
151.294  
151.197  
147.099  
146.802  
144.389  
142.505  
140.000  
137.245  
128.657  
127.542  
127.468  
127.362  
127.260  
124.673  
123.902  
122.967  
122.881  
118.696  
108.638  
103.943  
103.760  
101.114  
101.049  
100.663  
94.410  
94.190  
58.127  
52.177  
48.222  
46.324

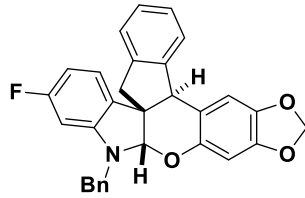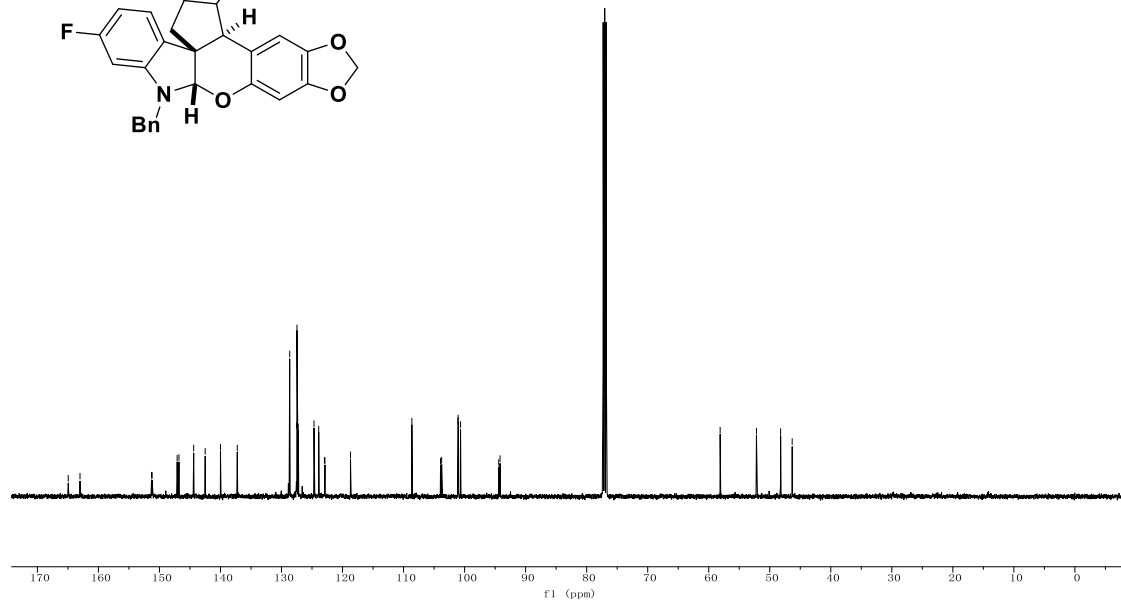

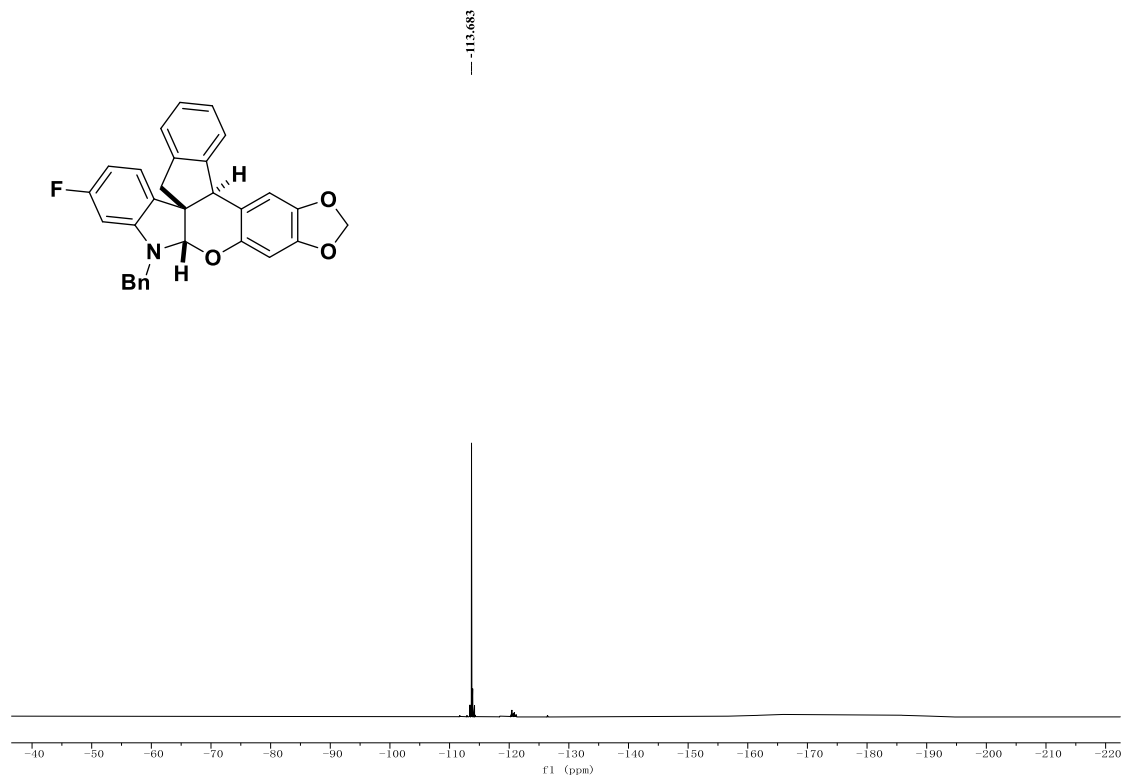

**(5*b*S,5*b*1*S*,15*b*S)-5*b*,5*b*1,10,15*b*-tetrahydro-3*H*-  
dibenzo[*b*,*f*]pyrrolo[2',3':7,8]chromeno[4,3,2-*h*]indolizine (6*ab*)**

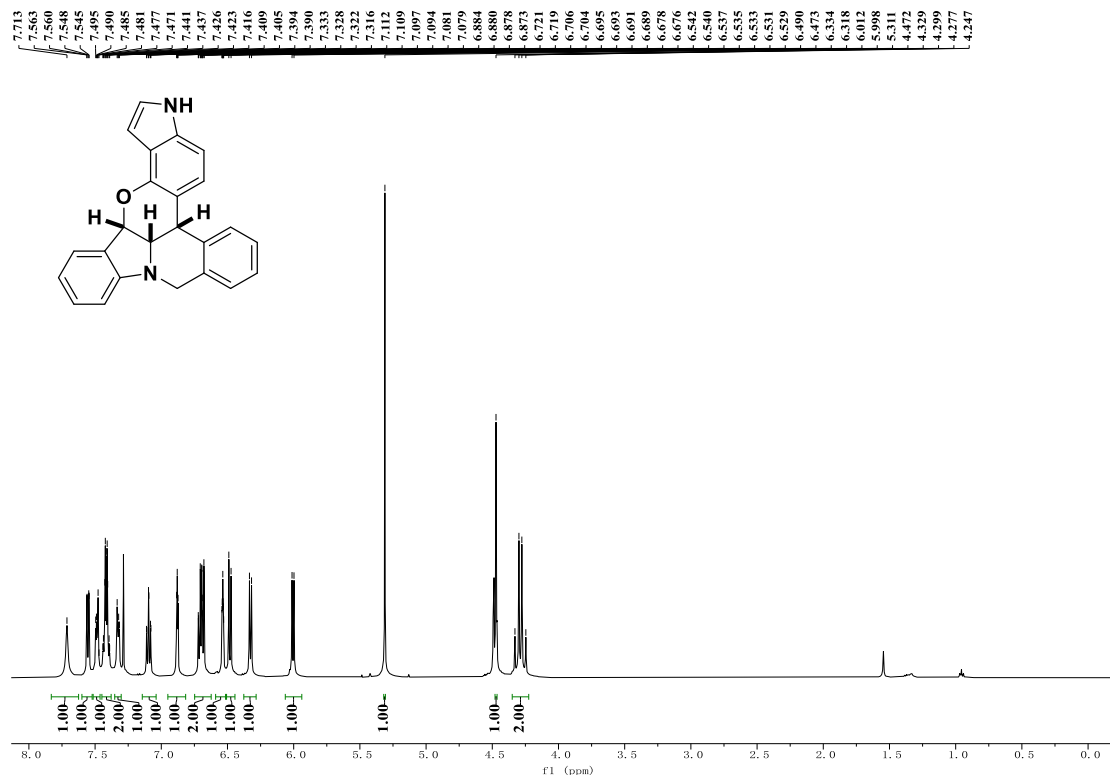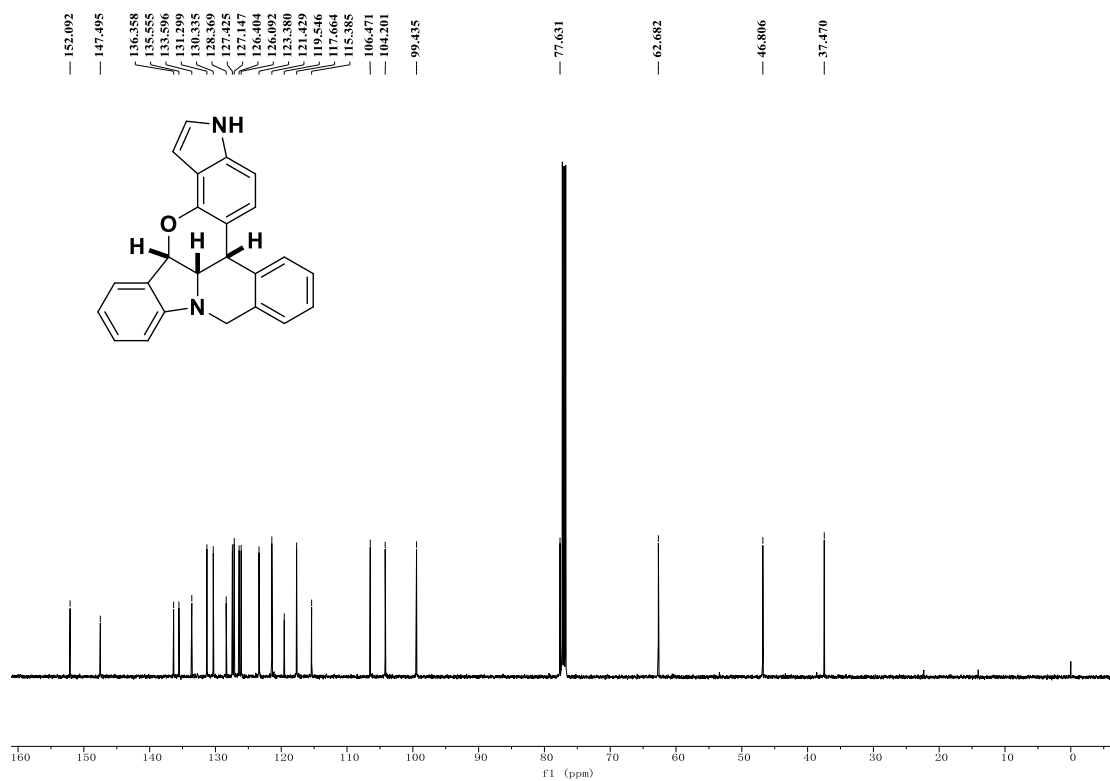

**(5*b*S,5*b*1*S*,15*b*S)-15-methyl-5*b*,5*b*1,10,15*b*-tetrahydro-3*H*-  
dibenzo[*b*,*f*]pyrrolo[2',3':7,8]chromenof[4,3,2-*h*]indolizine (6*bb*)**

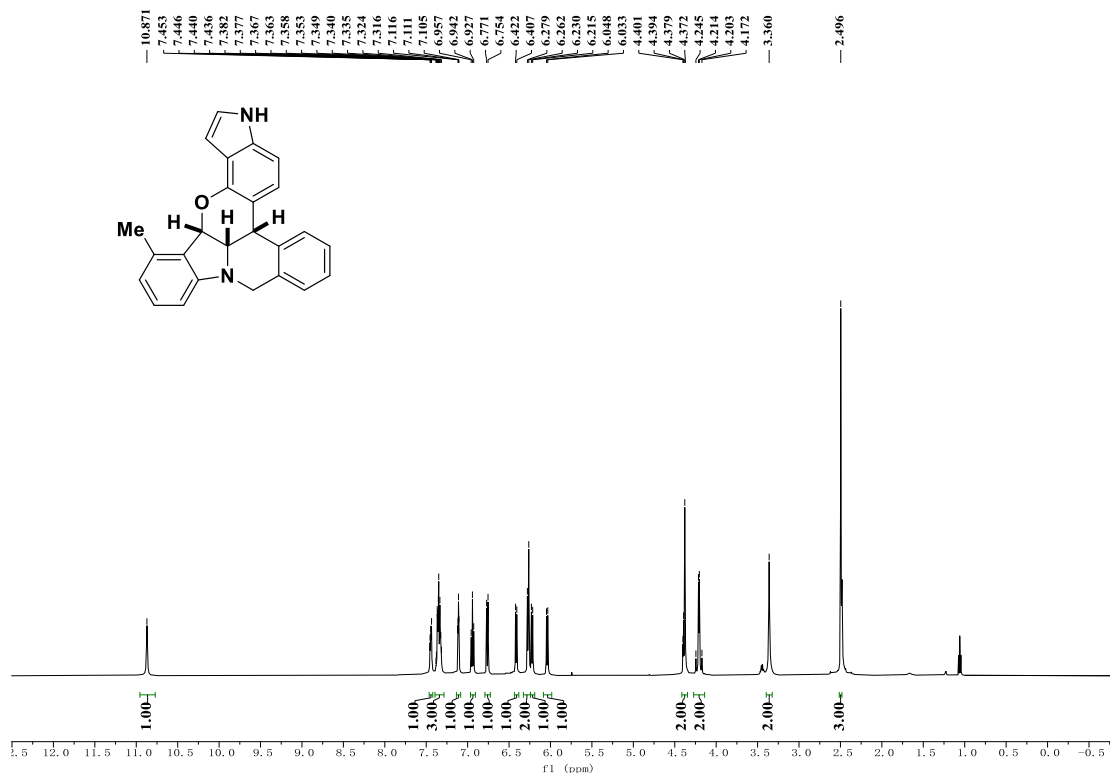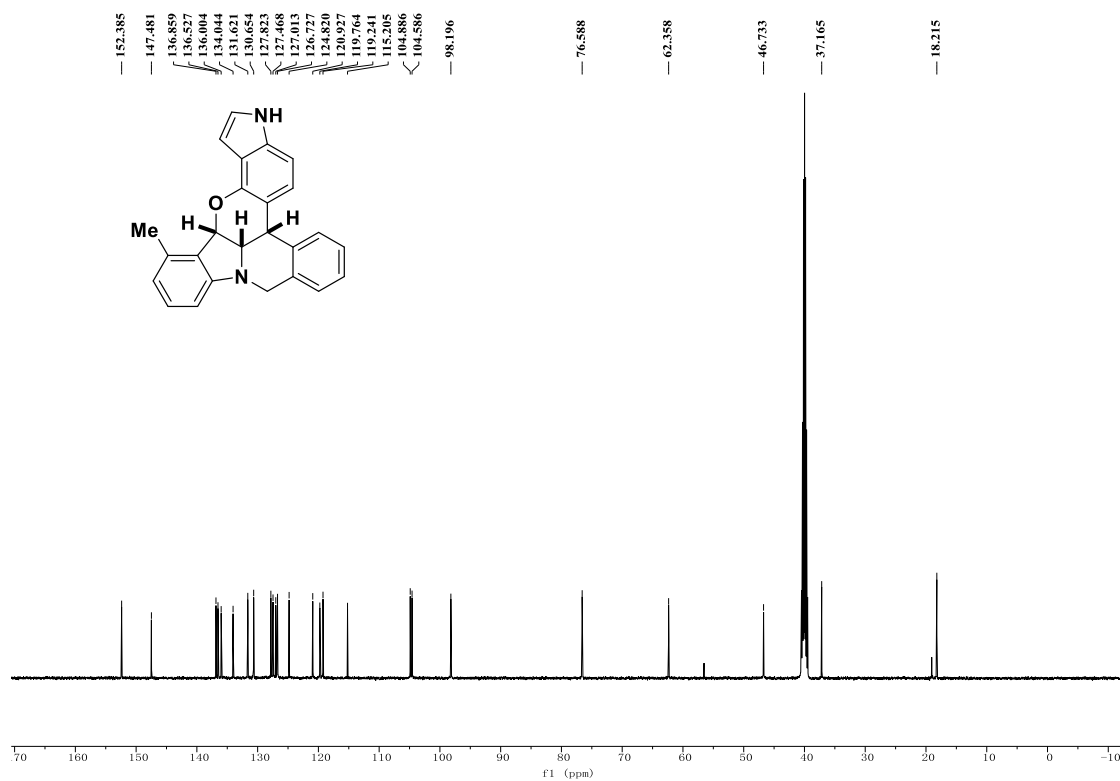

**(5*b*S,5*b*1*S*,15*b*S)-15-fluoro-5*b*,5*b*1,10,15*b*-tetrahydro-3*H*-  
dibenzo[*b*,*f*]pyrrolo[2',3':7,8]chromeno[4,3,2-*h*]indolizine (6*cb*)**

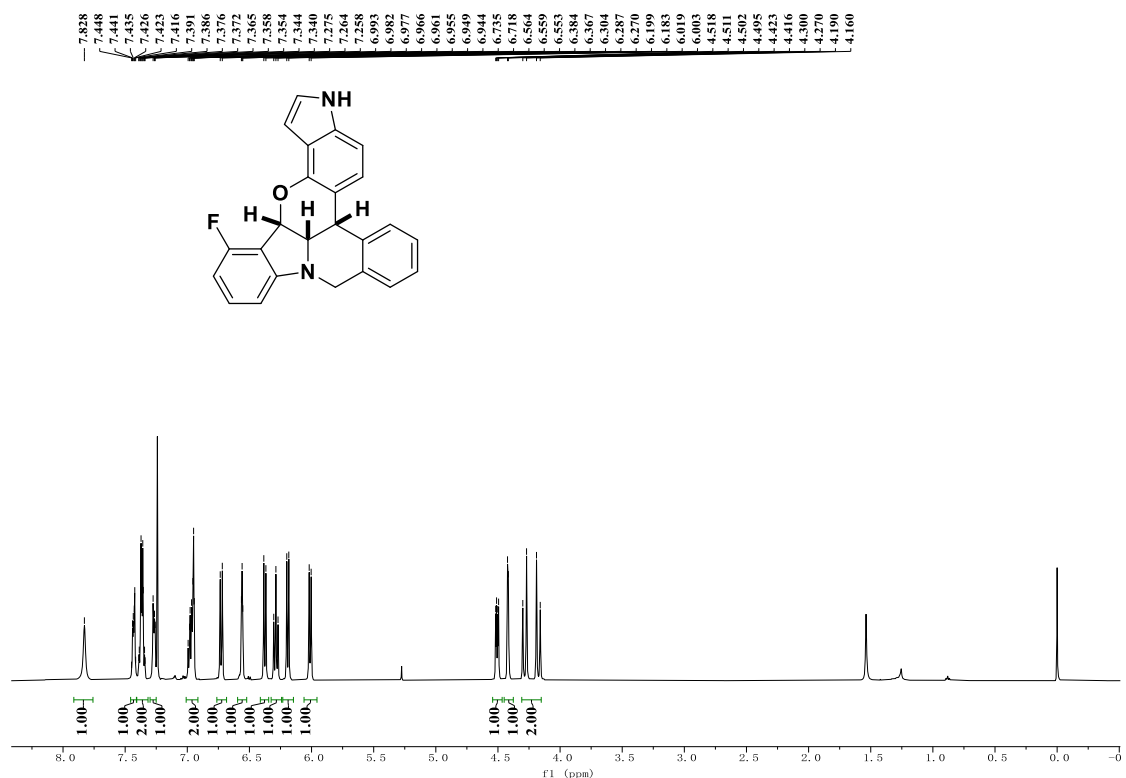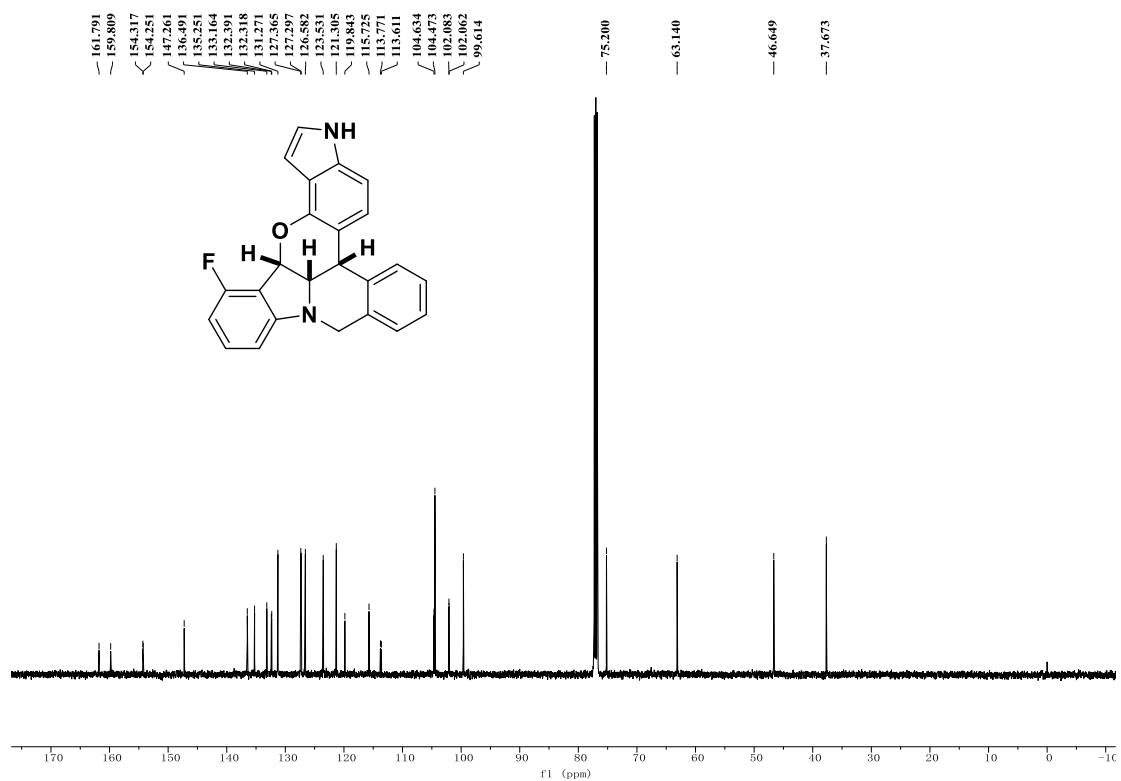



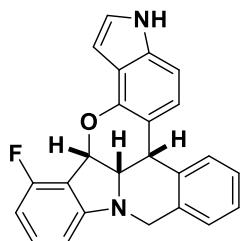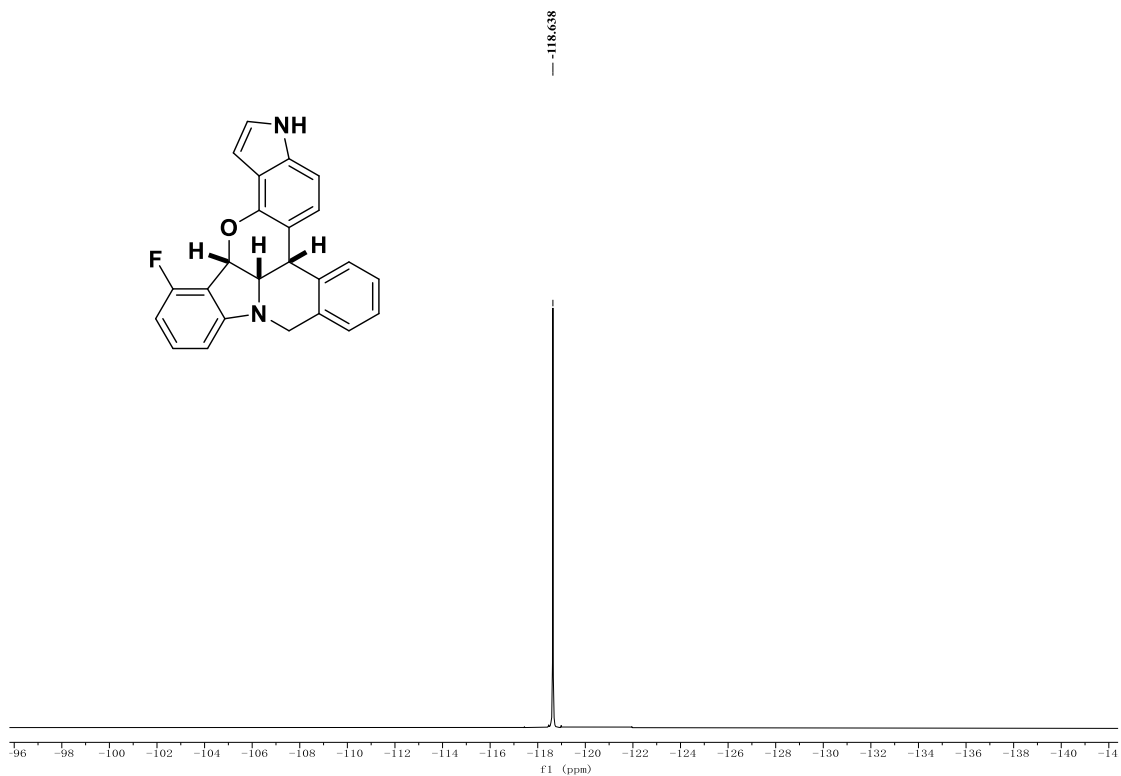

*(5bS,5b1S,15bS)-15-chloro-5b,5b1,10,15b-tetrahydro-3H-dibenzo[b,f]pyrrolo[2',3':7,8]chromeno[4,3,2-hi]indolizine (6db)*

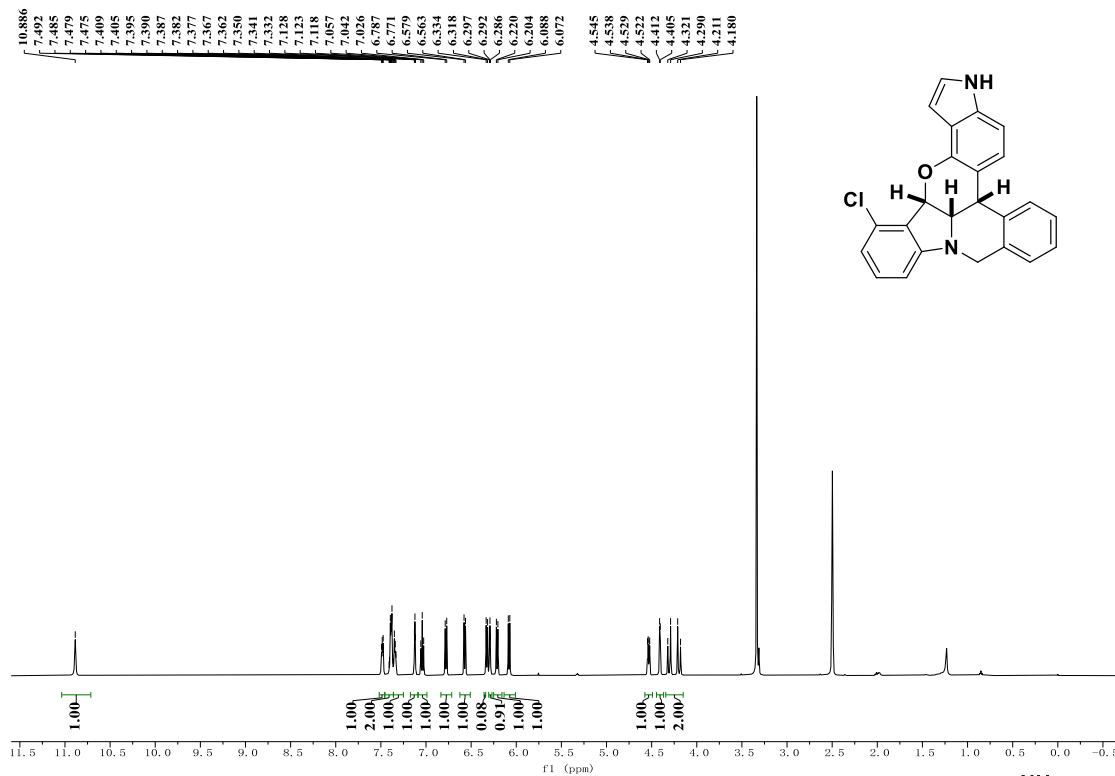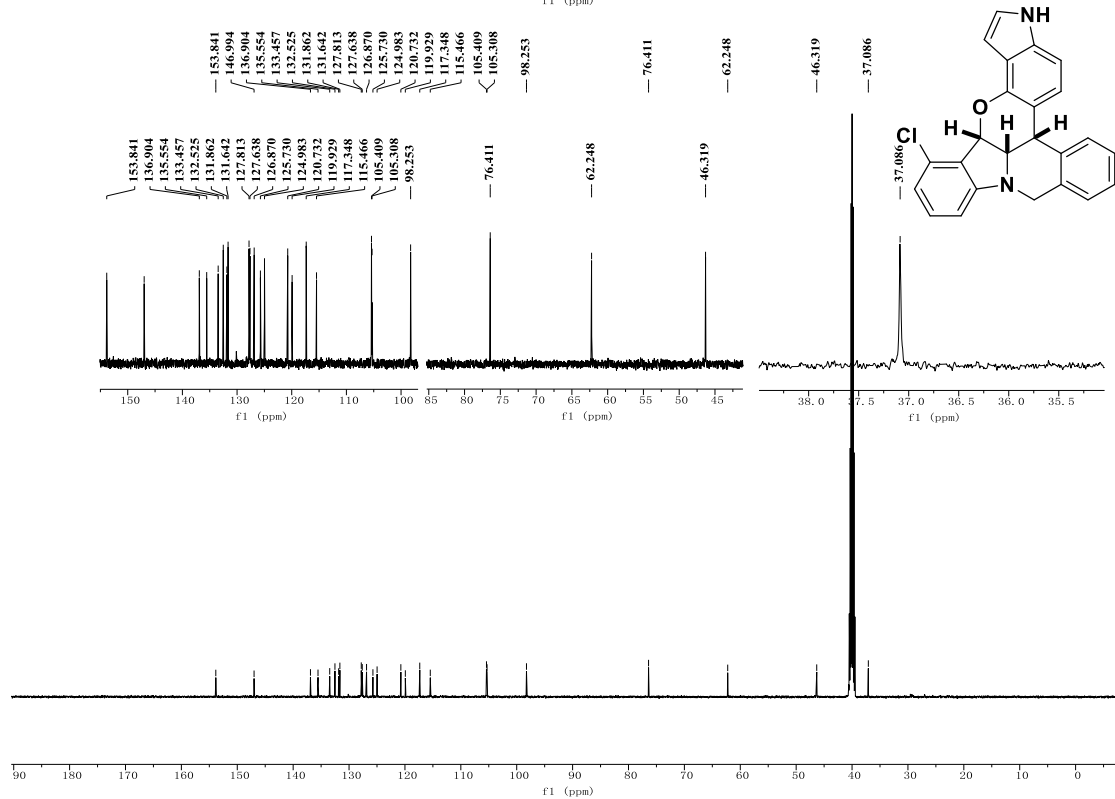



**(5*b*S,5*b*1*S*,15*b*S)-14-methoxy-5*b*,5*b*1,10,15*b*-tetrahydro-3*H*-  
dibenzo[*b*,*f*]pyrrolo[2',3':7,8]chromeno[4,3,2-*h*]indolizine (6*fb*)**

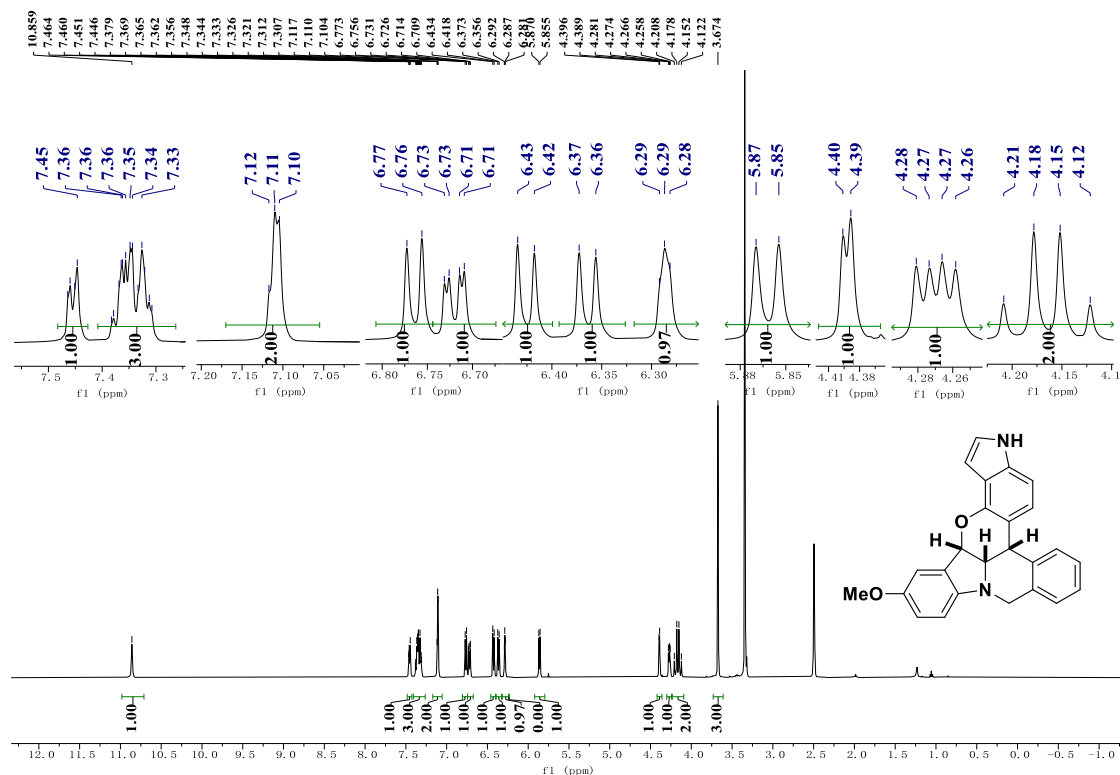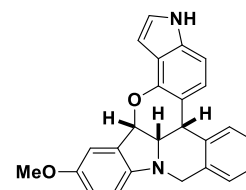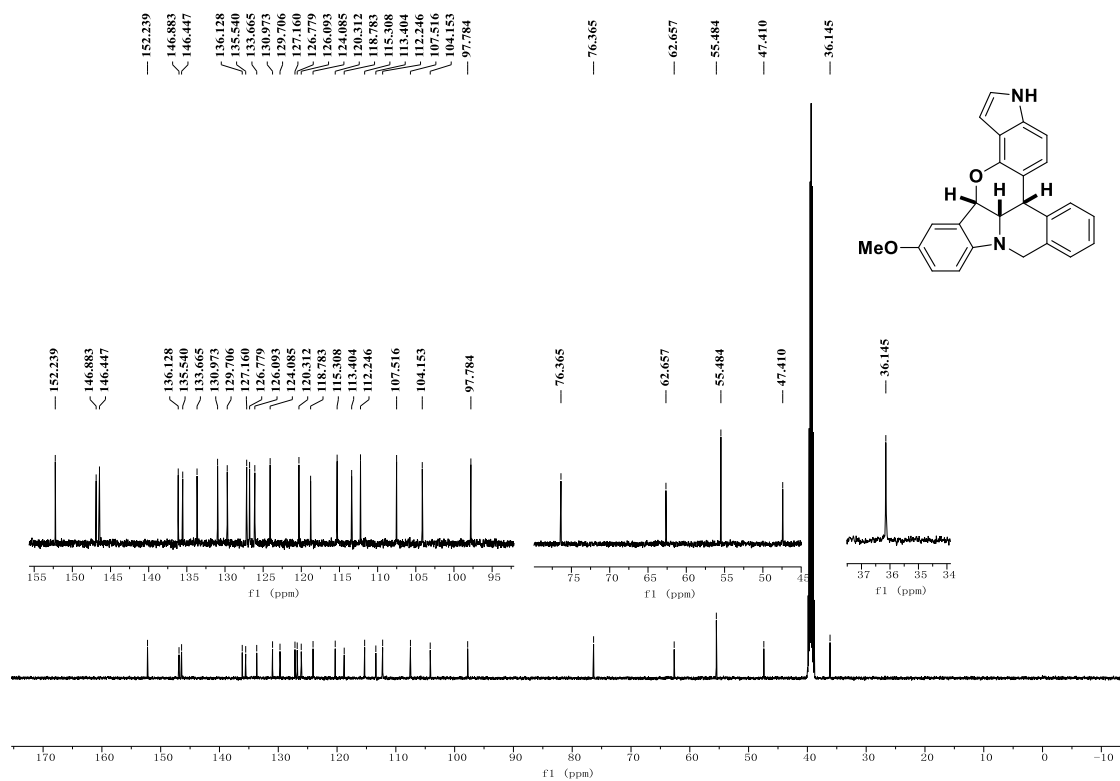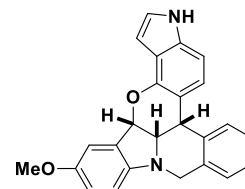

**(5*b*S,5*b*1*S*,15*b*S)-14-fluoro-5*b*,5*b*1,10,15*b*-tetrahydro-3*H*-  
dibenzo[*b*,*f*]pyrrolo[2',3':7,8]chromeno[4,3-*h*]indolizine (6*gb*)**

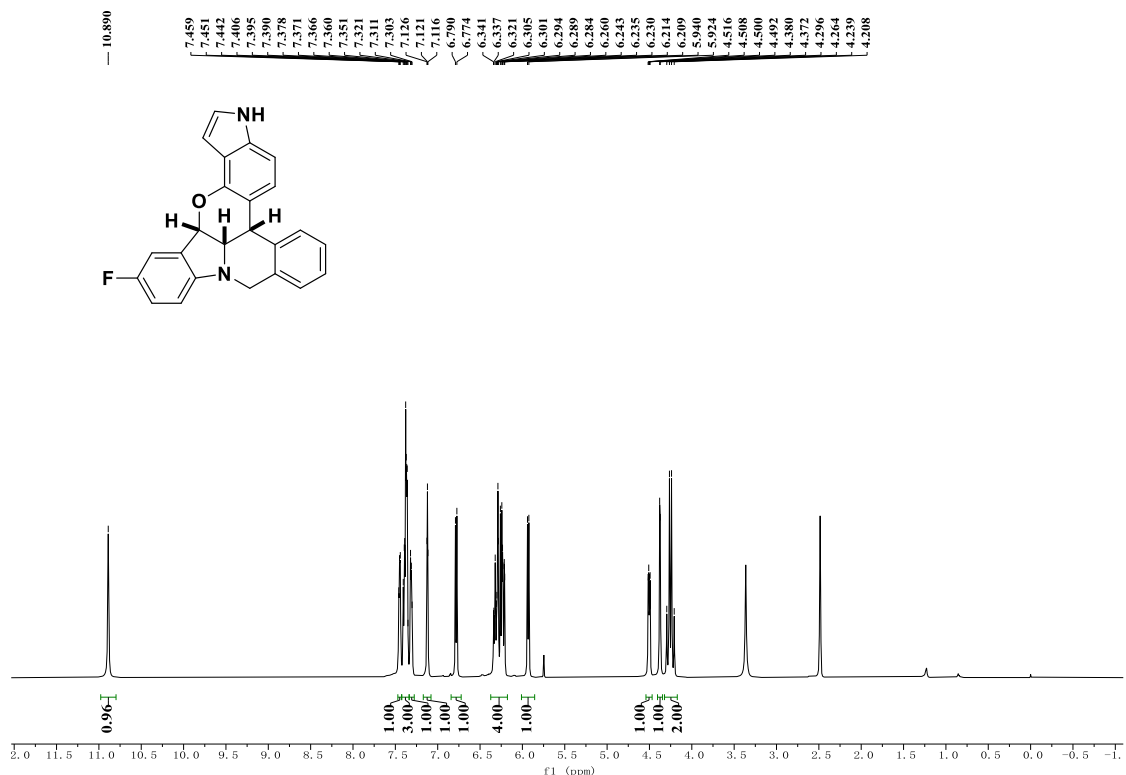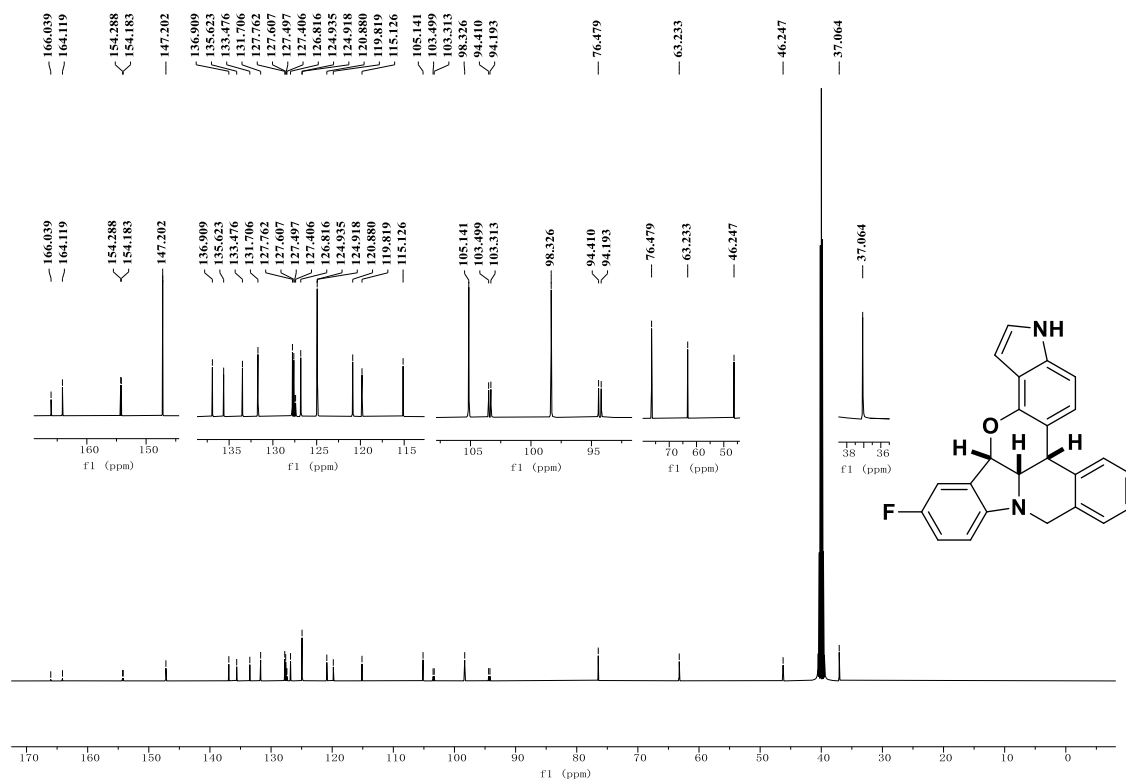

-127.129

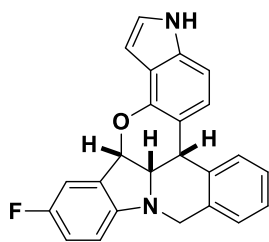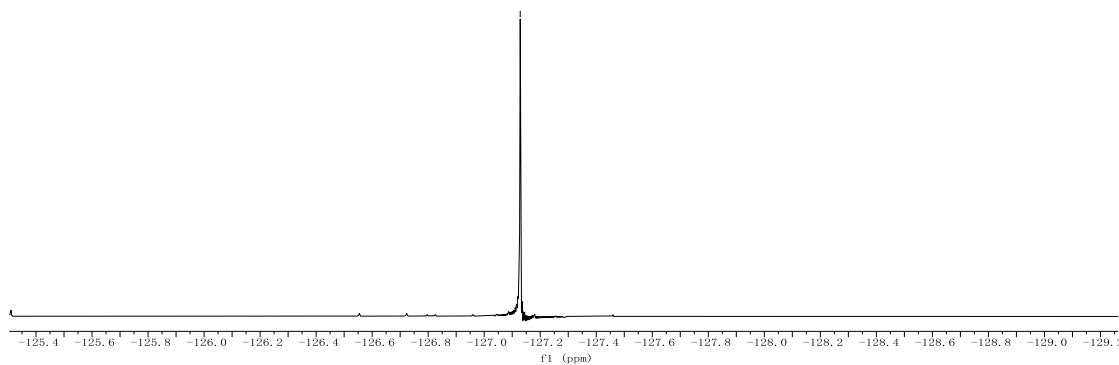

**(5*b*S,5*b*1*S*,15*b*S)-14-chloro-5*b*,5*b*1,10,15*b*-tetrahydro-3*H*-  
dibenzo[*b*,*f*]pyrrolo[2',3':7,8]chromeno[4,3,2-*h*]indolizine (6*hb*)**

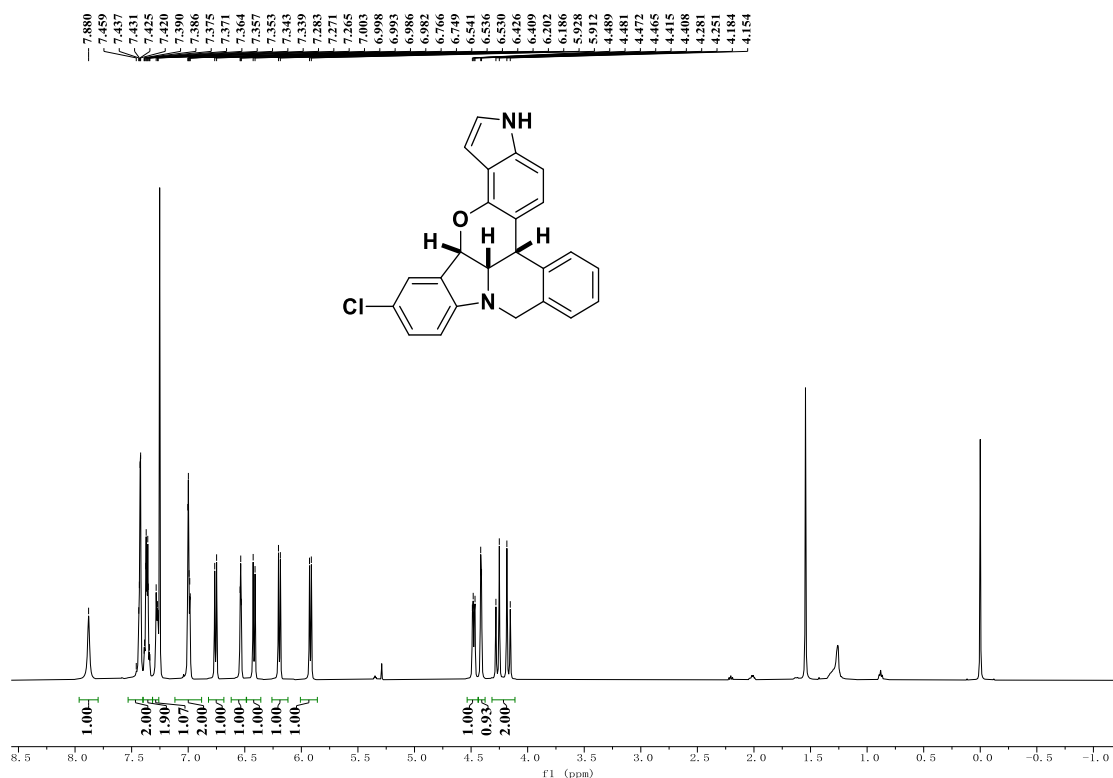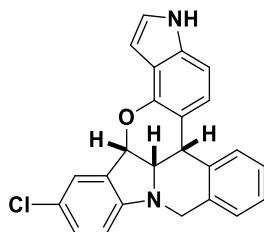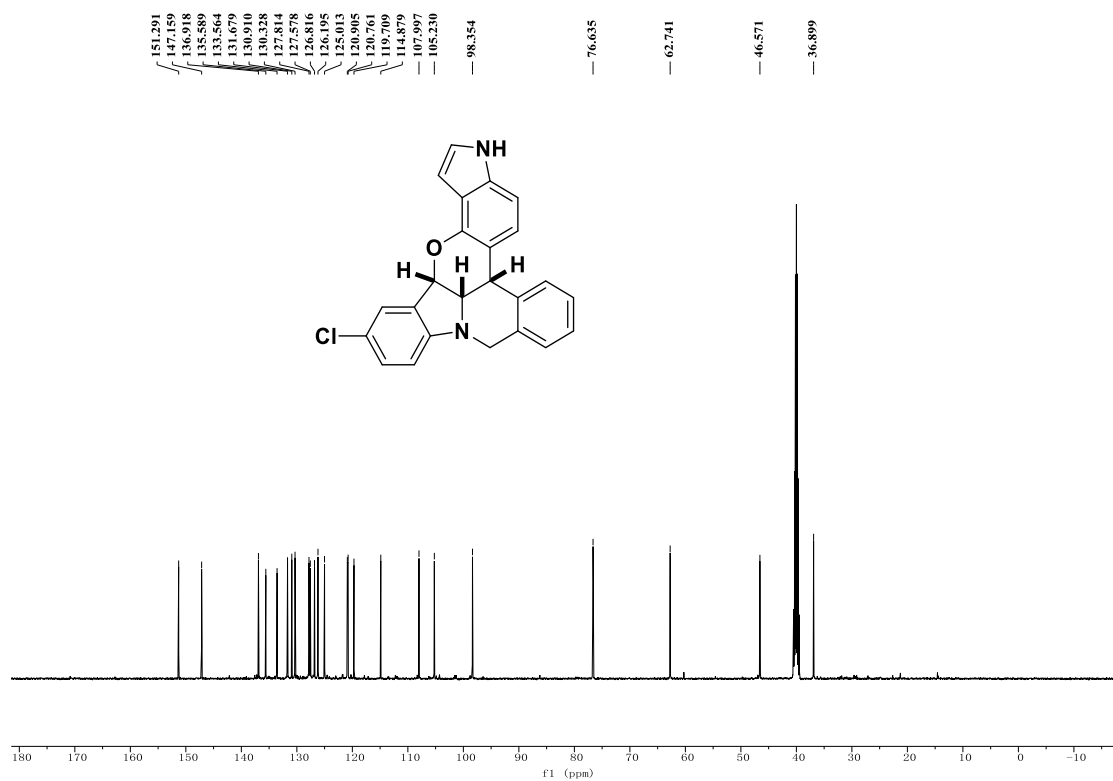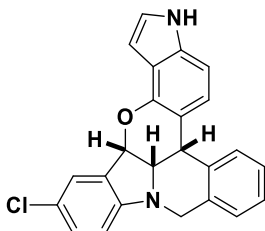

**(5*b*S,5*b*1*S*,15*b*S)-13-fluoro-5*b*,5*b*1,10,15*b*-tetrahydro-3*H*-  
dibenzo[*b*,*f*]pyrrolo[2',3':7,8]chromeno[4,3-*h*]indolizine (6*ib*)**

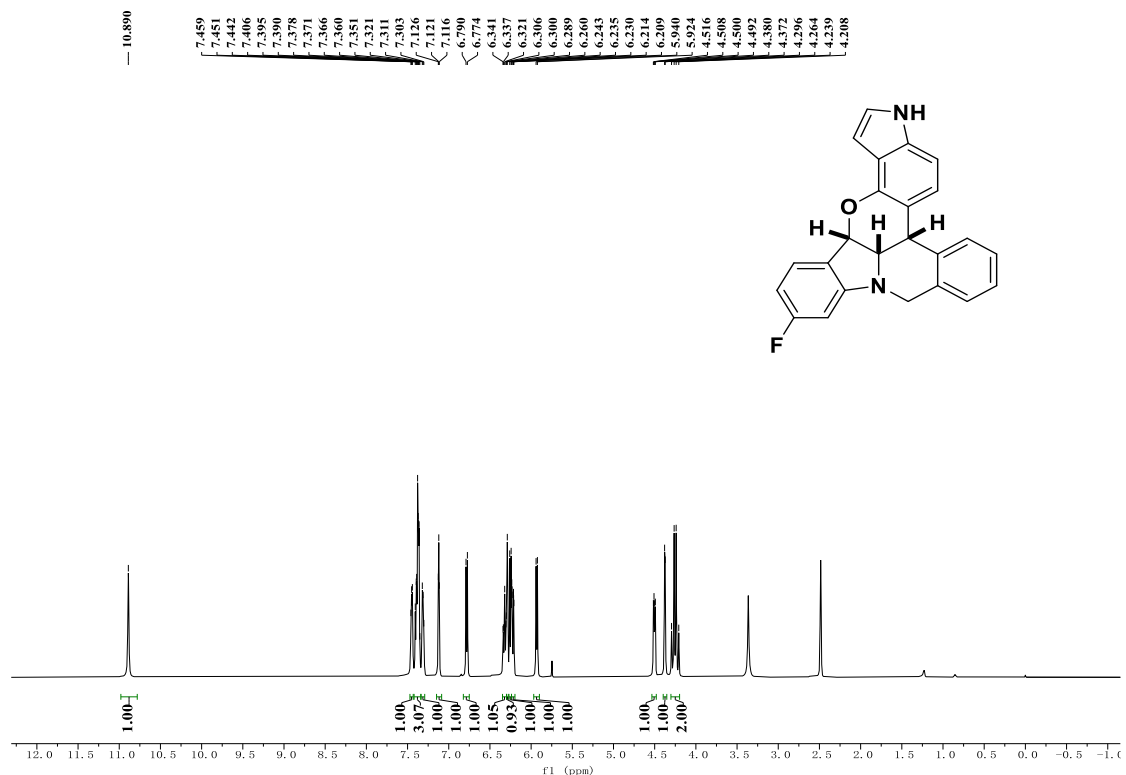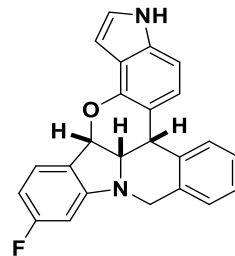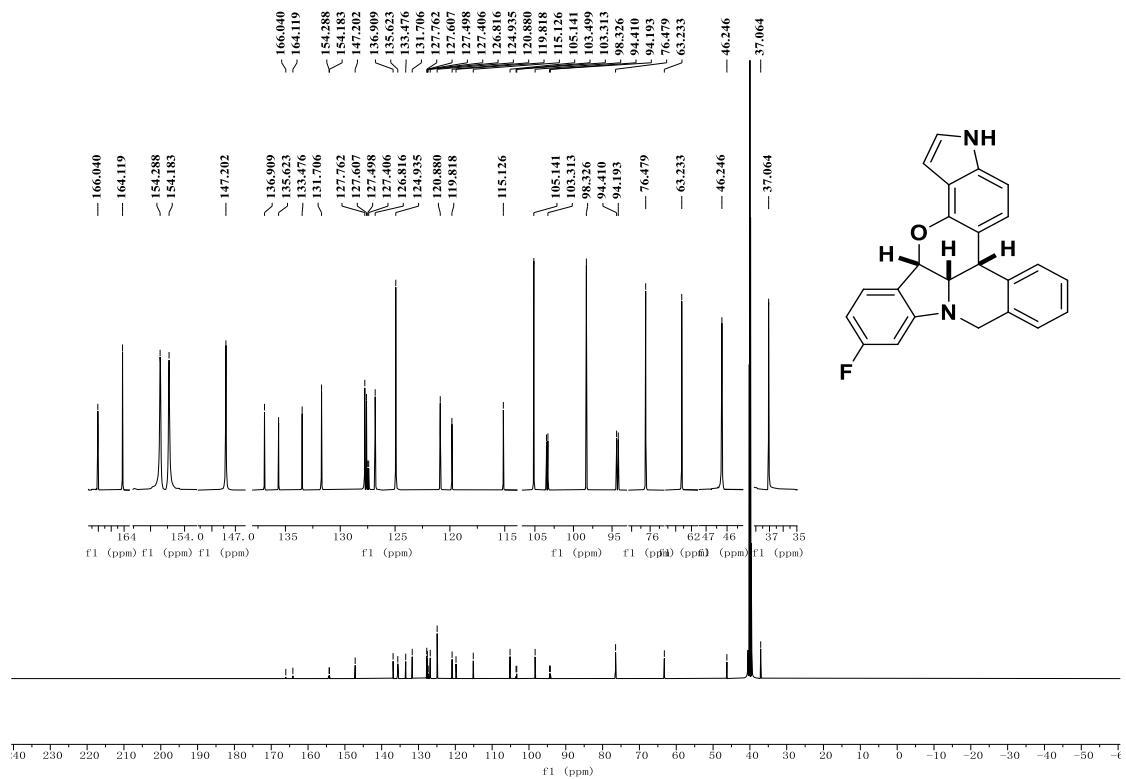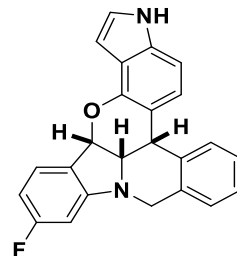



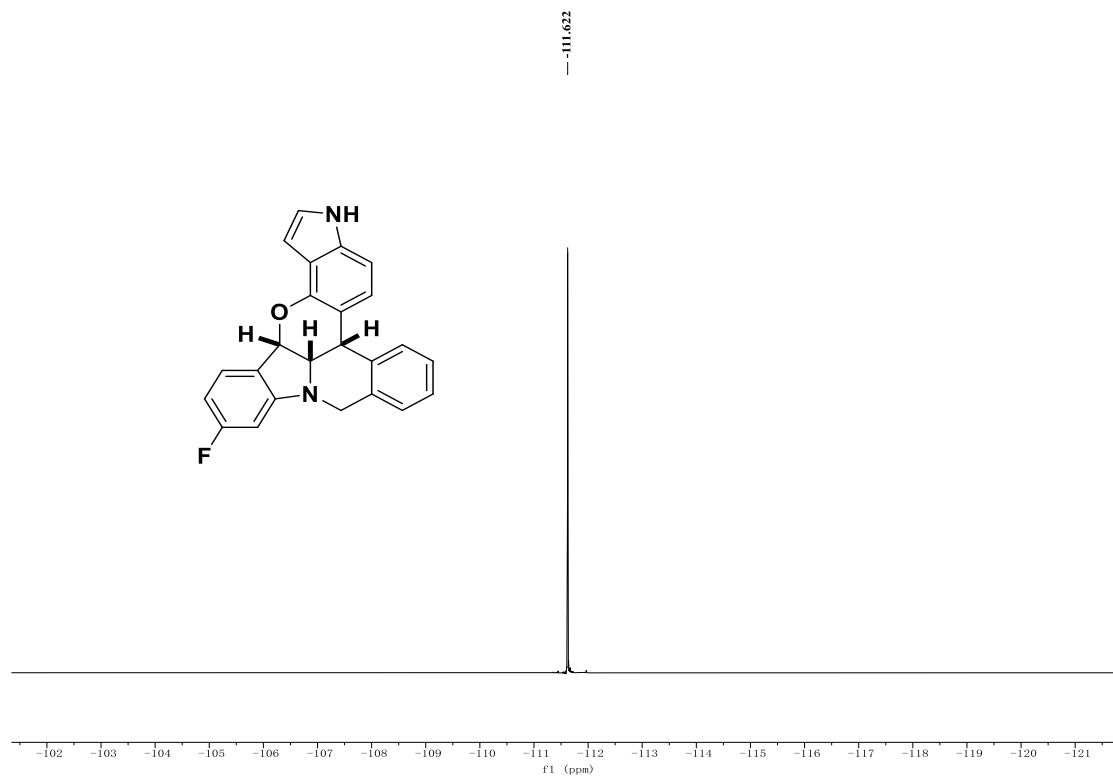



**(5*b*S,5*b*1*S*,15*b*S)-5*b*1-methyl-5*b*,5*b*1,10,15*b*-tetrahydro-3*H*-  
dibenzo[*b*,*f*]pyrrolo[2',3':7,8]chromeno[4,3,2-*h*]indolizine (6*kb*)**

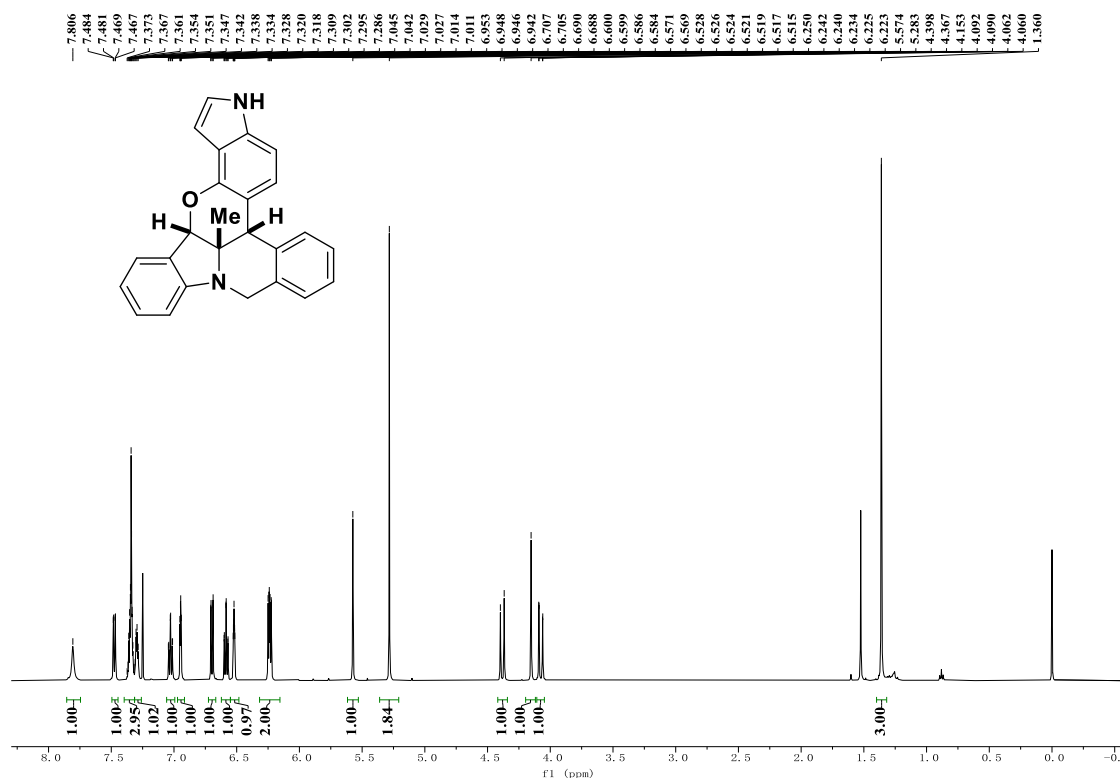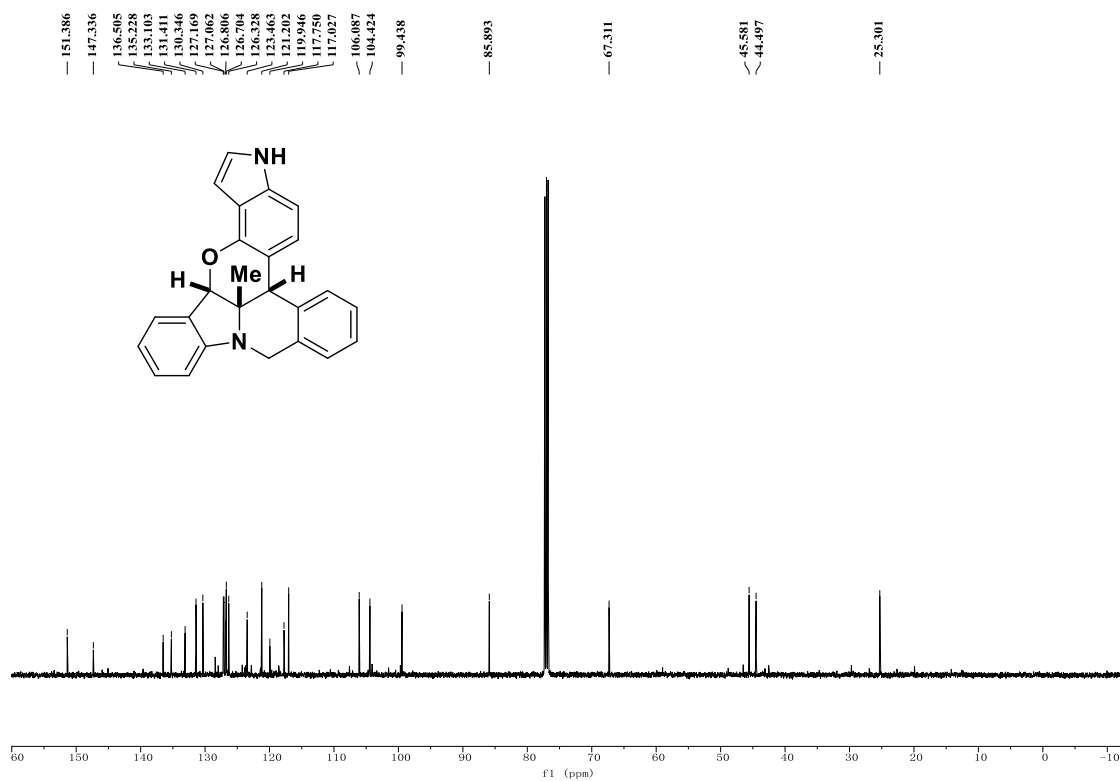

**(5*b*S,5*b*1*S*,15*b*S)-15*b*-methyl-5*b*,5*b*1,10,15*b*-tetrahydro-3*H*-  
dibenzo[*b*,*f*]pyrrolo[2',3':7,8]chromeno[4,3,2-*h*]indolizine (6*b*)**

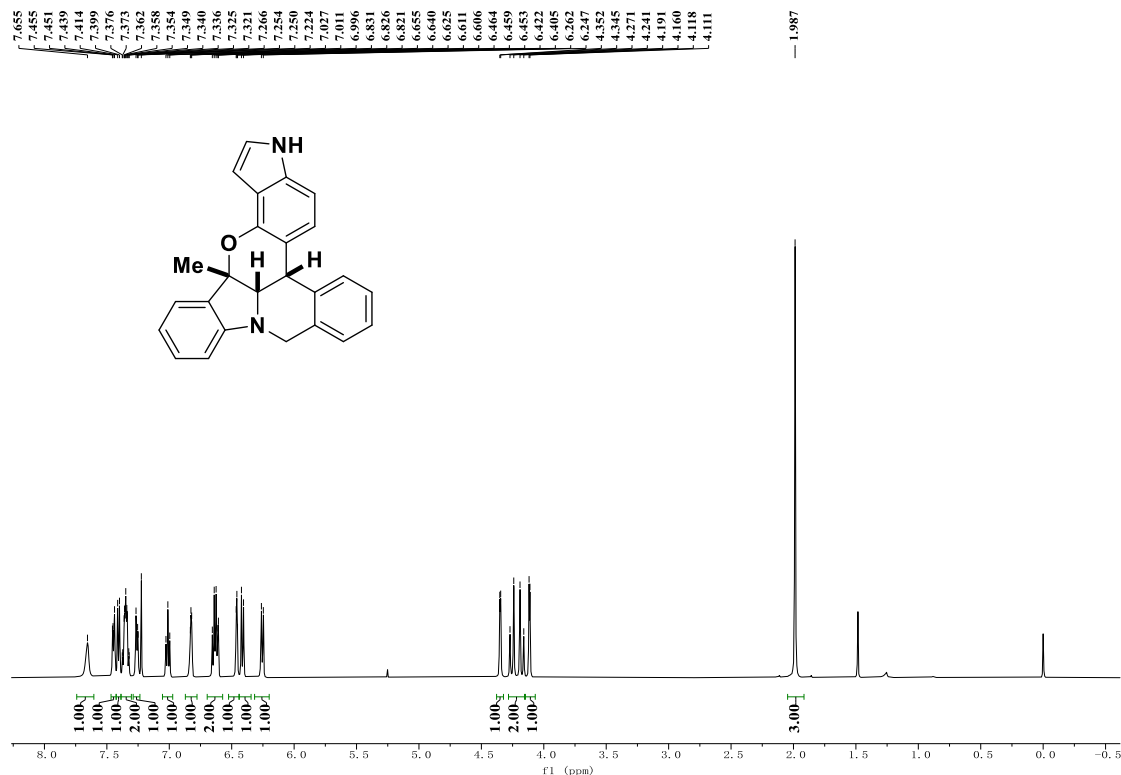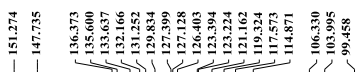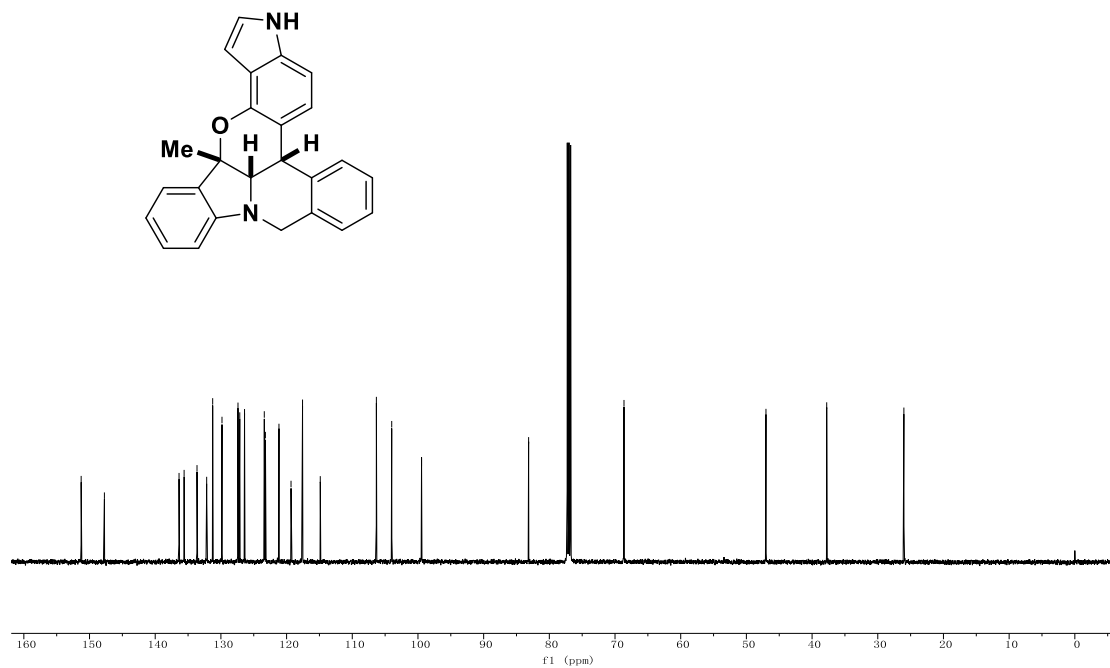

**(5*b*S,5*b*1*S*,15*b*S)-5*b*1,15*b*-dimethyl-5*b*,5*b*1,10,15*b*-tetrahydro-3*H*-  
dibenzo[*b*,*f*]pyrrolo[2',3':7,8]chromeno[4,3-*h*]indolizine (6*mb*)**

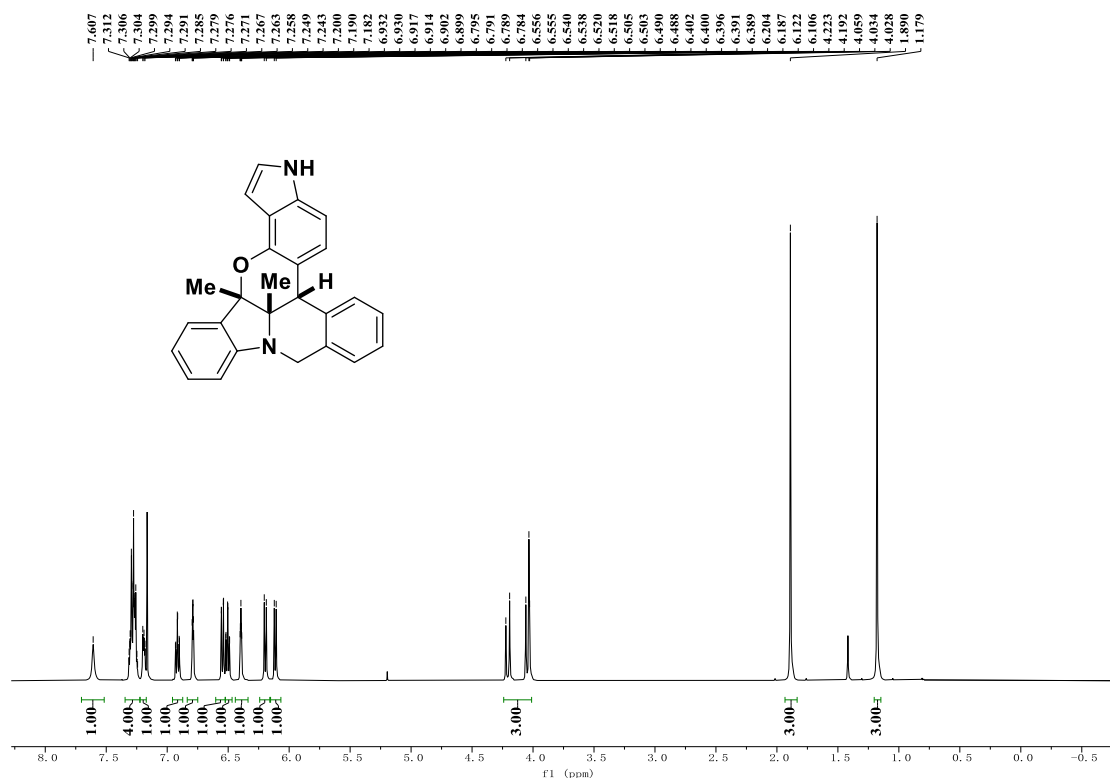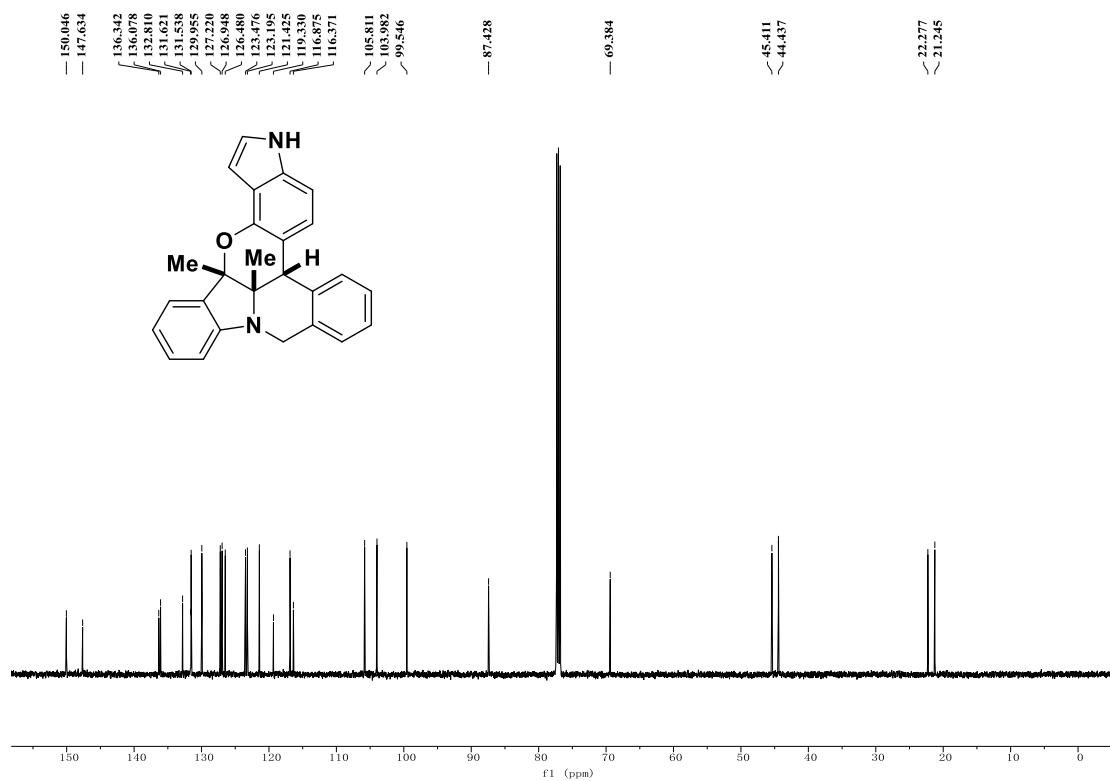

## 7. X-ray Crystallography Data

### 7.1 X-ray crystallography data of 3aa.

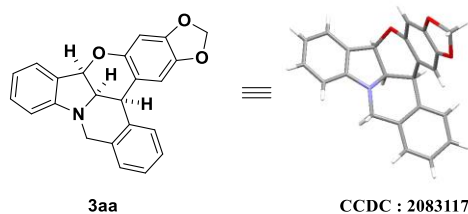

|                                   |                                                                                                                  |
|-----------------------------------|------------------------------------------------------------------------------------------------------------------|
| Identification code               | 10439                                                                                                            |
| Empirical formula                 | C <sub>23</sub> H <sub>17</sub> N O <sub>3</sub>                                                                 |
| Formula weight                    | 355.38                                                                                                           |
| Temperature                       | 293(2) K                                                                                                         |
| Wavelength                        | 1.54178 Å                                                                                                        |
| Crystal system, space group       | Monoclinic, C <sub>2</sub> /c                                                                                    |
| Unit cell dimensions              | a = 11.9483(6) Å alpha = 90 deg.<br>b = 17.9325(13) Å beta = 90.010(6) deg.<br>c = 16.0130(11) Å gamma = 90 deg. |
| Volume                            | 3431.0(4) Å <sup>3</sup>                                                                                         |
| Z, Calculated density             | 8, 1.376 Mg/m <sup>3</sup>                                                                                       |
| Absorption coefficient            | 0.738 mm <sup>-1</sup>                                                                                           |
| F(000)                            | 1488                                                                                                             |
| Crystal size                      | 0.120 x 0.110 x 0.110 mm                                                                                         |
| Theta range for data collection   | 4.447 to 67.222 deg.                                                                                             |
| Limiting indices                  | -14 ≤ h ≤ 8, -21 ≤ k ≤ 20, -19 ≤ l ≤ 19                                                                          |
| Reflections collected / unique    | 10183 / 3056 [R(int) = 0.0579]                                                                                   |
| Completeness to theta = 67.222    | 99.8 %                                                                                                           |
| Refinement method                 | Full-matrix least-squares on F <sup>2</sup>                                                                      |
| Data / restraints / parameters    | 3056 / 0 / 244                                                                                                   |
| Goodness-of-fit on F <sup>2</sup> | 1.015                                                                                                            |
| Final R indices [I > 2σ(I)]       | R1 = 0.0951, wR2 = 0.2612                                                                                        |
| R indices (all data)              | R1 = 0.1454, wR2 = 0.3137                                                                                        |

Extinction coefficient n/a  
Largest diff. peak and hole 0.756 and -0.220 e.A<sup>-3</sup>

## 7.2 X-ray crystallography data of 5aa.

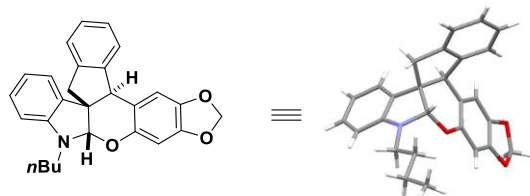

5aa

CCDC : 2083118

Identification code exp\_11683  
Empirical formula C<sub>27</sub> H<sub>25</sub> N O<sub>3</sub>  
Formula weight 411.48  
Temperature 293(2) K  
Wavelength 1.54184 Å  
Crystal system, space group Orthorhombic, Pna2(1)  
Unit cell dimensions a = 24.355(2) Å alpha = 90 deg.  
b = 6.4076(7) Å beta = 90 deg.  
c = 13.2555(16) Å gamma = 90 deg.  
Volume 2068.6(4) Å<sup>3</sup>  
Z, Calculated density 4, 1.321 Mg/m<sup>3</sup>  
Absorption coefficient 0.682 mm<sup>-1</sup>  
F(000) 872  
Crystal size 0.120 x 0.120 x 0.110 mm  
Theta range for data collection 3.630 to 67.229 deg.  
Limiting indices -29 ≤ h ≤ 27, -7 ≤ k ≤ 6, -15 ≤ l ≤ 15  
Reflections collected / unique 12326 / 3375 [R(int) = 0.1340]  
Completeness to theta = 67.229 100.0 %  
Refinement method Full-matrix least-squares on F<sup>2</sup>  
Data / restraints / parameters 3375 / 1 / 282  
Goodness-of-fit on F<sup>2</sup> 0.994  
Final R indices [I > 2σ(I)] R1 = 0.0842, wR2 = 0.1873

R indices (all data) R1 = 0.1635, wR2 = 0.2664

Absolute structure parameter 0.0(5)

Extinction coefficient 0.0088(12)

Largest diff. peak and hole 0.228 and -0.248 e.A<sup>-3</sup>

### 7.3 X-ray crystallography data of 6kb.

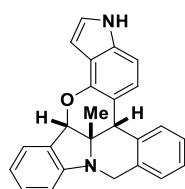

6kb

≡

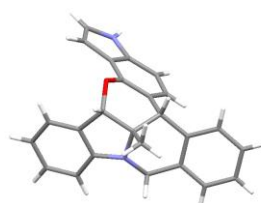

CCDC : 2112489

Identification code exp\_12437

Empirical formula C<sub>25</sub> H<sub>20</sub> N<sub>2</sub> O

Formula weight 364.43

Temperature 293(2) K

Wavelength 1.54184 Å

Crystal system, space group Monoclinic, P2(1)/n

Unit cell dimensions a = 9.2685(8) Å alpha = 90 deg.  
b = 18.7779(14) Å beta = 101.311(9) deg.  
c = 10.9806(10) Å gamma = 90 deg.

Volume 1874.0(3) Å<sup>3</sup>

Z, Calculated density 4, 1.292 Mg/m<sup>3</sup>

Absorption coefficient 0.621 mm<sup>-1</sup>

F(000) 768

Crystal size 0.120 x 0.120 x 0.110 mm

Theta range for data collection 4.710 to 67.243 deg.

Limiting indices -11 ≤ h ≤ 9, -22 ≤ k ≤ 16, -8 ≤ l ≤ 13

Reflections collected / unique 6628 / 3353 [R(int) = 0.0518]

Completeness to theta = 67.243 99.9 %

Refinement method Full-matrix least-squares on F<sup>2</sup>

Data / restraints / parameters 3353 / 0 / 255



Goodness-of-fit on  $F^2$       0.983  
Final R indices [ $I > 2\sigma(I)$ ]     $R_1 = 0.0572$ ,  $wR_2 = 0.1032$   
R indices (all data)             $R_1 = 0.1214$ ,  $wR_2 = 0.1399$   
Extinction coefficient          0.00169(14)  
Largest diff. peak and hole    0.156 and -0.168 e. $\text{\AA}^{-3}$
